# Supplementary material for: LncIRS1 controls muscle atrophy via sponging miR‐15 family to activate IGF1‐PI3K/AKT pathway
Source: PubMed Central journal article supplement — J Cachexia Sarcopenia Muscle. 2019 Jan 30;10(2):391–410. doi: 10.1002/jcsm.12374 (PMC6463472; doi:10.1002/jcsm.12374), 2019-01-30
Supplement: JCSM-10-391-s001.pdf [file JCSM-10-391-s001.pdf]

## SUPPLEMENTARY MATERIAL

### ***LncIRS1* controls muscle atrophy via sponging miR-15 family to activate IGF1-PI3K/AKT pathway**

Journal name: Journal of Cachexia, Sarcopenia and Muscle

Zhenhui Li<sup>1, 2</sup>, Bolin Cai<sup>1, 2</sup>, Bahareldin Ali Abdalla<sup>1, 2</sup>, Xuenong Zhu<sup>1, 2, 3</sup>, Ming  
Zheng<sup>1, 2</sup>, Peigong Han<sup>1, 2</sup>, Qinghua Nie<sup>1, 2\*</sup>, Xiquan Zhang<sup>1, 2</sup>

<sup>1</sup>Department of Animal Genetics, Breeding and Reproduction, College of Animal  
Science, South China Agricultural University, Guangzhou 510642, Guangdong,  
China.

<sup>2</sup>Guangdong Provincial Key Lab of Agro-Animal Genomics and Molecular Breeding,  
and Key Laboratory of Chicken Genetics, Breeding and Reproduction, Ministry of  
Agriculture, Guangzhou 510642, Guangdong, China.

<sup>3</sup>Institute of Biotechnology, Nanchang Normal University, Nanchang 330032, Jiangxi,  
China

\*To whom correspondence should be addressed. Tel: 86-20-85285759; Fax:  
86-20-85280740; Email: nqinghua@scau.edu.cn.

**Table S1. Differential expression analysis of lncRNAs in breast muscle between hypertrophic and leaner broilers.**

| Transcript_id  | Locus                 | WRR-FPKM | XH-FPKM | Log2(WRR/XH) | q value    |
|----------------|-----------------------|----------|---------|--------------|------------|
| TCONS_00001714 | 1:133447394-133448018 | 0        | 20.3823 | -5           | 0.00065227 |
| TCONS_00001934 | 1:168787042-168796284 | 0        | 13.8781 | -5           | 0.00065227 |
| TCONS_00003147 | 1:78236353-78240171   | 0        | 13.4177 | -5           | 0.00065227 |
| TCONS_00028370 | 13:15349797-15351419  | 0        | 23.8278 | -5           | 0.00065227 |
| TCONS_00039385 | 2:45686578-45708665   | 0        | 35.5296 | -5           | 0.00065227 |
| TCONS_00056274 | 21:2569093-2570533    | 0        | 13.4858 | -5           | 0.00065227 |
| TCONS_00064342 | 3:91425576-91442751   | 0        | 52.8614 | -5           | 0.00065227 |
| TCONS_00075810 | 4:48734892-48748585   | 0        | 30.3253 | -5           | 0.00065227 |
| TCONS_00075876 | 4:52554346-52557441   | 0        | 33.9589 | -5           | 0.00065227 |
| TCONS_00092129 | 6:24654609-24655893   | 0        | 30.6196 | -5           | 0.00065227 |
| TCONS_00092802 | 6:31454808-31489231   | 0        | 101.693 | -5           | 0.00065227 |
| TCONS_00097707 | 7:35811781-35812860   | 0        | 14.6875 | -5           | 0.00065227 |
| TCONS_00045553 | 2:40454398-40457644   | 2.0953   | 16.8451 | -3.007100268 | 0.00065227 |
| TCONS_00091420 | 5:54103495-54105791   | 3.54081  | 17.8504 | -2.333805067 | 0.00065227 |
| TCONS_00040147 | 2:129038942-129055865 | 29.2494  | 146.362 | -2.323062099 | 0.00065227 |
| TCONS_00092559 | 6:19317132-19330281   | 10.2362  | 44.4051 | -2.117045141 | 0.00065227 |
| TCONS_00039409 | 2:47688331-47711788   | 8.00685  | 31.8777 | -1.993240857 | 0.00065227 |
| TCONS_00012640 | 1:94456175-94460691   | 7.2516   | 28.8383 | -1.991614868 | 0.00065227 |
| TCONS_00022108 | 10:10437509-10440564  | 7.83267  | 30.5995 | -1.965931997 | 0.00065227 |
| TCONS_00012708 | 1:95369162-95373029   | 3.91098  | 14.1338 | -1.853547336 | 0.00065227 |
| TCONS_00057772 | 23:2106201-2106706    | 21326.7  | 76934.5 | -1.850969949 | 0.00065227 |
| TCONS_00046750 | 2:53053026-53055471   | 5.92657  | 20.679  | -1.802897129 | 0.00065227 |
| TCONS_00013296 | 1:105247815-105249854 | 5.78851  | 19.577  | -1.75789576  | 0.00065227 |
| TCONS_00012643 | 1:94463449-94467909   | 6.23131  | 20.6642 | -1.729526116 | 0.00065227 |
| TCONS_00012642 | 1:94461122-94463207   | 5.63648  | 18.2606 | -1.695867788 | 0.00065227 |
| TCONS_00010966 | 1:74538575-74540632   | 6.57829  | 20.5863 | -1.645900041 | 0.00065227 |
| TCONS_00076040 | 4:62696168-62704356   | 46.4583  | 135.168 | -1.540745376 | 0.00065227 |
| TCONS_00012639 | 1:94453496-94456124   | 9.42448  | 26.357  | -1.483701245 | 0.00065227 |
| TCONS_00116213 | Z:34651878-34654238   | 8.86948  | 24.5128 | -1.466613857 | 0.00065227 |
| TCONS_00098001 | 7:2732526-2734854     | 10.2772  | 27.9447 | -1.443127428 | 0.00065227 |
| TCONS_00020312 | 10:18750221-18758012  | 16.0844  | 43.084  | -1.421490079 | 0.00065227 |
| TCONS_00100717 | 7:31026394-31029288   | 7.29788  | 19.4095 | -1.41121362  | 0.00065227 |
| TCONS_00048903 | 2:78579218-78581542   | 11.7928  | 31.3091 | -1.408675735 | 0.00065227 |
| TCONS_00040214 | 2:138981856-138988220 | 12.0901  | 31.7766 | -1.394138591 | 0.00065227 |
| TCONS_00091422 | 5:54106543-54110251   | 9.70363  | 25.2372 | -1.378955409 | 0.00065227 |
| TCONS_00015768 | 1:132322951-132327679 | 7.50805  | 18.7743 | -1.322248955 | 0.00065227 |
| TCONS_00077197 | 4:13268226-13274310   | 14.1637  | 35.1917 | -1.313037016 | 0.00065227 |
| TCONS_00021334 | 10:4296715-4299955    | 7.86986  | 18.7209 | -1.250239917 | 0.00065227 |
| TCONS_00022107 | 10:10425915-10437436  | 13.8641  | 32.3627 | -1.22297801  | 0.00065227 |
| TCONS_00047722 | 2:61711059-61713716   | 9.55594  | 22.0874 | -1.208753903 | 0.00065227 |
| TCONS_00082792 | 4:80097656-80100214   | 13.5483  | 31.2816 | -1.207202468 | 0.00065227 |
| TCONS_00073069 | 3:96802239-96811392   | 9.65156  | 22.1572 | -1.198941528 | 0.00065227 |
| TCONS_00091413 | 5:54092923-54097296   | 5.98185  | 13.4878 | -1.17299141  | 0.00065227 |
| TCONS_00071234 | 3:64038625-64044855   | 10.5643  | 23.6336 | -1.161642229 | 0.00065227 |
| TCONS_00066428 | 3:17582310-17588625   | 6.59451  | 14.4875 | -1.135471291 | 0.00065227 |
| TCONS_00007863 | 1:40771818-40773905   | 15.8108  | 34.4929 | -1.125389061 | 0.00065227 |
| TCONS_00047731 | 2:61725498-61727893   | 15.7687  | 33.5939 | -1.091135565 | 0.00065227 |
| TCONS_00071229 | 3:64029160-64031551   | 14.8508  | 31.2254 | -1.072179403 | 0.00065227 |

|                |                       |         |         |              |            |
|----------------|-----------------------|---------|---------|--------------|------------|
| TCONS_00100715 | 7:31021988-31025508   | 8.14788 | 16.8193 | -1.045621026 | 0.00065227 |
| TCONS_00022125 | 10:10464408-10466795  | 18.023  | 37.1244 | -1.042528536 | 0.00065227 |
| TCONS_00047466 | 2:60371745-60374147   | 13.0703 | 26.8866 | -1.040595072 | 0.00065227 |
| TCONS_00082794 | 4:80100959-80105153   | 18.2293 | 37.1506 | -1.027126348 | 0.00065227 |
| TCONS_00107385 | 9:13809491-13811576   | 137.17  | 68.2505 | 1.007053469  | 0.00065227 |
| TCONS_00088472 | 5:26481763-26484148   | 40.8437 | 20.3073 | 1.008115129  | 0.00065227 |
| TCONS_00071898 | 3:74674452-74678587   | 29.5629 | 14.6796 | 1.009975142  | 0.00065227 |
| TCONS_00081794 | 4:65825315-65828271   | 40.7184 | 20.1848 | 1.012411581  | 0.00065227 |
| TCONS_00029163 | 13:11412692-11416181  | 26.1836 | 12.9231 | 1.018711282  | 0.00065227 |
| TCONS_00007441 | 1:35407529-35409671   | 30.191  | 14.8311 | 1.025492939  | 0.00065227 |
| TCONS_00054193 | 20:5869976-5871379    | 1407.73 | 687.927 | 1.033043269  | 0.00065227 |
| TCONS_00056423 | 21:6331517-6334048    | 31.1614 | 15.2161 | 1.034161419  | 0.00065227 |
| TCONS_00066041 | 3:14899896-14903022   | 20.7313 | 10.098  | 1.037741004  | 0.00065227 |
| TCONS_00017879 | 1:168621477-168626503 | 19.9329 | 9.69345 | 1.040069488  | 0.00065227 |
| TCONS_00071899 | 3:74678701-74681412   | 31.5742 | 15.2997 | 1.045242816  | 0.00065227 |
| TCONS_00085527 | 5:54126627-54130471   | 26.8778 | 13.0151 | 1.046228659  | 0.00065227 |
| TCONS_00083497 | 4:89638013-89640720   | 29.5313 | 14.2964 | 1.046592962  | 0.00065227 |
| TCONS_00055774 | 20:13382833-13388413  | 25.8374 | 12.5061 | 1.046828942  | 0.00065227 |
| TCONS_00009662 | 1:62391576-62398205   | 30.044  | 14.4353 | 1.057475813  | 0.00065227 |
| TCONS_00015418 | 1:129672876-129676736 | 79.3531 | 38.1047 | 1.058317627  | 0.00065227 |
| TCONS_00061513 | 28:4073140-4075199    | 61.3744 | 29.3988 | 1.061879747  | 0.00065227 |
| TCONS_00037703 | 19:1673233-1675500    | 38.4036 | 18.3291 | 1.067105609  | 0.00065227 |
| TCONS_00067971 | 3:33222053-33224498   | 102.2   | 48.353  | 1.079717889  | 0.00065227 |
| TCONS_00037642 | 19:1496009-1499607    | 29.0958 | 13.7318 | 1.083290164  | 0.00065227 |
| TCONS_00102021 | 8:10993026-11000630   | 106.051 | 49.9454 | 1.086334509  | 0.00065227 |
| TCONS_00025630 | 12:1729166-1731126    | 56.1246 | 26.402  | 1.087986037  | 0.00065227 |
| TCONS_00077616 | 4:17993187-17995659   | 30.455  | 14.2722 | 1.093471367  | 0.00065227 |
| TCONS_00071902 | 3:74688000-74690349   | 27.5107 | 12.8805 | 1.094804251  | 0.00065227 |
| TCONS_00051479 | 2:113123703-113130486 | 16.6008 | 7.76324 | 1.096521973  | 0.00065227 |
| TCONS_00107581 | 9:15529769-15532200   | 21.7449 | 10.1308 | 1.10192897   | 0.00065227 |
| TCONS_00067025 | 3:24327977-24331109   | 217.549 | 100.556 | 1.113341218  | 0.00065227 |
| TCONS_00077460 | 4:16441346-16443607   | 34.0984 | 15.6603 | 1.122592195  | 0.00065227 |
| TCONS_00088383 | 5:25781662-25794102   | 61.9947 | 28.4105 | 1.125720661  | 0.00065227 |
| TCONS_00037697 | 19:1623839-1629335    | 30.3747 | 13.8805 | 1.129810623  | 0.00065227 |
| TCONS_00099988 | 7:23125694-23127781   | 48.8302 | 22.2197 | 1.135934349  | 0.00065227 |
| TCONS_00087905 | 5:22798009-22801063   | 20.3211 | 9.22293 | 1.139681445  | 0.00065227 |
| TCONS_00058537 | 23:4105511-4107767    | 29.2805 | 13.2872 | 1.139903071  | 0.00065227 |
| TCONS_00002892 | 1:56879781-56881810   | 30.8816 | 13.9662 | 1.144807964  | 0.00065227 |
| TCONS_00073874 | 4:535842-541963       | 27.755  | 12.5188 | 1.148651415  | 0.00065227 |
| TCONS_00092803 | 6:31527603-31533239   | 20.8802 | 9.41174 | 1.149602159  | 0.00065227 |
| TCONS_00086276 | 5:7537127-7540608     | 191.655 | 86.19   | 1.152919238  | 0.00065227 |
| TCONS_00037648 | 19:1518583-1521566    | 18.7287 | 8.41953 | 1.153439157  | 0.00065227 |
| TCONS_00088564 | 5:26887963-26891749   | 28.7617 | 12.8745 | 1.159632547  | 0.00065227 |
| TCONS_00086268 | 5:7522823-7525077     | 224.515 | 100.473 | 1.160003976  | 0.00065227 |
| TCONS_00107235 | 9:11925653-11929043   | 16.1492 | 7.22613 | 1.160167584  | 0.00065227 |
| TCONS_00066855 | 3:22413449-22416445   | 39.5926 | 17.6038 | 1.169343924  | 0.00065227 |
| TCONS_00063889 | 3:43380263-43383295   | 24.0259 | 10.6354 | 1.17571618   | 0.00065227 |
| TCONS_00009389 | 1:61007888-61011443   | 20.4289 | 9.03648 | 1.176778713  | 0.00065227 |
| TCONS_00001532 | 1:118583864-118590832 | 281.185 | 124.35  | 1.177113127  | 0.00065227 |
| TCONS_00037041 | 19:6581553-6584552    | 30.3968 | 13.3563 | 1.186399049  | 0.00065227 |
| TCONS_00025658 | 12:2467156-2477661    | 48.2642 | 21.1417 | 1.190862078  | 0.00065227 |

|                |                       |         |         |             |            |
|----------------|-----------------------|---------|---------|-------------|------------|
| TCONS_00099995 | 7:23278513-23284020   | 18.9931 | 8.20594 | 1.210734887 | 0.00065227 |
| TCONS_00054544 | 20:5721041-5727697    | 36.7898 | 15.8322 | 1.216444091 | 0.00065227 |
| TCONS_00061933 | 3:3063921-3074212     | 37.5793 | 16.1068 | 1.222268297 | 0.00065227 |
| TCONS_00102850 | 8:4914899-4917686     | 22.8321 | 9.77165 | 1.224389463 | 0.00065227 |
| TCONS_00086274 | 5:7532980-7536413     | 170.751 | 71.943  | 1.246967802 | 0.00065227 |
| TCONS_00004225 | 1:194456699-194464717 | 123.16  | 51.5558 | 1.256327128 | 0.00065227 |
| TCONS_00098189 | 7:3506688-3512405     | 41.3761 | 17.2955 | 1.258400945 | 0.00065227 |
| TCONS_00085395 | 5:44319599-44322066   | 157.972 | 65.7808 | 1.263930409 | 0.00065227 |
| TCONS_00106010 | 9:22229361-22235930   | 53.3725 | 22.0086 | 1.278029213 | 0.00065227 |
| TCONS_00037696 | 19:1620802-1623778    | 23.3492 | 9.6157  | 1.279909329 | 0.00065227 |
| TCONS_00056652 | 21:2274873-2277844    | 26.1065 | 10.7377 | 1.281724051 | 0.00065227 |
| TCONS_00031421 | 14:9908485-9910624    | 75.5902 | 31.0737 | 1.28250517  | 0.00065227 |
| TCONS_00086267 | 5:7519716-7522685     | 212.826 | 87.1596 | 1.287942929 | 0.00065227 |
| TCONS_00074758 | 4:59479351-59483950   | 46.6367 | 18.9838 | 1.296696901 | 0.00065227 |
| TCONS_00052512 | 2:126041841-126044595 | 19.1652 | 7.78908 | 1.298964213 | 0.00065227 |
| TCONS_00085551 | 5:54982261-54984487   | 55.5963 | 22.5381 | 1.302622974 | 0.00065227 |
| TCONS_00014571 | 1:119930329-119934679 | 81.6373 | 33.0739 | 1.303535294 | 0.00065227 |
| TCONS_00077869 | 4:19404194-19408293   | 21.6685 | 8.7445  | 1.309151486 | 0.00065227 |
| TCONS_00009382 | 1:60995664-61000440   | 29.2358 | 11.7533 | 1.314670187 | 0.00065227 |
| TCONS_00007326 | 1:33946374-33949471   | 16.3522 | 6.55724 | 1.318324142 | 0.00065227 |
| TCONS_00059565 | 25:1621891-1624206    | 26.1878 | 10.4916 | 1.319660156 | 0.00065227 |
| TCONS_00101056 | 7:34822766-34825959   | 21.843  | 8.7259  | 1.32379517  | 0.00065227 |
| TCONS_00112672 | Z:51016813-51019180   | 126.588 | 50.5031 | 1.325696798 | 0.00065227 |
| TCONS_00055778 | 20:13392145-13396357  | 30.3276 | 12.0447 | 1.332232873 | 0.00065227 |
| TCONS_00022958 | 10:19504931-19507759  | 22.453  | 8.8992  | 1.335160665 | 0.00065227 |
| TCONS_00021439 | 10:4476168-4478975    | 33.0566 | 13.0975 | 1.335646883 | 0.00065227 |
| TCONS_00037645 | 19:1507505-1510022    | 32.4087 | 12.8305 | 1.336803759 | 0.00065227 |
| TCONS_00028738 | 13:7751127-7755021    | 24.7528 | 9.78763 | 1.33856026  | 0.00065227 |
| TCONS_00064325 | 3:90401590-90404984   | 92.1425 | 36.3473 | 1.342018542 | 0.00065227 |
| TCONS_00066080 | 3:15320719-15322987   | 24.7522 | 9.75945 | 1.342685008 | 0.00065227 |
| TCONS_00055769 | 20:13358958-13364917  | 32.5242 | 12.6609 | 1.361133609 | 0.00065227 |
| TCONS_00019791 | 1:194450903-194456630 | 42.0528 | 16.3461 | 1.363255397 | 0.00065227 |
| TCONS_00062363 | 3:29654729-29660420   | 82.8033 | 32.0963 | 1.367281269 | 0.00065227 |
| TCONS_00092666 | 6:22548584-22553836   | 97.3945 | 37.7355 | 1.367917913 | 0.00065227 |
| TCONS_00088565 | 5:26891821-26897168   | 16.2833 | 6.29188 | 1.371830047 | 0.00065227 |
| TCONS_00097167 | 7:5994305-5999446     | 120.87  | 46.6941 | 1.372144035 | 0.00065227 |
| TCONS_00076466 | 4:553552-557171       | 20.2034 | 7.77185 | 1.378268141 | 0.00065227 |
| TCONS_00104873 | 8:26803225-26805460   | 72.252  | 27.7886 | 1.37854437  | 0.00065227 |
| TCONS_00053513 | 2:141709435-141711780 | 36.5029 | 14.0367 | 1.378807284 | 0.00065227 |
| TCONS_00059257 | 24:5635243-5640097    | 26.1176 | 10.0275 | 1.381060365 | 0.00065227 |
| TCONS_00008384 | 1:49507845-49511816   | 16.21   | 6.22013 | 1.381867453 | 0.00065227 |
| TCONS_00105002 | 8:27405808-27410512   | 34.5337 | 13.1577 | 1.392097591 | 0.00065227 |
| TCONS_00055773 | 20:13370441-13382770  | 42.7021 | 16.171  | 1.400898124 | 0.00065227 |
| TCONS_00013520 | 1:106569457-106571516 | 30.0984 | 11.3774 | 1.403515891 | 0.00065227 |
| TCONS_00102615 | 8:2149963-2153284     | 15.6765 | 5.8974  | 1.410452538 | 0.00065227 |
| TCONS_00053520 | 2:141722156-141724699 | 37.7327 | 14.1376 | 1.416278108 | 0.00065227 |
| TCONS_00086271 | 5:7527488-7530641     | 232.726 | 86.0222 | 1.435851463 | 0.00065227 |
| TCONS_00021800 | 10:7319362-7321535    | 34.8226 | 12.805  | 1.443316672 | 0.00065227 |
| TCONS_00083337 | 4:84903291-84905550   | 69.0715 | 25.2827 | 1.449940014 | 0.00065227 |
| TCONS_00040094 | 2:126037325-126041087 | 45.4284 | 16.4646 | 1.464227031 | 0.00065227 |
| TCONS_00008501 | 1:50503605-50506075   | 24.6292 | 8.88655 | 1.470674428 | 0.00065227 |

|                |                       |         |         |             |            |
|----------------|-----------------------|---------|---------|-------------|------------|
| TCONS_00029380 | 13:15060792-15063753  | 66.2238 | 23.6615 | 1.484808262 | 0.00065227 |
| TCONS_00013525 | 1:106574813-106577039 | 29.4489 | 10.4838 | 1.49005201  | 0.00065227 |
| TCONS_00055766 | 20:13352950-13355752  | 30.4794 | 10.7695 | 1.500883232 | 0.00065227 |
| TCONS_00037691 | 19:1606481-1609805    | 22.4706 | 7.93589 | 1.501574714 | 0.00065227 |
| TCONS_00102729 | 8:3633259-3635479     | 21.1136 | 7.43025 | 1.50668993  | 0.00065227 |
| TCONS_00108098 | 9:22881532-22886161   | 33.6891 | 11.8126 | 1.511955345 | 0.00065227 |
| TCONS_00056642 | 21:2115105-2117147    | 48.9336 | 17.079  | 1.518601919 | 0.00065227 |
| TCONS_00028446 | 13:485553-488442      | 26.7116 | 9.24387 | 1.530897519 | 0.00065227 |
| TCONS_00016255 | 1:137985256-137988266 | 23.8493 | 8.24307 | 1.532693271 | 0.00065227 |
| TCONS_00059418 | 25:1219524-1222839    | 39.5438 | 13.6139 | 1.538371097 | 0.00065227 |
| TCONS_00098714 | 7:7678970-7681073     | 17.9377 | 6.13754 | 1.54726249  | 0.00065227 |
| TCONS_00098190 | 7:3512472-3515444     | 63.9259 | 21.6184 | 1.564140815 | 0.00065227 |
| TCONS_00057956 | 23:200262-202140      | 584.124 | 197.287 | 1.565978768 | 0.00065227 |
| TCONS_00083336 | 4:84880657-84889031   | 40.4709 | 13.6142 | 1.571772723 | 0.00065227 |
| TCONS_00037618 | 19:1455679-1459154    | 14.6177 | 4.9097  | 1.574009552 | 0.00065227 |
| TCONS_00084896 | 5:15998006-16000132   | 53.6619 | 17.9478 | 1.580091124 | 0.00065227 |
| TCONS_00057327 | 22:2160855-2162522    | 35.477  | 11.7388 | 1.595599082 | 0.00065227 |
| TCONS_00037693 | 19:1610647-1613119    | 26.4826 | 8.71658 | 1.603210668 | 0.00065227 |
| TCONS_00009388 | 1:61005654-61007815   | 32.9007 | 10.7821 | 1.609480084 | 0.00065227 |
| TCONS_00093337 | 6:7515366-7517594     | 314.978 | 102.785 | 1.615621326 | 0.00065227 |
| TCONS_00040224 | 2:139422382-139426688 | 23.8611 | 7.77219 | 1.618267478 | 0.00065227 |
| TCONS_00088566 | 5:26897221-26900584   | 20.181  | 6.55342 | 1.622677764 | 0.00065227 |
| TCONS_00055771 | 20:13366697-13368978  | 33.5353 | 10.7122 | 1.646425707 | 0.00065227 |
| TCONS_00058565 | 23:4869327-4871557    | 32.8076 | 10.4135 | 1.655575016 | 0.00065227 |
| TCONS_00027797 | 13:910083-921920      | 43.1275 | 13.6649 | 1.658133187 | 0.00065227 |
| TCONS_00056854 | 21:3965015-3967405    | 15.7964 | 4.96961 | 1.668391263 | 0.00065227 |
| TCONS_00028445 | 13:482393-485131      | 31.4428 | 9.87547 | 1.67080838  | 0.00065227 |
| TCONS_00066572 | 3:19448019-19450220   | 30.0993 | 9.16721 | 1.715175308 | 0.00065227 |
| TCONS_00028367 | 13:15133197-15137794  | 49.1918 | 14.5421 | 1.758182225 | 0.00065227 |
| TCONS_00031118 | 14:6364910-6367091    | 18.0296 | 5.31093 | 1.76333097  | 0.00065227 |
| TCONS_00020377 | 10:351251-353457      | 25.4937 | 7.4824  | 1.768567775 | 0.00065227 |
| TCONS_00055448 | 20:8136606-8139349    | 12.7638 | 3.73711 | 1.772062973 | 0.00065227 |
| TCONS_00086277 | 5:7541554-7543816     | 40.2472 | 11.7619 | 1.774767289 | 0.00065227 |
| TCONS_00040485 | 2:15723496-15733389   | 40.2425 | 11.7594 | 1.774905482 | 0.00065227 |
| TCONS_00053510 | 2:141702224-141705216 | 43.6012 | 12.5854 | 1.792616771 | 0.00065227 |
| TCONS_00030106 | 14:1132626-1133627    | 91.6641 | 26.3147 | 1.800487869 | 0.00065227 |
| TCONS_00098715 | 7:7681607-7684048     | 21.3889 | 6.10353 | 1.809146511 | 0.00065227 |
| TCONS_00039424 | 2:49605509-49606518   | 49.5254 | 14.0064 | 1.822082433 | 0.00065227 |
| TCONS_00038772 | 19:9392705-9396906    | 22.5777 | 6.32077 | 1.836726301 | 0.00065227 |
| TCONS_00056871 | 21:4002655-4004972    | 22.9047 | 6.34432 | 1.852106221 | 0.00065227 |
| TCONS_00063467 | 3:14714982-14716438   | 386.976 | 105.646 | 1.87300595  | 0.00065227 |
| TCONS_00107444 | 9:14217264-14226430   | 24.4142 | 6.54715 | 1.898781567 | 0.00065227 |
| TCONS_00088130 | 5:24259416-24262045   | 28.4694 | 7.58554 | 1.908088296 | 0.00065227 |
| TCONS_00029092 | 13:10607579-10609594  | 22.9055 | 5.8829  | 1.961094637 | 0.00065227 |
| TCONS_00068724 | 3:42415488-42417595   | 22.9118 | 5.79068 | 1.984286125 | 0.00065227 |
| TCONS_00101117 | 7:35799201-35802365   | 22.4102 | 5.48328 | 2.031044473 | 0.00065227 |
| TCONS_00058406 | 23:2022865-2025107    | 22.1576 | 5.33184 | 2.055096231 | 0.00065227 |
| TCONS_00003366 | 1:100380619-100382122 | 2839.86 | 661.693 | 2.101585887 | 0.00065227 |
| TCONS_00020829 | 10:374974-379795      | 37.5693 | 8.70813 | 2.109119385 | 0.00065227 |
| TCONS_00013527 | 1:106577581-106579923 | 34.0586 | 7.7709  | 2.131865532 | 0.00065227 |
| TCONS_00093346 | 6:7657965-7660695     | 20.3814 | 4.55    | 2.163314703 | 0.00065227 |

|                |                       |         |         |             |            |
|----------------|-----------------------|---------|---------|-------------|------------|
| TCONS_00026670 | 12:8832595-8835338    | 16.3183 | 3.63184 | 2.167718217 | 0.00065227 |
| TCONS_00005666 | 1:14352253-14354396   | 107.496 | 23.6192 | 2.186250972 | 0.00065227 |
| TCONS_00028442 | 13:476196-478619      | 51.5242 | 11.0487 | 2.221373569 | 0.00065227 |
| TCONS_00020082 | 10:7482326-7483015    | 1313.45 | 272.579 | 2.268614958 | 0.00065227 |
| TCONS_00091453 | 5:54313244-54315289   | 51.3785 | 10.6376 | 2.271992077 | 0.00065227 |
| TCONS_00107450 | 9:14253307-14256999   | 113.261 | 23.0323 | 2.297920782 | 0.00065227 |
| TCONS_00105857 | 9:13779712-13795306   | 38.8656 | 7.88303 | 2.301671618 | 0.00065227 |
| TCONS_00020068 | 10:7321740-7326057    | 26.0711 | 5.20942 | 2.323256793 | 0.00065227 |
| TCONS_00059278 | 25:264244-269456      | 16.1346 | 3.20235 | 2.332954911 | 0.00065227 |
| TCONS_00028728 | 13:7733038-7735780    | 25.9564 | 5.0879  | 2.350948083 | 0.00065227 |
| TCONS_00003367 | 1:100384415-100388332 | 12651.2 | 2473.58 | 2.35460177  | 0.00065227 |
| TCONS_00104489 | 8:22842596-22845136   | 103.06  | 19.2702 | 2.419041047 | 0.00065227 |
| TCONS_00062863 | 3:67422995-67426027   | 57.3983 | 10.6343 | 2.432282937 | 0.00065227 |
| TCONS_00028729 | 13:7736047-7738630    | 21.0019 | 3.83473 | 2.453322944 | 0.00065227 |
| TCONS_00059312 | 25:743611-744765      | 1208.07 | 220.41  | 2.454442467 | 0.00065227 |
| TCONS_00105326 | 9:12148115-12153759   | 22.2158 | 4.0145  | 2.468293876 | 0.00065227 |
| TCONS_00028217 | 13:7832897-7842980    | 161.733 | 28.2837 | 2.515571309 | 0.00065227 |
| TCONS_00028340 | 13:13632133-13632710  | 447.537 | 75.7875 | 2.561975139 | 0.00065227 |
| TCONS_00105769 | 9:8434006-8452868     | 527.599 | 85.8592 | 2.619397195 | 0.00065227 |
| TCONS_00061016 | 27:4381234-4383860    | 22.8146 | 3.65607 | 2.641591762 | 0.00065227 |
| TCONS_00076534 | 4:1765900-1770017     | 87.4409 | 13.7493 | 2.66895008  | 0.00065227 |
| TCONS_00059438 | 25:1298489-1299373    | 1019    | 160.184 | 2.669352095 | 0.00065227 |
| TCONS_00090985 | 5:49555130-49559188   | 43.3977 | 6.59905 | 2.71728833  | 0.00065227 |
| TCONS_00074529 | 4:38964469-38966954   | 52.536  | 7.84763 | 2.742977432 | 0.00065227 |
| TCONS_00084705 | 5:7431546-7462146     | 20.8728 | 3.04411 | 2.777531748 | 0.00065227 |
| TCONS_00028868 | 13:9699796-9703272    | 25.3254 | 3.65309 | 2.793395853 | 0.00065227 |
| TCONS_00023407 | 11:1178587-1180369    | 284.05  | 40.9104 | 2.795605355 | 0.00065227 |
| TCONS_00106665 | 9:4686765-4689146     | 25.3911 | 3.29355 | 2.94660754  | 0.00065227 |
| TCONS_00090984 | 5:49552969-49555068   | 61.7675 | 6.0976  | 3.340534521 | 0.00065227 |
| TCONS_00058534 | 23:4039755-4042142    | 46.7196 | 4.41757 | 3.402703022 | 0.00065227 |
| TCONS_00054104 | 20:799718-804474      | 80.4489 | 4.79283 | 4.069123021 | 0.00065227 |
| TCONS_00105746 | 9:7826654-7829890     | 36.2668 | 0       | 5           | 0.00065227 |
| TCONS_00038920 | 2:4080590-4119075     | 30.7021 | 0       | 5           | 0.00065227 |
| TCONS_00028187 | 13:7140395-7143900    | 30.5135 | 0       | 5           | 0.00065227 |
| TCONS_00059983 | 26:4011189-4013183    | 25.6665 | 0       | 5           | 0.00065227 |
| TCONS_00112894 | Z:81435055-81436154   | 24.0587 | 0       | 5           | 0.00065227 |
| TCONS_00034407 | 17:10449648-10450259  | 21.2321 | 0       | 5           | 0.00065227 |
| TCONS_00023522 | 11:6516795-6522881    | 16.4437 | 0       | 5           | 0.00065227 |

**Table S2. Differential expression analysis of genes in breast muscle between hypertrophic and leaner broilers.**

| Gene     | WRR-FPKM | XH-FPKM | Log2(WRR/XH) | q value    | Significant | Regulation <sup>a</sup> |
|----------|----------|---------|--------------|------------|-------------|-------------------------|
| GBE1     | 11.5682  | 111.898 | -3.273947945 | 0.00016231 | yes         | Down                    |
| DNAJA4   | 4.35933  | 27.0897 | -2.635566092 | 0.00016231 | yes         | Down                    |
| HSPA8    | 75.6842  | 422.686 | -2.481522272 | 0.00016231 | yes         | Down                    |
| KLHL40   | 22.4113  | 115.289 | -2.362956627 | 0.00016231 | yes         | Down                    |
| NEXN     | 73.1294  | 372.192 | -2.347523616 | 0.00016231 | yes         | Down                    |
| ATF3     | 21.6204  | 101.446 | -2.230246861 | 0.00016231 | yes         | Down                    |
| BBS5     | 3.84471  | 16.7128 | -2.12000677  | 0.00016231 | yes         | Down                    |
| SEC11C   | 4.22006  | 18.1469 | -2.1043877   | 0.00016231 | yes         | Down                    |
| FHL2     | 3.07079  | 12.9763 | -2.079197319 | 0.00016231 | yes         | Down                    |
| HSP90B1  | 12.235   | 48.3257 | -1.981776529 | 0.00016231 | yes         | Down                    |
| P37NB    | 2.87202  | 10.7025 | -1.897810135 | 0.00016231 | yes         | Down                    |
| MAP3K7CL | 4.11341  | 14.8941 | -1.856334166 | 0.00016231 | yes         | Down                    |
| CCDC141  | 4.75283  | 16.6129 | -1.805445232 | 0.00016231 | yes         | Down                    |
| OSF-2    | 31.231   | 108.134 | -1.791769544 | 0.00016231 | yes         | Down                    |
| INSIG1   | 30.6869  | 105.105 | -1.776136485 | 0.00016231 | yes         | Down                    |
| DNAJB4   | 32.2587  | 109.333 | -1.76096871  | 0.00016231 | yes         | Down                    |
| MBSP     | 7.25562  | 24.0682 | -1.729957446 | 0.00016231 | yes         | Down                    |
| LUM      | 26.7256  | 86.9958 | -1.702723415 | 0.00016231 | yes         | Down                    |
| GADL1    | 20.5135  | 66.7093 | -1.701314238 | 0.00016231 | yes         | Down                    |
| GSTA     | 3.86603  | 11.983  | -1.632064401 | 0.00016231 | yes         | Down                    |
| SERPINE2 | 6.46527  | 19.8455 | -1.618029385 | 0.00016231 | yes         | Down                    |
| LETM1    | 10.3994  | 31.2408 | -1.586931104 | 0.00016231 | yes         | Down                    |
| HSPH1    | 3.64664  | 10.9266 | -1.583204864 | 0.00016231 | yes         | Down                    |
| HSP90AA1 | 456.504  | 1336.44 | -1.549695662 | 0.00016231 | yes         | Down                    |
| SUB1     | 6.3898   | 18.6081 | -1.542088074 | 0.00016231 | yes         | Down                    |
| Protein  | 13.4084  | 38.0796 | -1.505881231 | 0.00016231 | yes         | Down                    |
| FAM13B   | 8.2073   | 23.1809 | -1.497956986 | 0.00016231 | yes         | Down                    |
| ACSBG2   | 13.4884  | 38.0428 | -1.495904209 | 0.00016231 | yes         | Down                    |
| PNRC2    | 6.9864   | 19.5883 | -1.487371046 | 0.00016231 | yes         | Down                    |
| ECM2     | 7.94558  | 21.8542 | -1.459686127 | 0.00016231 | yes         | Down                    |
| ANXA5    | 14.9776  | 40.9834 | -1.45223321  | 0.00016231 | yes         | Down                    |
| C12orf5  | 13.9282  | 38.0312 | -1.449174637 | 0.00016231 | yes         | Down                    |
| CKAP4    | 6.53584  | 17.7989 | -1.445343512 | 0.00016231 | yes         | Down                    |
| PPIG     | 6.79152  | 18.4631 | -1.442838402 | 0.00016231 | yes         | Down                    |
| DPT      | 6.19382  | 16.7869 | -1.438434473 | 0.00016231 | yes         | Down                    |
| GIPC2    | 5.10963  | 13.8431 | -1.437876323 | 0.00016231 | yes         | Down                    |
| HERC4    | 8.51321  | 22.8434 | -1.424002273 | 0.00016231 | yes         | Down                    |
| OGN      | 15.0823  | 40.4188 | -1.422170038 | 0.00016231 | yes         | Down                    |
| TPPP     | 3.7568   | 10.0241 | -1.415896493 | 0.00016231 | yes         | Down                    |
| PDGFRL   | 4.28855  | 11.4279 | -1.413998471 | 0.00016231 | yes         | Down                    |
| DAP      | 4.30479  | 11.4128 | -1.406638018 | 0.00016231 | yes         | Down                    |
| HNRNPA3  | 6.80745  | 18.0362 | -1.405709027 | 0.00016231 | yes         | Down                    |
| IL18     | 4.12763  | 10.9085 | -1.402067175 | 0.00016231 | yes         | Down                    |
| ANXA1    | 7.4926   | 19.557  | -1.384146742 | 0.00016231 | yes         | Down                    |
| ACTC1    | 34.0831  | 88.9522 | -1.383973727 | 0.00016231 | yes         | Down                    |
| ATRX     | 6.13736  | 15.9346 | -1.376472689 | 0.00016231 | yes         | Down                    |
| PSIP1    | 7.63403  | 19.6797 | -1.366191467 | 0.00016231 | yes         | Down                    |
| GOLIM4   | 6.88334  | 17.7087 | -1.363277629 | 0.00016231 | yes         | Down                    |
| HSPA5    | 13.7934  | 35.2541 | -1.353812933 | 0.00016231 | yes         | Down                    |

|          |         |         |              |             |     |      |
|----------|---------|---------|--------------|-------------|-----|------|
| GOLGA4   | 5.28505 | 13.4586 | -1.348539319 | 0.00016231  | yes | Down |
| TRIP11   | 4.70797 | 11.8021 | -1.325866555 | 0.00016231  | yes | Down |
| NOP58    | 6.42281 | 16.0813 | -1.324107513 | 0.00016231  | yes | Down |
| RCN1     | 5.73383 | 14.3278 | -1.321246068 | 0.00016231  | yes | Down |
| RANBP1   | 4.86426 | 12.154  | -1.321138947 | 0.000721449 | yes | Down |
| LRRFIP2  | 22.1577 | 55.09   | -1.313982327 | 0.00016231  | yes | Down |
| CCDC127  | 12.0349 | 29.7917 | -1.307686296 | 0.00016231  | yes | Down |
| GATM     | 30.2175 | 74.2115 | -1.296258462 | 0.00016231  | yes | Down |
| PDP1     | 9.34808 | 22.8925 | -1.292133037 | 0.00016231  | yes | Down |
| STX2     | 6.33642 | 15.4706 | -1.28778928  | 0.000850638 | yes | Down |
| BMS1     | 4.28697 | 10.4532 | -1.28591443  | 0.00016231  | yes | Down |
| XIRP1    | 55.4534 | 133.685 | -1.269489774 | 0.00016231  | yes | Down |
| ASNS     | 15.2846 | 36.7465 | -1.265528047 | 0.00016231  | yes | Down |
| HEBP2    | 4.21146 | 10.0259 | -1.251339381 | 0.00016231  | yes | Down |
| FGL2     | 11.3225 | 26.6764 | -1.236371448 | 0.00016231  | yes | Down |
| EIF1AY   | 45.342  | 106.04  | -1.225688642 | 0.00016231  | yes | Down |
| NPM1     | 51.3031 | 119.934 | -1.225122797 | 0.00016231  | yes | Down |
| avenaII  | 9.35469 | 21.8656 | -1.224901186 | 0.00016231  | yes | Down |
| DCUN1D5  | 14.6026 | 34.1085 | -1.223906046 | 0.00016231  | yes | Down |
| XPO1     | 15.2124 | 35.4973 | -1.222461515 | 0.00016231  | yes | Down |
| SLC25A25 | 4.46225 | 10.4111 | -1.222279258 | 0.00016231  | yes | Down |
| ABRA     | 68.5353 | 159.453 | -1.218212078 | 0.00016231  | yes | Down |
| FRA10AC1 | 7.19846 | 16.6971 | -1.213837351 | 0.00016231  | yes | Down |
| OC3      | 12.4873 | 28.9545 | -1.213326012 | 0.00016231  | yes | Down |
| AOX1     | 9.66584 | 22.2846 | -1.205080046 | 0.00016231  | yes | Down |
| DCN      | 93.3672 | 214.873 | -1.202496488 | 0.00016231  | yes | Down |
| SPCS3    | 17.3236 | 39.5436 | -1.190705452 | 0.00016231  | yes | Down |
| RAP1B    | 4.66868 | 10.6201 | -1.185710739 | 0.00016231  | yes | Down |
| EMILIN2  | 6.47564 | 14.6395 | -1.176771591 | 0.00016231  | yes | Down |
| SMC3     | 6.5056  | 14.6922 | -1.175296415 | 0.00016231  | yes | Down |
| CCDC25   | 20.8343 | 47.0206 | -1.17433232  | 0.00016231  | yes | Down |
| BOD1L1   | 4.69206 | 10.5814 | -1.173237153 | 0.00016231  | yes | Down |
| SEL1L    | 5.81898 | 13.1144 | -1.172313611 | 0.00016231  | yes | Down |
| MYLK4    | 74.76   | 168.484 | -1.172273119 | 0.00016231  | yes | Down |
| ABI3BP   | 10.8021 | 24.255  | -1.16697037  | 0.00016231  | yes | Down |
| hsp70    | 297.179 | 665.097 | -1.162232591 | 0.00016231  | yes | Down |
| ABLIM2   | 5.11152 | 11.419  | -1.159612044 | 0.00016231  | yes | Down |
| FAM129A  | 5.49809 | 12.1854 | -1.148151182 | 0.00016231  | yes | Down |
| DNAJC2   | 32.1435 | 71.186  | -1.147066509 | 0.00016231  | yes | Down |
| GNB1     | 8.30324 | 18.3398 | -1.143231602 | 0.00016231  | yes | Down |
| LMNB2    | 8.63363 | 19.0617 | -1.142637619 | 0.00016231  | yes | Down |
| ARL5B    | 4.65906 | 10.2645 | -1.139552538 | 0.00016231  | yes | Down |
| ADAL     | 4.82513 | 10.6203 | -1.138184802 | 0.00016231  | yes | Down |
| LEPROT   | 4.74396 | 10.4079 | -1.133515255 | 0.00016231  | yes | Down |
| CDKN1A   | 12.577  | 27.5674 | -1.132175371 | 0.00016231  | yes | Down |
| UBE2V2   | 12.8914 | 28.1908 | -1.128815471 | 0.00016231  | yes | Down |
| SEPT7    | 30.9083 | 67.4513 | -1.125851943 | 0.00016231  | yes | Down |
| ARHGAP5  | 9.52823 | 20.7222 | -1.120897033 | 0.00016231  | yes | Down |
| CETN2    | 9.09383 | 19.6713 | -1.113132363 | 0.00016231  | yes | Down |
| MFAP5    | 14.6307 | 31.4861 | -1.105716274 | 0.00016231  | yes | Down |
| ITGA6    | 10.0755 | 21.6048 | -1.100500441 | 0.00016231  | yes | Down |
| FAM133B  | 25.6715 | 55.0215 | -1.099827875 | 0.00016231  | yes | Down |
| LRPAP1   | 15.3615 | 32.8848 | -1.098101799 | 0.00016231  | yes | Down |
| EXOC1    | 6.03515 | 12.9023 | -1.096166734 | 0.00016231  | yes | Down |



|           |         |         |              |            |     |      |
|-----------|---------|---------|--------------|------------|-----|------|
| PGD       | 5.26557 | 11.2304 | -1.092747697 | 0.00016231 | yes | Down |
| ND6       | 70.4743 | 150.145 | -1.091187284 | 0.00016231 | yes | Down |
| COL5A2    | 22.4483 | 47.8186 | -1.090965698 | 0.00016231 | yes | Down |
| SEC62     | 6.27578 | 13.3639 | -1.090474408 | 0.00016231 | yes | Down |
| RNF7      | 20.2362 | 43.053  | -1.089175367 | 0.00016231 | yes | Down |
| COL1A2    | 124.212 | 262.943 | -1.081945533 | 0.00016231 | yes | Down |
| COL6A2    | 75.0892 | 158.899 | -1.081432719 | 0.00016231 | yes | Down |
| VAPB      | 11.1896 | 23.6654 | -1.080620843 | 0.00016231 | yes | Down |
| ERCC5     | 5.79791 | 12.2514 | -1.079341775 | 0.00016231 | yes | Down |
| SERPINF1  | 66.3539 | 140.206 | -1.079294921 | 0.00016231 | yes | Down |
| PODN      | 39.1305 | 82.4682 | -1.075544374 | 0.00016231 | yes | Down |
| CD99      | 33.7427 | 70.8671 | -1.070540594 | 0.00016231 | yes | Down |
| ROCK2     | 50.0104 | 104.56  | -1.064030997 | 0.00016231 | yes | Down |
| PKD2L2    | 13.1313 | 27.3409 | -1.058050984 | 0.00016231 | yes | Down |
| HNRNPM    | 8.13862 | 16.9291 | -1.056649183 | 0.00016231 | yes | Down |
| UFM1      | 10.1407 | 21.0747 | -1.055354851 | 0.00016231 | yes | Down |
| APP       | 9.48344 | 19.6984 | -1.054596073 | 0.00016231 | yes | Down |
| FBN1      | 26.6076 | 54.9951 | -1.047464696 | 0.00016231 | yes | Down |
| UBXN2A    | 32.3066 | 66.7242 | -1.046381176 | 0.00016231 | yes | Down |
| DDX24     | 5.9493  | 12.2839 | -1.045976838 | 0.00016231 | yes | Down |
| VPS13A    | 10.4392 | 21.5342 | -1.044618572 | 0.00016231 | yes | Down |
| F13A1     | 8.57505 | 17.6821 | -1.044072637 | 0.00016231 | yes | Down |
| SSB       | 16.4135 | 33.6963 | -1.037707275 | 0.00016231 | yes | Down |
| TNNC1     | 4059.89 | 8301.71 | -1.031967897 | 0.00016231 | yes | Down |
| MBP       | 8.87528 | 18.127  | -1.03027564  | 0.00016231 | yes | Down |
| CALM      | 927.015 | 1882    | -1.02160204  | 0.00016231 | yes | Down |
| SLC35F5   | 8.15139 | 16.5146 | -1.018624028 | 0.00016231 | yes | Down |
| SUV420H1  | 7.31529 | 14.8195 | -1.01850981  | 0.00016231 | yes | Down |
| AFAP1     | 5.24484 | 10.6248 | -1.018465017 | 0.00016231 | yes | Down |
| SRSF4     | 5.14871 | 10.426  | -1.017902847 | 0.00016231 | yes | Down |
| HNRNPH3   | 17.512  | 35.4095 | -1.015792613 | 0.00016231 | yes | Down |
| GSTA3     | 5.00835 | 10.1217 | -1.015044328 | 0.00016231 | yes | Down |
| KDELC2    | 6.62525 | 13.3644 | -1.012348269 | 0.00016231 | yes | Down |
| EBNA1BP2  | 9.43622 | 18.9794 | -1.008153425 | 0.00016231 | yes | Down |
| VASH2     | 7.33012 | 14.702  | -1.004103705 | 0.00016231 | yes | Down |
| FKBP14    | 7.40675 | 14.8415 | -1.002724362 | 0.00016231 | yes | Down |
| HSPD1     | 37.1698 | 74.4062 | -1.001291915 | 0.00016231 | yes | Down |
| TMCC1     | 25.5803 | 12.7855 | 1.000524603  | 0.00016231 | yes | Up   |
| SIRT6     | 12.3673 | 6.17919 | 1.001040929  | 0.00016231 | yes | Up   |
| CERS1     | 15.3619 | 7.67398 | 1.001309753  | 0.00016231 | yes | Up   |
| PBDC1     | 72.8786 | 36.3944 | 1.001778765  | 0.00016231 | yes | Up   |
| FLII      | 74.3005 | 37.0582 | 1.003579111  | 0.00016231 | yes | Up   |
| KLF10     | 27.7166 | 13.8179 | 1.004211916  | 0.00016231 | yes | Up   |
| MIEF2     | 21.1603 | 10.5363 | 1.005991752  | 0.00016231 | yes | Up   |
| NT5DC3    | 13.5258 | 6.73235 | 1.00653184   | 0.00016231 | yes | Up   |
| ARHGEF10L | 10.3729 | 5.1618  | 1.006873143  | 0.00016231 | yes | Up   |
| PCIF1     | 18.6351 | 9.26413 | 1.008295158  | 0.00016231 | yes | Up   |
| ATP13A1   | 11.325  | 5.61858 | 1.011233585  | 0.00016231 | yes | Up   |
| CDC34     | 14.8006 | 7.33206 | 1.013365165  | 0.00016231 | yes | Up   |
| KLHL21    | 78.884  | 39.0583 | 1.014103551  | 0.00016231 | yes | Up   |
| TNFAIP8L3 | 29.1548 | 14.4299 | 1.014672124  | 0.00016231 | yes | Up   |
| HSCB      | 16.0144 | 7.92254 | 1.015334803  | 0.00016231 | yes | Up   |
| DPP7      | 32.7715 | 16.2107 | 1.015495319  | 0.00016231 | yes | Up   |
| IDH3G     | 71.7539 | 35.4835 | 1.015908928  | 0.00016231 | yes | Up   |

|          |         |         |             |             |     |    |
|----------|---------|---------|-------------|-------------|-----|----|
| PSAP     | 243.581 | 120.376 | 1.01685382  | 0.00016231  | yes | Up |
| MAN2A2   | 33.9835 | 16.7863 | 1.017550175 | 0.00016231  | yes | Up |
| DDX54    | 13.7061 | 6.76871 | 1.017865306 | 0.00016231  | yes | Up |
| HK2      | 22.7912 | 11.2475 | 1.01887252  | 0.00016231  | yes | Up |
| SSR2     | 94.7838 | 46.7296 | 1.020303814 | 0.00016231  | yes | Up |
| CLTB     | 131.538 | 64.8079 | 1.021238048 | 0.00016231  | yes | Up |
| SCN4A    | 46.0901 | 22.6725 | 1.023513418 | 0.00016231  | yes | Up |
| HAGH     | 85.1495 | 41.8761 | 1.023870971 | 0.00016231  | yes | Up |
| NUMA1    | 58.2776 | 28.634  | 1.025212245 | 0.00016231  | yes | Up |
| MVP      | 10.588  | 5.19693 | 1.026698568 | 0.00016231  | yes | Up |
| RPRD2    | 23.7272 | 11.6408 | 1.027351652 | 0.00016231  | yes | Up |
| skTmod   | 10.064  | 4.93525 | 1.028008755 | 0.000310285 | yes | Up |
| GYLTL1B  | 18.1728 | 8.90892 | 1.028458268 | 0.00016231  | yes | Up |
| CISH     | 114.328 | 55.985  | 1.030066532 | 0.00016231  | yes | Up |
| UHRF1BP1 | 22.0843 | 10.793  | 1.032925175 | 0.00016231  | yes | Up |
| CRIP2    | 11.7934 | 5.76349 | 1.032965118 | 0.00016231  | yes | Up |
| ETV3     | 30.0884 | 14.7028 | 1.033116463 | 0.00016231  | yes | Up |
| PRDX6    | 216.177 | 105.632 | 1.033166088 | 0.00016231  | yes | Up |
| USP39    | 11.4669 | 5.60108 | 1.033698482 | 0.00016231  | yes | Up |
| YBX3     | 892.248 | 435.59  | 1.034473928 | 0.00016231  | yes | Up |
| RPL9     | 1060.11 | 517.483 | 1.034630597 | 0.00016231  | yes | Up |
| FOXO1    | 18.5233 | 9.02954 | 1.036616745 | 0.00016231  | yes | Up |
| NAA40    | 24.4644 | 11.9225 | 1.036997118 | 0.00016231  | yes | Up |
| ROR1     | 20.7457 | 10.1095 | 1.037100692 | 0.00016231  | yes | Up |
| TRIB1    | 19.8524 | 9.6717  | 1.037472028 | 0.00016231  | yes | Up |
| RPS10    | 1434.76 | 698.664 | 1.03813872  | 0.00016231  | yes | Up |
| ENOPH1   | 18.9813 | 9.24187 | 1.038322102 | 0.00016231  | yes | Up |
| AMFR     | 73.1764 | 35.5885 | 1.039967316 | 0.00016231  | yes | Up |
| RHPN1    | 23.1758 | 11.2562 | 1.041899272 | 0.00016231  | yes | Up |
| SYDE2    | 13.1015 | 6.3583  | 1.043019003 | 0.00016231  | yes | Up |
| EIF4E3   | 11.3358 | 5.50082 | 1.043167609 | 0.00016231  | yes | Up |
| GOT1     | 140.404 | 68.0002 | 1.045973143 | 0.00016231  | yes | Up |
| SYPL2    | 439.239 | 212.487 | 1.047631577 | 0.00016231  | yes | Up |
| PEF1     | 16.9809 | 8.21371 | 1.047807008 | 0.00016231  | yes | Up |
| ERAL1    | 13.2013 | 6.38332 | 1.048301128 | 0.00016231  | yes | Up |
| UTS2R    | 16.7144 | 8.06601 | 1.051164468 | 0.00016231  | yes | Up |
| MAF1     | 117.128 | 56.5044 | 1.05165088  | 0.00016231  | yes | Up |
| MED19    | 42.6245 | 20.5396 | 1.053274825 | 0.00016231  | yes | Up |
| HINT2    | 12.0982 | 5.82448 | 1.054591257 | 0.000451409 | yes | Up |
| RPL35A   | 349.298 | 168.063 | 1.05545624  | 0.00016231  | yes | Up |
| TMED4    | 233.132 | 112.058 | 1.056901395 | 0.00016231  | yes | Up |
| COX6A1   | 144.487 | 69.4144 | 1.057632809 | 0.00016231  | yes | Up |
| MED28    | 28.1675 | 13.4958 | 1.061521024 | 0.00016231  | yes | Up |
| WDR24    | 24.2933 | 11.6382 | 1.061690535 | 0.00016231  | yes | Up |
| POMP     | 144.085 | 68.997  | 1.062314611 | 0.00016231  | yes | Up |
| SCN4B    | 12.3897 | 5.93072 | 1.062862089 | 0.00016231  | yes | Up |
| MPI      | 45.739  | 21.8787 | 1.063897806 | 0.00016231  | yes | Up |
| ABCC5    | 18.0863 | 8.62963 | 1.06752669  | 0.00016231  | yes | Up |
| USP31    | 12.5615 | 5.98806 | 1.068848168 | 0.00016231  | yes | Up |
| SYNGR1   | 55.8315 | 26.573  | 1.071118205 | 0.00016231  | yes | Up |
| CA9      | 36.243  | 17.1928 | 1.075897859 | 0.00016231  | yes | Up |
| RPS11    | 574.231 | 272.224 | 1.076836953 | 0.00016231  | yes | Up |
| BRD2     | 45.2098 | 21.383  | 1.08017126  | 0.00016231  | yes | Up |
| ME3      | 10.1785 | 4.81228 | 1.080732475 | 0.00016231  | yes | Up |

|          |         |         |             |            |     |    |
|----------|---------|---------|-------------|------------|-----|----|
| ALDH6A1  | 43.5612 | 20.5924 | 1.080931714 | 0.00016231 | yes | Up |
| CSNK1G2  | 50.0588 | 23.6306 | 1.082967446 | 0.00016231 | yes | Up |
| OGDH     | 168.901 | 79.7197 | 1.083169684 | 0.00016231 | yes | Up |
| SPSB3    | 21.7994 | 10.285  | 1.083746633 | 0.00016231 | yes | Up |
| ADCY9    | 96.6021 | 45.5592 | 1.084312137 | 0.00016231 | yes | Up |
| ANAPC16  | 96.833  | 45.6373 | 1.08528535  | 0.00016231 | yes | Up |
| FCGBP    | 22.04   | 10.3811 | 1.086164902 | 0.00016231 | yes | Up |
| ALDH3A2  | 16.4885 | 7.76062 | 1.087216339 | 0.00016231 | yes | Up |
| H3F3C    | 169.501 | 79.7675 | 1.087420817 | 0.00016231 | yes | Up |
| STIM1    | 16.2788 | 7.65704 | 1.088135656 | 0.00016231 | yes | Up |
| MRPS21   | 80.7309 | 37.9009 | 1.090888868 | 0.00016231 | yes | Up |
| PM20D2   | 167.924 | 78.7972 | 1.091592167 | 0.00016231 | yes | Up |
| ENG      | 23.5023 | 11.025  | 1.092023294 | 0.00016231 | yes | Up |
| CDK9     | 13.5511 | 6.35482 | 1.092486799 | 0.00016231 | yes | Up |
| TAF11    | 13.4895 | 6.31715 | 1.09449114  | 0.00016231 | yes | Up |
| FNBP4    | 15.6086 | 7.30451 | 1.095481739 | 0.00016231 | yes | Up |
| RAMP1    | 24.9474 | 11.6668 | 1.096480558 | 0.00016231 | yes | Up |
| PTGDS    | 184.281 | 86.0167 | 1.099218643 | 0.00016231 | yes | Up |
| UBQLN4   | 15.3718 | 7.17266 | 1.09970596  | 0.00016231 | yes | Up |
| UCP      | 661.692 | 308.624 | 1.10030958  | 0.00016231 | yes | Up |
| PSMD13   | 118.944 | 55.4746 | 1.100383233 | 0.00016231 | yes | Up |
| ABHD17A  | 34.854  | 16.2511 | 1.100786861 | 0.00016231 | yes | Up |
| ARHGEF11 | 17.761  | 8.27655 | 1.101611388 | 0.00016231 | yes | Up |
| ARID5A   | 18.9821 | 8.8429  | 1.102048128 | 0.00016231 | yes | Up |
| OTUD1    | 54.4932 | 25.3752 | 1.102657019 | 0.00016231 | yes | Up |
| ASB11    | 42.2596 | 19.676  | 1.102842152 | 0.00016231 | yes | Up |
| MFG8     | 35.5333 | 16.4831 | 1.108184081 | 0.00016231 | yes | Up |
| HBXIP    | 34.4428 | 15.9749 | 1.10839553  | 0.00016231 | yes | Up |
| KLF9     | 92.8131 | 43.0242 | 1.109180081 | 0.00016231 | yes | Up |
| PTP4A3   | 759.374 | 351.829 | 1.1099362   | 0.00016231 | yes | Up |
| EMC1     | 21.7187 | 10.0617 | 1.110063671 | 0.00016231 | yes | Up |
| DUSP8    | 17.9613 | 8.31334 | 1.111391652 | 0.00016231 | yes | Up |
| PTRH2    | 44.7112 | 20.6791 | 1.112462869 | 0.00016231 | yes | Up |
| TBC1D16  | 11.7223 | 5.41964 | 1.112986736 | 0.00016231 | yes | Up |
| RPL12    | 597.593 | 276.157 | 1.113674552 | 0.00016231 | yes | Up |
| RPS6KB2  | 26.2366 | 12.1107 | 1.115298518 | 0.00016231 | yes | Up |
| SMIM12   | 16.3472 | 7.53423 | 1.117511567 | 0.00016231 | yes | Up |
| DAP3     | 81.0325 | 37.3306 | 1.118141954 | 0.00016231 | yes | Up |
| PPM1J    | 15.0543 | 6.9315  | 1.118936131 | 0.00016231 | yes | Up |
| PLBD2    | 31.1769 | 14.3491 | 1.119517233 | 0.00016231 | yes | Up |
| RBM24    | 180.272 | 82.9118 | 1.120525988 | 0.00016231 | yes | Up |
| SBF1     | 21.0585 | 9.6787  | 1.121517487 | 0.00016231 | yes | Up |
| RPS4X    | 617.635 | 283.237 | 1.124744768 | 0.00016231 | yes | Up |
| TCF25    | 35.9336 | 16.4685 | 1.125624323 | 0.00016231 | yes | Up |
| CTSB     | 121.327 | 55.3581 | 1.132034309 | 0.00016231 | yes | Up |
| HINTW    | 128.513 | 58.5894 | 1.133202725 | 0.00016231 | yes | Up |
| ST3GAL3  | 27.8428 | 12.685  | 1.134180783 | 0.00016231 | yes | Up |
| COX5A    | 31.1833 | 14.2001 | 1.134872521 | 0.00016231 | yes | Up |
| MN1      | 51.1796 | 23.2701 | 1.137091461 | 0.00016231 | yes | Up |
| SPCS1    | 47.9419 | 21.7914 | 1.1375282   | 0.00016231 | yes | Up |
| FOXO3    | 237.178 | 107.708 | 1.138844786 | 0.00016231 | yes | Up |
| CCDC86   | 19.1264 | 8.67313 | 1.140940714 | 0.00016231 | yes | Up |
| PRKAB2   | 195.695 | 88.7356 | 1.141021972 | 0.00016231 | yes | Up |
| AHCYL2   | 26.693  | 12.0942 | 1.142146116 | 0.00016231 | yes | Up |

|          |         |         |             |             |     |    |
|----------|---------|---------|-------------|-------------|-----|----|
| RBX1     | 152.073 | 68.8918 | 1.142359852 | 0.00016231  | yes | Up |
| ARHGAP35 | 21.5276 | 9.73655 | 1.144704919 | 0.00016231  | yes | Up |
| MAPRE2   | 88.9765 | 40.2294 | 1.145174128 | 0.00016231  | yes | Up |
| FAM134A  | 41.159  | 18.6002 | 1.145889797 | 0.00016231  | yes | Up |
| PRKAB1   | 22.2788 | 10.062  | 1.146754432 | 0.00016231  | yes | Up |
| FBXO48   | 11.4122 | 5.15348 | 1.146958058 | 0.00016231  | yes | Up |
| C19orf70 | 20.8004 | 9.39152 | 1.147180693 | 0.00016231  | yes | Up |
| CDK2AP1  | 41.3719 | 18.6736 | 1.14765113  | 0.00016231  | yes | Up |
| BCL2L1   | 23.7219 | 10.7042 | 1.14804259  | 0.00016231  | yes | Up |
| PIIB     | 147.059 | 66.3263 | 1.148742127 | 0.00016231  | yes | Up |
| SEMA7A   | 23.4429 | 10.57   | 1.149175672 | 0.00016231  | yes | Up |
| FDFT1    | 27.6235 | 12.4458 | 1.150237158 | 0.00016231  | yes | Up |
| SCYL3    | 44.2791 | 19.9482 | 1.150367326 | 0.00016231  | yes | Up |
| SMCR8    | 68.3574 | 30.7539 | 1.15232815  | 0.00016231  | yes | Up |
| EGFL7    | 10.3914 | 4.67346 | 1.152827086 | 0.00016231  | yes | Up |
| ABCA3    | 36.9528 | 16.5846 | 1.155839468 | 0.00016231  | yes | Up |
| MAP1S    | 17.9886 | 8.07197 | 1.156090193 | 0.00016231  | yes | Up |
| ASB4     | 79.1743 | 35.4876 | 1.157717198 | 0.00016231  | yes | Up |
| PIGT     | 18.0359 | 8.07837 | 1.158735286 | 0.00016231  | yes | Up |
| TGIF1    | 11.6257 | 5.20682 | 1.158843147 | 0.00016231  | yes | Up |
| RAB40B   | 11.8084 | 5.28659 | 1.159404149 | 0.00016231  | yes | Up |
| TAZ      | 23.2457 | 10.4022 | 1.160075189 | 0.00016231  | yes | Up |
| XPNPEP3  | 14.4156 | 6.44948 | 1.160376135 | 0.00016231  | yes | Up |
| DTX2     | 22.0623 | 9.87017 | 1.160436362 | 0.00016231  | yes | Up |
| DBNL     | 14.2902 | 6.38924 | 1.16130987  | 0.00016231  | yes | Up |
| SIRT2    | 23.9712 | 10.6962 | 1.164203786 | 0.00016231  | yes | Up |
| RNF214   | 14.8695 | 6.63188 | 1.164866329 | 0.00016231  | yes | Up |
| GNB2L1   | 658.058 | 293.456 | 1.16507054  | 0.00016231  | yes | Up |
| CHRND    | 37.5264 | 16.7331 | 1.16520115  | 0.00016231  | yes | Up |
| FAM117A  | 27.7614 | 12.3725 | 1.165943282 | 0.00016231  | yes | Up |
| OTUD5    | 56.5973 | 25.2206 | 1.166130632 | 0.00016231  | yes | Up |
| FOS      | 13.2273 | 5.88745 | 1.167803796 | 0.00016231  | yes | Up |
| rad9     | 108.006 | 48.0542 | 1.168377025 | 0.00016231  | yes | Up |
| ZBTB42   | 15.7169 | 6.99129 | 1.168686104 | 0.00016231  | yes | Up |
| DCPS     | 19.5024 | 8.64645 | 1.173471848 | 0.00016231  | yes | Up |
| TINAGL1  | 25.1069 | 11.126  | 1.174148896 | 0.00016231  | yes | Up |
| NAIF1    | 30.984  | 13.7268 | 1.174528064 | 0.00016231  | yes | Up |
| NXN      | 14.3391 | 6.33233 | 1.179146129 | 0.000850638 | yes | Up |
| RAI2     | 24.9875 | 11.0344 | 1.179198382 | 0.00016231  | yes | Up |
| MYO18A   | 49.0793 | 21.6669 | 1.179621918 | 0.00016231  | yes | Up |
| ERI3     | 12.8404 | 5.66264 | 1.181143426 | 0.00016231  | yes | Up |
| RBFOX2   | 175.251 | 77.2247 | 1.18228841  | 0.00016231  | yes | Up |
| MAP2K2   | 22.2612 | 9.79286 | 1.184729199 | 0.00016231  | yes | Up |
| HS6ST2   | 15.2445 | 6.70497 | 1.18498605  | 0.00016231  | yes | Up |
| LINGO1   | 224.286 | 98.5926 | 1.185788297 | 0.00016231  | yes | Up |
| PDRG1    | 60.3505 | 26.4978 | 1.18749314  | 0.00016231  | yes | Up |
| CUTA     | 96.0161 | 42.1552 | 1.187565734 | 0.00016231  | yes | Up |
| B2M      | 584.889 | 256.284 | 1.190419444 | 0.00016231  | yes | Up |
| PWWP2B   | 28.7707 | 12.5915 | 1.192150164 | 0.00016231  | yes | Up |
| YBEY     | 13.7813 | 6.01777 | 1.195411112 | 0.00016231  | yes | Up |
| PEX6     | 17.6695 | 7.71445 | 1.195626007 | 0.00016231  | yes | Up |
| CASKIN2  | 13.1438 | 5.73164 | 1.19736253  | 0.00016231  | yes | Up |
| SLC25A29 | 12.731  | 5.55104 | 1.197515751 | 0.00016231  | yes | Up |
| SNX17    | 37.7933 | 16.4641 | 1.198806846 | 0.00016231  | yes | Up |

|            |         |         |             |            |     |    |
|------------|---------|---------|-------------|------------|-----|----|
| CTK-1      | 16.8207 | 7.32536 | 1.199266178 | 0.00016231 | yes | Up |
| DDX28      | 11.6166 | 5.05761 | 1.199660178 | 0.00016231 | yes | Up |
| GPX3       | 1352.74 | 588.922 | 1.199736103 | 0.00016231 | yes | Up |
| C1orf131   | 20.3244 | 8.83984 | 1.201120601 | 0.00016231 | yes | Up |
| SNRPC      | 115.74  | 50.3341 | 1.201279526 | 0.00016231 | yes | Up |
| OTUB1      | 19.629  | 8.51915 | 1.204205279 | 0.00016231 | yes | Up |
| MARS       | 50.8745 | 22.079  | 1.204267879 | 0.00016231 | yes | Up |
| NDUFS7     | 275.99  | 119.757 | 1.204506008 | 0.00016231 | yes | Up |
| FRS3       | 10.8401 | 4.70092 | 1.205363031 | 0.00016231 | yes | Up |
| NDUFS5     | 48.5402 | 21.0283 | 1.20684783  | 0.00016231 | yes | Up |
| CTSD       | 113.83  | 49.2763 | 1.207914993 | 0.00016231 | yes | Up |
| ILK        | 19.9585 | 8.63833 | 1.208178961 | 0.00016231 | yes | Up |
| RGS5       | 100.758 | 43.6087 | 1.208206502 | 0.00016231 | yes | Up |
| NDUFA8     | 60.7627 | 26.2906 | 1.20863891  | 0.00016231 | yes | Up |
| FLOT2      | 23.3419 | 10.0952 | 1.209252507 | 0.00016231 | yes | Up |
| ACOT11     | 13.0094 | 5.62528 | 1.209557612 | 0.00016231 | yes | Up |
| DCTN2      | 16.1644 | 6.98881 | 1.209701227 | 0.00016231 | yes | Up |
| HGS        | 22.5387 | 9.74322 | 1.209933758 | 0.00016231 | yes | Up |
| ACOT8      | 12.6889 | 5.47979 | 1.211374496 | 0.00016231 | yes | Up |
| C15orf59   | 11.5489 | 4.98148 | 1.213109109 | 0.00016231 | yes | Up |
| FARSA      | 27.2028 | 11.714  | 1.215521357 | 0.00016231 | yes | Up |
| CCNL1      | 30.6763 | 13.2045 | 1.21609481  | 0.00016231 | yes | Up |
| KANSL1     | 13.1302 | 5.64766 | 1.217163748 | 0.00016231 | yes | Up |
| ENPP4      | 21.8359 | 9.39092 | 1.217363589 | 0.00016231 | yes | Up |
| FSD1       | 15.1469 | 6.49751 | 1.221063704 | 0.00016231 | yes | Up |
| CCDC101    | 67.6035 | 28.9681 | 1.222632878 | 0.00016231 | yes | Up |
| ST6GALNAC6 | 42.782  | 18.278  | 1.22689571  | 0.00016231 | yes | Up |
| QPCTL      | 12.8964 | 5.50136 | 1.229108178 | 0.00016231 | yes | Up |
| MTO1       | 25.8033 | 10.9917 | 1.231141051 | 0.00016231 | yes | Up |
| DYSF       | 34.9633 | 14.8838 | 1.23209845  | 0.00016231 | yes | Up |
| RALY       | 61.0258 | 25.974  | 1.232351096 | 0.00016231 | yes | Up |
| NPRL2      | 23.8268 | 10.1271 | 1.234364104 | 0.00016231 | yes | Up |
| RXRA       | 58.7086 | 24.9276 | 1.235827865 | 0.00016231 | yes | Up |
| M2.        | 21.5471 | 9.13632 | 1.237808625 | 0.00016231 | yes | Up |
| NDUFB8     | 149.488 | 63.3688 | 1.238185077 | 0.00016231 | yes | Up |
| CD99L2     | 88.3846 | 37.4334 | 1.239468927 | 0.00016231 | yes | Up |
| NUDT16L1   | 118.968 | 50.2882 | 1.24228175  | 0.00016231 | yes | Up |
| THAP1      | 14.9125 | 6.30093 | 1.242885451 | 0.00016231 | yes | Up |
| POLR2H     | 28.0605 | 11.8498 | 1.243678006 | 0.00016231 | yes | Up |
| NDUFA2     | 132.967 | 56.1273 | 1.244293674 | 0.00016231 | yes | Up |
| ZDHHC5     | 10.5734 | 4.45897 | 1.245656968 | 0.00016231 | yes | Up |
| SCMH1      | 12.1055 | 5.09797 | 1.24766788  | 0.00016231 | yes | Up |
| SLC25A28   | 58.0104 | 24.4157 | 1.248502426 | 0.00016231 | yes | Up |
| AMOTL1     | 58.0717 | 24.3905 | 1.251515935 | 0.00016231 | yes | Up |
| MRPL51     | 23.0841 | 9.68782 | 1.252655521 | 0.00016231 | yes | Up |
| SPTB       | 54.5549 | 22.8743 | 1.253981187 | 0.00016231 | yes | Up |
| PSMC5      | 140.982 | 59.0581 | 1.255304129 | 0.00016231 | yes | Up |
| HTRA2      | 18.1934 | 7.60472 | 1.258448145 | 0.00016231 | yes | Up |
| IBA57      | 12.4955 | 5.22259 | 1.258571277 | 0.00016231 | yes | Up |
| APOA1      | 970.244 | 405.17  | 1.25982025  | 0.00016231 | yes | Up |
| MGST3      | 35.2217 | 14.6819 | 1.262425863 | 0.00016231 | yes | Up |
| RDH5       | 16.0303 | 6.67317 | 1.264357263 | 0.00016231 | yes | Up |
| POLR2E     | 87.5784 | 36.3957 | 1.266807081 | 0.00016231 | yes | Up |
| SNRB'      | 13.2467 | 5.49825 | 1.268588591 | 0.00016231 | yes | Up |

|            |         |         |             |            |     |    |
|------------|---------|---------|-------------|------------|-----|----|
| SP1        | 23.1637 | 9.61165 | 1.269009697 | 0.00016231 | yes | Up |
| ZBTB48     | 15.3015 | 6.34432 | 1.270135641 | 0.00016231 | yes | Up |
| FAM78A     | 25.2244 | 10.4459 | 1.271883155 | 0.00016231 | yes | Up |
| CSRP1      | 22.8377 | 9.45262 | 1.272631199 | 0.00016231 | yes | Up |
| DVL3       | 11.3959 | 4.71477 | 1.273255568 | 0.00016231 | yes | Up |
| TAGLN      | 19.8846 | 8.22572 | 1.273437672 | 0.00016231 | yes | Up |
| EEF2       | 836.945 | 346.008 | 1.274327424 | 0.00016231 | yes | Up |
| PTPMT1     | 39.0053 | 16.1252 | 1.274353115 | 0.00016231 | yes | Up |
| ATP5D      | 565.137 | 233.492 | 1.275227526 | 0.00016231 | yes | Up |
| THAP4      | 48.9376 | 20.1985 | 1.276695192 | 0.00016231 | yes | Up |
| LRRC47     | 14.9463 | 6.15396 | 1.280201414 | 0.00016231 | yes | Up |
| SDHC       | 604.309 | 248.737 | 1.280665302 | 0.00016231 | yes | Up |
| ALDH4A1    | 26.8845 | 11.0607 | 1.281331948 | 0.00016231 | yes | Up |
| STIP1      | 49.9394 | 20.5312 | 1.282360536 | 0.00016231 | yes | Up |
| BCAS2      | 50.0005 | 20.5513 | 1.282712865 | 0.00016231 | yes | Up |
| DIRC2      | 52.0867 | 21.3661 | 1.285591443 | 0.00016231 | yes | Up |
| SUN2       | 16.148  | 6.62376 | 1.285633186 | 0.00016231 | yes | Up |
| MYLK2      | 261.892 | 107.399 | 1.28599143  | 0.00016231 | yes | Up |
| CHCHD10    | 247.353 | 101.371 | 1.286926409 | 0.00016231 | yes | Up |
| ATP5B      | 684.852 | 280.598 | 1.287287522 | 0.00016231 | yes | Up |
| ZNF319     | 12.6157 | 5.16003 | 1.2897689   | 0.00016231 | yes | Up |
| SCN2B      | 25.0519 | 10.235  | 1.291408923 | 0.00016231 | yes | Up |
| ST6GALNAC4 | 81.1566 | 33.143  | 1.292004229 | 0.00016231 | yes | Up |
| MMP15      | 75.2329 | 30.7133 | 1.292500171 | 0.00016231 | yes | Up |
| FAM173A    | 42.75   | 17.4522 | 1.292515508 | 0.00016231 | yes | Up |
| ZNF335     | 27.9512 | 11.3888 | 1.295294479 | 0.00016231 | yes | Up |
| MVD        | 13.2565 | 5.39813 | 1.296168297 | 0.00016231 | yes | Up |
| RPL15      | 224.742 | 91.4757 | 1.296809306 | 0.00016231 | yes | Up |
| RPL18A     | 555.294 | 226.013 | 1.29684605  | 0.00016231 | yes | Up |
| CSTF2      | 11.2024 | 4.55878 | 1.297088154 | 0.00016231 | yes | Up |
| LAMTOR2    | 132.238 | 53.7964 | 1.297555273 | 0.00016231 | yes | Up |
| LIMD1      | 23.6402 | 9.6134  | 1.298123572 | 0.00016231 | yes | Up |
| NCOA1      | 11.8492 | 4.81143 | 1.300252014 | 0.00016231 | yes | Up |
| SERINC2    | 13.3439 | 5.41797 | 1.300356072 | 0.00016231 | yes | Up |
| JADE2      | 33.3321 | 13.5182 | 1.302009149 | 0.00016231 | yes | Up |
| TRMT61B    | 10.1753 | 4.12603 | 1.302245114 | 0.00016231 | yes | Up |
| RPLP0      | 516.896 | 209.418 | 1.303488587 | 0.00016231 | yes | Up |
| SARS       | 69.8154 | 28.2724 | 1.304150947 | 0.00016231 | yes | Up |
| FAM96B     | 40.3215 | 16.3077 | 1.305995987 | 0.00016231 | yes | Up |
| C1H21ORF59 | 15.6074 | 6.30838 | 1.30688875  | 0.00016231 | yes | Up |
| FHL1       | 34.3607 | 13.886  | 1.307128351 | 0.00016231 | yes | Up |
| TMEM52     | 61.1805 | 24.723  | 1.30721808  | 0.00016231 | yes | Up |
| METTL11A   | 42.2786 | 17.0532 | 1.309885121 | 0.00016231 | yes | Up |
| JUN        | 93.5169 | 37.6863 | 1.311186947 | 0.00016231 | yes | Up |
| DNTTIP1    | 67.2243 | 27.0659 | 1.312506466 | 0.00016231 | yes | Up |
| POLH       | 14.8742 | 5.97143 | 1.316663711 | 0.00016231 | yes | Up |
| PSMF1      | 46.5688 | 18.6541 | 1.31987095  | 0.00016231 | yes | Up |
| SPRY3      | 11.9256 | 4.77422 | 1.320724899 | 0.00016231 | yes | Up |
| EIF3K      | 90.697  | 36.2835 | 1.321741203 | 0.00016231 | yes | Up |
| TNPO3      | 40.712  | 16.2849 | 1.321919236 | 0.00016231 | yes | Up |
| RPS17L     | 2625.91 | 1049.93 | 1.322524325 | 0.00016231 | yes | Up |
| PNRC1      | 249.671 | 99.7301 | 1.323927356 | 0.00016231 | yes | Up |
| EF1A       | 4500.4  | 1796.35 | 1.324984764 | 0.00016231 | yes | Up |
| NELFE      | 14.7167 | 5.86842 | 1.326410172 | 0.00016231 | yes | Up |

|           |         |         |             |             |     |    |
|-----------|---------|---------|-------------|-------------|-----|----|
| RNF121    | 14.5995 | 5.82082 | 1.326624651 | 0.00016231  | yes | Up |
| BTC       | 11.4178 | 4.55205 | 1.326696387 | 0.000721449 | yes | Up |
| EIF2B4    | 12.2384 | 4.87803 | 1.327044422 | 0.00016231  | yes | Up |
| PRKAG3    | 62.6976 | 24.9826 | 1.32748659  | 0.00016231  | yes | Up |
| C8H1ORF52 | 10.5379 | 4.19246 | 1.32971847  | 0.00016231  | yes | Up |
| CNOT11    | 53.3998 | 21.2181 | 1.331538864 | 0.00016231  | yes | Up |
| G6PC3     | 14.6733 | 5.82315 | 1.33332168  | 0.00016231  | yes | Up |
| AP1B1     | 12.1798 | 4.8199  | 1.337415324 | 0.00016231  | yes | Up |
| NOL9      | 33.5955 | 13.283  | 1.338686982 | 0.00016231  | yes | Up |
| CHURC1    | 1218.35 | 481.479 | 1.339383861 | 0.00016231  | yes | Up |
| MRPL16    | 100.069 | 39.5363 | 1.339745348 | 0.00016231  | yes | Up |
| QARS      | 29.4624 | 11.6307 | 1.340937028 | 0.00016231  | yes | Up |
| MRPL38    | 22.7878 | 8.97868 | 1.343686381 | 0.00016231  | yes | Up |
| CISD3     | 11.813  | 4.652   | 1.344452393 | 0.00016231  | yes | Up |
| USP2      | 163.812 | 64.4287 | 1.346265655 | 0.00016231  | yes | Up |
| CYB561A3  | 19.2865 | 7.58418 | 1.346526245 | 0.00016231  | yes | Up |
| KANSL3    | 36.5775 | 14.3661 | 1.34828801  | 0.00016231  | yes | Up |
| LYRM1     | 36.7897 | 14.4445 | 1.348781646 | 0.00016231  | yes | Up |
| ATP1B4    | 447.193 | 175.544 | 1.349064919 | 0.00016231  | yes | Up |
| MCL1      | 51.5653 | 20.2401 | 1.349184137 | 0.00016231  | yes | Up |
| FBXO32    | 103.023 | 40.3665 | 1.351736049 | 0.00016231  | yes | Up |
| RILP      | 26.7792 | 10.4874 | 1.352455808 | 0.00016231  | yes | Up |
| CDKN1B    | 67.5216 | 26.4149 | 1.353997142 | 0.00016231  | yes | Up |
| HYAL2     | 11.5106 | 4.50231 | 1.354225737 | 0.00016231  | yes | Up |
| CHMP6     | 117.421 | 45.909  | 1.354841536 | 0.00016231  | yes | Up |
| NDUFB4    | 127.043 | 49.665  | 1.355015469 | 0.00016231  | yes | Up |
| R3HDM4    | 13.2476 | 5.17568 | 1.355910691 | 0.00016231  | yes | Up |
| CHTOP     | 44.0229 | 17.1484 | 1.360180211 | 0.00016231  | yes | Up |
| NFE2L1    | 60.3305 | 23.4946 | 1.360558333 | 0.00016231  | yes | Up |
| PTTG1IP   | 10.1721 | 3.96095 | 1.360699155 | 0.00016231  | yes | Up |
| OSR2      | 10.2045 | 3.97297 | 1.36091569  | 0.00016231  | yes | Up |
| H2A-VIII  | 15.338  | 5.95809 | 1.364188553 | 0.000587908 | yes | Up |
| SMO       | 22.219  | 8.62163 | 1.365761332 | 0.00016231  | yes | Up |
| MRPL55    | 32.3753 | 12.5434 | 1.367965105 | 0.00016231  | yes | Up |
| SHARPIN   | 16.3782 | 6.34217 | 1.368728356 | 0.00016231  | yes | Up |
| FURIN     | 31.082  | 12.0201 | 1.37063044  | 0.00016231  | yes | Up |
| DES       | 3461.61 | 1336.32 | 1.373177671 | 0.00016231  | yes | Up |
| CENPV     | 182.444 | 70.4139 | 1.37352155  | 0.00016231  | yes | Up |
| COQ4      | 28.9065 | 11.1504 | 1.374298473 | 0.00016231  | yes | Up |
| ZBTB17    | 25.7502 | 9.91933 | 1.376269055 | 0.00016231  | yes | Up |
| FKBP8     | 53.9386 | 20.7686 | 1.376914108 | 0.00016231  | yes | Up |
| CIRH1A    | 10.2443 | 3.93546 | 1.380217226 | 0.00016231  | yes | Up |
| THAP7     | 76.8955 | 29.5325 | 1.380595683 | 0.00016231  | yes | Up |
| C1orf43   | 60.4256 | 23.1799 | 1.382285551 | 0.00016231  | yes | Up |
| NKIRAS2   | 92.875  | 35.577  | 1.384345444 | 0.00016231  | yes | Up |
| GNG7      | 38.7929 | 14.8397 | 1.386330703 | 0.00016231  | yes | Up |
| SMG5      | 21.1786 | 8.10124 | 1.386392571 | 0.00016231  | yes | Up |
| GMPPA     | 18.5573 | 7.09481 | 1.387150866 | 0.00016231  | yes | Up |
| PLCD4     | 19.374  | 7.38097 | 1.392239515 | 0.00016231  | yes | Up |
| NPLOC4    | 44.7473 | 17.0468 | 1.39229969  | 0.00016231  | yes | Up |
| CTSA      | 46.5942 | 17.726  | 1.394283362 | 0.00016231  | yes | Up |
| CACNB1    | 31.5892 | 12.0056 | 1.395723895 | 0.00016231  | yes | Up |
| MRPL54    | 133.316 | 50.5792 | 1.398233813 | 0.00016231  | yes | Up |
| PLEKHH3   | 13.3328 | 5.05598 | 1.398917129 | 0.00016231  | yes | Up |

|          |         |         |             |            |     |    |
|----------|---------|---------|-------------|------------|-----|----|
| NIT1     | 11.4315 | 4.32699 | 1.401579029 | 0.00016231 | yes | Up |
| FGFR4    | 19.6196 | 7.42557 | 1.401721949 | 0.00016231 | yes | Up |
| PGP      | 81.4477 | 30.824  | 1.401819868 | 0.00016231 | yes | Up |
| PAM16    | 115.845 | 43.7513 | 1.404797987 | 0.00016231 | yes | Up |
| MAP1LC3A | 240.564 | 90.8421 | 1.404987799 | 0.00016231 | yes | Up |
| TRIM63   | 407.704 | 153.376 | 1.410449361 | 0.00016231 | yes | Up |
| P2RY2    | 38.7136 | 14.5604 | 1.410790481 | 0.00016231 | yes | Up |
| SRF      | 18.4847 | 6.94797 | 1.411668199 | 0.00016231 | yes | Up |
| TARS2    | 14.0006 | 5.24095 | 1.417588405 | 0.00016231 | yes | Up |
| GMEB2    | 20.284  | 7.58159 | 1.419769834 | 0.00016231 | yes | Up |
| NEURL2   | 17.5294 | 6.54483 | 1.421348992 | 0.00016231 | yes | Up |
| NDUFS2   | 46.9102 | 17.4573 | 1.426071207 | 0.00016231 | yes | Up |
| PITHD1   | 34.4061 | 12.7954 | 1.42703912  | 0.00016231 | yes | Up |
| BCAR1    | 19.2763 | 7.16596 | 1.427596264 | 0.00016231 | yes | Up |
| NUDCD3   | 62.3788 | 23.0842 | 1.434150064 | 0.00016231 | yes | Up |
| NDUFA1   | 428.628 | 158.573 | 1.43457895  | 0.00016231 | yes | Up |
| SNTA1    | 227.884 | 84.1129 | 1.437900653 | 0.00016231 | yes | Up |
| BRD4     | 49.9931 | 18.4069 | 1.441482314 | 0.00016231 | yes | Up |
| H2AFV    | 51.1084 | 18.8175 | 1.441485456 | 0.00016231 | yes | Up |
| ARRDC1   | 13.553  | 4.98329 | 1.443441794 | 0.00016231 | yes | Up |
| SESN1    | 622.095 | 228.65  | 1.443993992 | 0.00016231 | yes | Up |
| TFEB     | 34.6616 | 12.7219 | 1.4460241   | 0.00016231 | yes | Up |
| SSBP3    | 24.3683 | 8.9378  | 1.447013941 | 0.00016231 | yes | Up |
| TFG      | 52.9517 | 19.4136 | 1.44760933  | 0.00016231 | yes | Up |
| CHAC1    | 60.1542 | 22.0271 | 1.449385903 | 0.00016231 | yes | Up |
| RGCC     | 34.376  | 12.5702 | 1.451394078 | 0.00016231 | yes | Up |
| RNF123   | 50.115  | 18.2866 | 1.454455621 | 0.00016231 | yes | Up |
| BYSL     | 25.4545 | 9.27866 | 1.455932352 | 0.00016231 | yes | Up |
| MLLT6    | 12.204  | 4.44456 | 1.457241577 | 0.00016231 | yes | Up |
| KAT5     | 10.4785 | 3.81607 | 1.457272669 | 0.00016231 | yes | Up |
| NDUFV1   | 106.888 | 38.8408 | 1.460455074 | 0.00016231 | yes | Up |
| TMUB1    | 24.2247 | 8.79437 | 1.461826663 | 0.00016231 | yes | Up |
| CACTIN   | 36.129  | 13.0534 | 1.468731691 | 0.00016231 | yes | Up |
| NDUFS8   | 135.067 | 48.7731 | 1.469517656 | 0.00016231 | yes | Up |
| TMBIM1   | 74.0812 | 26.6734 | 1.473705734 | 0.00016231 | yes | Up |
| JPH2     | 177.677 | 63.9478 | 1.474290307 | 0.00016231 | yes | Up |
| MYF6     | 55.0523 | 19.8064 | 1.474836158 | 0.00016231 | yes | Up |
| ALDOC    | 25.8286 | 9.26983 | 1.47835466  | 0.00016231 | yes | Up |
| TUSC2    | 31.4388 | 11.2576 | 1.481646859 | 0.00016231 | yes | Up |
| NT5C3B   | 17.6605 | 6.32156 | 1.482173661 | 0.00016231 | yes | Up |
| SQSTM1   | 197.24  | 70.2256 | 1.489883207 | 0.00016231 | yes | Up |
| CTDSP1   | 54.6877 | 19.4228 | 1.493465193 | 0.00016231 | yes | Up |
| ZNF710   | 17.4999 | 6.21075 | 1.494507276 | 0.00016231 | yes | Up |
| TWF2     | 74.0246 | 26.2624 | 1.495006026 | 0.00016231 | yes | Up |
| KLF15    | 91.8229 | 32.5318 | 1.497003347 | 0.00016231 | yes | Up |
| CCNT1    | 13.8952 | 4.92288 | 1.497012122 | 0.00016231 | yes | Up |
| RNF41    | 90.2843 | 31.9446 | 1.498903057 | 0.00016231 | yes | Up |
| C17orf53 | 16.7247 | 5.91001 | 1.500747856 | 0.00016231 | yes | Up |
| MRPL10   | 59.1922 | 20.9148 | 1.500882876 | 0.00016231 | yes | Up |
| ZNF740   | 16.389  | 5.7893  | 1.501267005 | 0.00016231 | yes | Up |
| FAM195A  | 114.386 | 40.3797 | 1.50220839  | 0.00016231 | yes | Up |
| APH1A    | 15.2603 | 5.38207 | 1.503550264 | 0.00016231 | yes | Up |
| RRP12    | 24.7757 | 8.72324 | 1.505989831 | 0.00016231 | yes | Up |
| WDR73    | 24.0968 | 8.47239 | 1.508000667 | 0.00016231 | yes | Up |



|         |         |         |             |             |     |    |
|---------|---------|---------|-------------|-------------|-----|----|
| BDH1    | 52.4232 | 18.3978 | 1.510672161 | 0.00016231  | yes | Up |
| ACYP1   | 28.0098 | 9.8267  | 1.511152765 | 0.00016231  | yes | Up |
| PFKM    | 3121.55 | 1090.98 | 1.51663792  | 0.00016231  | yes | Up |
| PMEPA1  | 10.6419 | 3.70473 | 1.522315444 | 0.00016231  | yes | Up |
| VPS37C  | 65.7379 | 22.8599 | 1.523906278 | 0.00016231  | yes | Up |
| BTBD2   | 64.7698 | 22.4942 | 1.52576823  | 0.00016231  | yes | Up |
| NDUFB6  | 230.377 | 79.9892 | 1.526119562 | 0.00016231  | yes | Up |
| B4GALT2 | 86.7804 | 30.0469 | 1.530153083 | 0.00016231  | yes | Up |
| PDLIM7  | 10.888  | 3.76665 | 1.531385084 | 0.00016231  | yes | Up |
| SCAMP3  | 25.3824 | 8.77368 | 1.532574494 | 0.00016231  | yes | Up |
| PATL1   | 34.3382 | 11.8535 | 1.534501307 | 0.00016231  | yes | Up |
| HYAL1   | 10.4367 | 3.59785 | 1.536458671 | 0.00016231  | yes | Up |
| FZD8    | 12.1101 | 4.16917 | 1.538378673 | 0.00016231  | yes | Up |
| EMC4    | 41.7038 | 14.3449 | 1.539640935 | 0.00016231  | yes | Up |
| ATG9A   | 33.3237 | 11.46   | 1.539941551 | 0.00016231  | yes | Up |
| PPAPDC3 | 244.247 | 83.9484 | 1.540766108 | 0.00016231  | yes | Up |
| WIPF2   | 15.4454 | 5.30733 | 1.541119073 | 0.00016231  | yes | Up |
| AAAS    | 37.9114 | 12.9673 | 1.547753615 | 0.00016231  | yes | Up |
| HPS6    | 22.0041 | 7.52506 | 1.547997374 | 0.00016231  | yes | Up |
| cVg1    | 14.5205 | 4.96458 | 1.548347555 | 0.00016231  | yes | Up |
| PEO1    | 23.3525 | 7.97383 | 1.550232253 | 0.00016231  | yes | Up |
| SLC43A2 | 63.2063 | 21.5685 | 1.551142518 | 0.00016231  | yes | Up |
| RAB5B   | 34.0505 | 11.616  | 1.551562625 | 0.00016231  | yes | Up |
| RAB24   | 24.5799 | 8.37755 | 1.552878749 | 0.00016231  | yes | Up |
| BCL7B   | 18.8037 | 6.40336 | 1.554115542 | 0.00016231  | yes | Up |
| ZNF593  | 157.969 | 53.617  | 1.558879066 | 0.00016231  | yes | Up |
| SHC1    | 20.08   | 6.80621 | 1.560835699 | 0.00016231  | yes | Up |
| EIF4B   | 46.9258 | 15.8925 | 1.562035252 | 0.00016231  | yes | Up |
| TIMM8A  | 18.1584 | 6.14587 | 1.562947931 | 0.00016231  | yes | Up |
| SGCA    | 51.8815 | 17.5555 | 1.563297105 | 0.00016231  | yes | Up |
| FAM96A  | 11.8979 | 4.024   | 1.564004748 | 0.000721449 | yes | Up |
| ASB2    | 1336.71 | 451.786 | 1.564975036 | 0.00016231  | yes | Up |
| MON1A   | 29.2496 | 9.85745 | 1.569130503 | 0.00016231  | yes | Up |
| TESK1   | 18.7929 | 6.32658 | 1.570689983 | 0.00016231  | yes | Up |
| KANSL2  | 15.4261 | 5.19152 | 1.571144463 | 0.00016231  | yes | Up |
| NFKB2   | 24.1028 | 8.09046 | 1.574907115 | 0.00016231  | yes | Up |
| FAAH2   | 10.2284 | 3.41765 | 1.581503922 | 0.00016231  | yes | Up |
| APOPT1  | 44.6523 | 14.8477 | 1.588495023 | 0.00016231  | yes | Up |
| SPRYD3  | 18.3144 | 6.08782 | 1.588980829 | 0.00016231  | yes | Up |
| GRHPR   | 12.4735 | 4.14346 | 1.589958435 | 0.00016231  | yes | Up |
| WNT5B   | 43.9591 | 14.5896 | 1.59122152  | 0.00016231  | yes | Up |
| LAMTOR1 | 219.192 | 72.4017 | 1.598099667 | 0.00016231  | yes | Up |
| GCH1    | 15.9471 | 5.26141 | 1.599772709 | 0.00016231  | yes | Up |
| SPSB1   | 27.4066 | 9.02063 | 1.603223262 | 0.00016231  | yes | Up |
| CBFA2T2 | 21.8448 | 7.18698 | 1.603832321 | 0.00016231  | yes | Up |
| DGUOK   | 11.5486 | 3.78652 | 1.608773515 | 0.00016231  | yes | Up |
| TIMM10  | 19.3536 | 6.34499 | 1.608912154 | 0.00016231  | yes | Up |
| GIT1    | 22.7048 | 7.43946 | 1.609727518 | 0.00016231  | yes | Up |
| RPS26   | 562.804 | 183.532 | 1.616600954 | 0.00016231  | yes | Up |
| RARA    | 21.5165 | 7.00515 | 1.618955571 | 0.00016231  | yes | Up |
| ZNF511  | 24.1775 | 7.82413 | 1.627662828 | 0.00016231  | yes | Up |
| MT4     | 20.1102 | 6.50178 | 1.629020784 | 0.00016231  | yes | Up |
| SPATS2  | 20.014  | 6.44225 | 1.635372981 | 0.00016231  | yes | Up |
| OSBP    | 46.1973 | 14.8514 | 1.6372096   | 0.00016231  | yes | Up |

|              |         |         |             |            |     |    |
|--------------|---------|---------|-------------|------------|-----|----|
| WDR83OS      | 29.0744 | 9.33441 | 1.639118677 | 0.00016231 | yes | Up |
| LSM10        | 11.5061 | 3.68643 | 1.642102646 | 0.00016231 | yes | Up |
| MIEN1        | 20.9892 | 6.71825 | 1.643489792 | 0.00016231 | yes | Up |
| TAP2         | 11.3773 | 3.63708 | 1.645305661 | 0.00016231 | yes | Up |
| RPS28        | 379.06  | 120.94  | 1.648134741 | 0.00016231 | yes | Up |
| UCKL1        | 44.5739 | 14.2039 | 1.649912087 | 0.00016231 | yes | Up |
| CREB3        | 11.5438 | 3.67166 | 1.652613835 | 0.00016231 | yes | Up |
| MTG1         | 21.8425 | 6.936   | 1.654962187 | 0.00016231 | yes | Up |
| ZNF609       | 25.9132 | 8.22592 | 1.655438237 | 0.00016231 | yes | Up |
| DKK3         | 28.5309 | 9.03812 | 1.65843064  | 0.00016231 | yes | Up |
| PPAPDC2      | 21.6645 | 6.83196 | 1.664961507 | 0.00016231 | yes | Up |
| KLHL38       | 26.584  | 8.36788 | 1.66762413  | 0.00016231 | yes | Up |
| NR2F6        | 49.9972 | 15.7188 | 1.669356218 | 0.00016231 | yes | Up |
| AIP          | 14.1563 | 4.44438 | 1.671390161 | 0.00016231 | yes | Up |
| PHPT1        | 18.3824 | 5.76713 | 1.672399688 | 0.00016231 | yes | Up |
| CRTC1        | 11.0389 | 3.46226 | 1.672810444 | 0.00016231 | yes | Up |
| GOT2         | 227.843 | 71.4575 | 1.672882701 | 0.00016231 | yes | Up |
| ECHS1        | 59.7832 | 18.7303 | 1.674366115 | 0.00016231 | yes | Up |
| PSMB3        | 128.131 | 40.084  | 1.676521175 | 0.00016231 | yes | Up |
| PSMD11       | 97.6796 | 30.484  | 1.680005072 | 0.00016231 | yes | Up |
| BFIV21       | 177.333 | 55.3306 | 1.68031156  | 0.00016231 | yes | Up |
| TSC22D3      | 188.872 | 58.8417 | 1.682498007 | 0.00016231 | yes | Up |
| MAFA         | 207.582 | 64.3924 | 1.688719022 | 0.00016231 | yes | Up |
| BHLHE40      | 36.8113 | 11.4009 | 1.691000983 | 0.00016231 | yes | Up |
| COASY        | 22.8916 | 7.08106 | 1.692781057 | 0.00016231 | yes | Up |
| FASTK        | 92.8685 | 28.6281 | 1.697757409 | 0.00016231 | yes | Up |
| PIK3IP1      | 75.5491 | 23.159  | 1.70584161  | 0.00016231 | yes | Up |
| Six2         | 157.234 | 48.091  | 1.709074386 | 0.00016231 | yes | Up |
| C19orf25     | 24.6806 | 7.54695 | 1.709411846 | 0.00016231 | yes | Up |
| MRPS12       | 50.1178 | 15.3196 | 1.709944458 | 0.00016231 | yes | Up |
| TIMM13       | 131.378 | 40.09   | 1.712409386 | 0.00016231 | yes | Up |
| CRYAB        | 293.575 | 89.4807 | 1.71408067  | 0.00016231 | yes | Up |
| DUSP23       | 40.9594 | 12.4835 | 1.714172103 | 0.00016231 | yes | Up |
| C12H3ORF37   | 10.4757 | 3.19218 | 1.714432741 | 0.00016231 | yes | Up |
| KIFC3        | 24.2868 | 7.39332 | 1.715878152 | 0.00016231 | yes | Up |
| C5H14ORF169  | 28.2196 | 8.58922 | 1.716098509 | 0.00016231 | yes | Up |
| FGF1         | 15.5345 | 4.72759 | 1.716298979 | 0.00016231 | yes | Up |
| MPV17L2      | 20.7641 | 6.31014 | 1.718347422 | 0.00016231 | yes | Up |
| FAM47E-STBD1 | 261.168 | 79.3156 | 1.719301587 | 0.00016231 | yes | Up |
| CYBA         | 15.0611 | 4.57199 | 1.719932989 | 0.00016231 | yes | Up |
| USP36        | 20.5161 | 6.2191  | 1.721978788 | 0.00016231 | yes | Up |
| RFC5         | 17.522  | 5.3032  | 1.724232394 | 0.00016231 | yes | Up |
| SEMA6B       | 24.2224 | 7.32594 | 1.725256027 | 0.00016231 | yes | Up |
| NOB1         | 36.6911 | 11.0958 | 1.725416469 | 0.00016231 | yes | Up |
| MRPL2        | 98.0437 | 29.6001 | 1.72782288  | 0.00016231 | yes | Up |
| THRA         | 61.5849 | 18.5677 | 1.729781542 | 0.00016231 | yes | Up |
| TPN          | 20.1098 | 6.04666 | 1.733688369 | 0.00016231 | yes | Up |
| USF1         | 64.5321 | 19.373  | 1.735969595 | 0.00016231 | yes | Up |
| KCNN3        | 26.8552 | 8.04757 | 1.73857634  | 0.00016231 | yes | Up |
| PLEKHM2      | 145.749 | 43.6471 | 1.739528278 | 0.00016231 | yes | Up |
| SESN2        | 77.4711 | 23.1162 | 1.744753967 | 0.00016231 | yes | Up |
| TM2D2        | 16.8719 | 5.02484 | 1.747472885 | 0.00016231 | yes | Up |
| GNMT         | 10.2744 | 3.04486 | 1.754606346 | 0.00016231 | yes | Up |
| HIC1         | 16.3567 | 4.84554 | 1.755152353 | 0.00016231 | yes | Up |

|          |         |         |             |             |     |    |
|----------|---------|---------|-------------|-------------|-----|----|
| WDR13    | 19.8225 | 5.87005 | 1.755694229 | 0.00016231  | yes | Up |
| C16ORF5  | 93.4794 | 27.6306 | 1.758381583 | 0.00016231  | yes | Up |
| PSMD2    | 52.9282 | 15.6171 | 1.760910012 | 0.00016231  | yes | Up |
| SNX21    | 28.2945 | 8.34511 | 1.761518672 | 0.00016231  | yes | Up |
| MEX3D    | 12.0299 | 3.54358 | 1.763345125 | 0.00016231  | yes | Up |
| DUSP26   | 17.1292 | 5.0261  | 1.768946493 | 0.00016231  | yes | Up |
| SUV39H1  | 17.4086 | 5.08548 | 1.77534433  | 0.00016231  | yes | Up |
| FZD1     | 12.9956 | 3.79491 | 1.775885668 | 0.00016231  | yes | Up |
| SRSF2    | 22.0181 | 6.40417 | 1.78160647  | 0.00016231  | yes | Up |
| ATP6V0B  | 22.3803 | 6.49435 | 1.784972332 | 0.00016231  | yes | Up |
| IRS1     | 129.587 | 37.5296 | 1.787820177 | 0.00016231  | yes | Up |
| GLUL     | 61.1258 | 17.6932 | 1.788586444 | 0.00016231  | yes | Up |
| RUSC1    | 16.5607 | 4.78528 | 1.791088407 | 0.00016231  | yes | Up |
| ABCB6    | 14.1713 | 4.06858 | 1.800374846 | 0.00016231  | yes | Up |
| CORO6    | 254.711 | 72.766  | 1.807524853 | 0.00016231  | yes | Up |
| ERBB2    | 14.0351 | 4.00709 | 1.808412525 | 0.00016231  | yes | Up |
| NHP2     | 34.8992 | 9.93225 | 1.813001485 | 0.00016231  | yes | Up |
| DECR2    | 31.5319 | 8.93873 | 1.818670329 | 0.00016231  | yes | Up |
| TMEM115  | 43.0024 | 12.1874 | 1.819026799 | 0.00016231  | yes | Up |
| ZNF142   | 16.1629 | 4.56766 | 1.823158904 | 0.00016231  | yes | Up |
| DTX4     | 16.5867 | 4.68391 | 1.824241624 | 0.00016231  | yes | Up |
| PHC2     | 18.4828 | 5.20564 | 1.828035881 | 0.00016231  | yes | Up |
| GPATCH4  | 12.2597 | 3.45005 | 1.829234501 | 0.00016231  | yes | Up |
| ATRAID   | 10.0183 | 2.80989 | 1.83405216  | 0.00016231  | yes | Up |
| IRF2BP2  | 162.342 | 45.4908 | 1.835389581 | 0.00016231  | yes | Up |
| IL17RC   | 22.209  | 6.19871 | 1.841104519 | 0.00016231  | yes | Up |
| SFXN3    | 27.7928 | 7.73254 | 1.84569689  | 0.00016231  | yes | Up |
| IER5     | 84.9594 | 23.5908 | 1.848549234 | 0.00016231  | yes | Up |
| TCF15    | 14.8548 | 4.09588 | 1.858683828 | 0.00016231  | yes | Up |
| MYOD1    | 218.804 | 60.1403 | 1.863235143 | 0.00016231  | yes | Up |
| GTF3C2   | 15.9482 | 4.38347 | 1.863248323 | 0.00016231  | yes | Up |
| SKIV2L   | 14.4612 | 3.96743 | 1.865910599 | 0.00016231  | yes | Up |
| ASNA1    | 49.5161 | 13.5577 | 1.868785236 | 0.00016231  | yes | Up |
| TPP1     | 47.3478 | 12.7897 | 1.888314969 | 0.00016231  | yes | Up |
| HSPBP1   | 12.8388 | 3.46233 | 1.890695223 | 0.00016231  | yes | Up |
| FAM160A2 | 56.578  | 15.1462 | 1.901285295 | 0.00016231  | yes | Up |
| NPTXR    | 10.3258 | 2.76367 | 1.901596296 | 0.00016231  | yes | Up |
| PFDN2    | 55.013  | 14.718  | 1.902190939 | 0.00016231  | yes | Up |
| DNAJB2   | 381.93  | 101.957 | 1.905347417 | 0.00016231  | yes | Up |
| CSTA     | 22.4575 | 5.99358 | 1.905707438 | 0.00016231  | yes | Up |
| BNIP3    | 372.402 | 99.3671 | 1.906020655 | 0.00016231  | yes | Up |
| UBALD1   | 149.053 | 39.7321 | 1.90744846  | 0.00016231  | yes | Up |
| FAM136A  | 11.6395 | 3.09549 | 1.910789382 | 0.00016231  | yes | Up |
| IDH2     | 171.705 | 45.5786 | 1.913503534 | 0.00016231  | yes | Up |
| TMEM203  | 79.2859 | 21.0048 | 1.916345274 | 0.00016231  | yes | Up |
| TFAP4    | 12.2593 | 3.2386  | 1.920434407 | 0.00016231  | yes | Up |
| GADD45B  | 27.213  | 7.18052 | 1.92213578  | 0.00016231  | yes | Up |
| C15orf61 | 72.1244 | 19.0252 | 1.922575792 | 0.00016231  | yes | Up |
| LLGL1    | 20.5999 | 5.4305  | 1.923480392 | 0.00016231  | yes | Up |
| ZBTB16   | 10.2733 | 2.69697 | 1.929488301 | 0.000721449 | yes | Up |
| MRPL24   | 72.7324 | 19.0814 | 1.930431157 | 0.00016231  | yes | Up |
| TMEM161A | 13.125  | 3.43647 | 1.933318153 | 0.00016231  | yes | Up |
| MRPL17   | 59.2759 | 15.4913 | 1.935987445 | 0.00016231  | yes | Up |
| MKNK2    | 114.513 | 29.8116 | 1.941565676 | 0.00016231  | yes | Up |

|          |         |         |             |            |     |    |
|----------|---------|---------|-------------|------------|-----|----|
| CDC26    | 29.1456 | 7.58201 | 1.942625837 | 0.00016231 | yes | Up |
| Stat5    | 274.319 | 70.5471 | 1.959195866 | 0.00016231 | yes | Up |
| CS       | 91.9748 | 23.6299 | 1.96062511  | 0.00016231 | yes | Up |
| SYNGR2   | 153.163 | 39.28   | 1.963200989 | 0.00016231 | yes | Up |
| NAA38    | 45.0539 | 11.534  | 1.965759068 | 0.00016231 | yes | Up |
| NPB      | 20.872  | 5.31979 | 1.972127648 | 0.00016231 | yes | Up |
| PSMB4    | 307.977 | 78.1618 | 1.978287016 | 0.00016231 | yes | Up |
| IPO13    | 26.2641 | 6.66231 | 1.978997758 | 0.00016231 | yes | Up |
| COMMD4   | 17.0631 | 4.31553 | 1.983270121 | 0.00016231 | yes | Up |
| HES4     | 11.8442 | 2.99129 | 1.985341068 | 0.00016231 | yes | Up |
| LDHD     | 17.574  | 4.43528 | 1.986345509 | 0.00016231 | yes | Up |
| SHF      | 28.8073 | 7.21759 | 1.996845351 | 0.00016231 | yes | Up |
| UCH-L1   | 27.4969 | 6.82465 | 2.010442014 | 0.00016231 | yes | Up |
| Wpkci    | 15.9893 | 3.96427 | 2.011979649 | 0.00016231 | yes | Up |
| RABIF    | 10.4291 | 2.58282 | 2.013595654 | 0.00016231 | yes | Up |
| ADM      | 16.7993 | 4.13757 | 2.021545494 | 0.00016231 | yes | Up |
| SNRNP25  | 16.635  | 4.08773 | 2.024850054 | 0.00016231 | yes | Up |
| GAMT     | 99.2742 | 24.3689 | 2.0263777   | 0.00016231 | yes | Up |
| BAHCC1   | 12.7814 | 3.13007 | 2.029779043 | 0.00016231 | yes | Up |
| DNAJC30  | 23.6905 | 5.78252 | 2.034538392 | 0.00016231 | yes | Up |
| PARS2    | 10.127  | 2.46225 | 2.040157701 | 0.00016231 | yes | Up |
| ARNT     | 81.1077 | 19.3149 | 2.070124676 | 0.00016231 | yes | Up |
| PURA     | 37.3771 | 8.76602 | 2.092160763 | 0.00016231 | yes | Up |
| NUDT8    | 11.8143 | 2.76606 | 2.094629796 | 0.00016231 | yes | Up |
| C7orf55  | 13.41   | 3.12918 | 2.099452683 | 0.00016231 | yes | Up |
| PGF      | 14.4258 | 3.3447  | 2.108702607 | 0.00016231 | yes | Up |
| SAMD11   | 14.3125 | 3.31517 | 2.110120935 | 0.00016231 | yes | Up |
| SPATA2L  | 21.408  | 4.93511 | 2.116995874 | 0.00016231 | yes | Up |
| CYP27A1  | 29.5147 | 6.76133 | 2.12605471  | 0.00016231 | yes | Up |
| CRELD1   | 77.9738 | 17.7951 | 2.131509405 | 0.00016231 | yes | Up |
| ARRDC2   | 60.1042 | 13.5774 | 2.14625857  | 0.00016231 | yes | Up |
| PDK4     | 74.8254 | 16.862  | 2.149752422 | 0.00016231 | yes | Up |
| JTB      | 167.46  | 37.6116 | 2.154566945 | 0.00016231 | yes | Up |
| TOMM40L  | 89.2559 | 19.9899 | 2.158676282 | 0.00016231 | yes | Up |
| LAMB2    | 42.0385 | 9.37466 | 2.16487292  | 0.00016231 | yes | Up |
| PSMD3    | 180.697 | 40.0189 | 2.174819137 | 0.00016231 | yes | Up |
| LZTS2    | 32.6438 | 7.19894 | 2.180952609 | 0.00016231 | yes | Up |
| POLR3K   | 104.343 | 22.658  | 2.203241392 | 0.00016231 | yes | Up |
| SLC35F6  | 20.5077 | 4.3955  | 2.222066508 | 0.00016231 | yes | Up |
| GPR157   | 52.3412 | 10.9796 | 2.253121505 | 0.00016231 | yes | Up |
| DOHH     | 58.7952 | 12.3297 | 2.253560682 | 0.00016231 | yes | Up |
| ST3GAL2  | 16.0206 | 3.33973 | 2.262124802 | 0.00016231 | yes | Up |
| SIX1     | 246.477 | 51.3729 | 2.262373607 | 0.00016231 | yes | Up |
| S100A10  | 2609.83 | 535.523 | 2.284935392 | 0.00016231 | yes | Up |
| TMEM167B | 91.4136 | 18.7572 | 2.284964333 | 0.00016231 | yes | Up |
| C22orf39 | 16.885  | 3.35876 | 2.329741563 | 0.00016231 | yes | Up |
| SLC25A39 | 36.4504 | 7.18652 | 2.342569412 | 0.00016231 | yes | Up |
| NOG2     | 12.6583 | 2.43663 | 2.377124564 | 0.00016231 | yes | Up |
| SPEG     | 136.799 | 26.1857 | 2.385206607 | 0.00016231 | yes | Up |
| CPN1     | 17.6639 | 3.34408 | 2.401122643 | 0.00016231 | yes | Up |
| SMPD1    | 57.7743 | 10.9062 | 2.405279358 | 0.00016231 | yes | Up |
| TBC1D25  | 12.9105 | 2.42926 | 2.409956062 | 0.00016231 | yes | Up |
| MPP1     | 83.8075 | 15.0893 | 2.473553478 | 0.00016231 | yes | Up |
| RAD23A   | 436.3   | 76.7493 | 2.507094976 | 0.00016231 | yes | Up |

|                                                                                                                                                                                              |         |         |             |            |     |    |
|----------------------------------------------------------------------------------------------------------------------------------------------------------------------------------------------|---------|---------|-------------|------------|-----|----|
| AIFM2                                                                                                                                                                                        | 13.2314 | 2.26844 | 2.544193314 | 0.00016231 | yes | Up |
| CDK5                                                                                                                                                                                         | 13.2684 | 2.26375 | 2.551207864 | 0.00016231 | yes | Up |
| IRS2                                                                                                                                                                                         | 14.5185 | 2.42436 | 2.582216557 | 0.00016231 | yes | Up |
| OCLN                                                                                                                                                                                         | 12.9102 | 2.03253 | 2.667162799 | 0.00016231 | yes | Up |
| CEBPB                                                                                                                                                                                        | 92.563  | 14.1096 | 2.713758535 | 0.00016231 | yes | Up |
| ZNF638                                                                                                                                                                                       | 18.8467 | 2.52932 | 2.897490456 | 0.00016231 | yes | Up |
| FAM43A                                                                                                                                                                                       | 32.6733 | 4.36329 | 2.904623905 | 0.00016231 | yes | Up |
| ANKRD9                                                                                                                                                                                       | 139.75  | 17.737  | 2.978014362 | 0.00016231 | yes | Up |
| ACACB                                                                                                                                                                                        | 13.6302 | 1.67215 | 3.027030556 | 0.00016231 | yes | Up |
| FZD2                                                                                                                                                                                         | 119.752 | 14.639  | 3.03216084  | 0.00016231 | yes | Up |
| HYAL3                                                                                                                                                                                        | 11.6801 | 1.31964 | 3.145836307 | 0.00016231 | yes | Up |
| pvalb1                                                                                                                                                                                       | 28.115  | 1.16183 | 4.596869154 | 0.00016231 | yes | Up |
| <small>"Up" means gene was up-regulated in hypertrophic broiler compared to leaner broiler. "Down" means gene was down-regulated in hypertrophic broiler compared to leaner broiler.</small> |         |         |             |            |     |    |

**Table S3. Differential expression analysis of miRNAs in breast muscle between hypertrophic and leaner broilers.**

| miRNA           | WRR-FPKM   | XH-FPKM    | log2(WRR/XH) | q value     | Regulation <sup>a</sup> |
|-----------------|------------|------------|--------------|-------------|-------------------------|
| gga-miR-24-3p   | 18037.72   | 29569.61   | -0.703531782 | 0           | Down                    |
| gga-miR-454-3p  | 26265.61   | 42837.71   | -0.696139826 | 0           | Down                    |
| gga-miR-130b-3p | 6614.13    | 10662.16   | -0.679309987 | 1.30E-203   | Down                    |
| gga-miR-16-5p   | 56158.77   | 85642.55   | -0.599249972 | 0           | Down                    |
| gga-miR-215-5p  | 14382.9    | 20757.1    | -0.519683861 | 6.37E-245   | Down                    |
| gga-miR-206     | 26129.24   | 36261.21   | -0.463195462 | 0           | Down                    |
| gga-miR-146c-5p | 1018926.72 | 1409369.85 | -0.458433516 | 0           | Down                    |
| gga-miR-34a-5p  | 3063.87    | 4134.98    | -0.422958824 | 1.67E-34    | Down                    |
| gga-miR-19b-3p  | 61345.53   | 77980.92   | -0.336596508 | 0           | Down                    |
| gga-miR-20b-5p  | 6200.47    | 7875.37    | -0.335403686 | 2.62E-42    | Down                    |
| gga-miR-19a-3p  | 59718.13   | 75391.42   | -0.326664913 | 0           | Down                    |
| gga-miR-30c-5p  | 450797.58  | 568867.75  | -0.326047081 | 0           | Down                    |
| gga-miR-30a-3p  | 161784.91  | 204077.2   | -0.325471516 | 0           | Down                    |
| gga-miR-106-5p  | 15701.18   | 19647.31   | -0.313892371 | 1.17E-91    | Down                    |
| gga-miR-23b-3p  | 83219.9    | 103843.03  | -0.309837482 | 0           | Down                    |
| gga-miR-30d-5p  | 3872505.2  | 4800290.23 | -0.300288016 | 0           | Down                    |
| gga-miR-126-3p  | 186591.32  | 227736.18  | -0.27791519  | 0           | Down                    |
| gga-miR-16c-5p  | 11005.37   | 13366.75   | -0.270874638 | 9.68E-48    | Down                    |
| gga-miR-1b-3p   | 311723.47  | 376965.31  | -0.264598543 | 0           | Down                    |
| gga-miR-1a-3p   | 362868.23  | 438537.85  | -0.263689173 | 0           | Down                    |
| gga-miR-499-5p  | 3477.53    | 4200.74    | -0.263014091 | 5.47E-15    | Down                    |
| gga-miR-196-5p  | 9318.88    | 11221.16   | -0.258426903 | 6.42E-37    | Down                    |
| gga-miR-30b-5p  | 70087.1    | 84269.7    | -0.256298615 | 5.43E-265   | Down                    |
| gga-miR-183-5p  | 1050.08    | 1257.76    | -0.250790974 | 6.63E-05    | Down                    |
| gga-miR-3523    | 8246.08    | 9848.32    | -0.246602739 | 7.18E-30    | Down                    |
| gga-miR-190a-5p | 4073.03    | 4858.39    | -0.244809421 | 4.22E-15    | Down                    |
| gga-miR-17-5p   | 23906.35   | 28303.64   | -0.234027283 | 1.05E-75    | Down                    |
| gga-miR-181b-5p | 104412.41  | 123095.75  | -0.227921315 | 0           | Down                    |
| gga-miR-30a-5p  | 5516178.95 | 6501640.5  | -0.227568083 | 0           | Down                    |
| gga-miR-20a-5p  | 17755.88   | 20913.29   | -0.226556733 | 6.19E-53    | Down                    |
| gga-let-7i      | 271147.69  | 318697.47  | -0.223542244 | 0           | Down                    |
| gga-miR-222a    | 31511.46   | 36959.96   | -0.220520153 | 5.73E-88    | Down                    |
| gga-miR-10a-3p  | 2368.36    | 2753.91    | -0.208026576 | 6.49E-07    | Down                    |
| gga-miR-126-5p  | 636020.61  | 736626.19  | -0.202292733 | 0           | Down                    |
| gga-miR-140-5p  | 3682.1     | 4258.29    | -0.200178953 | 1.83E-09    | Down                    |
| gga-miR-146a-5p | 56313.33   | 64523.74   | -0.186787156 | 3.80E-111   | Down                    |
| gga-miR-455-5p  | 2386.54    | 2712.81    | -0.175301048 | 3.23E-05    | Down                    |
| gga-miR-30e-5p  | 3635178.24 | 4124439.17 | -0.172605412 | 0           | Down                    |
| gga-miR-18a-5p  | 2800.21    | 3123.84    | -0.148219094 | 0.000162346 | Down                    |
| gga-miR-128-3p  | 99089.28   | 110172.91  | -0.143402193 | 1.43E-113   | Down                    |
| gga-miR-193a-3p | 27315.69   | 30161.5    | -0.13341187  | 6.28E-28    | Down                    |
| gga-miR-15a     | 66127.71   | 71018.04   | -0.09336416  | 1.80E-32    | Down                    |
| gga-miR-15c-5p  | 78633.19   | 83587.39   | -0.078580488 | 2.09E-27    | Down                    |
| gga-miR-130c-3p | 95061.7    | 101023.35  | -0.078186239 | 1.45E-32    | Down                    |
| gga-miR-130a-3p | 95161.71   | 100513.67  | -0.069372179 | 7.62E-26    | Down                    |
| gga-miR-146b-5p | 107962.67  | 113674.9   | -0.064814731 | 1.40E-25    | Down                    |

|                 |             |             |              |           |      |
|-----------------|-------------|-------------|--------------|-----------|------|
| gga-miR-15b-5p  | 52240.3     | 54724.75    | -0.057463834 | 2.08E-10  | Down |
| gga-miR-107-3p  | 57663.43    | 59591.36    | -0.037880075 | 1.61E-05  | Down |
| gga-miR-26a-5p  | 5512392.3   | 5684205.49  | -0.034713704 | 0         | Down |
| gga-miR-133a-3p | 16177058.89 | 16418961.92 | -0.011847135 | 4.63E-144 | Down |
| gga-miR-133c-3p | 15232674.15 | 15445951.44 | -0.010493064 | 1.69E-105 | Down |
| gga-miR-133b-3p | 15123175    | 15329185.58 | -0.009953553 | 3.00E-94  | Down |
| gga-miR-92-3p   | 543713.66   | 539248.81   | 0.021462429  | 2.80E-14  | Up   |
| gga-let-7g-5p   | 161712.18   | 156890.77   | 0.053234308  | 7.39E-25  | Up   |
| gga-miR-140-3p  | 142165.25   | 137391.43   | 0.058843291  | 1.51E-26  | Up   |
| gga-miR-22-3p   | 6060606.31  | 5856904.53  | 0.058890194  | 0         | Up   |
| gga-miR-456-3p  | 20001.51    | 19170.51    | 0.070786644  | 2.93E-06  | Up   |
| gga-miR-221-3p  | 50108.32    | 48024.93    | 0.070833101  | 4.73E-14  | Up   |
| gga-miR-2188-5p | 39066.58    | 37420.32    | 0.07167951   | 1.91E-11  | Up   |
| gga-miR-181a-5p | 2087579.9   | 1996273.67  | 0.074088345  | 0         | Up   |
| gga-miR-214     | 34825.35    | 33293.56    | 0.074461152  | 4.80E-11  | Up   |
| gga-let-7f-5p   | 1810554.5   | 1701629.77  | 0.099080869  | 0         | Up   |
| gga-miR-365-3p  | 27974.83    | 26158.05    | 0.10644081   | 3.39E-17  | Up   |
| gga-miR-27b-3p  | 494682.7    | 459171.63   | 0.117036382  | 0         | Up   |
| gga-let-7j-5p   | 1933522.85  | 1763522.91  | 0.142337939  | 0         | Up   |
| gga-miR-148a-3p | 1311848.77  | 1183894.35  | 0.157627517  | 0         | Up   |
| gga-miR-1662    | 2863.85     | 2581.28     | 0.159435729  | 9.78E-05  | Up   |
| gga-miR-1416-5p | 6400.48     | 5680.46     | 0.181738783  | 1.39E-11  | Up   |
| gga-let-7b-5p   | 372600.78   | 329030.81   | 0.188974455  | 0         | Up   |
| gga-miR-451     | 129168.82   | 113880.42   | 0.191304584  | 2.73E-233 | Up   |
| gga-miR-146c-5p | 4691.26     | 4126.76     | 0.194532365  | 7.10E-10  | Up   |
| gga-miR-101-3p  | 474140.24   | 401158.63   | 0.250707448  | 0         | Up   |
| gga-miR-1729-5p | 1368.28     | 1150.89     | 0.259179981  | 1.59E-05  | Up   |
| gga-miR-29a-3p  | 11632.69    | 9782.55     | 0.25946871   | 9.25E-39  | Up   |
| gga-miR-29c-3p  | 11632.69    | 9782.55     | 0.25946871   | 9.25E-39  | Up   |
| gga-miR-2964    | 75060.2     | 62386.38    | 0.276383478  | 2.63E-274 | Up   |
| gga-let-7c-5p   | 1103087.6   | 913460.21   | 0.281700016  | 0         | Up   |
| gga-miR-199-3p  | 765589.46   | 619391.76   | 0.31528522   | 0         | Up   |
| gga-miR-10a-5p  | 4289804.8   | 3459316.03  | 0.319991626  | 0         | Up   |
| gga-miR-10b-5p  | 4144516.59  | 3278815.61  | 0.347595509  | 0         | Up   |
| gga-miR-153-3p  | 2145.62     | 1644.13     | 0.393636657  | 2.22E-16  | Up   |
| gga-miR-1559-5p | 6850.52     | 4924.16     | 0.485902305  | 6.64E-73  | Up   |
| gga-miR-199-5p  | 157089.1    | 112030.78   | 0.497254361  | 0         | Up   |
| gga-miR-142-3p  | 10428.06    | 7423.23     | 0.499918257  | 4.44E-116 | Up   |
| gga-miR-125b-5p | 404462.27   | 285609.43   | 0.511527957  | 0         | Up   |
| gga-miR-9-5p    | 1495.57     | 1035.8      | 0.539516416  | 3.95E-20  | Up   |
| gga-miR-1744-3p | 2359.27     | 1586.58     | 0.581986708  | 1.80E-35  | Up   |
| gga-miR-223     | 6027.73     | 3904.8      | 0.635932582  | 1.00E-103 | Up   |
| gga-miR-204     | 4336.69     | 2762.13     | 0.66037954   | 4.14E-80  | Up   |
| gga-miR-211     | 4336.69     | 2762.13     | 0.66037954   | 4.14E-80  | Up   |
| gga-miR-144-3p  | 3209.33     | 1972.95     | 0.711484191  | 8.31E-68  | Up   |
| gga-miR-458a-3p | 2745.66     | 1660.57     | 0.735040888  | 1.59E-61  | Up   |
| gga-miR-99a-5p  | 350453.66   | 211155.16   | 0.740486631  | 0         | Up   |
| gga-miR-146b-5p | 3582.09     | 2153.81     | 0.743477041  | 1.88E-81  | Up   |
| gga-miR-100-5p  | 464966.83   | 276139.26   | 0.761298226  | 0         | Up   |
| gga-miR-21-5p   | 489673.23   | 288873.02   | 0.770950304  | 0         | Up   |
| gga-miR-489-3p  | 6582.31     | 3822.59     | 0.793609947  | 3.09E-166 | Up   |

|                                                                                                                                                                                                            |           |          |             |           |    |
|------------------------------------------------------------------------------------------------------------------------------------------------------------------------------------------------------------|-----------|----------|-------------|-----------|----|
| gga-miR-218-5p                                                                                                                                                                                             | 6523.22   | 3337.58  | 0.97634831  | 1.72E-233 | Up |
| gga-miR-142-5p                                                                                                                                                                                             | 108462.71 | 54058.88 | 1.014162038 | 0         | Up |
| gga-miR-205a                                                                                                                                                                                               | 4900.37   | 2137.36  | 1.206627201 | 2.97E-247 | Up |
| gga-miR-155                                                                                                                                                                                                | 5204.94   | 1759.22  | 1.574512065 | 0         | Up |
| <small><sup>a</sup>"Up" means miRNA was up-regulated in hypertrophic broiler compared to leaner broiler. "Down" means miRNA was down-regulated in hypertrophic broiler compared to leaner broiler.</small> |           |          |             |           |    |



**Table S4. Differentially expressed miRNAs and their corresponding target genes with differential expression in hypertrophic broiler compared with leaner broiler.**

| miRNA           | WRR-FKPM    | XH-FKPM     | log2(WRR/XH) | q value   | Gene     | WRR-FKPM | XH-FKPM  | log2(WRR/XH) | q value    | Correlation <sup>a</sup> |
|-----------------|-------------|-------------|--------------|-----------|----------|----------|----------|--------------|------------|--------------------------|
| gga-miR-133a-3p | 16177058.89 | 16418961.92 | -0.011847135 | 4.63E-144 | VAPB     | 11.1896  | 23.6654  | -1.080620843 | 0.00016231 | Postive                  |
| gga-miR-133c-3p | 15232674.15 | 15445951.44 | -0.010493064 | 1.69E-105 | VAPB     | 11.1896  | 23.6654  | -1.080620843 | 0.00016231 | Postive                  |
| gga-miR-133b-3p | 15123175    | 15329185.58 | -0.009953553 | 3.00E-94  | VAPB     | 11.1896  | 23.6654  | -1.080620843 | 0.00016231 | Postive                  |
| gga-miR-22-3p   | 6060606.31  | 5856904.53  | 0.058890194  | 0         | PRKAB1   | 22.2788  | 10.062   | 1.146754432  | 0.00016231 | Postive                  |
| gga-miR-22-3p   | 6060606.31  | 5856904.53  | 0.058890194  | 0         | FURIN    | 31.082   | 12.0201  | 1.37063044   | 0.00016231 | Postive                  |
| gga-miR-22-3p   | 6060606.31  | 5856904.53  | 0.058890194  | 0         | C19orf70 | 20.8004  | 9.39152  | 1.147180693  | 0.00016231 | Postive                  |
| gga-miR-22-3p   | 6060606.31  | 5856904.53  | 0.058890194  | 0         | SRF      | 18.4847  | 6.94797  | 1.411668199  | 0.00016231 | Postive                  |
| gga-miR-22-3p   | 6060606.31  | 5856904.53  | 0.058890194  | 0         | MED19    | 42.6245  | 20.5396  | 1.053274825  | 0.00016231 | Postive                  |
| gga-miR-30a-5p  | 5516178.95  | 6501640.5   | -0.227568083 | 0         | XPO1     | 15.2124  | 35.4973  | -1.222461515 | 0.00016231 | Postive                  |
| gga-miR-30a-5p  | 5516178.95  | 6501640.5   | -0.227568083 | 0         | ACTC1    | 34.0831  | 88.9522  | -1.383973727 | 0.00016231 | Postive                  |
| gga-miR-30a-5p  | 5516178.95  | 6501640.5   | -0.227568083 | 0         | UBE2V2   | 12.8914  | 28.1908  | -1.128815471 | 0.00016231 | Postive                  |
| gga-miR-30a-5p  | 5516178.95  | 6501640.5   | -0.227568083 | 0         | GOLGA4   | 5.28505  | 13.4586  | -1.348539319 | 0.00016231 | Postive                  |
| gga-miR-30a-5p  | 5516178.95  | 6501640.5   | -0.227568083 | 0         | RAP1B    | 4.66868  | 10.6201  | -1.185710739 | 0.00016231 | Postive                  |
| gga-miR-30a-5p  | 5516178.95  | 6501640.5   | -0.227568083 | 0         | HSPA5    | 13.7934  | 35.2541  | -1.353812933 | 0.00016231 | Postive                  |
| gga-miR-26a-5p  | 5512392.3   | 5684205.49  | -0.034713704 | 0         | COL1A2   | 124.212  | 262.943  | -1.081945533 | 0.00016231 | Postive                  |
| gga-miR-26a-5p  | 5512392.3   | 5684205.49  | -0.034713704 | 0         | HSPA8    | 75.6842  | 422.686  | -2.481522272 | 0.00016231 | Postive                  |
| gga-miR-26a-5p  | 5512392.3   | 5684205.49  | -0.034713704 | 0         | ARL5B    | 4.65906  | 10.2645  | -1.139552538 | 0.00016231 | Postive                  |
| gga-miR-26a-5p  | 5512392.3   | 5684205.49  | -0.034713704 | 0         | PPIG     | 6.79152  | 18.4631  | -1.442838402 | 0.00016231 | Postive                  |
| gga-miR-26a-5p  | 5512392.3   | 5684205.49  | -0.034713704 | 0         | TPPP     | 3.7568   | 10.0241  | -1.415896493 | 0.00016231 | Postive                  |
| gga-miR-10a-5p  | 4289804.8   | 3459316.03  | 0.319991626  | 0         | SMCR8    | 68.3574  | 30.7539  | 1.15232815   | 0.00016231 | Postive                  |
| gga-miR-10a-5p  | 4289804.8   | 3459316.03  | 0.319991626  | 0         | SDK1     | 3.11991  | 0.916462 | 1.767357445  | 0.00016231 | Postive                  |
| gga-miR-10b-5p  | 4144516.59  | 3278815.61  | 0.347595509  | 0         | SMCR8    | 68.3574  | 30.7539  | 1.15232815   | 0.00016231 | Postive                  |
| gga-miR-10b-5p  | 4144516.59  | 3278815.61  | 0.347595509  | 0         | SDK1     | 3.11991  | 0.916462 | 1.767357445  | 0.00016231 | Postive                  |
| gga-miR-30d-5p  | 3872505.2   | 4800290.23  | -0.300288016 | 0         | XPO1     | 15.2124  | 35.4973  | -1.222461515 | 0.00016231 | Postive                  |
| gga-miR-30d-5p  | 3872505.2   | 4800290.23  | -0.300288016 | 0         | ACTC1    | 34.0831  | 88.9522  | -1.383973727 | 0.00016231 | Postive                  |
| gga-miR-30d-5p  | 3872505.2   | 4800290.23  | -0.300288016 | 0         | UBE2V2   | 12.8914  | 28.1908  | -1.128815471 | 0.00016231 | Postive                  |
| gga-miR-30d-5p  | 3872505.2   | 4800290.23  | -0.300288016 | 0         | GOLGA4   | 5.28505  | 13.4586  | -1.348539319 | 0.00016231 | Postive                  |
| gga-miR-30d-5p  | 3872505.2   | 4800290.23  | -0.300288016 | 0         | RAP1B    | 4.66868  | 10.6201  | -1.185710739 | 0.00016231 | Postive                  |
| gga-miR-30d-5p  | 3872505.2   | 4800290.23  | -0.300288016 | 0         | HSPA5    | 13.7934  | 35.2541  | -1.353812933 | 0.00016231 | Postive                  |
| gga-miR-30e-5p  | 3635178.24  | 4124439.17  | -0.172605412 | 0         | XPO1     | 15.2124  | 35.4973  | -1.222461515 | 0.00016231 | Postive                  |
| gga-miR-30e-5p  | 3635178.24  | 4124439.17  | -0.172605412 | 0         | ACTC1    | 34.0831  | 88.9522  | -1.383973727 | 0.00016231 | Postive                  |
| gga-miR-30e-5p  | 3635178.24  | 4124439.17  | -0.172605412 | 0         | UBE2V2   | 12.8914  | 28.1908  | -1.128815471 | 0.00016231 | Postive                  |
| gga-miR-30e-5p  | 3635178.24  | 4124439.17  | -0.172605412 | 0         | GOLGA4   | 5.28505  | 13.4586  | -1.348539319 | 0.00016231 | Postive                  |
| gga-miR-30e-5p  | 3635178.24  | 4124439.17  | -0.172605412 | 0         | RAP1B    | 4.66868  | 10.6201  | -1.185710739 | 0.00016231 | Postive                  |
| gga-miR-30e-5p  | 3635178.24  | 4124439.17  | -0.172605412 | 0         | HSPA5    | 13.7934  | 35.2541  | -1.353812933 | 0.00016231 | Postive                  |
| gga-miR-181a-5p | 2087579.9   | 1996273.67  | 0.074088345  | 0         | BHLHE40  | 36.8113  | 11.4009  | 1.691000983  | 0.00016231 | Postive                  |
| gga-miR-181a-5p | 2087579.9   | 1996273.67  | 0.074088345  | 0         | GOT2     | 227.843  | 71.4575  | 1.672882701  | 0.00016231 | Postive                  |
| gga-miR-181a-5p | 2087579.9   | 1996273.67  | 0.074088345  | 0         | IRS2     | 14.5185  | 2.42436  | 2.582216557  | 0.00016231 | Postive                  |
| gga-miR-181a-5p | 2087579.9   | 1996273.67  | 0.074088345  | 0         | TMCC1    | 25.5803  | 12.7855  | 1.000524603  | 0.00016231 | Postive                  |
| gga-miR-181a-5p | 2087579.9   | 1996273.67  | 0.074088345  | 0         | FOS      | 13.2273  | 5.88745  | 1.167803796  | 0.00016231 | Postive                  |
| gga-miR-181a-5p | 2087579.9   | 1996273.67  | 0.074088345  | 0         | ADM      | 16.7993  | 4.13757  | 2.021545494  | 0.00016231 | Postive                  |
| gga-miR-181a-5p | 2087579.9   | 1996273.67  | 0.074088345  | 0         | ADCY9    | 96.6021  | 45.5592  | 1.084312137  | 0.00016231 | Postive                  |
| gga-let-7j-5p   | 1933522.85  | 1763522.91  | 0.142337939  | 0         | ABCC5    | 18.0863  | 8.62963  | 1.06752669   | 0.00016231 | Postive                  |
| gga-let-7j-5p   | 1933522.85  | 1763522.91  | 0.142337939  | 0         | IRS2     | 14.5185  | 2.42436  | 2.582216557  | 0.00016231 | Postive                  |
| gga-let-7j-5p   | 1933522.85  | 1763522.91  | 0.142337939  | 0         | FBXO32   | 103.023  | 40.3665  | 1.351736049  | 0.00016231 | Postive                  |
| gga-let-7j-5p   | 1933522.85  | 1763522.91  | 0.142337939  | 0         | RBFOX2   | 175.251  | 77.2247  | 1.18228841   | 0.00016231 | Postive                  |

|                 |            |            |              |          |         |         |         |              |            |         |
|-----------------|------------|------------|--------------|----------|---------|---------|---------|--------------|------------|---------|
| gga-let-7j-5p   | 1933522.85 | 1763522.91 | 0.142337939  | 0        | KLF9    | 92.8131 | 43.0242 | 1.109180081  | 0.00016231 | Postive |
| gga-let-7j-5p   | 1933522.85 | 1763522.91 | 0.142337939  | 0        | TRIB1   | 19.8524 | 9.6717  | 1.037472028  | 0.00016231 | Postive |
| gga-let-7j-5p   | 1933522.85 | 1763522.91 | 0.142337939  | 0        | SCYL3   | 44.2791 | 19.9482 | 1.150367326  | 0.00016231 | Postive |
| gga-let-7f-5p   | 1810554.5  | 1701629.77 | 0.099080869  | 0        | ABCC5   | 18.0863 | 8.62963 | 1.06752669   | 0.00016231 | Postive |
| gga-let-7f-5p   | 1810554.5  | 1701629.77 | 0.099080869  | 0        | IRS2    | 14.5185 | 2.42436 | 2.582216557  | 0.00016231 | Postive |
| gga-let-7f-5p   | 1810554.5  | 1701629.77 | 0.099080869  | 0        | FBXO32  | 103.023 | 40.3665 | 1.351736049  | 0.00016231 | Postive |
| gga-let-7f-5p   | 1810554.5  | 1701629.77 | 0.099080869  | 0        | RBFOX2  | 175.251 | 77.2247 | 1.18228841   | 0.00016231 | Postive |
| gga-let-7f-5p   | 1810554.5  | 1701629.77 | 0.099080869  | 0        | KLF9    | 92.8131 | 43.0242 | 1.109180081  | 0.00016231 | Postive |
| gga-let-7f-5p   | 1810554.5  | 1701629.77 | 0.099080869  | 0        | TRIB1   | 19.8524 | 9.6717  | 1.037472028  | 0.00016231 | Postive |
| gga-let-7f-5p   | 1810554.5  | 1701629.77 | 0.099080869  | 0        | SCYL3   | 44.2791 | 19.9482 | 1.150367326  | 0.00016231 | Postive |
| gga-miR-148a-3p | 1311848.77 | 1183894.35 | 0.157627517  | 0        | RBM24   | 180.272 | 82.9118 | 1.120525988  | 0.00016231 | Postive |
| gga-miR-148a-3p | 1311848.77 | 1183894.35 | 0.157627517  | 0        | EIF4E3  | 11.3358 | 5.50082 | 1.043167609  | 0.00016231 | Postive |
| gga-miR-148a-3p | 1311848.77 | 1183894.35 | 0.157627517  | 0        | CDKN1B  | 67.5216 | 26.4149 | 1.353997142  | 0.00016231 | Postive |
| gga-miR-148a-3p | 1311848.77 | 1183894.35 | 0.157627517  | 0        | RBFOX2  | 175.251 | 77.2247 | 1.18228841   | 0.00016231 | Postive |
| gga-miR-148a-3p | 1311848.77 | 1183894.35 | 0.157627517  | 0        | FLOT2   | 23.3419 | 10.0952 | 1.209252507  | 0.00016231 | Postive |
| gga-let-7c-5p   | 1103087.6  | 913460.21  | 0.281700016  | 0        | ABCC5   | 18.0863 | 8.62963 | 1.06752669   | 0.00016231 | Postive |
| gga-let-7c-5p   | 1103087.6  | 913460.21  | 0.281700016  | 0        | IRS2    | 14.5185 | 2.42436 | 2.582216557  | 0.00016231 | Postive |
| gga-let-7c-5p   | 1103087.6  | 913460.21  | 0.281700016  | 0        | FBXO32  | 103.023 | 40.3665 | 1.351736049  | 0.00016231 | Postive |
| gga-let-7c-5p   | 1103087.6  | 913460.21  | 0.281700016  | 0        | RBFOX2  | 175.251 | 77.2247 | 1.18228841   | 0.00016231 | Postive |
| gga-let-7c-5p   | 1103087.6  | 913460.21  | 0.281700016  | 0        | KLF9    | 92.8131 | 43.0242 | 1.109180081  | 0.00016231 | Postive |
| gga-let-7c-5p   | 1103087.6  | 913460.21  | 0.281700016  | 0        | TRIB1   | 19.8524 | 9.6717  | 1.037472028  | 0.00016231 | Postive |
| gga-let-7c-5p   | 1103087.6  | 913460.21  | 0.281700016  | 0        | SCYL3   | 44.2791 | 19.9482 | 1.150367326  | 0.00016231 | Postive |
| gga-miR-92-3p   | 543713.66  | 539248.81  | 0.021462429  | 2.80E-14 | TGIF1   | 11.6257 | 5.20682 | 1.158843147  | 0.00016231 | Postive |
| gga-miR-92-3p   | 543713.66  | 539248.81  | 0.021462429  | 2.80E-14 | RBFOX2  | 175.251 | 77.2247 | 1.18228841   | 0.00016231 | Postive |
| gga-miR-92-3p   | 543713.66  | 539248.81  | 0.021462429  | 2.80E-14 | CDKN1B  | 67.5216 | 26.4149 | 1.353997142  | 0.00016231 | Postive |
| gga-miR-92-3p   | 543713.66  | 539248.81  | 0.021462429  | 2.80E-14 | IRS2    | 14.5185 | 2.42436 | 2.582216557  | 0.00016231 | Postive |
| gga-miR-92-3p   | 543713.66  | 539248.81  | 0.021462429  | 2.80E-14 | FBXO32  | 103.023 | 40.3665 | 1.351736049  | 0.00016231 | Postive |
| gga-miR-92-3p   | 543713.66  | 539248.81  | 0.021462429  | 2.80E-14 | PMEP1   | 10.6419 | 3.70473 | 1.522315444  | 0.00016231 | Postive |
| gga-miR-92-3p   | 543713.66  | 539248.81  | 0.021462429  | 2.80E-14 | ZDHHC5  | 10.5734 | 4.45897 | 1.245656968  | 0.00016231 | Postive |
| gga-miR-92-3p   | 543713.66  | 539248.81  | 0.021462429  | 2.80E-14 | SSBP3   | 24.3683 | 8.9378  | 1.447013941  | 0.00016231 | Postive |
| gga-miR-92-3p   | 543713.66  | 539248.81  | 0.021462429  | 2.80E-14 | TMCC1   | 25.5803 | 12.7855 | 1.000524603  | 0.00016231 | Postive |
| gga-miR-27b-3p  | 494682.7   | 459171.63  | 0.117036382  | 0        | ZBTB42  | 15.7169 | 6.99129 | 1.168686104  | 0.00016231 | Postive |
| gga-miR-27b-3p  | 494682.7   | 459171.63  | 0.117036382  | 0        | FAM78A  | 25.2244 | 10.4459 | 1.271883155  | 0.00016231 | Postive |
| gga-miR-27b-3p  | 494682.7   | 459171.63  | 0.117036382  | 0        | SEMA7A  | 23.4429 | 10.57   | 1.149175672  | 0.00016231 | Postive |
| gga-miR-27b-3p  | 494682.7   | 459171.63  | 0.117036382  | 0        | TMCC1   | 25.5803 | 12.7855 | 1.000524603  | 0.00016231 | Postive |
| gga-miR-27b-3p  | 494682.7   | 459171.63  | 0.117036382  | 0        | MN1     | 51.1796 | 23.2701 | 1.137091461  | 0.00016231 | Postive |
| gga-miR-27b-3p  | 494682.7   | 459171.63  | 0.117036382  | 0        | ROR1    | 20.7457 | 10.1095 | 1.037100692  | 0.00016231 | Postive |
| gga-miR-27b-3p  | 494682.7   | 459171.63  | 0.117036382  | 0        | IRS1    | 129.587 | 37.5296 | 1.787820177  | 0.00016231 | Postive |
| gga-miR-21-5p   | 489673.23  | 288873.02  | 0.770950304  | 0        | DUSP8   | 17.9613 | 8.31334 | 1.111391652  | 0.00016231 | Postive |
| gga-miR-101-3p  | 474140.24  | 401158.63  | 0.250707448  | 0        | CBFA2T2 | 21.8448 | 7.18698 | 1.603832321  | 0.00016231 | Postive |
| gga-miR-101-3p  | 474140.24  | 401158.63  | 0.250707448  | 0        | KLF9    | 92.8131 | 43.0242 | 1.109180081  | 0.00016231 | Postive |
| gga-miR-101-3p  | 474140.24  | 401158.63  | 0.250707448  | 0        | FOS     | 13.2273 | 5.88745 | 1.167803796  | 0.00016231 | Postive |
| gga-miR-101-3p  | 474140.24  | 401158.63  | 0.250707448  | 0        | TGIF1   | 11.6257 | 5.20682 | 1.158843147  | 0.00016231 | Postive |
| gga-miR-101-3p  | 474140.24  | 401158.63  | 0.250707448  | 0        | CASKIN2 | 13.1438 | 5.73164 | 1.19736253   | 0.00016231 | Postive |
| gga-miR-101-3p  | 474140.24  | 401158.63  | 0.250707448  | 0        | AHCYL2  | 26.693  | 12.0942 | 1.142146116  | 0.00016231 | Postive |
| gga-miR-101-3p  | 474140.24  | 401158.63  | 0.250707448  | 0        | NCOA1   | 11.8492 | 4.81143 | 1.300252014  | 0.00016231 | Postive |
| gga-miR-101-3p  | 474140.24  | 401158.63  | 0.250707448  | 0        | RXRA    | 58.7086 | 24.9276 | 1.235827865  | 0.00016231 | Postive |
| gga-miR-100-5p  | 464966.83  | 276139.26  | 0.761298226  | 0        | FZD8    | 12.1101 | 4.16917 | 1.538378673  | 0.00016231 | Postive |
| gga-miR-30c-5p  | 450797.58  | 568867.75  | -0.326047081 | 0        | XPO1    | 15.2124 | 35.4973 | -1.222461515 | 0.00016231 | Postive |
| gga-miR-30c-5p  | 450797.58  | 568867.75  | -0.326047081 | 0        | ACTC1   | 34.0831 | 88.9522 | -1.383973727 | 0.00016231 | Postive |
| gga-miR-30c-5p  | 450797.58  | 568867.75  | -0.326047081 | 0        | UBE2V2  | 12.8914 | 28.1908 | -1.128815471 | 0.00016231 | Postive |

|                 |           |           |              |          |          |         |         |              |            |         |
|-----------------|-----------|-----------|--------------|----------|----------|---------|---------|--------------|------------|---------|
| gga-miR-30c-5p  | 450797.58 | 568867.75 | -0.326047081 | 0        | GOLGA4   | 5.28505 | 13.4586 | -1.348539319 | 0.00016231 | Postive |
| gga-miR-30c-5p  | 450797.58 | 568867.75 | -0.326047081 | 0        | RAP1B    | 4.66868 | 10.6201 | -1.185710739 | 0.00016231 | Postive |
| gga-miR-30c-5p  | 450797.58 | 568867.75 | -0.326047081 | 0        | HSPA5    | 13.7934 | 35.2541 | -1.353812933 | 0.00016231 | Postive |
| gga-miR-125b-5p | 404462.27 | 285609.43 | 0.511527957  | 0        | RBM24    | 180.272 | 82.9118 | 1.120525988  | 0.00016231 | Postive |
| gga-let-7b-5p   | 372600.78 | 329030.81 | 0.188974455  | 0        | ABCC5    | 18.0863 | 8.62963 | 1.06752669   | 0.00016231 | Postive |
| gga-let-7b-5p   | 372600.78 | 329030.81 | 0.188974455  | 0        | IRS2     | 14.5185 | 2.42436 | 2.582216557  | 0.00016231 | Postive |
| gga-let-7b-5p   | 372600.78 | 329030.81 | 0.188974455  | 0        | FBXO32   | 103.023 | 40.3665 | 1.351736049  | 0.00016231 | Postive |
| gga-let-7b-5p   | 372600.78 | 329030.81 | 0.188974455  | 0        | RBFOX2   | 175.251 | 77.2247 | 1.18228841   | 0.00016231 | Postive |
| gga-let-7b-5p   | 372600.78 | 329030.81 | 0.188974455  | 0        | KLF9     | 92.8131 | 43.0242 | 1.109180081  | 0.00016231 | Postive |
| gga-let-7b-5p   | 372600.78 | 329030.81 | 0.188974455  | 0        | TRIB1    | 19.8524 | 9.6717  | 1.037472028  | 0.00016231 | Postive |
| gga-let-7b-5p   | 372600.78 | 329030.81 | 0.188974455  | 0        | SCYL3    | 44.2791 | 19.9482 | 1.150367326  | 0.00016231 | Postive |
| gga-miR-1a-3p   | 362868.23 | 438537.85 | -0.263689173 | 0        | HSP90B1  | 12.235  | 48.3257 | -1.981776529 | 0.00016231 | Postive |
| gga-miR-1a-3p   | 362868.23 | 438537.85 | -0.263689173 | 0        | SEC62    | 6.27578 | 13.3639 | -1.090474408 | 0.00016231 | Postive |
| gga-miR-1a-3p   | 362868.23 | 438537.85 | -0.263689173 | 0        | HSPD1    | 37.1698 | 74.4062 | -1.001291915 | 0.00016231 | Postive |
| gga-miR-1a-3p   | 362868.23 | 438537.85 | -0.263689173 | 0        | HNRNPA3  | 6.80745 | 18.0362 | -1.405709027 | 0.00016231 | Postive |
| gga-miR-1a-3p   | 362868.23 | 438537.85 | -0.263689173 | 0        | RAP1B    | 4.66868 | 10.6201 | -1.185710739 | 0.00016231 | Postive |
| gga-miR-99a-5p  | 350453.66 | 211155.16 | 0.740486631  | 0        | FZD8     | 12.1101 | 4.16917 | 1.538378673  | 0.00016231 | Postive |
| gga-miR-1b-3p   | 311723.47 | 376965.31 | -0.264598543 | 0        | HSP90B1  | 12.235  | 48.3257 | -1.981776529 | 0.00016231 | Postive |
| gga-miR-1b-3p   | 311723.47 | 376965.31 | -0.264598543 | 0        | SEC62    | 6.27578 | 13.3639 | -1.090474408 | 0.00016231 | Postive |
| gga-miR-1b-3p   | 311723.47 | 376965.31 | -0.264598543 | 0        | HSPD1    | 37.1698 | 74.4062 | -1.001291915 | 0.00016231 | Postive |
| gga-miR-1b-3p   | 311723.47 | 376965.31 | -0.264598543 | 0        | HNRNPA3  | 6.80745 | 18.0362 | -1.405709027 | 0.00016231 | Postive |
| gga-miR-1b-3p   | 311723.47 | 376965.31 | -0.264598543 | 0        | RAP1B    | 4.66868 | 10.6201 | -1.185710739 | 0.00016231 | Postive |
| gga-let-7i      | 271147.69 | 318697.47 | -0.223542244 | 0        | COL1A2   | 124.212 | 262.943 | -1.081945533 | 0.00016231 | Postive |
| gga-let-7i      | 271147.69 | 318697.47 | -0.223542244 | 0        | COL5A2   | 22.4483 | 47.8186 | -1.090965698 | 0.00016231 | Postive |
| gga-let-7i      | 271147.69 | 318697.47 | -0.223542244 | 0        | VASH2    | 7.33012 | 14.702  | -1.004103705 | 0.00016231 | Postive |
| gga-miR-30a-3p  | 161784.91 | 204077.2  | -0.325471516 | 0        | SUV420H1 | 7.31529 | 14.8195 | -1.01850981  | 0.00016231 | Postive |
| gga-miR-30a-3p  | 161784.91 | 204077.2  | -0.325471516 | 0        | LMNB2    | 8.63363 | 19.0617 | -1.142637619 | 0.00016231 | Postive |
| gga-miR-30a-3p  | 161784.91 | 204077.2  | -0.325471516 | 0        | ROCK2    | 50.0104 | 104.56  | -1.064030997 | 0.00016231 | Postive |
| gga-miR-30a-3p  | 161784.91 | 204077.2  | -0.325471516 | 0        | DCUN1D5  | 14.6026 | 34.1085 | -1.223906046 | 0.00016231 | Postive |
| gga-let-7g-5p   | 161712.18 | 156890.77 | 0.053234308  | 7.39E-25 | ABCC5    | 18.0863 | 8.62963 | 1.06752669   | 0.00016231 | Postive |
| gga-let-7g-5p   | 161712.18 | 156890.77 | 0.053234308  | 7.39E-25 | IRS2     | 14.5185 | 2.42436 | 2.582216557  | 0.00016231 | Postive |
| gga-let-7g-5p   | 161712.18 | 156890.77 | 0.053234308  | 7.39E-25 | FBXO32   | 103.023 | 40.3665 | 1.351736049  | 0.00016231 | Postive |
| gga-let-7g-5p   | 161712.18 | 156890.77 | 0.053234308  | 7.39E-25 | RBFOX2   | 175.251 | 77.2247 | 1.18228841   | 0.00016231 | Postive |
| gga-let-7g-5p   | 161712.18 | 156890.77 | 0.053234308  | 7.39E-25 | KLF9     | 92.8131 | 43.0242 | 1.109180081  | 0.00016231 | Postive |
| gga-let-7g-5p   | 161712.18 | 156890.77 | 0.053234308  | 7.39E-25 | TRIB1    | 19.8524 | 9.6717  | 1.037472028  | 0.00016231 | Postive |
| gga-let-7g-5p   | 161712.18 | 156890.77 | 0.053234308  | 7.39E-25 | SCYL3    | 44.2791 | 19.9482 | 1.150367326  | 0.00016231 | Postive |
| gga-miR-199-5p  | 157089.1  | 112030.78 | 0.497254361  | 0        | USP31    | 12.5615 | 5.98806 | 1.068848168  | 0.00016231 | Postive |
| gga-miR-199-5p  | 157089.1  | 112030.78 | 0.497254361  | 0        | ZBTB42   | 15.7169 | 6.99129 | 1.168686104  | 0.00016231 | Postive |
| gga-miR-199-5p  | 157089.1  | 112030.78 | 0.497254361  | 0        | CCNL1    | 30.6763 | 13.2045 | 1.21609481   | 0.00016231 | Postive |
| gga-miR-199-5p  | 157089.1  | 112030.78 | 0.497254361  | 0        | MN1      | 51.1796 | 23.2701 | 1.137091461  | 0.00016231 | Postive |
| gga-miR-199-5p  | 157089.1  | 112030.78 | 0.497254361  | 0        | RBM24    | 180.272 | 82.9118 | 1.120525988  | 0.00016231 | Postive |
| gga-miR-199-5p  | 157089.1  | 112030.78 | 0.497254361  | 0        | PURA     | 37.3771 | 8.76602 | 2.092160763  | 0.00016231 | Postive |
| gga-miR-142-5p  | 108462.71 | 54058.88  | 1.014162038  | 0        | RBM24    | 180.272 | 82.9118 | 1.120525988  | 0.00016231 | Postive |
| gga-miR-142-5p  | 108462.71 | 54058.88  | 1.014162038  | 0        | FOXO3    | 237.178 | 107.708 | 1.138844786  | 0.00016231 | Postive |
| gga-miR-181b-5p | 104412.41 | 123095.75 | -0.227921315 | 0        | RAP1B    | 4.66868 | 10.6201 | -1.185710739 | 0.00016231 | Postive |
| gga-miR-181b-5p | 104412.41 | 123095.75 | -0.227921315 | 0        | ROCK2    | 50.0104 | 104.56  | -1.064030997 | 0.00016231 | Postive |
| gga-miR-181b-5p | 104412.41 | 123095.75 | -0.227921315 | 0        | FAM13B   | 8.2073  | 23.1809 | -1.497956986 | 0.00016231 | Postive |
| gga-miR-181b-5p | 104412.41 | 123095.75 | -0.227921315 | 0        | HSP90B1  | 12.235  | 48.3257 | -1.981776529 | 0.00016231 | Postive |
| gga-miR-181b-5p | 104412.41 | 123095.75 | -0.227921315 | 0        | AFAP1    | 5.24484 | 10.6248 | -1.018465017 | 0.00016231 | Postive |
| gga-miR-181b-5p | 104412.41 | 123095.75 | -0.227921315 | 0        | HSPA5    | 13.7934 | 35.2541 | -1.353812933 | 0.00016231 | Postive |
| gga-miR-181b-5p | 104412.41 | 123095.75 | -0.227921315 | 0        | SLC25A25 | 4.46225 | 10.4111 | -1.222279258 | 0.00016231 | Postive |

|                 |          |           |              |           |          |         |         |              |            |         |
|-----------------|----------|-----------|--------------|-----------|----------|---------|---------|--------------|------------|---------|
| gga-miR-128-3p  | 99089.28 | 110172.91 | -0.143402193 | 1.43E-113 | RAP1B    | 4.66868 | 10.6201 | -1.185710739 | 0.00016231 | Postive |
| gga-miR-128-3p  | 99089.28 | 110172.91 | -0.143402193 | 1.43E-113 | FAM133B  | 25.6715 | 55.0215 | -1.099827875 | 0.00016231 | Postive |
| gga-miR-128-3p  | 99089.28 | 110172.91 | -0.143402193 | 1.43E-113 | CKAP4    | 6.53584 | 17.7989 | -1.445343512 | 0.00016231 | Postive |
| gga-miR-130a-3p | 95161.71 | 100513.67 | -0.069372179 | 7.62E-26  | INSIG1   | 30.6869 | 105.105 | -1.776136485 | 0.00016231 | Postive |
| gga-miR-130a-3p | 95161.71 | 100513.67 | -0.069372179 | 7.62E-26  | HSPA8    | 75.6842 | 422.686 | -2.481522272 | 0.00016231 | Postive |
| gga-miR-130a-3p | 95161.71 | 100513.67 | -0.069372179 | 7.62E-26  | CMPK1    | 3.72517 | 8.30612 | -1.15686845  | 0.00016231 | Postive |
| gga-miR-130a-3p | 95161.71 | 100513.67 | -0.069372179 | 7.62E-26  | SUV420H1 | 7.31529 | 14.8195 | -1.01850981  | 0.00016231 | Postive |
| gga-miR-130a-3p | 95161.71 | 100513.67 | -0.069372179 | 7.62E-26  | ROCK2    | 50.0104 | 104.56  | -1.064030997 | 0.00016231 | Postive |
| gga-miR-130a-3p | 95161.71 | 100513.67 | -0.069372179 | 7.62E-26  | ATRX     | 6.13736 | 15.9346 | -1.376472689 | 0.00016231 | Postive |
| gga-miR-130c-3p | 95061.7  | 101023.35 | -0.078186239 | 1.45E-32  | INSIG1   | 30.6869 | 105.105 | -1.776136485 | 0.00016231 | Postive |
| gga-miR-130c-3p | 95061.7  | 101023.35 | -0.078186239 | 1.45E-32  | HSPA8    | 75.6842 | 422.686 | -2.481522272 | 0.00016231 | Postive |
| gga-miR-130c-3p | 95061.7  | 101023.35 | -0.078186239 | 1.45E-32  | CMPK1    | 3.72517 | 8.30612 | -1.15686845  | 0.00016231 | Postive |
| gga-miR-130c-3p | 95061.7  | 101023.35 | -0.078186239 | 1.45E-32  | SUV420H1 | 7.31529 | 14.8195 | -1.01850981  | 0.00016231 | Postive |
| gga-miR-130c-3p | 95061.7  | 101023.35 | -0.078186239 | 1.45E-32  | ROCK2    | 50.0104 | 104.56  | -1.064030997 | 0.00016231 | Postive |
| gga-miR-130c-3p | 95061.7  | 101023.35 | -0.078186239 | 1.45E-32  | ATRX     | 6.13736 | 15.9346 | -1.376472689 | 0.00016231 | Postive |
| gga-miR-23b-3p  | 83219.9  | 103843.03 | -0.309837482 | 0         | ARHGAP5  | 9.52823 | 20.7222 | -1.120897033 | 0.00016231 | Postive |
| gga-miR-23b-3p  | 83219.9  | 103843.03 | -0.309837482 | 0         | FBN1     | 26.6076 | 54.9951 | -1.047464696 | 0.00016231 | Postive |
| gga-miR-23b-3p  | 83219.9  | 103843.03 | -0.309837482 | 0         | SUV420H1 | 7.31529 | 14.8195 | -1.01850981  | 0.00016231 | Postive |
| gga-miR-23b-3p  | 83219.9  | 103843.03 | -0.309837482 | 0         | RAP1B    | 4.66868 | 10.6201 | -1.185710739 | 0.00016231 | Postive |
| gga-miR-15c-5p  | 78633.19 | 83587.39  | -0.078580488 | 2.09E-27  | MYLK4    | 74.76   | 168.484 | -1.172273119 | 0.00016231 | Postive |
| gga-miR-15c-5p  | 78633.19 | 83587.39  | -0.078580488 | 2.09E-27  | ARHGAP5  | 9.52823 | 20.7222 | -1.120897033 | 0.00016231 | Postive |
| gga-miR-15c-5p  | 78633.19 | 83587.39  | -0.078580488 | 2.09E-27  | FAM133B  | 25.6715 | 55.0215 | -1.099827875 | 0.00016231 | Postive |
| gga-miR-15c-5p  | 78633.19 | 83587.39  | -0.078580488 | 2.09E-27  | LRRFP2   | 22.1577 | 55.09   | -1.313982327 | 0.00016231 | Postive |
| gga-miR-15c-5p  | 78633.19 | 83587.39  | -0.078580488 | 2.09E-27  | VAPB     | 11.1896 | 23.6654 | -1.080620843 | 0.00016231 | Postive |
| gga-miR-15c-5p  | 78633.19 | 83587.39  | -0.078580488 | 2.09E-27  | CMPK1    | 3.72517 | 8.30612 | -1.15686845  | 0.00016231 | Postive |
| gga-miR-2964    | 75060.2  | 62386.38  | 0.276383478  | 2.63E-274 | SRSF2    | 22.0181 | 6.40417 | 1.78160647   | 0.00016231 | Postive |
| gga-miR-2964    | 75060.2  | 62386.38  | 0.276383478  | 2.63E-274 | SMCR8    | 68.3574 | 30.7539 | 1.15232815   | 0.00016231 | Postive |
| gga-miR-30b-5p  | 70087.1  | 84269.7   | -0.256298615 | 5.43E-265 | XPO1     | 15.2124 | 35.4973 | -1.222461515 | 0.00016231 | Postive |
| gga-miR-30b-5p  | 70087.1  | 84269.7   | -0.256298615 | 5.43E-265 | ACTC1    | 34.0831 | 88.9522 | -1.383973727 | 0.00016231 | Postive |
| gga-miR-30b-5p  | 70087.1  | 84269.7   | -0.256298615 | 5.43E-265 | UBE2V2   | 12.8914 | 28.1908 | -1.128815471 | 0.00016231 | Postive |
| gga-miR-30b-5p  | 70087.1  | 84269.7   | -0.256298615 | 5.43E-265 | GOLGA4   | 5.28505 | 13.4586 | -1.348539319 | 0.00016231 | Postive |
| gga-miR-30b-5p  | 70087.1  | 84269.7   | -0.256298615 | 5.43E-265 | RAP1B    | 4.66868 | 10.6201 | -1.185710739 | 0.00016231 | Postive |
| gga-miR-30b-5p  | 70087.1  | 84269.7   | -0.256298615 | 5.43E-265 | HSPA5    | 13.7934 | 35.2541 | -1.353812933 | 0.00016231 | Postive |
| gga-miR-15a     | 66127.71 | 71018.04  | -0.09336416  | 1.80E-32  | MYLK4    | 74.76   | 168.484 | -1.172273119 | 0.00016231 | Postive |
| gga-miR-15a     | 66127.71 | 71018.04  | -0.09336416  | 1.80E-32  | ARHGAP5  | 9.52823 | 20.7222 | -1.120897033 | 0.00016231 | Postive |
| gga-miR-15a     | 66127.71 | 71018.04  | -0.09336416  | 1.80E-32  | FAM133B  | 25.6715 | 55.0215 | -1.099827875 | 0.00016231 | Postive |
| gga-miR-15a     | 66127.71 | 71018.04  | -0.09336416  | 1.80E-32  | LRRFP2   | 22.1577 | 55.09   | -1.313982327 | 0.00016231 | Postive |
| gga-miR-15a     | 66127.71 | 71018.04  | -0.09336416  | 1.80E-32  | VAPB     | 11.1896 | 23.6654 | -1.080620843 | 0.00016231 | Postive |
| gga-miR-15a     | 66127.71 | 71018.04  | -0.09336416  | 1.80E-32  | CMPK1    | 3.72517 | 8.30612 | -1.15686845  | 0.00016231 | Postive |
| gga-miR-19b-3p  | 61345.53 | 77980.92  | -0.336596508 | 0         | RAP1B    | 4.66868 | 10.6201 | -1.185710739 | 0.00016231 | Postive |
| gga-miR-19b-3p  | 61345.53 | 77980.92  | -0.336596508 | 0         | INSIG1   | 30.6869 | 105.105 | -1.776136485 | 0.00016231 | Postive |
| gga-miR-19b-3p  | 61345.53 | 77980.92  | -0.336596508 | 0         | ARHGAP5  | 9.52823 | 20.7222 | -1.120897033 | 0.00016231 | Postive |
| gga-miR-19b-3p  | 61345.53 | 77980.92  | -0.336596508 | 0         | ATRX     | 6.13736 | 15.9346 | -1.376472689 | 0.00016231 | Postive |
| gga-miR-19a-3p  | 59718.13 | 75391.42  | -0.326664913 | 0         | RAP1B    | 4.66868 | 10.6201 | -1.185710739 | 0.00016231 | Postive |
| gga-miR-19a-3p  | 59718.13 | 75391.42  | -0.326664913 | 0         | INSIG1   | 30.6869 | 105.105 | -1.776136485 | 0.00016231 | Postive |
| gga-miR-19a-3p  | 59718.13 | 75391.42  | -0.326664913 | 0         | ARHGAP5  | 9.52823 | 20.7222 | -1.120897033 | 0.00016231 | Postive |
| gga-miR-19a-3p  | 59718.13 | 75391.42  | -0.326664913 | 0         | ATRX     | 6.13736 | 15.9346 | -1.376472689 | 0.00016231 | Postive |
| gga-miR-107-3p  | 57663.43 | 59591.36  | -0.037880075 | 1.61E-05  | ARHGAP5  | 9.52823 | 20.7222 | -1.120897033 | 0.00016231 | Postive |
| gga-miR-16-5p   | 56158.77 | 85642.55  | -0.599249972 | 0         | MYLK4    | 74.76   | 168.484 | -1.172273119 | 0.00016231 | Postive |
| gga-miR-16-5p   | 56158.77 | 85642.55  | -0.599249972 | 0         | ARHGAP5  | 9.52823 | 20.7222 | -1.120897033 | 0.00016231 | Postive |
| gga-miR-16-5p   | 56158.77 | 85642.55  | -0.599249972 | 0         | FAM133B  | 25.6715 | 55.0215 | -1.099827875 | 0.00016231 | Postive |

|                 |          |          |              |          |          |         |         |              |            |         |
|-----------------|----------|----------|--------------|----------|----------|---------|---------|--------------|------------|---------|
| gga-miR-16-5p   | 56158.77 | 85642.55 | -0.599249972 | 0        | LRRFIP2  | 22.1577 | 55.09   | -1.313982327 | 0.00016231 | Postive |
| gga-miR-16-5p   | 56158.77 | 85642.55 | -0.599249972 | 0        | VAPB     | 11.1896 | 23.6654 | -1.080620843 | 0.00016231 | Postive |
| gga-miR-16-5p   | 56158.77 | 85642.55 | -0.599249972 | 0        | CMPK1    | 3.72517 | 8.30612 | -1.15686845  | 0.00016231 | Postive |
| gga-miR-15b-5p  | 52240.3  | 54724.75 | -0.057463834 | 2.08E-10 | MYLK4    | 74.76   | 168.484 | -1.172273119 | 0.00016231 | Postive |
| gga-miR-15b-5p  | 52240.3  | 54724.75 | -0.057463834 | 2.08E-10 | ARHGAP5  | 9.52823 | 20.7222 | -1.120897033 | 0.00016231 | Postive |
| gga-miR-15b-5p  | 52240.3  | 54724.75 | -0.057463834 | 2.08E-10 | FAM133B  | 25.6715 | 55.0215 | -1.099827875 | 0.00016231 | Postive |
| gga-miR-15b-5p  | 52240.3  | 54724.75 | -0.057463834 | 2.08E-10 | LRRFIP2  | 22.1577 | 55.09   | -1.313982327 | 0.00016231 | Postive |
| gga-miR-15b-5p  | 52240.3  | 54724.75 | -0.057463834 | 2.08E-10 | VAPB     | 11.1896 | 23.6654 | -1.080620843 | 0.00016231 | Postive |
| gga-miR-15b-5p  | 52240.3  | 54724.75 | -0.057463834 | 2.08E-10 | CMPK1    | 3.72517 | 8.30612 | -1.15686845  | 0.00016231 | Postive |
| gga-miR-221-3p  | 50108.32 | 48024.93 | 0.070833101  | 4.73E-14 | CDKN1B   | 67.5216 | 26.4149 | 1.353997142  | 0.00016231 | Postive |
| gga-miR-221-3p  | 50108.32 | 48024.93 | 0.070833101  | 4.73E-14 | FOS      | 13.2273 | 5.88745 | 1.167803796  | 0.00016231 | Postive |
| gga-miR-221-3p  | 50108.32 | 48024.93 | 0.070833101  | 4.73E-14 | TMCC1    | 25.5803 | 12.7855 | 1.000524603  | 0.00016231 | Postive |
| gga-miR-221-3p  | 50108.32 | 48024.93 | 0.070833101  | 4.73E-14 | RBM24    | 180.272 | 82.9118 | 1.120525988  | 0.00016231 | Postive |
| gga-miR-221-3p  | 50108.32 | 48024.93 | 0.070833101  | 4.73E-14 | SRSF2    | 22.0181 | 6.40417 | 1.78160647   | 0.00016231 | Postive |
| gga-miR-221-3p  | 50108.32 | 48024.93 | 0.070833101  | 4.73E-14 | FOXO3    | 237.178 | 107.708 | 1.138844786  | 0.00016231 | Postive |
| gga-miR-2188-5p | 39066.58 | 37420.32 | 0.07167951   | 1.91E-11 | JUN      | 93.5169 | 37.6863 | 1.311186947  | 0.00016231 | Postive |
| gga-miR-2188-5p | 39066.58 | 37420.32 | 0.07167951   | 1.91E-11 | PURA     | 37.3771 | 8.76602 | 2.092160763  | 0.00016231 | Postive |
| gga-miR-222a    | 31511.46 | 36959.96 | -0.220520153 | 5.73E-88 | VAPB     | 11.1896 | 23.6654 | -1.080620843 | 0.00016231 | Postive |
| gga-miR-222a    | 31511.46 | 36959.96 | -0.220520153 | 5.73E-88 | PNRC2    | 6.9864  | 19.5883 | -1.487371046 | 0.00016231 | Postive |
| gga-miR-365-3p  | 27974.83 | 26158.05 | 0.10644081   | 3.39E-17 | ADM      | 16.7993 | 4.13757 | 2.021545494  | 0.00016231 | Postive |
| gga-miR-454-3p  | 26265.61 | 42837.71 | -0.696139826 | 0        | INSIG1   | 30.6869 | 105.105 | -1.776136485 | 0.00016231 | Postive |
| gga-miR-454-3p  | 26265.61 | 42837.71 | -0.696139826 | 0        | CMPK1    | 3.72517 | 8.30612 | -1.15686845  | 0.00016231 | Postive |
| gga-miR-454-3p  | 26265.61 | 42837.71 | -0.696139826 | 0        | SUV420H1 | 7.31529 | 14.8195 | -1.01850981  | 0.00016231 | Postive |
| gga-miR-454-3p  | 26265.61 | 42837.71 | -0.696139826 | 0        | ROCK2    | 50.0104 | 104.56  | -1.064030997 | 0.00016231 | Postive |
| gga-miR-454-3p  | 26265.61 | 42837.71 | -0.696139826 | 0        | ATRX     | 6.13736 | 15.9346 | -1.376472689 | 0.00016231 | Postive |
| gga-miR-206     | 26129.24 | 36261.21 | -0.463195462 | 0        | HSP90B1  | 12.235  | 48.3257 | -1.981776529 | 0.00016231 | Postive |
| gga-miR-206     | 26129.24 | 36261.21 | -0.463195462 | 0        | SEC62    | 6.27578 | 13.3639 | -1.090474408 | 0.00016231 | Postive |
| gga-miR-206     | 26129.24 | 36261.21 | -0.463195462 | 0        | HSPD1    | 37.1698 | 74.4062 | -1.001291915 | 0.00016231 | Postive |
| gga-miR-206     | 26129.24 | 36261.21 | -0.463195462 | 0        | HNRNPA3  | 6.80745 | 18.0362 | -1.405709027 | 0.00016231 | Postive |
| gga-miR-206     | 26129.24 | 36261.21 | -0.463195462 | 0        | RAP1B    | 4.66868 | 10.6201 | -1.185710739 | 0.00016231 | Postive |
| gga-miR-17-5p   | 23906.35 | 28303.64 | -0.234027283 | 1.05E-75 | TRIP11   | 4.70797 | 11.8021 | -1.325866555 | 0.00016231 | Postive |
| gga-miR-17-5p   | 23906.35 | 28303.64 | -0.234027283 | 1.05E-75 | FAM129A  | 5.49809 | 12.1854 | -1.148151182 | 0.00016231 | Postive |
| gga-miR-17-5p   | 23906.35 | 28303.64 | -0.234027283 | 1.05E-75 | VASH2    | 7.33012 | 14.702  | -1.004103705 | 0.00016231 | Postive |
| gga-miR-17-5p   | 23906.35 | 28303.64 | -0.234027283 | 1.05E-75 | CMPK1    | 3.72517 | 8.30612 | -1.15686845  | 0.00016231 | Postive |
| gga-miR-17-5p   | 23906.35 | 28303.64 | -0.234027283 | 1.05E-75 | TPPP     | 3.7568  | 10.0241 | -1.415896493 | 0.00016231 | Postive |
| gga-miR-24-3p   | 18037.72 | 29569.61 | -0.703531782 | 0        | RAP1B    | 4.66868 | 10.6201 | -1.185710739 | 0.00016231 | Postive |
| gga-miR-24-3p   | 18037.72 | 29569.61 | -0.703531782 | 0        | INSIG1   | 30.6869 | 105.105 | -1.776136485 | 0.00016231 | Postive |
| gga-miR-20a-5p  | 17755.88 | 20913.29 | -0.226556733 | 6.19E-53 | TRIP11   | 4.70797 | 11.8021 | -1.325866555 | 0.00016231 | Postive |
| gga-miR-20a-5p  | 17755.88 | 20913.29 | -0.226556733 | 6.19E-53 | VASH2    | 7.33012 | 14.702  | -1.004103705 | 0.00016231 | Postive |
| gga-miR-20a-5p  | 17755.88 | 20913.29 | -0.226556733 | 6.19E-53 | FAM129A  | 5.49809 | 12.1854 | -1.148151182 | 0.00016231 | Postive |
| gga-miR-20a-5p  | 17755.88 | 20913.29 | -0.226556733 | 6.19E-53 | CMPK1    | 3.72517 | 8.30612 | -1.15686845  | 0.00016231 | Postive |
| gga-miR-20a-5p  | 17755.88 | 20913.29 | -0.226556733 | 6.19E-53 | TPPP     | 3.7568  | 10.0241 | -1.415896493 | 0.00016231 | Postive |
| gga-miR-106-5p  | 15701.18 | 19647.31 | -0.313892371 | 1.17E-91 | TRIP11   | 4.70797 | 11.8021 | -1.325866555 | 0.00016231 | Postive |
| gga-miR-106-5p  | 15701.18 | 19647.31 | -0.313892371 | 1.17E-91 | FAM129A  | 5.49809 | 12.1854 | -1.148151182 | 0.00016231 | Postive |
| gga-miR-106-5p  | 15701.18 | 19647.31 | -0.313892371 | 1.17E-91 | VASH2    | 7.33012 | 14.702  | -1.004103705 | 0.00016231 | Postive |
| gga-miR-106-5p  | 15701.18 | 19647.31 | -0.313892371 | 1.17E-91 | CMPK1    | 3.72517 | 8.30612 | -1.15686845  | 0.00016231 | Postive |
| gga-miR-106-5p  | 15701.18 | 19647.31 | -0.313892371 | 1.17E-91 | TPPP     | 3.7568  | 10.0241 | -1.415896493 | 0.00016231 | Postive |
| gga-miR-29a-3p  | 11632.69 | 9782.55  | 0.25946871   | 9.25E-39 | MAPRE2   | 88.9765 | 40.2294 | 1.145174128  | 0.00016231 | Postive |
| gga-miR-29a-3p  | 11632.69 | 9782.55  | 0.25946871   | 9.25E-39 | FOS      | 13.2273 | 5.88745 | 1.167803796  | 0.00016231 | Postive |
| gga-miR-29a-3p  | 11632.69 | 9782.55  | 0.25946871   | 9.25E-39 | USP31    | 12.5615 | 5.98806 | 1.068848168  | 0.00016231 | Postive |
| gga-miR-29a-3p  | 11632.69 | 9782.55  | 0.25946871   | 9.25E-39 | FOXO3    | 237.178 | 107.708 | 1.138844786  | 0.00016231 | Postive |

|                 |          |          |              |           |          |         |         |              |            |         |
|-----------------|----------|----------|--------------|-----------|----------|---------|---------|--------------|------------|---------|
| gga-miR-29c-3p  | 11632.69 | 9782.55  | 0.25946871   | 9.25E-39  | MAPRE2   | 88.9765 | 40.2294 | 1.145174128  | 0.00016231 | Postive |
| gga-miR-29c-3p  | 11632.69 | 9782.55  | 0.25946871   | 9.25E-39  | FOS      | 13.2273 | 5.88745 | 1.167803796  | 0.00016231 | Postive |
| gga-miR-29c-3p  | 11632.69 | 9782.55  | 0.25946871   | 9.25E-39  | USP31    | 12.5615 | 5.98806 | 1.068848168  | 0.00016231 | Postive |
| gga-miR-29c-3p  | 11632.69 | 9782.55  | 0.25946871   | 9.25E-39  | FOXO3    | 237.178 | 107.708 | 1.138844786  | 0.00016231 | Postive |
| gga-miR-16c-5p  | 11005.37 | 13366.75 | -0.270874638 | 9.68E-48  | MYLK4    | 74.76   | 168.484 | -1.172273119 | 0.00016231 | Postive |
| gga-miR-16c-5p  | 11005.37 | 13366.75 | -0.270874638 | 9.68E-48  | ARHGAP5  | 9.52823 | 20.7222 | -1.120897033 | 0.00016231 | Postive |
| gga-miR-16c-5p  | 11005.37 | 13366.75 | -0.270874638 | 9.68E-48  | FAM133B  | 25.6715 | 55.0215 | -1.099827875 | 0.00016231 | Postive |
| gga-miR-16c-5p  | 11005.37 | 13366.75 | -0.270874638 | 9.68E-48  | LRRFIP2  | 22.1577 | 55.09   | -1.313982327 | 0.00016231 | Postive |
| gga-miR-16c-5p  | 11005.37 | 13366.75 | -0.270874638 | 9.68E-48  | VAPB     | 11.1896 | 23.6654 | -1.080620843 | 0.00016231 | Postive |
| gga-miR-16c-5p  | 11005.37 | 13366.75 | -0.270874638 | 9.68E-48  | CMPK1    | 3.72517 | 8.30612 | -1.15686845  | 0.00016231 | Postive |
| gga-miR-142-3p  | 10428.06 | 7423.23  | 0.499918257  | 4.44E-116 | DIRC2    | 52.0867 | 21.3661 | 1.285591443  | 0.00016231 | Postive |
| gga-miR-142-3p  | 10428.06 | 7423.23  | 0.499918257  | 4.44E-116 | TFG      | 52.9517 | 19.4136 | 1.44760933   | 0.00016231 | Postive |
| gga-miR-196-5p  | 9318.88  | 11221.16 | -0.258426903 | 6.42E-37  | COL1A2   | 124.212 | 262.943 | -1.081945533 | 0.00016231 | Postive |
| gga-miR-1559-5p | 6850.52  | 4924.16  | 0.485902305  | 6.64E-73  | RBM24    | 180.272 | 82.9118 | 1.120525988  | 0.00016231 | Postive |
| gga-miR-130b-3p | 6614.13  | 10662.16 | -0.679309987 | 1.30E-203 | INSIG1   | 30.6869 | 105.105 | -1.776136485 | 0.00016231 | Postive |
| gga-miR-130b-3p | 6614.13  | 10662.16 | -0.679309987 | 1.30E-203 | CMPK1    | 3.72517 | 8.30612 | -1.15686845  | 0.00016231 | Postive |
| gga-miR-130b-3p | 6614.13  | 10662.16 | -0.679309987 | 1.30E-203 | SUV420H1 | 7.31529 | 14.8195 | -1.01850981  | 0.00016231 | Postive |
| gga-miR-130b-3p | 6614.13  | 10662.16 | -0.679309987 | 1.30E-203 | ROCK2    | 50.0104 | 104.56  | -1.064030997 | 0.00016231 | Postive |
| gga-miR-130b-3p | 6614.13  | 10662.16 | -0.679309987 | 1.30E-203 | ATRX     | 6.13736 | 15.9346 | -1.376472689 | 0.00016231 | Postive |
| gga-miR-489-3p  | 6582.31  | 3822.59  | 0.793609947  | 3.09E-166 | USP31    | 12.5615 | 5.98806 | 1.068848168  | 0.00016231 | Postive |
| gga-miR-489-3p  | 6582.31  | 3822.59  | 0.793609947  | 3.09E-166 | RBM24    | 180.272 | 82.9118 | 1.120525988  | 0.00016231 | Postive |
| gga-miR-218-5p  | 6523.22  | 3337.58  | 0.97634831   | 1.72E-233 | USP31    | 12.5615 | 5.98806 | 1.068848168  | 0.00016231 | Postive |
| gga-miR-218-5p  | 6523.22  | 3337.58  | 0.97634831   | 1.72E-233 | SPSB1    | 27.4066 | 9.02063 | 1.603223262  | 0.00016231 | Postive |
| gga-miR-218-5p  | 6523.22  | 3337.58  | 0.97634831   | 1.72E-233 | PURA     | 37.3771 | 8.76602 | 2.092160763  | 0.00016231 | Postive |
| gga-miR-218-5p  | 6523.22  | 3337.58  | 0.97634831   | 1.72E-233 | KLF9     | 92.8131 | 43.0242 | 1.109180081  | 0.00016231 | Postive |
| gga-miR-1416-5p | 6400.48  | 5680.46  | 0.181738783  | 1.39E-11  | SRSF2    | 22.0181 | 6.40417 | 1.78160647   | 0.00016231 | Postive |
| gga-miR-20b-5p  | 6200.47  | 7875.37  | -0.335403686 | 2.62E-42  | TRIP11   | 4.70797 | 11.8021 | -1.325866555 | 0.00016231 | Postive |
| gga-miR-20b-5p  | 6200.47  | 7875.37  | -0.335403686 | 2.62E-42  | FAM129A  | 5.49809 | 12.1854 | -1.148151182 | 0.00016231 | Postive |
| gga-miR-20b-5p  | 6200.47  | 7875.37  | -0.335403686 | 2.62E-42  | VASH2    | 7.33012 | 14.702  | -1.004103705 | 0.00016231 | Postive |
| gga-miR-20b-5p  | 6200.47  | 7875.37  | -0.335403686 | 2.62E-42  | CMPK1    | 3.72517 | 8.30612 | -1.15686845  | 0.00016231 | Postive |
| gga-miR-20b-5p  | 6200.47  | 7875.37  | -0.335403686 | 2.62E-42  | TPPP     | 3.7568  | 10.0241 | -1.415896493 | 0.00016231 | Postive |
| gga-miR-223     | 6027.73  | 3904.8   | 0.635932582  | 1.00E-103 | FOXO3    | 237.178 | 107.708 | 1.138844786  | 0.00016231 | Postive |
| gga-miR-223     | 6027.73  | 3904.8   | 0.635932582  | 1.00E-103 | EIF4E3   | 11.3358 | 5.50082 | 1.043167609  | 0.00016231 | Postive |
| gga-miR-155     | 5204.94  | 1759.22  | 1.574512065  | 0         | CEBPB    | 92.563  | 14.1096 | 2.713758535  | 0.00016231 | Postive |
| gga-miR-155     | 5204.94  | 1759.22  | 1.574512065  | 0         | FOS      | 13.2273 | 5.88745 | 1.167803796  | 0.00016231 | Postive |
| gga-miR-155     | 5204.94  | 1759.22  | 1.574512065  | 0         | RNF123   | 50.115  | 18.2866 | 1.454455621  | 0.00016231 | Postive |
| gga-miR-205a    | 4900.37  | 2137.36  | 1.206627201  | 2.97E-247 | SSBP3    | 24.3683 | 8.9378  | 1.447013941  | 0.00016231 | Postive |
| gga-miR-205a    | 4900.37  | 2137.36  | 1.206627201  | 2.97E-247 | GPX3     | 1352.74 | 588.922 | 1.199736103  | 0.00016231 | Postive |
| gga-miR-204     | 4336.69  | 2762.13  | 0.66037954   | 4.14E-80  | DVL3     | 11.3959 | 4.71477 | 1.273255568  | 0.00016231 | Postive |
| gga-miR-204     | 4336.69  | 2762.13  | 0.66037954   | 4.14E-80  | RBM24    | 180.272 | 82.9118 | 1.120525988  | 0.00016231 | Postive |
| gga-miR-204     | 4336.69  | 2762.13  | 0.66037954   | 4.14E-80  | IRF2BP2  | 162.342 | 45.4908 | 1.835389581  | 0.00016231 | Postive |
| gga-miR-204     | 4336.69  | 2762.13  | 0.66037954   | 4.14E-80  | MAPRE2   | 88.9765 | 40.2294 | 1.145174128  | 0.00016231 | Postive |
| gga-miR-211     | 4336.69  | 2762.13  | 0.66037954   | 4.14E-80  | DVL3     | 11.3959 | 4.71477 | 1.273255568  | 0.00016231 | Postive |
| gga-miR-211     | 4336.69  | 2762.13  | 0.66037954   | 4.14E-80  | RBM24    | 180.272 | 82.9118 | 1.120525988  | 0.00016231 | Postive |
| gga-miR-211     | 4336.69  | 2762.13  | 0.66037954   | 4.14E-80  | IRF2BP2  | 162.342 | 45.4908 | 1.835389581  | 0.00016231 | Postive |
| gga-miR-211     | 4336.69  | 2762.13  | 0.66037954   | 4.14E-80  | MAPRE2   | 88.9765 | 40.2294 | 1.145174128  | 0.00016231 | Postive |
| gga-miR-190a-5p | 4073.03  | 4858.39  | -0.244809421 | 4.22E-15  | ROCK1    | 3.97387 | 12.3142 | -1.631706323 | 0.00016231 | Postive |
| gga-miR-190a-5p | 4073.03  | 4858.39  | -0.244809421 | 4.22E-15  | FBN1     | 26.6076 | 54.9951 | -1.047464696 | 0.00016231 | Postive |
| gga-miR-190a-5p | 4073.03  | 4858.39  | -0.244809421 | 4.22E-15  | VAPB     | 11.1896 | 23.6654 | -1.080620843 | 0.00016231 | Postive |
| gga-miR-190a-5p | 4073.03  | 4858.39  | -0.244809421 | 4.22E-15  | XPO1     | 15.2124 | 35.4973 | -1.222461515 | 0.00016231 | Postive |
| gga-miR-140-5p  | 3682.1   | 4258.29  | -0.200178953 | 1.83E-09  | HNRNP3   | 17.512  | 35.4095 | -1.015792613 | 0.00016231 | Postive |

|                 |             |             |              |           |         |         |         |              |            |          |
|-----------------|-------------|-------------|--------------|-----------|---------|---------|---------|--------------|------------|----------|
| gga-miR-140-5p  | 3682.1      | 4258.29     | -0.200178953 | 1.83E-09  | DCUN1D5 | 14.6026 | 34.1085 | -1.223906046 | 0.00016231 | Postive  |
| gga-miR-499-5p  | 3477.53     | 4200.74     | -0.263014091 | 5.47E-15  | UBE2V2  | 12.8914 | 28.1908 | -1.128815471 | 0.00016231 | Postive  |
| gga-miR-144-3p  | 3209.33     | 1972.95     | 0.711484191  | 8.31E-68  | CBFA2T2 | 21.8448 | 7.18698 | 1.603832321  | 0.00016231 | Postive  |
| gga-miR-144-3p  | 3209.33     | 1972.95     | 0.711484191  | 8.31E-68  | KLF9    | 92.8131 | 43.0242 | 1.109180081  | 0.00016231 | Postive  |
| gga-miR-144-3p  | 3209.33     | 1972.95     | 0.711484191  | 8.31E-68  | FOS     | 13.2273 | 5.88745 | 1.167803796  | 0.00016231 | Postive  |
| gga-miR-144-3p  | 3209.33     | 1972.95     | 0.711484191  | 8.31E-68  | TGIF1   | 11.6257 | 5.20682 | 1.158843147  | 0.00016231 | Postive  |
| gga-miR-144-3p  | 3209.33     | 1972.95     | 0.711484191  | 8.31E-68  | CASKIN2 | 13.1438 | 5.73164 | 1.19736253   | 0.00016231 | Postive  |
| gga-miR-144-3p  | 3209.33     | 1972.95     | 0.711484191  | 8.31E-68  | AHCYL2  | 26.693  | 12.0942 | 1.142146116  | 0.00016231 | Postive  |
| gga-miR-144-3p  | 3209.33     | 1972.95     | 0.711484191  | 8.31E-68  | NCOA1   | 11.8492 | 4.81143 | 1.300252014  | 0.00016231 | Postive  |
| gga-miR-144-3p  | 3209.33     | 1972.95     | 0.711484191  | 8.31E-68  | RXRA    | 58.7086 | 24.9276 | 1.235827865  | 0.00016231 | Postive  |
| gga-miR-458a-3p | 2745.66     | 1660.57     | 0.735040888  | 1.59E-61  | PURA    | 37.3771 | 8.76602 | 2.092160763  | 0.00016231 | Postive  |
| gga-miR-1744-3p | 2359.27     | 1586.58     | 0.581986708  | 1.80E-35  | IRS1    | 129.587 | 37.5296 | 1.787820177  | 0.00016231 | Postive  |
| gga-miR-1744-3p | 2359.27     | 1586.58     | 0.581986708  | 1.80E-35  | BHLHE40 | 36.8113 | 11.4009 | 1.691000983  | 0.00016231 | Postive  |
| gga-miR-1744-3p | 2359.27     | 1586.58     | 0.581986708  | 1.80E-35  | TMCC1   | 25.5803 | 12.7855 | 1.000524603  | 0.00016231 | Postive  |
| gga-miR-153-3p  | 2145.62     | 1644.13     | 0.393636657  | 2.22E-16  | PURA    | 37.3771 | 8.76602 | 2.092160763  | 0.00016231 | Postive  |
| gga-miR-153-3p  | 2145.62     | 1644.13     | 0.393636657  | 2.22E-16  | IRS2    | 14.5185 | 2.42436 | 2.582216557  | 0.00016231 | Postive  |
| gga-miR-153-3p  | 2145.62     | 1644.13     | 0.393636657  | 2.22E-16  | USP31   | 12.5615 | 5.98806 | 1.068848168  | 0.00016231 | Postive  |
| gga-miR-153-3p  | 2145.62     | 1644.13     | 0.393636657  | 2.22E-16  | FOXO3   | 237.178 | 107.708 | 1.138844786  | 0.00016231 | Postive  |
| gga-miR-153-3p  | 2145.62     | 1644.13     | 0.393636657  | 2.22E-16  | SSBP3   | 24.3683 | 8.9378  | 1.447013941  | 0.00016231 | Postive  |
| gga-miR-153-3p  | 2145.62     | 1644.13     | 0.393636657  | 2.22E-16  | MAFA    | 207.582 | 64.3924 | 1.688719022  | 0.00016231 | Postive  |
| gga-miR-9-5p    | 1495.57     | 1035.8      | 0.539516416  | 3.95E-20  | EIF4E3  | 11.3358 | 5.50082 | 1.043167609  | 0.00016231 | Postive  |
| gga-miR-9-5p    | 1495.57     | 1035.8      | 0.539516416  | 3.95E-20  | GOT1    | 140.404 | 68.0002 | 1.045973143  | 0.00016231 | Postive  |
| gga-miR-9-5p    | 1495.57     | 1035.8      | 0.539516416  | 3.95E-20  | RBFOX2  | 175.251 | 77.2247 | 1.18228841   | 0.00016231 | Postive  |
| gga-miR-9-5p    | 1495.57     | 1035.8      | 0.539516416  | 3.95E-20  | PURA    | 37.3771 | 8.76602 | 2.092160763  | 0.00016231 | Postive  |
| gga-miR-9-5p    | 1495.57     | 1035.8      | 0.539516416  | 3.95E-20  | RAB40B  | 11.8084 | 5.28659 | 1.159404149  | 0.00016231 | Postive  |
| gga-miR-9-5p    | 1495.57     | 1035.8      | 0.539516416  | 3.95E-20  | FAM117A | 27.7614 | 12.3725 | 1.165943282  | 0.00016231 | Postive  |
| gga-miR-9-5p    | 1495.57     | 1035.8      | 0.539516416  | 3.95E-20  | AMOTL1  | 58.0717 | 24.3905 | 1.251515935  | 0.00016231 | Postive  |
| gga-miR-9-5p    | 1495.57     | 1035.8      | 0.539516416  | 3.95E-20  | RBM24   | 180.272 | 82.9118 | 1.120525988  | 0.00016231 | Postive  |
| gga-miR-9-5p    | 1495.57     | 1035.8      | 0.539516416  | 3.95E-20  | SRF     | 18.4847 | 6.94797 | 1.411668199  | 0.00016231 | Postive  |
| gga-miR-1729-5p | 1368.28     | 1150.89     | 0.259179981  | 1.59E-05  | RBM24   | 180.272 | 82.9118 | 1.120525988  | 0.00016231 | Postive  |
| gga-miR-1729-5p | 1368.28     | 1150.89     | 0.259179981  | 1.59E-05  | IRF2BP2 | 162.342 | 45.4908 | 1.835389581  | 0.00016231 | Postive  |
| gga-miR-1729-5p | 1368.28     | 1150.89     | 0.259179981  | 1.59E-05  | DVL3    | 11.3959 | 4.71477 | 1.273255568  | 0.00016231 | Postive  |
| gga-miR-1729-5p | 1368.28     | 1150.89     | 0.259179981  | 1.59E-05  | PMEP1   | 10.6419 | 3.70473 | 1.522315444  | 0.00016231 | Postive  |
| gga-miR-183-5p  | 1050.08     | 1257.76     | -0.250790974 | 6.63E-05  | VAPB    | 11.1896 | 23.6654 | -1.080620843 | 0.00016231 | Postive  |
| gga-miR-183-5p  | 1050.08     | 1257.76     | -0.250790974 | 6.63E-05  | SEPT7   | 30.9083 | 67.4513 | -1.125851943 | 0.00016231 | Postive  |
| gga-miR-183-5p  | 1050.08     | 1257.76     | -0.250790974 | 6.63E-05  | INSIG1  | 30.6869 | 105.105 | -1.776136485 | 0.00016231 | Postive  |
| gga-miR-183-5p  | 1050.08     | 1257.76     | -0.250790974 | 6.63E-05  | GNB1    | 8.30324 | 18.3398 | -1.143231602 | 0.00016231 | Postive  |
| gga-miR-133a-3p | 16177058.89 | 16418961.92 | -0.011847135 | 4.63E-144 | SRSF2   | 22.0181 | 6.40417 | 1.78160647   | 0.00016231 | Negative |
| gga-miR-133c-3p | 15232674.15 | 15445951.44 | -0.010493064 | 1.69E-105 | SRSF2   | 22.0181 | 6.40417 | 1.78160647   | 0.00016231 | Negative |
| gga-miR-133b-3p | 15123175    | 15329185.58 | -0.009953553 | 3.00E-94  | SRSF2   | 22.0181 | 6.40417 | 1.78160647   | 0.00016231 | Negative |
| gga-miR-22-3p   | 6060606.31  | 5856904.53  | 0.058890194  | 0         | HNRNPA3 | 6.80745 | 18.0362 | -1.405709027 | 0.00016231 | Negative |
| gga-miR-30a-5p  | 5516178.95  | 6501640.5   | -0.227568083 | 0         | TMCC1   | 25.5803 | 12.7855 | 1.000524603  | 0.00016231 | Negative |
| gga-miR-30a-5p  | 5516178.95  | 6501640.5   | -0.227568083 | 0         | KLF10   | 27.7166 | 13.8179 | 1.004211916  | 0.00016231 | Negative |
| gga-miR-30a-5p  | 5516178.95  | 6501640.5   | -0.227568083 | 0         | PGP     | 81.4477 | 30.824  | 1.401819868  | 0.00016231 | Negative |
| gga-miR-30a-5p  | 5516178.95  | 6501640.5   | -0.227568083 | 0         | FOXO3   | 237.178 | 107.708 | 1.138844786  | 0.00016231 | Negative |
| gga-miR-30a-5p  | 5516178.95  | 6501640.5   | -0.227568083 | 0         | MEX3D   | 12.0299 | 3.54358 | 1.763345125  | 0.00016231 | Negative |
| gga-miR-30a-5p  | 5516178.95  | 6501640.5   | -0.227568083 | 0         | IRS1    | 129.587 | 37.5296 | 1.787820177  | 0.00016231 | Negative |
| gga-miR-30a-5p  | 5516178.95  | 6501640.5   | -0.227568083 | 0         | SSBP3   | 24.3683 | 8.9378  | 1.447013941  | 0.00016231 | Negative |
| gga-miR-30a-5p  | 5516178.95  | 6501640.5   | -0.227568083 | 0         | IRS2    | 14.5185 | 2.42436 | 2.582216557  | 0.00016231 | Negative |
| gga-miR-30a-5p  | 5516178.95  | 6501640.5   | -0.227568083 | 0         | IER5    | 84.9594 | 23.5908 | 1.848549234  | 0.00016231 | Negative |

|                 |            |            |              |          |          |         |         |              |            |          |
|-----------------|------------|------------|--------------|----------|----------|---------|---------|--------------|------------|----------|
| gga-miR-26a-5p  | 5512392.3  | 5684205.49 | -0.034713704 | 0        | RBM24    | 180.272 | 82.9118 | 1.120525988  | 0.00016231 | Negative |
| gga-miR-26a-5p  | 5512392.3  | 5684205.49 | -0.034713704 | 0        | CDK2AP1  | 41.3719 | 18.6736 | 1.14765113   | 0.00016231 | Negative |
| gga-miR-26a-5p  | 5512392.3  | 5684205.49 | -0.034713704 | 0        | PMEPA1   | 10.6419 | 3.70473 | 1.522315444  | 0.00016231 | Negative |
| gga-miR-26a-5p  | 5512392.3  | 5684205.49 | -0.034713704 | 0        | PURA     | 37.3771 | 8.76602 | 2.092160763  | 0.00016231 | Negative |
| gga-miR-26a-5p  | 5512392.3  | 5684205.49 | -0.034713704 | 0        | LINGO1   | 224.286 | 98.5926 | 1.185788297  | 0.00016231 | Negative |
| gga-miR-26a-5p  | 5512392.3  | 5684205.49 | -0.034713704 | 0        | BHLHE40  | 36.8113 | 11.4009 | 1.691000983  | 0.00016231 | Negative |
| gga-miR-26a-5p  | 5512392.3  | 5684205.49 | -0.034713704 | 0        | TMCC1    | 25.5803 | 12.7855 | 1.000524603  | 0.00016231 | Negative |
| gga-miR-30d-5p  | 3872505.2  | 4800290.23 | -0.300288016 | 0        | TMCC1    | 25.5803 | 12.7855 | 1.000524603  | 0.00016231 | Negative |
| gga-miR-30d-5p  | 3872505.2  | 4800290.23 | -0.300288016 | 0        | KLF10    | 27.7166 | 13.8179 | 1.004211916  | 0.00016231 | Negative |
| gga-miR-30d-5p  | 3872505.2  | 4800290.23 | -0.300288016 | 0        | PGP      | 81.4477 | 30.824  | 1.401819868  | 0.00016231 | Negative |
| gga-miR-30d-5p  | 3872505.2  | 4800290.23 | -0.300288016 | 0        | FOXO3    | 237.178 | 107.708 | 1.138844786  | 0.00016231 | Negative |
| gga-miR-30d-5p  | 3872505.2  | 4800290.23 | -0.300288016 | 0        | MEX3D    | 12.0299 | 3.54358 | 1.763345125  | 0.00016231 | Negative |
| gga-miR-30d-5p  | 3872505.2  | 4800290.23 | -0.300288016 | 0        | IRS1     | 129.587 | 37.5296 | 1.787820177  | 0.00016231 | Negative |
| gga-miR-30d-5p  | 3872505.2  | 4800290.23 | -0.300288016 | 0        | SSBP3    | 24.3683 | 8.9378  | 1.447013941  | 0.00016231 | Negative |
| gga-miR-30d-5p  | 3872505.2  | 4800290.23 | -0.300288016 | 0        | IRS2     | 14.5185 | 2.42436 | 2.582216557  | 0.00016231 | Negative |
| gga-miR-30d-5p  | 3872505.2  | 4800290.23 | -0.300288016 | 0        | IER5     | 84.9594 | 23.5908 | 1.848549234  | 0.00016231 | Negative |
| gga-miR-30e-5p  | 3635178.24 | 4124439.17 | -0.172605412 | 0        | TMCC1    | 25.5803 | 12.7855 | 1.000524603  | 0.00016231 | Negative |
| gga-miR-30e-5p  | 3635178.24 | 4124439.17 | -0.172605412 | 0        | KLF10    | 27.7166 | 13.8179 | 1.004211916  | 0.00016231 | Negative |
| gga-miR-30e-5p  | 3635178.24 | 4124439.17 | -0.172605412 | 0        | PGP      | 81.4477 | 30.824  | 1.401819868  | 0.00016231 | Negative |
| gga-miR-30e-5p  | 3635178.24 | 4124439.17 | -0.172605412 | 0        | FOXO3    | 237.178 | 107.708 | 1.138844786  | 0.00016231 | Negative |
| gga-miR-30e-5p  | 3635178.24 | 4124439.17 | -0.172605412 | 0        | MEX3D    | 12.0299 | 3.54358 | 1.763345125  | 0.00016231 | Negative |
| gga-miR-30e-5p  | 3635178.24 | 4124439.17 | -0.172605412 | 0        | IRS1     | 129.587 | 37.5296 | 1.787820177  | 0.00016231 | Negative |
| gga-miR-30e-5p  | 3635178.24 | 4124439.17 | -0.172605412 | 0        | SSBP3    | 24.3683 | 8.9378  | 1.447013941  | 0.00016231 | Negative |
| gga-miR-30e-5p  | 3635178.24 | 4124439.17 | -0.172605412 | 0        | IRS2     | 14.5185 | 2.42436 | 2.582216557  | 0.00016231 | Negative |
| gga-miR-30e-5p  | 3635178.24 | 4124439.17 | -0.172605412 | 0        | IER5     | 84.9594 | 23.5908 | 1.848549234  | 0.00016231 | Negative |
| gga-miR-181a-5p | 2087579.9  | 1996273.67 | 0.074088345  | 0        | RAP1B    | 4.66868 | 10.6201 | -1.185710739 | 0.00016231 | Negative |
| gga-miR-181a-5p | 2087579.9  | 1996273.67 | 0.074088345  | 0        | ROCK2    | 50.0104 | 104.56  | -1.064030997 | 0.00016231 | Negative |
| gga-miR-181a-5p | 2087579.9  | 1996273.67 | 0.074088345  | 0        | FAM13B   | 8.2073  | 23.1809 | -1.497956986 | 0.00016231 | Negative |
| gga-miR-181a-5p | 2087579.9  | 1996273.67 | 0.074088345  | 0        | HSP90B1  | 12.235  | 48.3257 | -1.981776529 | 0.00016231 | Negative |
| gga-miR-181a-5p | 2087579.9  | 1996273.67 | 0.074088345  | 0        | AFAP1    | 5.24484 | 10.6248 | -1.018465017 | 0.00016231 | Negative |
| gga-miR-181a-5p | 2087579.9  | 1996273.67 | 0.074088345  | 0        | HSPA5    | 13.7934 | 35.2541 | -1.353812933 | 0.00016231 | Negative |
| gga-miR-181a-5p | 2087579.9  | 1996273.67 | 0.074088345  | 0        | SLC25A25 | 4.46225 | 10.4111 | -1.222279258 | 0.00016231 | Negative |
| gga-let-7j-5p   | 1933522.85 | 1763522.91 | 0.142337939  | 0        | COL1A2   | 124.212 | 262.943 | -1.081945533 | 0.00016231 | Negative |
| gga-let-7j-5p   | 1933522.85 | 1763522.91 | 0.142337939  | 0        | COL5A2   | 22.4483 | 47.8186 | -1.090965698 | 0.00016231 | Negative |
| gga-let-7j-5p   | 1933522.85 | 1763522.91 | 0.142337939  | 0        | VASH2    | 7.33012 | 14.702  | -1.004103705 | 0.00016231 | Negative |
| gga-let-7f-5p   | 1810554.5  | 1701629.77 | 0.099080869  | 0        | COL1A2   | 124.212 | 262.943 | -1.081945533 | 0.00016231 | Negative |
| gga-let-7f-5p   | 1810554.5  | 1701629.77 | 0.099080869  | 0        | COL5A2   | 22.4483 | 47.8186 | -1.090965698 | 0.00016231 | Negative |
| gga-let-7f-5p   | 1810554.5  | 1701629.77 | 0.099080869  | 0        | VASH2    | 7.33012 | 14.702  | -1.004103705 | 0.00016231 | Negative |
| gga-miR-148a-3p | 1311848.77 | 1183894.35 | 0.157627517  | 0        | FBN1     | 26.6076 | 54.9951 | -1.047464696 | 0.00016231 | Negative |
| gga-miR-148a-3p | 1311848.77 | 1183894.35 | 0.157627517  | 0        | ROCK1    | 3.97387 | 12.3142 | -1.631706323 | 0.00016231 | Negative |
| gga-let-7c-5p   | 1103087.6  | 913460.21  | 0.281700016  | 0        | COL1A2   | 124.212 | 262.943 | -1.081945533 | 0.00016231 | Negative |
| gga-let-7c-5p   | 1103087.6  | 913460.21  | 0.281700016  | 0        | COL5A2   | 22.4483 | 47.8186 | -1.090965698 | 0.00016231 | Negative |
| gga-let-7c-5p   | 1103087.6  | 913460.21  | 0.281700016  | 0        | VASH2    | 7.33012 | 14.702  | -1.004103705 | 0.00016231 | Negative |
| gga-miR-92-3p   | 543713.66  | 539248.81  | 0.021462429  | 2.80E-14 | GOLGA4   | 5.28505 | 13.4586 | -1.348539319 | 0.00016231 | Negative |
| gga-miR-92-3p   | 543713.66  | 539248.81  | 0.021462429  | 2.80E-14 | RAP1B    | 4.66868 | 10.6201 | -1.185710739 | 0.00016231 | Negative |
| gga-miR-92-3p   | 543713.66  | 539248.81  | 0.021462429  | 2.80E-14 | ACTC1    | 34.0831 | 88.9522 | -1.383973727 | 0.00016231 | Negative |
| gga-miR-92-3p   | 543713.66  | 539248.81  | 0.021462429  | 2.80E-14 | ATRX     | 6.13736 | 15.9346 | -1.376472689 | 0.00016231 | Negative |
| gga-miR-92-3p   | 543713.66  | 539248.81  | 0.021462429  | 2.80E-14 | COL1A2   | 124.212 | 262.943 | -1.081945533 | 0.00016231 | Negative |
| gga-miR-92-3p   | 543713.66  | 539248.81  | 0.021462429  | 2.80E-14 | FAM133B  | 25.6715 | 55.0215 | -1.099827875 | 0.00016231 | Negative |
| gga-miR-92-3p   | 543713.66  | 539248.81  | 0.021462429  | 2.80E-14 | SUV420H1 | 7.31529 | 14.8195 | -1.01850981  | 0.00016231 | Negative |
| gga-miR-92-3p   | 543713.66  | 539248.81  | 0.021462429  | 2.80E-14 | LRRFP2   | 22.1577 | 55.09   | -1.313982327 | 0.00016231 | Negative |



|                 |           |           |              |          |          |         |         |              |            |          |
|-----------------|-----------|-----------|--------------|----------|----------|---------|---------|--------------|------------|----------|
| gga-miR-92-3p   | 543713.66 | 539248.81 | 0.021462429  | 2.80E-14 | TPPP     | 3.7568  | 10.0241 | -1.415896493 | 0.00016231 | Negative |
| gga-miR-92-3p   | 543713.66 | 539248.81 | 0.021462429  | 2.80E-14 | SERPINF1 | 66.3539 | 140.206 | -1.079294921 | 0.00016231 | Negative |
| gga-miR-92-3p   | 543713.66 | 539248.81 | 0.021462429  | 2.80E-14 | INSIG1   | 30.6869 | 105.105 | -1.776136485 | 0.00016231 | Negative |
| gga-miR-27b-3p  | 494682.7  | 459171.63 | 0.117036382  | 0        | FAM133B  | 25.6715 | 55.0215 | -1.099827875 | 0.00016231 | Negative |
| gga-miR-27b-3p  | 494682.7  | 459171.63 | 0.117036382  | 0        | CKAP4    | 6.53584 | 17.7989 | -1.445343512 | 0.00016231 | Negative |
| gga-miR-27b-3p  | 494682.7  | 459171.63 | 0.117036382  | 0        | SLC25A25 | 4.46225 | 10.4111 | -1.222279258 | 0.00016231 | Negative |
| gga-miR-27b-3p  | 494682.7  | 459171.63 | 0.117036382  | 0        | RAP1B    | 4.66868 | 10.6201 | -1.185710739 | 0.00016231 | Negative |
| gga-miR-27b-3p  | 494682.7  | 459171.63 | 0.117036382  | 0        | KDEL2    | 6.62525 | 13.3644 | -1.012348269 | 0.00016231 | Negative |
| gga-miR-27b-3p  | 494682.7  | 459171.63 | 0.117036382  | 0        | ATRX     | 6.13736 | 15.9346 | -1.376472689 | 0.00016231 | Negative |
| gga-miR-27b-3p  | 494682.7  | 459171.63 | 0.117036382  | 0        | XPO1     | 15.2124 | 35.4973 | -1.222461515 | 0.00016231 | Negative |
| gga-miR-27b-3p  | 494682.7  | 459171.63 | 0.117036382  | 0        | ATF3     | 21.6204 | 101.446 | -2.230246861 | 0.00016231 | Negative |
| gga-miR-27b-3p  | 494682.7  | 459171.63 | 0.117036382  | 0        | SUV420H1 | 7.31529 | 14.8195 | -1.01850981  | 0.00016231 | Negative |
| gga-miR-101-3p  | 474140.24 | 401158.63 | 0.250707448  | 0        | GOLGA4   | 5.28505 | 13.4586 | -1.348539319 | 0.00016231 | Negative |
| gga-miR-101-3p  | 474140.24 | 401158.63 | 0.250707448  | 0        | AFAP1    | 5.24484 | 10.6248 | -1.018465017 | 0.00016231 | Negative |
| gga-miR-101-3p  | 474140.24 | 401158.63 | 0.250707448  | 0        | ROCK2    | 50.0104 | 104.56  | -1.064030997 | 0.00016231 | Negative |
| gga-miR-101-3p  | 474140.24 | 401158.63 | 0.250707448  | 0        | FBN1     | 26.6076 | 54.9951 | -1.047464696 | 0.00016231 | Negative |
| gga-miR-101-3p  | 474140.24 | 401158.63 | 0.250707448  | 0        | HSPA8    | 75.6842 | 422.686 | -2.481522272 | 0.00016231 | Negative |
| gga-miR-101-3p  | 474140.24 | 401158.63 | 0.250707448  | 0        | SEL1L    | 5.81898 | 13.1144 | -1.172313611 | 0.00016231 | Negative |
| gga-miR-101-3p  | 474140.24 | 401158.63 | 0.250707448  | 0        | RAP1B    | 4.66868 | 10.6201 | -1.185710739 | 0.00016231 | Negative |
| gga-miR-101-3p  | 474140.24 | 401158.63 | 0.250707448  | 0        | APP      | 9.48344 | 19.6984 | -1.054596073 | 0.00016231 | Negative |
| gga-miR-101-3p  | 474140.24 | 401158.63 | 0.250707448  | 0        | HNRNPA3  | 6.80745 | 18.0362 | -1.405709027 | 0.00016231 | Negative |
| gga-miR-30c-5p  | 450797.58 | 568867.75 | -0.326047081 | 0        | TMCC1    | 25.5803 | 12.7855 | 1.000524603  | 0.00016231 | Negative |
| gga-miR-30c-5p  | 450797.58 | 568867.75 | -0.326047081 | 0        | KLF10    | 27.7166 | 13.8179 | 1.004211916  | 0.00016231 | Negative |
| gga-miR-30c-5p  | 450797.58 | 568867.75 | -0.326047081 | 0        | PGP      | 81.4477 | 30.824  | 1.401819868  | 0.00016231 | Negative |
| gga-miR-30c-5p  | 450797.58 | 568867.75 | -0.326047081 | 0        | FOXO3    | 237.178 | 107.708 | 1.138844786  | 0.00016231 | Negative |
| gga-miR-30c-5p  | 450797.58 | 568867.75 | -0.326047081 | 0        | MEX3D    | 12.0299 | 3.54358 | 1.763345125  | 0.00016231 | Negative |
| gga-miR-30c-5p  | 450797.58 | 568867.75 | -0.326047081 | 0        | IRS1     | 129.587 | 37.5296 | 1.787820177  | 0.00016231 | Negative |
| gga-miR-30c-5p  | 450797.58 | 568867.75 | -0.326047081 | 0        | SSBP3    | 24.3683 | 8.9378  | 1.447013941  | 0.00016231 | Negative |
| gga-miR-30c-5p  | 450797.58 | 568867.75 | -0.326047081 | 0        | IRS2     | 14.5185 | 2.42436 | 2.582216557  | 0.00016231 | Negative |
| gga-miR-30c-5p  | 450797.58 | 568867.75 | -0.326047081 | 0        | IER5     | 84.9594 | 23.5908 | 1.848549234  | 0.00016231 | Negative |
| gga-miR-125b-5p | 404462.27 | 285609.43 | 0.511527957  | 0        | SEL1L    | 5.81898 | 13.1144 | -1.172313611 | 0.00016231 | Negative |
| gga-let-7b-5p   | 372600.78 | 329030.81 | 0.188974455  | 0        | COL1A2   | 124.212 | 262.943 | -1.081945533 | 0.00016231 | Negative |
| gga-let-7b-5p   | 372600.78 | 329030.81 | 0.188974455  | 0        | COL5A2   | 22.4483 | 47.8186 | -1.090965698 | 0.00016231 | Negative |
| gga-let-7b-5p   | 372600.78 | 329030.81 | 0.188974455  | 0        | VASH2    | 7.33012 | 14.702  | -1.004103705 | 0.00016231 | Negative |
| gga-miR-1a-3p   | 362868.23 | 438537.85 | -0.263689173 | 0        | TMCC1    | 25.5803 | 12.7855 | 1.000524603  | 0.00016231 | Negative |
| gga-miR-1a-3p   | 362868.23 | 438537.85 | -0.263689173 | 0        | EIF4E3   | 11.3358 | 5.50082 | 1.043167609  | 0.00016231 | Negative |
| gga-miR-1b-3p   | 311723.47 | 376965.31 | -0.264598543 | 0        | TMCC1    | 25.5803 | 12.7855 | 1.000524603  | 0.00016231 | Negative |
| gga-miR-1b-3p   | 311723.47 | 376965.31 | -0.264598543 | 0        | EIF4E3   | 11.3358 | 5.50082 | 1.043167609  | 0.00016231 | Negative |
| gga-let-7i      | 271147.69 | 318697.47 | -0.223542244 | 0        | ABCC5    | 18.0863 | 8.62963 | 1.06752669   | 0.00016231 | Negative |
| gga-let-7i      | 271147.69 | 318697.47 | -0.223542244 | 0        | IRS2     | 14.5185 | 2.42436 | 2.582216557  | 0.00016231 | Negative |
| gga-let-7i      | 271147.69 | 318697.47 | -0.223542244 | 0        | FBXO32   | 103.023 | 40.3665 | 1.351736049  | 0.00016231 | Negative |
| gga-let-7i      | 271147.69 | 318697.47 | -0.223542244 | 0        | RBFOX2   | 175.251 | 77.2247 | 1.18228841   | 0.00016231 | Negative |
| gga-let-7i      | 271147.69 | 318697.47 | -0.223542244 | 0        | KLF9     | 92.8131 | 43.0242 | 1.109180081  | 0.00016231 | Negative |
| gga-let-7i      | 271147.69 | 318697.47 | -0.223542244 | 0        | TRIB1    | 19.8524 | 9.6717  | 1.037472028  | 0.00016231 | Negative |
| gga-let-7i      | 271147.69 | 318697.47 | -0.223542244 | 0        | SCYL3    | 44.2791 | 19.9482 | 1.150367326  | 0.00016231 | Negative |
| gga-miR-126-3p  | 186591.32 | 227736.18 | -0.27791519  | 0        | IRS1     | 129.587 | 37.5296 | 1.787820177  | 0.00016231 | Negative |
| gga-miR-30a-3p  | 161784.91 | 204077.2  | -0.325471516 | 0        | CDKN1B   | 67.5216 | 26.4149 | 1.353997142  | 0.00016231 | Negative |
| gga-let-7g-5p   | 161712.18 | 156890.77 | 0.053234308  | 7.39E-25 | COL1A2   | 124.212 | 262.943 | -1.081945533 | 0.00016231 | Negative |
| gga-let-7g-5p   | 161712.18 | 156890.77 | 0.053234308  | 7.39E-25 | COL5A2   | 22.4483 | 47.8186 | -1.090965698 | 0.00016231 | Negative |
| gga-let-7g-5p   | 161712.18 | 156890.77 | 0.053234308  | 7.39E-25 | VASH2    | 7.33012 | 14.702  | -1.004103705 | 0.00016231 | Negative |
| gga-miR-199-5p  | 157089.1  | 112030.78 | 0.497254361  | 0        | HSPA5    | 13.7934 | 35.2541 | -1.353812933 | 0.00016231 | Negative |

|                 |           |           |              |           |         |         |         |              |            |          |
|-----------------|-----------|-----------|--------------|-----------|---------|---------|---------|--------------|------------|----------|
| gga-miR-199-5p  | 157089.1  | 112030.78 | 0.497254361  | 0         | ROCK1   | 3.97387 | 12.3142 | -1.631706323 | 0.00016231 | Negative |
| gga-miR-142-5p  | 108462.71 | 54058.88  | 1.014162038  | 0         | ARHGAP5 | 9.52823 | 20.7222 | -1.120897033 | 0.00016231 | Negative |
| gga-miR-142-5p  | 108462.71 | 54058.88  | 1.014162038  | 0         | ROCK1   | 3.97387 | 12.3142 | -1.631706323 | 0.00016231 | Negative |
| gga-miR-181b-5p | 104412.41 | 123095.75 | -0.227921315 | 0         | BHLHE40 | 36.8113 | 11.4009 | 1.691000983  | 0.00016231 | Negative |
| gga-miR-181b-5p | 104412.41 | 123095.75 | -0.227921315 | 0         | GOT2    | 227.843 | 71.4575 | 1.672882701  | 0.00016231 | Negative |
| gga-miR-181b-5p | 104412.41 | 123095.75 | -0.227921315 | 0         | IRS2    | 14.5185 | 2.42436 | 2.582216557  | 0.00016231 | Negative |
| gga-miR-181b-5p | 104412.41 | 123095.75 | -0.227921315 | 0         | TMCC1   | 25.5803 | 12.7855 | 1.000524603  | 0.00016231 | Negative |
| gga-miR-181b-5p | 104412.41 | 123095.75 | -0.227921315 | 0         | FOS     | 13.2273 | 5.88745 | 1.167803796  | 0.00016231 | Negative |
| gga-miR-181b-5p | 104412.41 | 123095.75 | -0.227921315 | 0         | ADM     | 16.7993 | 4.13757 | 2.021545494  | 0.00016231 | Negative |
| gga-miR-181b-5p | 104412.41 | 123095.75 | -0.227921315 | 0         | ADCY9   | 96.6021 | 45.5592 | 1.084312137  | 0.00016231 | Negative |
| gga-miR-128-3p  | 99089.28  | 110172.91 | -0.143402193 | 1.43E-113 | IRS1    | 129.587 | 37.5296 | 1.787820177  | 0.00016231 | Negative |
| gga-miR-128-3p  | 99089.28  | 110172.91 | -0.143402193 | 1.43E-113 | FAM78A  | 25.2244 | 10.4459 | 1.271883155  | 0.00016231 | Negative |
| gga-miR-128-3p  | 99089.28  | 110172.91 | -0.143402193 | 1.43E-113 | ZBTB42  | 15.7169 | 6.99129 | 1.168686104  | 0.00016231 | Negative |
| gga-miR-128-3p  | 99089.28  | 110172.91 | -0.143402193 | 1.43E-113 | FOXO3   | 237.178 | 107.708 | 1.138844786  | 0.00016231 | Negative |
| gga-miR-128-3p  | 99089.28  | 110172.91 | -0.143402193 | 1.43E-113 | MN1     | 51.1796 | 23.2701 | 1.137091461  | 0.00016231 | Negative |
| gga-miR-128-3p  | 99089.28  | 110172.91 | -0.143402193 | 1.43E-113 | SEMA7A  | 23.4429 | 10.57   | 1.149175672  | 0.00016231 | Negative |
| gga-miR-128-3p  | 99089.28  | 110172.91 | -0.143402193 | 1.43E-113 | TMCC1   | 25.5803 | 12.7855 | 1.000524603  | 0.00016231 | Negative |
| gga-miR-130a-3p | 95161.71  | 100513.67 | -0.069372179 | 7.62E-26  | PMEP1   | 10.6419 | 3.70473 | 1.522315444  | 0.00016231 | Negative |
| gga-miR-130a-3p | 95161.71  | 100513.67 | -0.069372179 | 7.62E-26  | FBXO48  | 11.4122 | 5.15348 | 1.146958058  | 0.00016231 | Negative |
| gga-miR-130a-3p | 95161.71  | 100513.67 | -0.069372179 | 7.62E-26  | TRIB1   | 19.8524 | 9.6717  | 1.037472028  | 0.00016231 | Negative |
| gga-miR-130a-3p | 95161.71  | 100513.67 | -0.069372179 | 7.62E-26  | MEX3D   | 12.0299 | 3.54358 | 1.763345125  | 0.00016231 | Negative |
| gga-miR-130a-3p | 95161.71  | 100513.67 | -0.069372179 | 7.62E-26  | SRSF2   | 22.0181 | 6.40417 | 1.78160647   | 0.00016231 | Negative |
| gga-miR-130a-3p | 95161.71  | 100513.67 | -0.069372179 | 7.62E-26  | BHLHE40 | 36.8113 | 11.4009 | 1.691000983  | 0.00016231 | Negative |
| gga-miR-130a-3p | 95161.71  | 100513.67 | -0.069372179 | 7.62E-26  | EIF4E3  | 11.3358 | 5.50082 | 1.043167609  | 0.00016231 | Negative |
| gga-miR-130a-3p | 95161.71  | 100513.67 | -0.069372179 | 7.62E-26  | RBFOX2  | 175.251 | 77.2247 | 1.18228841   | 0.00016231 | Negative |
| gga-miR-130c-3p | 95061.7   | 101023.35 | -0.078186239 | 1.45E-32  | PMEP1   | 10.6419 | 3.70473 | 1.522315444  | 0.00016231 | Negative |
| gga-miR-130c-3p | 95061.7   | 101023.35 | -0.078186239 | 1.45E-32  | FBXO48  | 11.4122 | 5.15348 | 1.146958058  | 0.00016231 | Negative |
| gga-miR-130c-3p | 95061.7   | 101023.35 | -0.078186239 | 1.45E-32  | TRIB1   | 19.8524 | 9.6717  | 1.037472028  | 0.00016231 | Negative |
| gga-miR-130c-3p | 95061.7   | 101023.35 | -0.078186239 | 1.45E-32  | MEX3D   | 12.0299 | 3.54358 | 1.763345125  | 0.00016231 | Negative |
| gga-miR-130c-3p | 95061.7   | 101023.35 | -0.078186239 | 1.45E-32  | SRSF2   | 22.0181 | 6.40417 | 1.78160647   | 0.00016231 | Negative |
| gga-miR-130c-3p | 95061.7   | 101023.35 | -0.078186239 | 1.45E-32  | BHLHE40 | 36.8113 | 11.4009 | 1.691000983  | 0.00016231 | Negative |
| gga-miR-130c-3p | 95061.7   | 101023.35 | -0.078186239 | 1.45E-32  | EIF4E3  | 11.3358 | 5.50082 | 1.043167609  | 0.00016231 | Negative |
| gga-miR-130c-3p | 95061.7   | 101023.35 | -0.078186239 | 1.45E-32  | RBFOX2  | 175.251 | 77.2247 | 1.18228841   | 0.00016231 | Negative |
| gga-miR-23b-3p  | 83219.9   | 103843.03 | -0.309837482 | 0         | PNRC1   | 249.671 | 99.7301 | 1.323927356  | 0.00016231 | Negative |
| gga-miR-23b-3p  | 83219.9   | 103843.03 | -0.309837482 | 0         | TRIB1   | 19.8524 | 9.6717  | 1.037472028  | 0.00016231 | Negative |
| gga-miR-23b-3p  | 83219.9   | 103843.03 | -0.309837482 | 0         | EIF4E3  | 11.3358 | 5.50082 | 1.043167609  | 0.00016231 | Negative |
| gga-miR-23b-3p  | 83219.9   | 103843.03 | -0.309837482 | 0         | IRS2    | 14.5185 | 2.42436 | 2.582216557  | 0.00016231 | Negative |
| gga-miR-23b-3p  | 83219.9   | 103843.03 | -0.309837482 | 0         | TGIF1   | 11.6257 | 5.20682 | 1.158843147  | 0.00016231 | Negative |
| gga-miR-23b-3p  | 83219.9   | 103843.03 | -0.309837482 | 0         | PURA    | 37.3771 | 8.76602 | 2.092160763  | 0.00016231 | Negative |
| gga-miR-23b-3p  | 83219.9   | 103843.03 | -0.309837482 | 0         | NCOA1   | 11.8492 | 4.81143 | 1.300252014  | 0.00016231 | Negative |
| gga-miR-15c-5p  | 78633.19  | 83587.39  | -0.078580488 | 2.09E-27  | IRS2    | 14.5185 | 2.42436 | 2.582216557  | 0.00016231 | Negative |
| gga-miR-15c-5p  | 78633.19  | 83587.39  | -0.078580488 | 2.09E-27  | SESN1   | 622.095 | 228.65  | 1.443993992  | 0.00016231 | Negative |
| gga-miR-15c-5p  | 78633.19  | 83587.39  | -0.078580488 | 2.09E-27  | PURA    | 37.3771 | 8.76602 | 2.092160763  | 0.00016231 | Negative |
| gga-miR-15c-5p  | 78633.19  | 83587.39  | -0.078580488 | 2.09E-27  | RAB40B  | 11.8084 | 5.28659 | 1.159404149  | 0.00016231 | Negative |
| gga-miR-15c-5p  | 78633.19  | 83587.39  | -0.078580488 | 2.09E-27  | IRS1    | 129.587 | 37.5296 | 1.787820177  | 0.00016231 | Negative |
| gga-miR-15c-5p  | 78633.19  | 83587.39  | -0.078580488 | 2.09E-27  | RBM24   | 180.272 | 82.9118 | 1.120525988  | 0.00016231 | Negative |
| gga-miR-15c-5p  | 78633.19  | 83587.39  | -0.078580488 | 2.09E-27  | SYDE2   | 13.1015 | 6.3583  | 1.043019003  | 0.00016231 | Negative |
| gga-miR-15c-5p  | 78633.19  | 83587.39  | -0.078580488 | 2.09E-27  | TMCC1   | 25.5803 | 12.7855 | 1.000524603  | 0.00016231 | Negative |
| gga-miR-15c-5p  | 78633.19  | 83587.39  | -0.078580488 | 2.09E-27  | MAFA    | 207.582 | 64.3924 | 1.688719022  | 0.00016231 | Negative |
| gga-miR-2964    | 75060.2   | 62386.38  | 0.276383478  | 2.63E-274 | DCUN1D5 | 14.6026 | 34.1085 | -1.223906046 | 0.00016231 | Negative |
| gga-miR-2964    | 75060.2   | 62386.38  | 0.276383478  | 2.63E-274 | HNRNPM  | 8.13862 | 16.9291 | -1.056649183 | 0.00016231 | Negative |

|                |          |          |              |           |         |         |         |              |            |          |
|----------------|----------|----------|--------------|-----------|---------|---------|---------|--------------|------------|----------|
| gga-miR-2964   | 75060.2  | 62386.38 | 0.276383478  | 2.63E-274 | APP     | 9.48344 | 19.6984 | -1.054596073 | 0.00016231 | Negative |
| gga-miR-2964   | 75060.2  | 62386.38 | 0.276383478  | 2.63E-274 | HNRNPA3 | 6.80745 | 18.0362 | -1.405709027 | 0.00016231 | Negative |
| gga-miR-2964   | 75060.2  | 62386.38 | 0.276383478  | 2.63E-274 | ARHGAP5 | 9.52823 | 20.7222 | -1.120897033 | 0.00016231 | Negative |
| gga-miR-30b-5p | 70087.1  | 84269.7  | -0.256298615 | 5.43E-265 | TMCC1   | 25.5803 | 12.7855 | 1.000524603  | 0.00016231 | Negative |
| gga-miR-30b-5p | 70087.1  | 84269.7  | -0.256298615 | 5.43E-265 | KLF10   | 27.7166 | 13.8179 | 1.004211916  | 0.00016231 | Negative |
| gga-miR-30b-5p | 70087.1  | 84269.7  | -0.256298615 | 5.43E-265 | PGP     | 81.4477 | 30.824  | 1.401819868  | 0.00016231 | Negative |
| gga-miR-30b-5p | 70087.1  | 84269.7  | -0.256298615 | 5.43E-265 | FOXO3   | 237.178 | 107.708 | 1.138844786  | 0.00016231 | Negative |
| gga-miR-30b-5p | 70087.1  | 84269.7  | -0.256298615 | 5.43E-265 | MEX3D   | 12.0299 | 3.54358 | 1.763345125  | 0.00016231 | Negative |
| gga-miR-30b-5p | 70087.1  | 84269.7  | -0.256298615 | 5.43E-265 | IRS1    | 129.587 | 37.5296 | 1.787820177  | 0.00016231 | Negative |
| gga-miR-30b-5p | 70087.1  | 84269.7  | -0.256298615 | 5.43E-265 | SSBP3   | 24.3683 | 8.9378  | 1.447013941  | 0.00016231 | Negative |
| gga-miR-30b-5p | 70087.1  | 84269.7  | -0.256298615 | 5.43E-265 | IRS2    | 14.5185 | 2.42436 | 2.582216557  | 0.00016231 | Negative |
| gga-miR-30b-5p | 70087.1  | 84269.7  | -0.256298615 | 5.43E-265 | IER5    | 84.9594 | 23.5908 | 1.848549234  | 0.00016231 | Negative |
| gga-miR-15a    | 66127.71 | 71018.04 | -0.09336416  | 1.80E-32  | IRS2    | 14.5185 | 2.42436 | 2.582216557  | 0.00016231 | Negative |
| gga-miR-15a    | 66127.71 | 71018.04 | -0.09336416  | 1.80E-32  | SESN1   | 622.095 | 228.65  | 1.443993992  | 0.00016231 | Negative |
| gga-miR-15a    | 66127.71 | 71018.04 | -0.09336416  | 1.80E-32  | PURA    | 37.3771 | 8.76602 | 2.092160763  | 0.00016231 | Negative |
| gga-miR-15a    | 66127.71 | 71018.04 | -0.09336416  | 1.80E-32  | RAB40B  | 11.8084 | 5.28659 | 1.159404149  | 0.00016231 | Negative |
| gga-miR-15a    | 66127.71 | 71018.04 | -0.09336416  | 1.80E-32  | IRS1    | 129.587 | 37.5296 | 1.787820177  | 0.00016231 | Negative |
| gga-miR-15a    | 66127.71 | 71018.04 | -0.09336416  | 1.80E-32  | RBM24   | 180.272 | 82.9118 | 1.120525988  | 0.00016231 | Negative |
| gga-miR-15a    | 66127.71 | 71018.04 | -0.09336416  | 1.80E-32  | SYDE2   | 13.1015 | 6.3583  | 1.043019003  | 0.00016231 | Negative |
| gga-miR-15a    | 66127.71 | 71018.04 | -0.09336416  | 1.80E-32  | TMCC1   | 25.5803 | 12.7855 | 1.000524603  | 0.00016231 | Negative |
| gga-miR-15a    | 66127.71 | 71018.04 | -0.09336416  | 1.80E-32  | MAFA    | 207.582 | 64.3924 | 1.688719022  | 0.00016231 | Negative |
| gga-miR-19b-3p | 61345.53 | 77980.92 | -0.336596508 | 0         | PMEP1   | 10.6419 | 3.70473 | 1.522315444  | 0.00016231 | Negative |
| gga-miR-19b-3p | 61345.53 | 77980.92 | -0.336596508 | 0         | KLF10   | 27.7166 | 13.8179 | 1.004211916  | 0.00016231 | Negative |
| gga-miR-19b-3p | 61345.53 | 77980.92 | -0.336596508 | 0         | PNRC1   | 249.671 | 99.7301 | 1.323927356  | 0.00016231 | Negative |
| gga-miR-19b-3p | 61345.53 | 77980.92 | -0.336596508 | 0         | SPSB1   | 27.4066 | 9.02063 | 1.603223262  | 0.00016231 | Negative |
| gga-miR-19b-3p | 61345.53 | 77980.92 | -0.336596508 | 0         | OTUD1   | 54.4932 | 25.3752 | 1.102657019  | 0.00016231 | Negative |
| gga-miR-19b-3p | 61345.53 | 77980.92 | -0.336596508 | 0         | FBXO32  | 103.023 | 40.3665 | 1.351736049  | 0.00016231 | Negative |
| gga-miR-19b-3p | 61345.53 | 77980.92 | -0.336596508 | 0         | TGIF1   | 11.6257 | 5.20682 | 1.158843147  | 0.00016231 | Negative |
| gga-miR-19b-3p | 61345.53 | 77980.92 | -0.336596508 | 0         | CCNL1   | 30.6763 | 13.2045 | 1.21609481   | 0.00016231 | Negative |
| gga-miR-19b-3p | 61345.53 | 77980.92 | -0.336596508 | 0         | DIRC2   | 52.0867 | 21.3661 | 1.285591443  | 0.00016231 | Negative |
| gga-miR-19b-3p | 61345.53 | 77980.92 | -0.336596508 | 0         | MN1     | 51.1796 | 23.2701 | 1.137091461  | 0.00016231 | Negative |
| gga-miR-19b-3p | 61345.53 | 77980.92 | -0.336596508 | 0         | USP31   | 12.5615 | 5.98806 | 1.068848168  | 0.00016231 | Negative |
| gga-miR-19b-3p | 61345.53 | 77980.92 | -0.336596508 | 0         | RBFOX2  | 175.251 | 77.2247 | 1.18228841   | 0.00016231 | Negative |
| gga-miR-19a-3p | 59718.13 | 75391.42 | -0.326664913 | 0         | PMEP1   | 10.6419 | 3.70473 | 1.522315444  | 0.00016231 | Negative |
| gga-miR-19a-3p | 59718.13 | 75391.42 | -0.326664913 | 0         | KLF10   | 27.7166 | 13.8179 | 1.004211916  | 0.00016231 | Negative |
| gga-miR-19a-3p | 59718.13 | 75391.42 | -0.326664913 | 0         | PNRC1   | 249.671 | 99.7301 | 1.323927356  | 0.00016231 | Negative |
| gga-miR-19a-3p | 59718.13 | 75391.42 | -0.326664913 | 0         | SPSB1   | 27.4066 | 9.02063 | 1.603223262  | 0.00016231 | Negative |
| gga-miR-19a-3p | 59718.13 | 75391.42 | -0.326664913 | 0         | OTUD1   | 54.4932 | 25.3752 | 1.102657019  | 0.00016231 | Negative |
| gga-miR-19a-3p | 59718.13 | 75391.42 | -0.326664913 | 0         | FBXO32  | 103.023 | 40.3665 | 1.351736049  | 0.00016231 | Negative |
| gga-miR-19a-3p | 59718.13 | 75391.42 | -0.326664913 | 0         | TGIF1   | 11.6257 | 5.20682 | 1.158843147  | 0.00016231 | Negative |
| gga-miR-19a-3p | 59718.13 | 75391.42 | -0.326664913 | 0         | CCNL1   | 30.6763 | 13.2045 | 1.21609481   | 0.00016231 | Negative |
| gga-miR-19a-3p | 59718.13 | 75391.42 | -0.326664913 | 0         | DIRC2   | 52.0867 | 21.3661 | 1.285591443  | 0.00016231 | Negative |
| gga-miR-19a-3p | 59718.13 | 75391.42 | -0.326664913 | 0         | MN1     | 51.1796 | 23.2701 | 1.137091461  | 0.00016231 | Negative |
| gga-miR-19a-3p | 59718.13 | 75391.42 | -0.326664913 | 0         | USP31   | 12.5615 | 5.98806 | 1.068848168  | 0.00016231 | Negative |
| gga-miR-19a-3p | 59718.13 | 75391.42 | -0.326664913 | 0         | RBFOX2  | 175.251 | 77.2247 | 1.18228841   | 0.00016231 | Negative |
| gga-miR-107-3p | 57663.43 | 59591.36 | -0.037880075 | 1.61E-05  | IRS2    | 14.5185 | 2.42436 | 2.582216557  | 0.00016231 | Negative |
| gga-miR-107-3p | 57663.43 | 59591.36 | -0.037880075 | 1.61E-05  | RAB40B  | 11.8084 | 5.28659 | 1.159404149  | 0.00016231 | Negative |
| gga-miR-107-3p | 57663.43 | 59591.36 | -0.037880075 | 1.61E-05  | RBM24   | 180.272 | 82.9118 | 1.120525988  | 0.00016231 | Negative |
| gga-miR-16-5p  | 56158.77 | 85642.55 | -0.599249972 | 0         | IRS2    | 14.5185 | 2.42436 | 2.582216557  | 0.00016231 | Negative |
| gga-miR-16-5p  | 56158.77 | 85642.55 | -0.599249972 | 0         | SESN1   | 622.095 | 228.65  | 1.443993992  | 0.00016231 | Negative |
| gga-miR-16-5p  | 56158.77 | 85642.55 | -0.599249972 | 0         | PURA    | 37.3771 | 8.76602 | 2.092160763  | 0.00016231 | Negative |

|                 |          |          |              |          |         |         |         |              |            |          |
|-----------------|----------|----------|--------------|----------|---------|---------|---------|--------------|------------|----------|
| gga-miR-16-5p   | 56158.77 | 85642.55 | -0.599249972 | 0        | RAB40B  | 11.8084 | 5.28659 | 1.159404149  | 0.00016231 | Negative |
| gga-miR-16-5p   | 56158.77 | 85642.55 | -0.599249972 | 0        | IRS1    | 129.587 | 37.5296 | 1.787820177  | 0.00016231 | Negative |
| gga-miR-16-5p   | 56158.77 | 85642.55 | -0.599249972 | 0        | RBM24   | 180.272 | 82.9118 | 1.120525988  | 0.00016231 | Negative |
| gga-miR-16-5p   | 56158.77 | 85642.55 | -0.599249972 | 0        | SYDE2   | 13.1015 | 6.3583  | 1.043019003  | 0.00016231 | Negative |
| gga-miR-16-5p   | 56158.77 | 85642.55 | -0.599249972 | 0        | TMCC1   | 25.5803 | 12.7855 | 1.000524603  | 0.00016231 | Negative |
| gga-miR-16-5p   | 56158.77 | 85642.55 | -0.599249972 | 0        | MAFA    | 207.582 | 64.3924 | 1.688719022  | 0.00016231 | Negative |
| gga-miR-15b-5p  | 52240.3  | 54724.75 | -0.057463834 | 2.08E-10 | IRS2    | 14.5185 | 2.42436 | 2.582216557  | 0.00016231 | Negative |
| gga-miR-15b-5p  | 52240.3  | 54724.75 | -0.057463834 | 2.08E-10 | SESN1   | 622.095 | 228.65  | 1.443993992  | 0.00016231 | Negative |
| gga-miR-15b-5p  | 52240.3  | 54724.75 | -0.057463834 | 2.08E-10 | PURA    | 37.3771 | 8.76602 | 2.092160763  | 0.00016231 | Negative |
| gga-miR-15b-5p  | 52240.3  | 54724.75 | -0.057463834 | 2.08E-10 | RAB40B  | 11.8084 | 5.28659 | 1.159404149  | 0.00016231 | Negative |
| gga-miR-15b-5p  | 52240.3  | 54724.75 | -0.057463834 | 2.08E-10 | IRS1    | 129.587 | 37.5296 | 1.787820177  | 0.00016231 | Negative |
| gga-miR-15b-5p  | 52240.3  | 54724.75 | -0.057463834 | 2.08E-10 | RBM24   | 180.272 | 82.9118 | 1.120525988  | 0.00016231 | Negative |
| gga-miR-15b-5p  | 52240.3  | 54724.75 | -0.057463834 | 2.08E-10 | SYDE2   | 13.1015 | 6.3583  | 1.043019003  | 0.00016231 | Negative |
| gga-miR-15b-5p  | 52240.3  | 54724.75 | -0.057463834 | 2.08E-10 | TMCC1   | 25.5803 | 12.7855 | 1.000524603  | 0.00016231 | Negative |
| gga-miR-15b-5p  | 52240.3  | 54724.75 | -0.057463834 | 2.08E-10 | MAFA    | 207.582 | 64.3924 | 1.688719022  | 0.00016231 | Negative |
| gga-miR-221-3p  | 50108.32 | 48024.93 | 0.070833101  | 4.73E-14 | VAPB    | 11.1896 | 23.6654 | -1.080620843 | 0.00016231 | Negative |
| gga-miR-221-3p  | 50108.32 | 48024.93 | 0.070833101  | 4.73E-14 | PNRC2   | 6.9864  | 19.5883 | -1.487371046 | 0.00016231 | Negative |
| gga-miR-222a    | 31511.46 | 36959.96 | -0.220520153 | 5.73E-88 | CDKN1B  | 67.5216 | 26.4149 | 1.353997142  | 0.00016231 | Negative |
| gga-miR-222a    | 31511.46 | 36959.96 | -0.220520153 | 5.73E-88 | FOS     | 13.2273 | 5.88745 | 1.167803796  | 0.00016231 | Negative |
| gga-miR-222a    | 31511.46 | 36959.96 | -0.220520153 | 5.73E-88 | TMCC1   | 25.5803 | 12.7855 | 1.000524603  | 0.00016231 | Negative |
| gga-miR-222a    | 31511.46 | 36959.96 | -0.220520153 | 5.73E-88 | RBM24   | 180.272 | 82.9118 | 1.120525988  | 0.00016231 | Negative |
| gga-miR-222a    | 31511.46 | 36959.96 | -0.220520153 | 5.73E-88 | SRSF2   | 22.0181 | 6.40417 | 1.78160647   | 0.00016231 | Negative |
| gga-miR-222a    | 31511.46 | 36959.96 | -0.220520153 | 5.73E-88 | FOXO3   | 237.178 | 107.708 | 1.138844786  | 0.00016231 | Negative |
| gga-miR-365-3p  | 27974.83 | 26158.05 | 0.10644081   | 3.39E-17 | DCUN1D5 | 14.6026 | 34.1085 | -1.223906046 | 0.00016231 | Negative |
| gga-miR-365-3p  | 27974.83 | 26158.05 | 0.10644081   | 3.39E-17 | HSPA8   | 75.6842 | 422.686 | -2.481522272 | 0.00016231 | Negative |
| gga-miR-193a-3p | 27315.69 | 30161.5  | -0.13341187  | 6.28E-28 | SRSF2   | 22.0181 | 6.40417 | 1.78160647   | 0.00016231 | Negative |
| gga-miR-193a-3p | 27315.69 | 30161.5  | -0.13341187  | 6.28E-28 | ADCY9   | 96.6021 | 45.5592 | 1.084312137  | 0.00016231 | Negative |
| gga-miR-454-3p  | 26265.61 | 42837.71 | -0.696139826 | 0        | PMEP1A1 | 10.6419 | 3.70473 | 1.522315444  | 0.00016231 | Negative |
| gga-miR-454-3p  | 26265.61 | 42837.71 | -0.696139826 | 0        | FBXO48  | 11.4122 | 5.15348 | 1.146958058  | 0.00016231 | Negative |
| gga-miR-454-3p  | 26265.61 | 42837.71 | -0.696139826 | 0        | TRIB1   | 19.8524 | 9.6717  | 1.037472028  | 0.00016231 | Negative |
| gga-miR-454-3p  | 26265.61 | 42837.71 | -0.696139826 | 0        | MEX3D   | 12.0299 | 3.54358 | 1.763345125  | 0.00016231 | Negative |
| gga-miR-454-3p  | 26265.61 | 42837.71 | -0.696139826 | 0        | SRSF2   | 22.0181 | 6.40417 | 1.78160647   | 0.00016231 | Negative |
| gga-miR-454-3p  | 26265.61 | 42837.71 | -0.696139826 | 0        | BHLHE40 | 36.8113 | 11.4009 | 1.691000983  | 0.00016231 | Negative |
| gga-miR-454-3p  | 26265.61 | 42837.71 | -0.696139826 | 0        | EIF4E3  | 11.3358 | 5.50082 | 1.043167609  | 0.00016231 | Negative |
| gga-miR-454-3p  | 26265.61 | 42837.71 | -0.696139826 | 0        | RBFOX2  | 175.251 | 77.2247 | 1.18228841   | 0.00016231 | Negative |
| gga-miR-206     | 26129.24 | 36261.21 | -0.463195462 | 0        | TMCC1   | 25.5803 | 12.7855 | 1.000524603  | 0.00016231 | Negative |
| gga-miR-206     | 26129.24 | 36261.21 | -0.463195462 | 0        | EIF4E3  | 11.3358 | 5.50082 | 1.043167609  | 0.00016231 | Negative |
| gga-miR-17-5p   | 23906.35 | 28303.64 | -0.234027283 | 1.05E-75 | FBXO48  | 11.4122 | 5.15348 | 1.146958058  | 0.00016231 | Negative |
| gga-miR-17-5p   | 23906.35 | 28303.64 | -0.234027283 | 1.05E-75 | SEMA7A  | 23.4429 | 10.57   | 1.149175672  | 0.00016231 | Negative |
| gga-miR-17-5p   | 23906.35 | 28303.64 | -0.234027283 | 1.05E-75 | IRF2BP2 | 162.342 | 45.4908 | 1.835389581  | 0.00016231 | Negative |
| gga-miR-17-5p   | 23906.35 | 28303.64 | -0.234027283 | 1.05E-75 | USP31   | 12.5615 | 5.98806 | 1.068848168  | 0.00016231 | Negative |
| gga-miR-17-5p   | 23906.35 | 28303.64 | -0.234027283 | 1.05E-75 | PGP     | 81.4477 | 30.824  | 1.401819868  | 0.00016231 | Negative |
| gga-miR-17-5p   | 23906.35 | 28303.64 | -0.234027283 | 1.05E-75 | MEX3D   | 12.0299 | 3.54358 | 1.763345125  | 0.00016231 | Negative |
| gga-miR-17-5p   | 23906.35 | 28303.64 | -0.234027283 | 1.05E-75 | DUSP8   | 17.9613 | 8.31334 | 1.111391652  | 0.00016231 | Negative |
| gga-miR-17-5p   | 23906.35 | 28303.64 | -0.234027283 | 1.05E-75 | TMCC1   | 25.5803 | 12.7855 | 1.000524603  | 0.00016231 | Negative |
| gga-miR-17-5p   | 23906.35 | 28303.64 | -0.234027283 | 1.05E-75 | RBM24   | 180.272 | 82.9118 | 1.120525988  | 0.00016231 | Negative |
| gga-miR-24-3p   | 18037.72 | 29569.61 | -0.703531782 | 0        | DUSP8   | 17.9613 | 8.31334 | 1.111391652  | 0.00016231 | Negative |
| gga-miR-24-3p   | 18037.72 | 29569.61 | -0.703531782 | 0        | SESN1   | 622.095 | 228.65  | 1.443993992  | 0.00016231 | Negative |
| gga-miR-20a-5p  | 17755.88 | 20913.29 | -0.226556733 | 6.19E-53 | FBXO48  | 11.4122 | 5.15348 | 1.146958058  | 0.00016231 | Negative |
| gga-miR-20a-5p  | 17755.88 | 20913.29 | -0.226556733 | 6.19E-53 | SEMA7A  | 23.4429 | 10.57   | 1.149175672  | 0.00016231 | Negative |
| gga-miR-20a-5p  | 17755.88 | 20913.29 | -0.226556733 | 6.19E-53 | IRF2BP2 | 162.342 | 45.4908 | 1.835389581  | 0.00016231 | Negative |

|                 |          |          |              |           |          |         |         |              |            |          |
|-----------------|----------|----------|--------------|-----------|----------|---------|---------|--------------|------------|----------|
| gga-miR-20a-5p  | 17755.88 | 20913.29 | -0.226556733 | 6.19E-53  | USP31    | 12.5615 | 5.98806 | 1.068848168  | 0.00016231 | Negative |
| gga-miR-20a-5p  | 17755.88 | 20913.29 | -0.226556733 | 6.19E-53  | PGP      | 81.4477 | 30.824  | 1.401819868  | 0.00016231 | Negative |
| gga-miR-20a-5p  | 17755.88 | 20913.29 | -0.226556733 | 6.19E-53  | MEX3D    | 12.0299 | 3.54358 | 1.763345125  | 0.00016231 | Negative |
| gga-miR-20a-5p  | 17755.88 | 20913.29 | -0.226556733 | 6.19E-53  | DUSP8    | 17.9613 | 8.31334 | 1.111391652  | 0.00016231 | Negative |
| gga-miR-20a-5p  | 17755.88 | 20913.29 | -0.226556733 | 6.19E-53  | TMCC1    | 25.5803 | 12.7855 | 1.000524603  | 0.00016231 | Negative |
| gga-miR-20a-5p  | 17755.88 | 20913.29 | -0.226556733 | 6.19E-53  | RBM24    | 180.272 | 82.9118 | 1.120525988  | 0.00016231 | Negative |
| gga-miR-106-5p  | 15701.18 | 19647.31 | -0.313892371 | 1.17E-91  | FBXO48   | 11.4122 | 5.15348 | 1.146958058  | 0.00016231 | Negative |
| gga-miR-106-5p  | 15701.18 | 19647.31 | -0.313892371 | 1.17E-91  | SEMA7A   | 23.4429 | 10.57   | 1.149175672  | 0.00016231 | Negative |
| gga-miR-106-5p  | 15701.18 | 19647.31 | -0.313892371 | 1.17E-91  | IRF2BP2  | 162.342 | 45.4908 | 1.835389581  | 0.00016231 | Negative |
| gga-miR-106-5p  | 15701.18 | 19647.31 | -0.313892371 | 1.17E-91  | USP31    | 12.5615 | 5.98806 | 1.068848168  | 0.00016231 | Negative |
| gga-miR-106-5p  | 15701.18 | 19647.31 | -0.313892371 | 1.17E-91  | PGP      | 81.4477 | 30.824  | 1.401819868  | 0.00016231 | Negative |
| gga-miR-106-5p  | 15701.18 | 19647.31 | -0.313892371 | 1.17E-91  | MEX3D    | 12.0299 | 3.54358 | 1.763345125  | 0.00016231 | Negative |
| gga-miR-106-5p  | 15701.18 | 19647.31 | -0.313892371 | 1.17E-91  | DUSP8    | 17.9613 | 8.31334 | 1.111391652  | 0.00016231 | Negative |
| gga-miR-106-5p  | 15701.18 | 19647.31 | -0.313892371 | 1.17E-91  | TMCC1    | 25.5803 | 12.7855 | 1.000524603  | 0.00016231 | Negative |
| gga-miR-106-5p  | 15701.18 | 19647.31 | -0.313892371 | 1.17E-91  | RBM24    | 180.272 | 82.9118 | 1.120525988  | 0.00016231 | Negative |
| gga-miR-215-5p  | 14382.9  | 20757.1  | -0.519683861 | 6.37E-245 | IER5     | 84.9594 | 23.5908 | 1.848549234  | 0.00016231 | Negative |
| gga-miR-29a-3p  | 11632.69 | 9782.55  | 0.25946871   | 9.25E-39  | COL1A2   | 124.212 | 262.943 | -1.081945533 | 0.00016231 | Negative |
| gga-miR-29a-3p  | 11632.69 | 9782.55  | 0.25946871   | 9.25E-39  | FBN1     | 26.6076 | 54.9951 | -1.047464696 | 0.00016231 | Negative |
| gga-miR-29a-3p  | 11632.69 | 9782.55  | 0.25946871   | 9.25E-39  | COL5A2   | 22.4483 | 47.8186 | -1.090965698 | 0.00016231 | Negative |
| gga-miR-29a-3p  | 11632.69 | 9782.55  | 0.25946871   | 9.25E-39  | GMFB     | 1.29095 | 3.38389 | -1.390249547 | 0.00016231 | Negative |
| gga-miR-29a-3p  | 11632.69 | 9782.55  | 0.25946871   | 9.25E-39  | SUV420H1 | 7.31529 | 14.8195 | -1.01850981  | 0.00016231 | Negative |
| gga-miR-29a-3p  | 11632.69 | 9782.55  | 0.25946871   | 9.25E-39  | INSIG1   | 30.6869 | 105.105 | -1.776136485 | 0.00016231 | Negative |
| gga-miR-29c-3p  | 11632.69 | 9782.55  | 0.25946871   | 9.25E-39  | COL1A2   | 124.212 | 262.943 | -1.081945533 | 0.00016231 | Negative |
| gga-miR-29c-3p  | 11632.69 | 9782.55  | 0.25946871   | 9.25E-39  | FBN1     | 26.6076 | 54.9951 | -1.047464696 | 0.00016231 | Negative |
| gga-miR-29c-3p  | 11632.69 | 9782.55  | 0.25946871   | 9.25E-39  | COL5A2   | 22.4483 | 47.8186 | -1.090965698 | 0.00016231 | Negative |
| gga-miR-29c-3p  | 11632.69 | 9782.55  | 0.25946871   | 9.25E-39  | GMFB     | 1.29095 | 3.38389 | -1.390249547 | 0.00016231 | Negative |
| gga-miR-29c-3p  | 11632.69 | 9782.55  | 0.25946871   | 9.25E-39  | SUV420H1 | 7.31529 | 14.8195 | -1.01850981  | 0.00016231 | Negative |
| gga-miR-29c-3p  | 11632.69 | 9782.55  | 0.25946871   | 9.25E-39  | INSIG1   | 30.6869 | 105.105 | -1.776136485 | 0.00016231 | Negative |
| gga-miR-16c-5p  | 11005.37 | 13366.75 | -0.270874638 | 9.68E-48  | IRS2     | 14.5185 | 2.42436 | 2.582216557  | 0.00016231 | Negative |
| gga-miR-16c-5p  | 11005.37 | 13366.75 | -0.270874638 | 9.68E-48  | SESN1    | 622.095 | 228.65  | 1.443993992  | 0.00016231 | Negative |
| gga-miR-16c-5p  | 11005.37 | 13366.75 | -0.270874638 | 9.68E-48  | PURA     | 37.3771 | 8.76602 | 2.092160763  | 0.00016231 | Negative |
| gga-miR-16c-5p  | 11005.37 | 13366.75 | -0.270874638 | 9.68E-48  | RAB40B   | 11.8084 | 5.28659 | 1.159404149  | 0.00016231 | Negative |
| gga-miR-16c-5p  | 11005.37 | 13366.75 | -0.270874638 | 9.68E-48  | IRS1     | 129.587 | 37.5296 | 1.787820177  | 0.00016231 | Negative |
| gga-miR-16c-5p  | 11005.37 | 13366.75 | -0.270874638 | 9.68E-48  | RBM24    | 180.272 | 82.9118 | 1.120525988  | 0.00016231 | Negative |
| gga-miR-16c-5p  | 11005.37 | 13366.75 | -0.270874638 | 9.68E-48  | SYDE2    | 13.1015 | 6.3583  | 1.043019003  | 0.00016231 | Negative |
| gga-miR-16c-5p  | 11005.37 | 13366.75 | -0.270874638 | 9.68E-48  | TMCC1    | 25.5803 | 12.7855 | 1.000524603  | 0.00016231 | Negative |
| gga-miR-16c-5p  | 11005.37 | 13366.75 | -0.270874638 | 9.68E-48  | MAFA     | 207.582 | 64.3924 | 1.688719022  | 0.00016231 | Negative |
| gga-miR-142-3p  | 10428.06 | 7423.23  | 0.499918257  | 4.44E-116 | APP      | 9.48344 | 19.6984 | -1.054596073 | 0.00016231 | Negative |
| gga-miR-142-3p  | 10428.06 | 7423.23  | 0.499918257  | 4.44E-116 | SLC35F5  | 8.15139 | 16.5146 | -1.018624028 | 0.00016231 | Negative |
| gga-miR-142-3p  | 10428.06 | 7423.23  | 0.499918257  | 4.44E-116 | ROCK2    | 50.0104 | 104.56  | -1.064030997 | 0.00016231 | Negative |
| gga-miR-142-3p  | 10428.06 | 7423.23  | 0.499918257  | 4.44E-116 | XPO1     | 15.2124 | 35.4973 | -1.222461515 | 0.00016231 | Negative |
| gga-miR-196-5p  | 9318.88  | 11221.16 | -0.258426903 | 6.42E-37  | CDKN1B   | 67.5216 | 26.4149 | 1.353997142  | 0.00016231 | Negative |
| gga-miR-130b-3p | 6614.13  | 10662.16 | -0.679309987 | 1.30E-203 | PMEP1A1  | 10.6419 | 3.70473 | 1.522315444  | 0.00016231 | Negative |
| gga-miR-130b-3p | 6614.13  | 10662.16 | -0.679309987 | 1.30E-203 | FBXO48   | 11.4122 | 5.15348 | 1.146958058  | 0.00016231 | Negative |
| gga-miR-130b-3p | 6614.13  | 10662.16 | -0.679309987 | 1.30E-203 | TRIB1    | 19.8524 | 9.6717  | 1.037472028  | 0.00016231 | Negative |
| gga-miR-130b-3p | 6614.13  | 10662.16 | -0.679309987 | 1.30E-203 | MEX3D    | 12.0299 | 3.54358 | 1.763345125  | 0.00016231 | Negative |
| gga-miR-130b-3p | 6614.13  | 10662.16 | -0.679309987 | 1.30E-203 | SRSF2    | 22.0181 | 6.40417 | 1.78160647   | 0.00016231 | Negative |
| gga-miR-130b-3p | 6614.13  | 10662.16 | -0.679309987 | 1.30E-203 | BHLHE40  | 36.8113 | 11.4009 | 1.691000983  | 0.00016231 | Negative |
| gga-miR-130b-3p | 6614.13  | 10662.16 | -0.679309987 | 1.30E-203 | EIF4E3   | 11.3358 | 5.50082 | 1.043167609  | 0.00016231 | Negative |
| gga-miR-130b-3p | 6614.13  | 10662.16 | -0.679309987 | 1.30E-203 | RBFOX2   | 175.251 | 77.2247 | 1.18228841   | 0.00016231 | Negative |
| gga-miR-489-3p  | 6582.31  | 3822.59  | 0.793609947  | 3.09E-166 | FBN1     | 26.6076 | 54.9951 | -1.047464696 | 0.00016231 | Negative |

|                 |         |         |              |           |         |         |          |              |            |          |
|-----------------|---------|---------|--------------|-----------|---------|---------|----------|--------------|------------|----------|
| gga-miR-489-3p  | 6582.31 | 3822.59 | 0.793609947  | 3.09E-166 | XPO1    | 15.2124 | 35.4973  | -1.222461515 | 0.00016231 | Negative |
| gga-miR-489-3p  | 6582.31 | 3822.59 | 0.793609947  | 3.09E-166 | ARHGAP5 | 9.52823 | 20.7222  | -1.120897033 | 0.00016231 | Negative |
| gga-miR-489-3p  | 6582.31 | 3822.59 | 0.793609947  | 3.09E-166 | VAPB    | 11.1896 | 23.6654  | -1.080620843 | 0.00016231 | Negative |
| gga-miR-218-5p  | 6523.22 | 3337.58 | 0.97634831   | 1.72E-233 | GNB1    | 8.30324 | 18.3398  | -1.143231602 | 0.00016231 | Negative |
| gga-miR-218-5p  | 6523.22 | 3337.58 | 0.97634831   | 1.72E-233 | VASH2   | 7.33012 | 14.702   | -1.004103705 | 0.00016231 | Negative |
| gga-miR-218-5p  | 6523.22 | 3337.58 | 0.97634831   | 1.72E-233 | ARHGAP5 | 9.52823 | 20.7222  | -1.120897033 | 0.00016231 | Negative |
| gga-miR-218-5p  | 6523.22 | 3337.58 | 0.97634831   | 1.72E-233 | INSIG1  | 30.6869 | 105.105  | -1.776136485 | 0.00016231 | Negative |
| gga-miR-1416-5p | 6400.48 | 5680.46 | 0.181738783  | 1.39E-11  | HNRNPA3 | 6.80745 | 18.0362  | -1.405709027 | 0.00016231 | Negative |
| gga-miR-1416-5p | 6400.48 | 5680.46 | 0.181738783  | 1.39E-11  | DCUN1D5 | 14.6026 | 34.1085  | -1.223906046 | 0.00016231 | Negative |
| gga-miR-20b-5p  | 6200.47 | 7875.37 | -0.335403686 | 2.62E-42  | FBXO48  | 11.4122 | 5.15348  | 1.146958058  | 0.00016231 | Negative |
| gga-miR-20b-5p  | 6200.47 | 7875.37 | -0.335403686 | 2.62E-42  | SEMA7A  | 23.4429 | 10.57    | 1.149175672  | 0.00016231 | Negative |
| gga-miR-20b-5p  | 6200.47 | 7875.37 | -0.335403686 | 2.62E-42  | IRF2BP2 | 162.342 | 45.4908  | 1.835389581  | 0.00016231 | Negative |
| gga-miR-20b-5p  | 6200.47 | 7875.37 | -0.335403686 | 2.62E-42  | USP31   | 12.5615 | 5.98806  | 1.068848168  | 0.00016231 | Negative |
| gga-miR-20b-5p  | 6200.47 | 7875.37 | -0.335403686 | 2.62E-42  | PGP     | 81.4477 | 30.824   | 1.401819868  | 0.00016231 | Negative |
| gga-miR-20b-5p  | 6200.47 | 7875.37 | -0.335403686 | 2.62E-42  | MEX3D   | 12.0299 | 3.54358  | 1.763345125  | 0.00016231 | Negative |
| gga-miR-20b-5p  | 6200.47 | 7875.37 | -0.335403686 | 2.62E-42  | DUSP8   | 17.9613 | 8.31334  | 1.111391652  | 0.00016231 | Negative |
| gga-miR-20b-5p  | 6200.47 | 7875.37 | -0.335403686 | 2.62E-42  | TMCC1   | 25.5803 | 12.7855  | 1.000524603  | 0.00016231 | Negative |
| gga-miR-20b-5p  | 6200.47 | 7875.37 | -0.335403686 | 2.62E-42  | RBM24   | 180.272 | 82.9118  | 1.120525988  | 0.00016231 | Negative |
| gga-miR-223     | 6027.73 | 3904.8  | 0.635932582  | 1.00E-103 | HSP90B1 | 12.235  | 48.3257  | -1.981776529 | 0.00016231 | Negative |
| gga-miR-223     | 6027.73 | 3904.8  | 0.635932582  | 1.00E-103 | ARHGAP5 | 9.52823 | 20.7222  | -1.120897033 | 0.00016231 | Negative |
| gga-miR-155     | 5204.94 | 1759.22 | 1.574512065  | 0         | RAP1B   | 4.66868 | 10.6201  | -1.185710739 | 0.00016231 | Negative |
| gga-miR-205a    | 4900.37 | 2137.36 | 1.206627201  | 2.97E-247 | HNRNPH3 | 17.512  | 35.4095  | -1.015792613 | 0.00016231 | Negative |
| gga-miR-204     | 4336.69 | 2762.13 | 0.66037954   | 4.14E-80  | TPPP    | 3.7568  | 10.0241  | -1.415896493 | 0.00016231 | Negative |
| gga-miR-211     | 4336.69 | 2762.13 | 0.66037954   | 4.14E-80  | TPPP    | 3.7568  | 10.0241  | -1.415896493 | 0.00016231 | Negative |
| gga-miR-190a-5p | 4073.03 | 4858.39 | -0.244809421 | 4.22E-15  | CDKN1B  | 67.5216 | 26.4149  | 1.353997142  | 0.00016231 | Negative |
| gga-miR-140-5p  | 3682.1  | 4258.29 | -0.200178953 | 1.83E-09  | KLF9    | 92.8131 | 43.0242  | 1.109180081  | 0.00016231 | Negative |
| gga-miR-140-5p  | 3682.1  | 4258.29 | -0.200178953 | 1.83E-09  | GOT2    | 227.843 | 71.4575  | 1.672882701  | 0.00016231 | Negative |
| gga-miR-499-5p  | 3477.53 | 4200.74 | -0.263014091 | 5.47E-15  | FZD8    | 12.1101 | 4.16917  | 1.538378673  | 0.00016231 | Negative |
| gga-miR-144-3p  | 3209.33 | 1972.95 | 0.711484191  | 8.31E-68  | GOLGA4  | 5.28505 | 13.4586  | -1.348539319 | 0.00016231 | Negative |
| gga-miR-144-3p  | 3209.33 | 1972.95 | 0.711484191  | 8.31E-68  | AFAP1   | 5.24484 | 10.6248  | -1.018465017 | 0.00016231 | Negative |
| gga-miR-144-3p  | 3209.33 | 1972.95 | 0.711484191  | 8.31E-68  | ROCK2   | 50.0104 | 104.56   | -1.064030997 | 0.00016231 | Negative |
| gga-miR-144-3p  | 3209.33 | 1972.95 | 0.711484191  | 8.31E-68  | FBN1    | 26.6076 | 54.9951  | -1.047464696 | 0.00016231 | Negative |
| gga-miR-144-3p  | 3209.33 | 1972.95 | 0.711484191  | 8.31E-68  | SEL1L   | 5.81898 | 13.1144  | -1.172313611 | 0.00016231 | Negative |
| gga-miR-144-3p  | 3209.33 | 1972.95 | 0.711484191  | 8.31E-68  | RAP1B   | 4.66868 | 10.6201  | -1.185710739 | 0.00016231 | Negative |
| gga-miR-144-3p  | 3209.33 | 1972.95 | 0.711484191  | 8.31E-68  | APP     | 9.48344 | 19.6984  | -1.054596073 | 0.00016231 | Negative |
| gga-miR-144-3p  | 3209.33 | 1972.95 | 0.711484191  | 8.31E-68  | HNRNPA3 | 6.80745 | 18.0362  | -1.405709027 | 0.00016231 | Negative |
| gga-miR-34a-5p  | 3063.87 | 4134.98 | -0.422958824 | 1.67E-34  | IRF2BP2 | 162.342 | 45.4908  | 1.835389581  | 0.00016231 | Negative |
| gga-miR-455-5p  | 2386.54 | 2712.81 | -0.175301048 | 3.23E-05  | RXRA    | 58.7086 | 24.9276  | 1.235827865  | 0.00016231 | Negative |
| gga-miR-455-5p  | 2386.54 | 2712.81 | -0.175301048 | 3.23E-05  | CDKN1B  | 67.5216 | 26.4149  | 1.353997142  | 0.00016231 | Negative |
| gga-miR-10a-5p  | 2368.36 | 2753.91 | -0.208026576 | 6.49E-07  | SMCR8   | 68.3574 | 30.7539  | 1.15232815   | 0.00016231 | Negative |
| gga-miR-10a-5p  | 2368.36 | 2753.91 | -0.208026576 | 6.49E-07  | SDK1    | 3.11991 | 0.916462 | 1.767357445  | 0.00016231 | Negative |
| gga-miR-153-3p  | 2145.62 | 1644.13 | 0.393636657  | 2.22E-16  | APP     | 9.48344 | 19.6984  | -1.054596073 | 0.00016231 | Negative |
| gga-miR-153-3p  | 2145.62 | 1644.13 | 0.393636657  | 2.22E-16  | ROCK1   | 3.97387 | 12.3142  | -1.631706323 | 0.00016231 | Negative |
| gga-miR-153-3p  | 2145.62 | 1644.13 | 0.393636657  | 2.22E-16  | ROCK2   | 50.0104 | 104.56   | -1.064030997 | 0.00016231 | Negative |
| gga-miR-153-3p  | 2145.62 | 1644.13 | 0.393636657  | 2.22E-16  | VASH2   | 7.33012 | 14.702   | -1.004103705 | 0.00016231 | Negative |
| gga-miR-9-5p    | 1495.57 | 1035.8  | 0.539516416  | 3.95E-20  | FBN1    | 26.6076 | 54.9951  | -1.047464696 | 0.00016231 | Negative |
| gga-miR-9-5p    | 1495.57 | 1035.8  | 0.539516416  | 3.95E-20  | INSIG1  | 30.6869 | 105.105  | -1.776136485 | 0.00016231 | Negative |
| gga-miR-9-5p    | 1495.57 | 1035.8  | 0.539516416  | 3.95E-20  | RAP1B   | 4.66868 | 10.6201  | -1.185710739 | 0.00016231 | Negative |
| gga-miR-9-5p    | 1495.57 | 1035.8  | 0.539516416  | 3.95E-20  | ITGA6   | 10.0755 | 21.6048  | -1.100500441 | 0.00016231 | Negative |
| gga-miR-1729-5p | 1368.28 | 1150.89 | 0.259179981  | 1.59E-05  | TPPP    | 3.7568  | 10.0241  | -1.415896493 | 0.00016231 | Negative |
| gga-miR-183-5p  | 1050.08 | 1257.76 | -0.250790974 | 6.63E-05  | SESN1   | 622.095 | 228.65   | 1.443993992  | 0.00016231 | Negative |

|                |          |          |              |          |       |         |         |              |            |          |
|----------------|----------|----------|--------------|----------|-------|---------|---------|--------------|------------|----------|
| gga-miR-183-5p | 1050.08  | 1257.76  | -0.250790974 | 6.63E-05 | SRSF2 | 22.0181 | 6.40417 | 1.78160647   | 0.00016231 | Negative |
| gga-miR-183-5p | 1050.08  | 1257.76  | -0.250790974 | 6.63E-05 | EEF2  | 836.945 | 346.008 | 1.274327424  | 0.00016231 | Negative |
| gga-miR-31-5p  | 200.02   | 8.22     | 4.614428501  | 2.38E-46 | VAPB  | 11.1896 | 23.6654 | -1.080620843 | 0.00016231 | Negative |
| gga-miR-15a    | 66127.71 | 71018.04 | -0.09336416  | 1.80E-32 | FOXO1 | 18.5233 | 9.02954 | 1.036616745  | 0.00016231 | Negative |
| gga-miR-15c-5p | 78633.19 | 83587.39 | -0.078580488 | 2.09E-27 | FOXO1 | 18.5233 | 9.02954 | 1.036616745  | 0.00016231 | Negative |
| gga-miR-15b-5p | 52240.3  | 54724.75 | -0.057463834 | 2.08E-10 | FOXO1 | 18.5233 | 9.02954 | 1.036616745  | 0.00016231 | Negative |
| gga-miR-16-5p  | 56158.77 | 85642.55 | -0.599249972 | 0        | FOXO1 | 18.5233 | 9.02954 | 1.036616745  | 0.00016231 | Negative |
| gga-miR-16c-5p | 11005.37 | 13366.75 | -0.270874638 | 9.68E-48 | FOXO1 | 18.5233 | 9.02954 | 1.036616745  | 0.00016231 | Negative |

<sup>a</sup>The correlation expression patterns between miRNAs and their targets.

**Table S5. Differentially expressed miRNAs and their corresponding target lncRNAs with differential expression in hypertrophic broiler compared with leaner broiler.**

| lncRNA name    | WRR-FPKM | XH-FPKM | log2(WRR/XH) | q value    | miRNA name      | WRR-FPKM   | XH-FPKM   | log2(WRR/XH) | q value   | mfe(kcal/mol) | Binding position | Correlation <sup>a</sup> |
|----------------|----------|---------|--------------|------------|-----------------|------------|-----------|--------------|-----------|---------------|------------------|--------------------------|
| TCONS_00001532 | 281.185  | 124.35  | 1.177113127  | 0.00065227 | gga-miR-19b-3p  | 61345.53   | 77980.92  | -0.336596508 | 0         | -21.5         | 1252             | Negative                 |
| TCONS_00001532 | 281.185  | 124.35  | 1.177113127  | 0.00065227 | gga-miR-19a-3p  | 59718.13   | 75391.42  | -0.326664913 | 0         | -21.5         | 1252             | Negative                 |
| TCONS_00001934 | 0        | 13.8781 | -5           | 0.00065227 | gga-miR-29a-3p  | 11632.69   | 9782.55   | 0.25946871   | 9.25E-39  | -23.3         | 715              | Negative                 |
| TCONS_00001934 | 0        | 13.8781 | -5           | 0.00065227 | gga-miR-125b-5p | 404462.27  | 285609.43 | 0.511527957  | 0         | -26.2         | 718              | Negative                 |
| TCONS_00001934 | 0        | 13.8781 | -5           | 0.00065227 | gga-miR-29c-3p  | 11632.69   | 9782.55   | 0.25946871   | 9.25E-39  | -22.4         | 716              | Negative                 |
| TCONS_00003147 | 0        | 13.4177 | -5           | 0.00065227 | gga-miR-22-3p   | 6060606.31 | 5856904.5 | 0.058890194  | 0         | -25.2         | 703              | Negative                 |
| TCONS_00004225 | 123.16   | 51.5558 | 1.256327128  | 0.00065227 | gga-miR-34a-5p  | 3063.87    | 4134.98   | -0.422958824 | 1.67E-34  | -27.9         | 87               | Negative                 |
| TCONS_00004225 | 123.16   | 51.5558 | 1.256327128  | 0.00065227 | gga-miR-183-5p  | 1050.08    | 1257.76   | -0.250790974 | 6.63E-05  | -26           | 517              | Negative                 |
| TCONS_00007441 | 30.191   | 14.8311 | 1.025492939  | 0.00065227 | gga-miR-106-5p  | 15701.18   | 19647.31  | -0.313892371 | 1.17E-91  | -25.3         | 1080             | Negative                 |
| TCONS_00007441 | 30.191   | 14.8311 | 1.025492939  | 0.00065227 | gga-miR-20b-5p  | 6200.47    | 7875.37   | -0.335403686 | 2.62E-42  | -26.1         | 1078             | Negative                 |
| TCONS_00007441 | 30.191   | 14.8311 | 1.025492939  | 0.00065227 | gga-miR-20a-5p  | 17755.88   | 20913.29  | -0.226556733 | 6.19E-53  | -24.9         | 1078             | Negative                 |
| TCONS_00007441 | 30.191   | 14.8311 | 1.025492939  | 0.00065227 | gga-miR-196-5p  | 9318.88    | 11221.16  | -0.258426903 | 6.42E-37  | -21.1         | 1453             | Negative                 |
| TCONS_00007863 | 15.8108  | 34.4929 | -1.125389061 | 0.00065227 | gga-miR-148a-3p | 1311848.77 | 1183894.4 | 0.157627517  | 0         | -25.8         | 1901             | Negative                 |
| TCONS_00008384 | 16.21    | 6.22013 | 1.381867453  | 0.00065227 | gga-miR-16-5p   | 56158.77   | 85642.55  | -0.599249972 | 0         | -25           | 3412             | Negative                 |
| TCONS_00008384 | 16.21    | 6.22013 | 1.381867453  | 0.00065227 | gga-miR-10a-5p  | 2368.36    | 2753.91   | -0.208026576 | 6.49E-07  | -24           | 3887             | Negative                 |
| TCONS_00008384 | 16.21    | 6.22013 | 1.381867453  | 0.00065227 | gga-miR-107-3p  | 57663.43   | 59591.36  | -0.037880075 | 1.61E-05  | -28.3         | 2748             | Negative                 |
| TCONS_00008501 | 24.6292  | 8.88655 | 1.470674428  | 0.00065227 | gga-let-7i      | 271147.69  | 318697.47 | -0.223542244 | 0         | -27           | 741              | Negative                 |
| TCONS_00009382 | 29.2358  | 11.7533 | 1.314670187  | 0.00065227 | gga-miR-215-5p  | 14382.9    | 20757.1   | -0.519683861 | 6.37E-245 | -23.4         | 4481             | Negative                 |
| TCONS_00009382 | 29.2358  | 11.7533 | 1.314670187  | 0.00065227 | gga-miR-107-3p  | 57663.43   | 59591.36  | -0.037880075 | 1.61E-05  | -31.2         | 3477             | Negative                 |
| TCONS_00009388 | 32.9007  | 10.7821 | 1.609480084  | 0.00065227 | gga-miR-16-5p   | 56158.77   | 85642.55  | -0.599249972 | 0         | -22.9         | 894              | Negative                 |
| TCONS_00009388 | 32.9007  | 10.7821 | 1.609480084  | 0.00065227 | gga-let-7i      | 271147.69  | 318697.47 | -0.223542244 | 0         | -27.1         | 1558             | Negative                 |
| TCONS_00009388 | 32.9007  | 10.7821 | 1.609480084  | 0.00065227 | gga-miR-16c-5p  | 11005.37   | 13366.75  | -0.270874638 | 9.68E-48  | -27           | 893              | Negative                 |
| TCONS_00009662 | 30.044   | 14.4353 | 1.057475813  | 0.00065227 | gga-miR-16c-5p  | 11005.37   | 13366.75  | -0.270874638 | 9.68E-48  | -25.5         | 6052             | Negative                 |
| TCONS_00009662 | 30.044   | 14.4353 | 1.057475813  | 0.00065227 | gga-miR-16-5p   | 56158.77   | 85642.55  | -0.599249972 | 0         | -25           | 6051             | Negative                 |
| TCONS_00009662 | 30.044   | 14.4353 | 1.057475813  | 0.00065227 | gga-miR-130b-3p | 6614.13    | 10662.16  | -0.679309987 | 1.30E-203 | -25.6         | 2319             | Negative                 |
| TCONS_00009662 | 30.044   | 14.4353 | 1.057475813  | 0.00065227 | gga-miR-130a-3p | 95161.71   | 100513.67 | -0.069372179 | 7.62E-26  | -25.3         | 2332             | Negative                 |
| TCONS_00012639 | 9.42448  | 26.357  | -1.483701245 | 0.00065227 | gga-miR-29a-3p  | 11632.69   | 9782.55   | 0.25946871   | 9.25E-39  | -22.4         | 286              | Negative                 |
| TCONS_00012639 | 9.42448  | 26.357  | -1.483701245 | 0.00065227 | gga-miR-221-3p  | 50108.32   | 48024.93  | 0.070833101  | 4.73E-14  | -28.5         | 1527             | Negative                 |
| TCONS_00012639 | 9.42448  | 26.357  | -1.483701245 | 0.00065227 | gga-miR-29c-3p  | 11632.69   | 9782.55   | 0.25946871   | 9.25E-39  | -22.3         | 286              | Negative                 |
| TCONS_00012640 | 7.2516   | 28.8383 | -1.991614868 | 0.00065227 | gga-miR-22-3p   | 6060606.31 | 5856904.5 | 0.058890194  | 0         | -28.3         | 328              | Negative                 |
| TCONS_00012643 | 6.23131  | 20.6642 | -1.729526116 | 0.00065227 | gga-miR-218-5p  | 6523.22    | 3337.58   | 0.97634831   | 1.72E-233 | -26.7         | 3535             | Negative                 |
| TCONS_00012643 | 6.23131  | 20.6642 | -1.729526116 | 0.00065227 | gga-miR-101-3p  | 474140.24  | 401158.63 | 0.250707448  | 0         | -22.3         | 1108             | Negative                 |
| TCONS_00012708 | 3.91098  | 14.1338 | -1.853547336 | 0.00065227 | gga-miR-211     | 4336.69    | 2762.13   | 0.66037954   | 4.14E-80  | -25.6         | 2139             | Negative                 |
| TCONS_00012708 | 3.91098  | 14.1338 | -1.853547336 | 0.00065227 | gga-miR-204     | 4336.69    | 2762.13   | 0.66037954   | 4.14E-80  | -25.6         | 2139             | Negative                 |
| TCONS_00013296 | 5.78851  | 19.577  | -1.75789576  | 0.00065227 | gga-miR-218-5p  | 6523.22    | 3337.58   | 0.97634831   | 1.72E-233 | -24.9         | 1210             | Negative                 |
| TCONS_00013525 | 29.4489  | 10.4838 | 1.49005201   | 0.00065227 | gga-miR-34a-5p  | 3063.87    | 4134.98   | -0.422958824 | 1.67E-34  | -28.9         | 2191             | Negative                 |
| TCONS_00013525 | 29.4489  | 10.4838 | 1.49005201   | 0.00065227 | gga-miR-15a     | 66127.71   | 71018.04  | -0.09336416  | 1.80E-32  | -20.9         | 1666             | Negative                 |
| TCONS_00013527 | 34.0586  | 7.7709  | 2.131865532  | 0.00065227 | gga-miR-107-3p  | 57663.43   | 59591.36  | -0.037880075 | 1.61E-05  | -24.9         | 731              | Negative                 |
| TCONS_00014571 | 81.6373  | 33.0739 | 1.303535294  | 0.00065227 | gga-miR-455-5p  | 2386.54    | 2712.81   | -0.175301048 | 3.23E-05  | -25.2         | 2100             | Negative                 |
| TCONS_00014571 | 81.6373  | 33.0739 | 1.303535294  | 0.00065227 | gga-miR-454-3p  | 26265.61   | 42837.71  | -0.696139826 | 0         | -26.2         | 2397             | Negative                 |
| TCONS_00015418 | 79.3531  | 38.1047 | 1.058317627  | 0.00065227 | gga-miR-130b-3p | 6614.13    | 10662.16  | -0.679309987 | 1.30E-203 | -26.3         | 1785             | Negative                 |
| TCONS_00015418 | 79.3531  | 38.1047 | 1.058317627  | 0.00065227 | gga-miR-130a-3p | 95161.71   | 100513.67 | -0.069372179 | 7.62E-26  | -24.1         | 1787             | Negative                 |
| TCONS_00015418 | 79.3531  | 38.1047 | 1.058317627  | 0.00065227 | gga-miR-107-3p  | 57663.43   | 59591.36  | -0.037880075 | 1.61E-05  | -28.1         | 1620             | Negative                 |
| TCONS_00015768 | 7.50805  | 18.7743 | -1.322248955 | 0.00065227 | gga-miR-9-5p    | 1495.57    | 1035.8    | 0.539516416  | 3.95E-20  | -25           | 948              | Negative                 |
| TCONS_00016255 | 23.8493  | 8.24307 | 1.532693271  | 0.00065227 | gga-miR-30c-5p  | 450797.58  | 568867.75 | -0.326047081 | 0         | -21.8         | 1789             | Negative                 |
| TCONS_00016255 | 23.8493  | 8.24307 | 1.532693271  | 0.00065227 | gga-miR-15c-5p  | 78633.19   | 83587.39  | -0.078580488 | 2.09E-27  | -24.7         | 1563             | Negative                 |
| TCONS_00016255 | 23.8493  | 8.24307 | 1.532693271  | 0.00065227 | gga-miR-15b-5p  | 52240.3    | 54724.75  | -0.057463834 | 2.08E-10  | -26.7         | 1563             | Negative                 |
| TCONS_00016255 | 23.8493  | 8.24307 | 1.532693271  | 0.00065227 | gga-miR-130c-3p | 95061.7    | 101023.35 | -0.078186239 | 1.45E-32  | -25.8         | 85               | Negative                 |
| TCONS_00016255 | 23.8493  | 8.24307 | 1.532693271  | 0.00065227 | gga-miR-128-3p  | 99089.28   | 110172.91 | -0.143402193 | 1.43E-113 | -23.1         | 1049             | Negative                 |
| TCONS_00016255 | 23.8493  | 8.24307 | 1.532693271  | 0.00065227 | gga-miR-30a-5p  | 5516178.95 | 6501640.5 | -0.227568083 | 0         | -23.5         | 1804             | Negative                 |



|                |         |         |              |            |                 |           |           |              |           |       |       |          |
|----------------|---------|---------|--------------|------------|-----------------|-----------|-----------|--------------|-----------|-------|-------|----------|
| TCONS_00016255 | 23.8493 | 8.24307 | 1.532693271  | 0.00065227 | gga-miR-15a     | 66127.71  | 71018.04  | -0.09336416  | 1.80E-32  | -25.5 | 1569  | Negative |
| TCONS_00017879 | 19.9329 | 9.69345 | 1.040069488  | 0.00065227 | gga-miR-23b-3p  | 83219.9   | 103843.03 | -0.309837482 | 0         | -26.7 | 1372  | Negative |
| TCONS_00019791 | 42.0528 | 16.3461 | 1.363255397  | 0.00065227 | gga-miR-16c-5p  | 11005.37  | 13366.75  | -0.270874638 | 9.68E-48  | -26.3 | 5399  | Negative |
| TCONS_00021334 | 7.86986 | 18.7209 | -1.250239917 | 0.00065227 | gga-miR-218-5p  | 6523.22   | 3337.58   | 0.97634831   | 1.72E-233 | -25.1 | 1286  | Negative |
| TCONS_00021439 | 33.0566 | 13.0975 | 1.335646883  | 0.00065227 | gga-miR-34a-5p  | 3063.87   | 4134.98   | -0.422958824 | 1.67E-34  | -29.8 | 1607  | Negative |
| TCONS_00021439 | 33.0566 | 13.0975 | 1.335646883  | 0.00065227 | gga-miR-16-5p   | 56158.77  | 85642.55  | -0.599249972 | 0         | -25.6 | 1332  | Negative |
| TCONS_00021439 | 33.0566 | 13.0975 | 1.335646883  | 0.00065227 | gga-miR-15b-5p  | 52240.3   | 54724.75  | -0.057463834 | 2.08E-10  | -27.3 | 1338  | Negative |
| TCONS_00021439 | 33.0566 | 13.0975 | 1.335646883  | 0.00065227 | gga-miR-15a     | 66127.71  | 71018.04  | -0.09336416  | 1.80E-32  | -25.6 | 1339  | Negative |
| TCONS_00022107 | 13.8641 | 32.3627 | -1.22297801  | 0.00065227 | gga-miR-29c-3p  | 11632.69  | 9782.55   | 0.25946871   | 9.25E-39  | -24.1 | 5736  | Negative |
| TCONS_00022107 | 13.8641 | 32.3627 | -1.22297801  | 0.00065227 | gga-miR-29a-3p  | 11632.69  | 9782.55   | 0.25946871   | 9.25E-39  | -24.2 | 5736  | Negative |
| TCONS_00022108 | 7.83267 | 30.5995 | -1.965931997 | 0.00065227 | gga-miR-199-5p  | 157089.1  | 112030.78 | 0.497254361  | 0         | -27.8 | 410   | Negative |
| TCONS_00022125 | 18.023  | 37.1244 | -1.042528536 | 0.00065227 | gga-miR-125b-5p | 404462.27 | 285609.43 | 0.511527957  | 0         | -29.3 | 1147  | Negative |
| TCONS_00022958 | 22.453  | 8.8992  | 1.335160665  | 0.00065227 | gga-miR-16-5p   | 56158.77  | 85642.55  | -0.599249972 | 0         | -23.4 | 2338  | Negative |
| TCONS_00022958 | 22.453  | 8.8992  | 1.335160665  | 0.00065227 | gga-miR-15b-5p  | 52240.3   | 54724.75  | -0.057463834 | 2.08E-10  | -31.3 | 2326  | Negative |
| TCONS_00022958 | 22.453  | 8.8992  | 1.335160665  | 0.00065227 | gga-miR-15c-5p  | 78633.19  | 83587.39  | -0.078580488 | 2.09E-27  | -29.3 | 2326  | Negative |
| TCONS_00022958 | 22.453  | 8.8992  | 1.335160665  | 0.00065227 | gga-miR-15a     | 66127.71  | 71018.04  | -0.09336416  | 1.80E-32  | -26.3 | 2323  | Negative |
| TCONS_00025658 | 48.2642 | 21.1417 | 1.190862078  | 0.00065227 | gga-miR-34a-5p  | 3063.87   | 4134.98   | -0.422958824 | 1.67E-34  | -31.4 | 4294  | Negative |
| TCONS_00025658 | 48.2642 | 21.1417 | 1.190862078  | 0.00065227 | gga-miR-16c-5p  | 11005.37  | 13366.75  | -0.270874638 | 9.68E-48  | -27.3 | 296   | Negative |
| TCONS_00025658 | 48.2642 | 21.1417 | 1.190862078  | 0.00065227 | gga-miR-16-5p   | 56158.77  | 85642.55  | -0.599249972 | 0         | -27.4 | 316   | Negative |
| TCONS_00027797 | 43.1275 | 13.6649 | 1.658133187  | 0.00065227 | gga-miR-16c-5p  | 11005.37  | 13366.75  | -0.270874638 | 9.68E-48  | -29.1 | 11736 | Negative |
| TCONS_00027797 | 43.1275 | 13.6649 | 1.658133187  | 0.00065227 | gga-miR-107-3p  | 57663.43  | 59591.36  | -0.037880075 | 1.61E-05  | -34.7 | 5111  | Negative |
| TCONS_00028187 | 30.5135 | 0       | 5            | 0.00065227 | gga-miR-24-3p   | 18037.72  | 29569.61  | -0.703531782 | 0         | -27.4 | 257   | Negative |
| TCONS_00028217 | 161.733 | 28.2837 | 2.515571309  | 0.00065227 | gga-miR-34a-5p  | 3063.87   | 4134.98   | -0.422958824 | 1.67E-34  | -33   | 2085  | Negative |
| TCONS_00028217 | 161.733 | 28.2837 | 2.515571309  | 0.00065227 | gga-miR-128-3p  | 99089.28  | 110172.91 | -0.143402193 | 1.43E-113 | -29.3 | 884   | Negative |
| TCONS_00028367 | 49.1918 | 14.5421 | 1.758182225  | 0.00065227 | gga-miR-24-3p   | 18037.72  | 29569.61  | -0.703531782 | 0         | -34.8 | 2418  | Negative |
| TCONS_00028367 | 49.1918 | 14.5421 | 1.758182225  | 0.00065227 | gga-miR-16c-5p  | 11005.37  | 13366.75  | -0.270874638 | 9.68E-48  | -32.9 | 3633  | Negative |
| TCONS_00028367 | 49.1918 | 14.5421 | 1.758182225  | 0.00065227 | gga-miR-16-5p   | 56158.77  | 85642.55  | -0.599249972 | 0         | -28.6 | 2741  | Negative |
| TCONS_00028367 | 49.1918 | 14.5421 | 1.758182225  | 0.00065227 | gga-miR-128-3p  | 99089.28  | 110172.91 | -0.143402193 | 1.43E-113 | -24.1 | 3229  | Negative |
| TCONS_00028367 | 49.1918 | 14.5421 | 1.758182225  | 0.00065227 | gga-miR-15c-5p  | 78633.19  | 83587.39  | -0.078580488 | 2.09E-27  | -33   | 3637  | Negative |
| TCONS_00028367 | 49.1918 | 14.5421 | 1.758182225  | 0.00065227 | gga-miR-15b-5p  | 52240.3   | 54724.75  | -0.057463834 | 2.08E-10  | -36   | 3637  | Negative |
| TCONS_00028367 | 49.1918 | 14.5421 | 1.758182225  | 0.00065227 | gga-miR-15a     | 66127.71  | 71018.04  | -0.09336416  | 1.80E-32  | -28.5 | 875   | Negative |
| TCONS_00028370 | 0       | 23.8278 | -5           | 0.00065227 | gga-miR-29a-3p  | 11632.69  | 9782.55   | 0.25946871   | 9.25E-39  | -27.6 | 308   | Negative |
| TCONS_00028370 | 0       | 23.8278 | -5           | 0.00065227 | gga-miR-29c-3p  | 11632.69  | 9782.55   | 0.25946871   | 9.25E-39  | -26.9 | 309   | Negative |
| TCONS_00028442 | 51.5242 | 11.0487 | 2.221373569  | 0.00065227 | gga-miR-16c-5p  | 11005.37  | 13366.75  | -0.270874638 | 9.68E-48  | -26.4 | 544   | Negative |
| TCONS_00028442 | 51.5242 | 11.0487 | 2.221373569  | 0.00065227 | gga-miR-16-5p   | 56158.77  | 85642.55  | -0.599249972 | 0         | -26.4 | 543   | Negative |
| TCONS_00028442 | 51.5242 | 11.0487 | 2.221373569  | 0.00065227 | gga-miR-15c-5p  | 78633.19  | 83587.39  | -0.078580488 | 2.09E-27  | -27.8 | 536   | Negative |
| TCONS_00028442 | 51.5242 | 11.0487 | 2.221373569  | 0.00065227 | gga-miR-15b-5p  | 52240.3   | 54724.75  | -0.057463834 | 2.08E-10  | -29.8 | 536   | Negative |
| TCONS_00028442 | 51.5242 | 11.0487 | 2.221373569  | 0.00065227 | gga-miR-15a     | 66127.71  | 71018.04  | -0.09336416  | 1.80E-32  | -26.6 | 542   | Negative |
| TCONS_00028445 | 31.4428 | 9.87547 | 1.67080838   | 0.00065227 | gga-miR-15a     | 66127.71  | 71018.04  | -0.09336416  | 1.80E-32  | -24.1 | 2007  | Negative |
| TCONS_00028728 | 25.9564 | 5.0879  | 2.350948083  | 0.00065227 | gga-miR-34a-5p  | 3063.87   | 4134.98   | -0.422958824 | 1.67E-34  | -32.4 | 2308  | Negative |
| TCONS_00028729 | 21.0019 | 3.83473 | 2.453322944  | 0.00065227 | gga-miR-15c-5p  | 78633.19  | 83587.39  | -0.078580488 | 2.09E-27  | -26.7 | 2415  | Negative |
| TCONS_00028729 | 21.0019 | 3.83473 | 2.453322944  | 0.00065227 | gga-miR-15b-5p  | 52240.3   | 54724.75  | -0.057463834 | 2.08E-10  | -28.5 | 2415  | Negative |
| TCONS_00028729 | 21.0019 | 3.83473 | 2.453322944  | 0.00065227 | gga-miR-15a     | 66127.71  | 71018.04  | -0.09336416  | 1.80E-32  | -24.2 | 2415  | Negative |
| TCONS_00028738 | 24.7528 | 9.78763 | 1.33856026   | 0.00065227 | gga-miR-183-5p  | 1050.08   | 1257.76   | -0.250790974 | 6.63E-05  | -27.6 | 3789  | Negative |
| TCONS_00028868 | 25.3254 | 3.65309 | 2.793395853  | 0.00065227 | gga-miR-15a     | 66127.71  | 71018.04  | -0.09336416  | 1.80E-32  | -23.4 | 2530  | Negative |
| TCONS_00028868 | 25.3254 | 3.65309 | 2.793395853  | 0.00065227 | gga-miR-24-3p   | 18037.72  | 29569.61  | -0.703531782 | 0         | -34.3 | 1260  | Negative |
| TCONS_00028868 | 25.3254 | 3.65309 | 2.793395853  | 0.00065227 | gga-miR-19a-3p  | 59718.13  | 75391.42  | -0.326664913 | 0         | -23.2 | 128   | Negative |
| TCONS_00029092 | 22.9055 | 5.8829  | 1.961094637  | 0.00065227 | gga-miR-222a    | 31511.46  | 36959.96  | -0.220520153 | 5.73E-88  | -29.5 | 1056  | Negative |
| TCONS_00029092 | 22.9055 | 5.8829  | 1.961094637  | 0.00065227 | gga-miR-130c-3p | 95061.7   | 101023.35 | -0.078186239 | 1.45E-32  | -23.2 | 1630  | Negative |
| TCONS_00029092 | 22.9055 | 5.8829  | 1.961094637  | 0.00065227 | gga-miR-130a-3p | 95161.71  | 100513.67 | -0.069372179 | 7.62E-26  | -23.2 | 1630  | Negative |
| TCONS_00029163 | 26.1836 | 12.9231 | 1.018711282  | 0.00065227 | gga-miR-16c-5p  | 11005.37  | 13366.75  | -0.270874638 | 9.68E-48  | -29.6 | 718   | Negative |
| TCONS_00029163 | 26.1836 | 12.9231 | 1.018711282  | 0.00065227 | gga-miR-16-5p   | 56158.77  | 85642.55  | -0.599249972 | 0         | -25.7 | 712   | Negative |
| TCONS_00029380 | 66.2238 | 23.6615 | 1.484808262  | 0.00065227 | gga-miR-130b-3p | 6614.13   | 10662.16  | -0.679309987 | 1.30E-203 | -25.4 | 2768  | Negative |
| TCONS_00029380 | 66.2238 | 23.6615 | 1.484808262  | 0.00065227 | gga-miR-130c-3p | 95061.7   | 101023.35 | -0.078186239 | 1.45E-32  | -25.7 | 2768  | Negative |

|                |         |         |              |            |                 |             |           |              |           |       |      |          |
|----------------|---------|---------|--------------|------------|-----------------|-------------|-----------|--------------|-----------|-------|------|----------|
| TCONS_00030106 | 91.6641 | 26.3147 | 1.800487869  | 0.00065227 | gga-miR-34a-5p  | 3063.87     | 4134.98   | -0.422958824 | 1.67E-34  | -30.8 | 39   | Negative |
| TCONS_00031421 | 75.5902 | 31.0737 | 1.28250517   | 0.00065227 | gga-miR-30e-5p  | 3635178.24  | 4124439.2 | -0.172605412 | 0         | -22.6 | 1860 | Negative |
| TCONS_00031421 | 75.5902 | 31.0737 | 1.28250517   | 0.00065227 | gga-miR-30a-5p  | 5516178.95  | 6501640.5 | -0.227568083 | 0         | -23.3 | 1859 | Negative |
| TCONS_00037642 | 29.0958 | 13.7318 | 1.083290164  | 0.00065227 | gga-miR-16c-5p  | 11005.37    | 13366.75  | -0.270874638 | 9.68E-48  | -26.5 | 1568 | Negative |
| TCONS_00037642 | 29.0958 | 13.7318 | 1.083290164  | 0.00065227 | gga-miR-15c-5p  | 78633.19    | 83587.39  | -0.078580488 | 2.09E-27  | -27.6 | 1563 | Negative |
| TCONS_00037642 | 29.0958 | 13.7318 | 1.083290164  | 0.00065227 | gga-miR-15b-5p  | 52240.3     | 54724.75  | -0.057463834 | 2.08E-10  | -28.4 | 1555 | Negative |
| TCONS_00037642 | 29.0958 | 13.7318 | 1.083290164  | 0.00065227 | gga-miR-15a     | 66127.71    | 71018.04  | -0.09336416  | 1.80E-32  | -24.8 | 1563 | Negative |
| TCONS_00037642 | 29.0958 | 13.7318 | 1.083290164  | 0.00065227 | gga-miR-30e-5p  | 3635178.24  | 4124439.2 | -0.172605412 | 0         | -20.7 | 1992 | Negative |
| TCONS_00037642 | 29.0958 | 13.7318 | 1.083290164  | 0.00065227 | gga-miR-24-3p   | 18037.72    | 29569.61  | -0.703531782 | 0         | -30.6 | 1297 | Negative |
| TCONS_00037645 | 32.4087 | 12.8305 | 1.336803759  | 0.00065227 | gga-miR-19b-3p  | 61345.53    | 77980.92  | -0.336596508 | 0         | -21.7 | 1579 | Negative |
| TCONS_00037645 | 32.4087 | 12.8305 | 1.336803759  | 0.00065227 | gga-miR-193a-3p | 27315.69    | 30161.5   | -0.13341187  | 6.28E-28  | -27.8 | 672  | Negative |
| TCONS_00037648 | 18.7287 | 8.41953 | 1.153439157  | 0.00065227 | gga-miR-1a-3p   | 362868.23   | 438537.85 | -0.263689173 | 0         | -21.7 | 739  | Negative |
| TCONS_00037648 | 18.7287 | 8.41953 | 1.153439157  | 0.00065227 | gga-miR-130a-3p | 95161.71    | 100513.67 | -0.069372179 | 7.62E-26  | -24.2 | 442  | Negative |
| TCONS_00037693 | 26.4826 | 8.71658 | 1.603210668  | 0.00065227 | gga-miR-133c-3p | 15232674.15 | 15445951  | -0.010493064 | 1.69E-105 | -33.7 | 1907 | Negative |
| TCONS_00037693 | 26.4826 | 8.71658 | 1.603210668  | 0.00065227 | gga-miR-133b-3p | 15123175    | 15329186  | -0.009953553 | 3.00E-94  | -31.7 | 1908 | Negative |
| TCONS_00037693 | 26.4826 | 8.71658 | 1.603210668  | 0.00065227 | gga-miR-133a-3p | 16177058.89 | 16418962  | -0.011847135 | 4.63E-144 | -35.4 | 1906 | Negative |
| TCONS_00037697 | 30.3747 | 13.8805 | 1.129810623  | 0.00065227 | gga-miR-19b-3p  | 61345.53    | 77980.92  | -0.336596508 | 0         | -23.5 | 1179 | Negative |
| TCONS_00037697 | 30.3747 | 13.8805 | 1.129810623  | 0.00065227 | gga-miR-19a-3p  | 59718.13    | 75391.42  | -0.326664913 | 0         | -23.5 | 1179 | Negative |
| TCONS_00037697 | 30.3747 | 13.8805 | 1.129810623  | 0.00065227 | gga-miR-130c-3p | 95061.7     | 101023.35 | -0.078186239 | 1.45E-32  | -26.5 | 1380 | Negative |
| TCONS_00037697 | 30.3747 | 13.8805 | 1.129810623  | 0.00065227 | gga-miR-107-3p  | 57663.43    | 59591.36  | -0.037880075 | 1.61E-05  | -30.7 | 508  | Negative |
| TCONS_00037697 | 30.3747 | 13.8805 | 1.129810623  | 0.00065227 | gga-miR-130b-3p | 6614.13     | 10662.16  | -0.679309987 | 1.30E-203 | -23.7 | 1380 | Negative |
| TCONS_00037697 | 30.3747 | 13.8805 | 1.129810623  | 0.00065227 | gga-miR-130a-3p | 95161.71    | 100513.67 | -0.069372179 | 7.62E-26  | -22.8 | 1380 | Negative |
| TCONS_00038772 | 22.5777 | 6.32077 | 1.836726301  | 0.00065227 | gga-miR-24-3p   | 18037.72    | 29569.61  | -0.703531782 | 0         | -31   | 1744 | Negative |
| TCONS_00038772 | 22.5777 | 6.32077 | 1.836726301  | 0.00065227 | gga-miR-16-5p   | 56158.77    | 85642.55  | -0.599249972 | 0         | -28.2 | 3951 | Negative |
| TCONS_00038772 | 22.5777 | 6.32077 | 1.836726301  | 0.00065227 | gga-miR-15a     | 66127.71    | 71018.04  | -0.09336416  | 1.80E-32  | -26.3 | 3959 | Negative |
| TCONS_00038772 | 22.5777 | 6.32077 | 1.836726301  | 0.00065227 | gga-miR-130b-3p | 6614.13     | 10662.16  | -0.679309987 | 1.30E-203 | -27.2 | 758  | Negative |
| TCONS_00038772 | 22.5777 | 6.32077 | 1.836726301  | 0.00065227 | gga-miR-130a-3p | 95161.71    | 100513.67 | -0.069372179 | 7.62E-26  | -23.7 | 770  | Negative |
| TCONS_00039409 | 8.00685 | 31.8777 | -1.993240857 | 0.00065227 | gga-miR-218-5p  | 6523.22     | 3337.58   | 0.97634831   | 1.72E-233 | -24.1 | 936  | Negative |
| TCONS_00039409 | 8.00685 | 31.8777 | -1.993240857 | 0.00065227 | gga-let-7j-5p   | 1933522.85  | 1763522.9 | 0.142337939  | 0         | -23.5 | 1097 | Negative |
| TCONS_00039409 | 8.00685 | 31.8777 | -1.993240857 | 0.00065227 | gga-let-7g-5p   | 161712.18   | 156890.77 | 0.053234308  | 7.39E-25  | -23.4 | 1097 | Negative |
| TCONS_00039409 | 8.00685 | 31.8777 | -1.993240857 | 0.00065227 | gga-let-7f-5p   | 1810554.5   | 1701629.8 | 0.099080869  | 0         | -21.8 | 1097 | Negative |
| TCONS_00039409 | 8.00685 | 31.8777 | -1.993240857 | 0.00065227 | gga-miR-199-5p  | 157089.1    | 112030.78 | 0.497254361  | 0         | -26.1 | 40   | Negative |
| TCONS_00040094 | 45.4284 | 16.4646 | 1.464227031  | 0.00065227 | gga-miR-1a-3p   | 362868.23   | 438537.85 | -0.263689173 | 0         | -23   | 1835 | Negative |
| TCONS_00040094 | 45.4284 | 16.4646 | 1.464227031  | 0.00065227 | gga-miR-181b-5p | 104412.41   | 123095.75 | -0.227921315 | 0         | -26.8 | 2282 | Negative |
| TCONS_00040147 | 29.2494 | 146.362 | -2.323062099 | 0.00065227 | gga-miR-148a-3p | 1311848.77  | 1183894.4 | 0.157627517  | 0         | -27.2 | 4656 | Negative |
| TCONS_00040224 | 23.8611 | 7.77219 | 1.618267478  | 0.00065227 | gga-miR-24-3p   | 18037.72    | 29569.61  | -0.703531782 | 0         | -30.2 | 1788 | Negative |
| TCONS_00040224 | 23.8611 | 7.77219 | 1.618267478  | 0.00065227 | gga-miR-16c-5p  | 11005.37    | 13366.75  | -0.270874638 | 9.68E-48  | -26.6 | 2378 | Negative |
| TCONS_00040224 | 23.8611 | 7.77219 | 1.618267478  | 0.00065227 | gga-miR-15c-5p  | 78633.19    | 83587.39  | -0.078580488 | 2.09E-27  | -26.2 | 2372 | Negative |
| TCONS_00040224 | 23.8611 | 7.77219 | 1.618267478  | 0.00065227 | gga-miR-15b-5p  | 52240.3     | 54724.75  | -0.057463834 | 2.08E-10  | -27.9 | 2382 | Negative |
| TCONS_00040224 | 23.8611 | 7.77219 | 1.618267478  | 0.00065227 | gga-miR-16-5p   | 56158.77    | 85642.55  | -0.599249972 | 0         | -24.8 | 2376 | Negative |
| TCONS_00040485 | 40.2425 | 11.7594 | 1.774905482  | 0.00065227 | gga-miR-15b-5p  | 52240.3     | 54724.75  | -0.057463834 | 2.08E-10  | -24.5 | 825  | Negative |
| TCONS_00045553 | 2.0953  | 16.8451 | -3.007100268 | 0.00065227 | gga-miR-211     | 4336.69     | 2762.13   | 0.66037954   | 4.14E-80  | -24.6 | 396  | Negative |
| TCONS_00045553 | 2.0953  | 16.8451 | -3.007100268 | 0.00065227 | gga-miR-204     | 4336.69     | 2762.13   | 0.66037954   | 4.14E-80  | -24.6 | 396  | Negative |
| TCONS_00046750 | 5.92657 | 20.679  | -1.802897129 | 0.00065227 | gga-let-7j-5p   | 1933522.85  | 1763522.9 | 0.142337939  | 0         | -25.5 | 1218 | Negative |
| TCONS_00046750 | 5.92657 | 20.679  | -1.802897129 | 0.00065227 | gga-let-7f-5p   | 1810554.5   | 1701629.8 | 0.099080869  | 0         | -25.5 | 1218 | Negative |
| TCONS_00046750 | 5.92657 | 20.679  | -1.802897129 | 0.00065227 | gga-let-7c-5p   | 1103087.6   | 913460.21 | 0.281700016  | 0         | -24.2 | 1218 | Negative |
| TCONS_00046750 | 5.92657 | 20.679  | -1.802897129 | 0.00065227 | gga-let-7g-5p   | 161712.18   | 156890.77 | 0.053234308  | 7.39E-25  | -26.6 | 1219 | Negative |
| TCONS_00047466 | 13.0703 | 26.8866 | -1.040595072 | 0.00065227 | gga-miR-218-5p  | 6523.22     | 3337.58   | 0.97634831   | 1.72E-233 | -22.5 | 1990 | Negative |
| TCONS_00047466 | 13.0703 | 26.8866 | -1.040595072 | 0.00065227 | gga-let-7b-5p   | 372600.78   | 329030.81 | 0.188974455  | 0         | -26.2 | 60   | Negative |
| TCONS_00047731 | 15.7687 | 33.5939 | -1.091135565 | 0.00065227 | gga-miR-205a    | 4900.37     | 2137.36   | 1.206627201  | 2.97E-247 | -22.8 | 1369 | Negative |
| TCONS_00047731 | 15.7687 | 33.5939 | -1.091135565 | 0.00065227 | gga-miR-204     | 4336.69     | 2762.13   | 0.66037954   | 4.14E-80  | -30   | 1041 | Negative |
| TCONS_00047731 | 15.7687 | 33.5939 | -1.091135565 | 0.00065227 | gga-miR-211     | 4336.69     | 2762.13   | 0.66037954   | 4.14E-80  | -30   | 1041 | Negative |
| TCONS_00051479 | 16.6008 | 7.76324 | 1.096521973  | 0.00065227 | gga-miR-30d-5p  | 3872505.2   | 4800290.2 | -0.300288016 | 0         | -25.9 | 4161 | Negative |
| TCONS_00051479 | 16.6008 | 7.76324 | 1.096521973  | 0.00065227 | gga-miR-190a-5p | 4073.03     | 4858.39   | -0.244809421 | 4.22E-15  | -24.5 | 4561 | Negative |

|                |         |         |             |            |                 |           |           |              |           |       |      |          |
|----------------|---------|---------|-------------|------------|-----------------|-----------|-----------|--------------|-----------|-------|------|----------|
| TCONS_00051479 | 16.6008 | 7.76324 | 1.096521973 | 0.00065227 | gga-miR-15c-5p  | 78633.19  | 83587.39  | -0.078580488 | 2.09E-27  | -26.7 | 2606 | Negative |
| TCONS_00051479 | 16.6008 | 7.76324 | 1.096521973 | 0.00065227 | gga-miR-15b-5p  | 52240.3   | 54724.75  | -0.057463834 | 2.08E-10  | -28.7 | 2606 | Negative |
| TCONS_00051479 | 16.6008 | 7.76324 | 1.096521973 | 0.00065227 | gga-miR-15a     | 66127.71  | 71018.04  | -0.09336416  | 1.80E-32  | -26.6 | 2607 | Negative |
| TCONS_00052512 | 19.1652 | 7.78908 | 1.298964213 | 0.00065227 | gga-miR-16-5p   | 56158.77  | 85642.55  | -0.599249972 | 0         | -22.3 | 2296 | Negative |
| TCONS_00052512 | 19.1652 | 7.78908 | 1.298964213 | 0.00065227 | gga-miR-15c-5p  | 78633.19  | 83587.39  | -0.078580488 | 2.09E-27  | -24   | 2295 | Negative |
| TCONS_00052512 | 19.1652 | 7.78908 | 1.298964213 | 0.00065227 | gga-miR-15a     | 66127.71  | 71018.04  | -0.09336416  | 1.80E-32  | -23.3 | 2295 | Negative |
| TCONS_00052512 | 19.1652 | 7.78908 | 1.298964213 | 0.00065227 | gga-miR-130c-3p | 95061.7   | 101023.35 | -0.078186239 | 1.45E-32  | -24.7 | 2081 | Negative |
| TCONS_00052512 | 19.1652 | 7.78908 | 1.298964213 | 0.00065227 | gga-miR-130b-3p | 6614.13   | 10662.16  | -0.679309987 | 1.30E-203 | -25.8 | 2090 | Negative |
| TCONS_00052512 | 19.1652 | 7.78908 | 1.298964213 | 0.00065227 | gga-miR-130a-3p | 95161.71  | 100513.67 | -0.069372179 | 7.62E-26  | -25.8 | 2089 | Negative |
| TCONS_00052512 | 19.1652 | 7.78908 | 1.298964213 | 0.00065227 | gga-miR-15b-5p  | 52240.3   | 54724.75  | -0.057463834 | 2.08E-10  | -25.3 | 2298 | Negative |
| TCONS_00053510 | 43.6012 | 12.5854 | 1.792616771 | 0.00065227 | gga-miR-15c-5p  | 78633.19  | 83587.39  | -0.078580488 | 2.09E-27  | -22.7 | 1394 | Negative |
| TCONS_00053513 | 36.5029 | 14.0367 | 1.378807284 | 0.00065227 | gga-miR-140-5p  | 3682.1    | 4258.29   | -0.200178953 | 1.83E-09  | -22.5 | 1928 | Negative |
| TCONS_00053513 | 36.5029 | 14.0367 | 1.378807284 | 0.00065227 | gga-miR-130c-3p | 95061.7   | 101023.35 | -0.078186239 | 1.45E-32  | -27   | 192  | Negative |
| TCONS_00053520 | 37.7327 | 14.1376 | 1.416278108 | 0.00065227 | gga-miR-20a-5p  | 17755.88  | 20913.29  | -0.226556733 | 6.19E-53  | -24.1 | 955  | Negative |
| TCONS_00054104 | 80.4489 | 4.79283 | 4.069123021 | 0.00065227 | gga-miR-107-3p  | 57663.43  | 59591.36  | -0.037880075 | 1.61E-05  | -30   | 494  | Negative |
| TCONS_00054193 | 1407.73 | 687.927 | 1.033043269 | 0.00065227 | gga-miR-454-3p  | 26265.61  | 42837.71  | -0.696139826 | 0         | -25.9 | 160  | Negative |
| TCONS_00054193 | 1407.73 | 687.927 | 1.033043269 | 0.00065227 | gga-miR-15c-5p  | 78633.19  | 83587.39  | -0.078580488 | 2.09E-27  | -22.6 | 96   | Negative |
| TCONS_00054193 | 1407.73 | 687.927 | 1.033043269 | 0.00065227 | gga-miR-15a     | 66127.71  | 71018.04  | -0.09336416  | 1.80E-32  | -21.9 | 96   | Negative |
| TCONS_00054193 | 1407.73 | 687.927 | 1.033043269 | 0.00065227 | gga-miR-130b-3p | 6614.13   | 10662.16  | -0.679309987 | 1.30E-203 | -20.5 | 184  | Negative |
| TCONS_00054193 | 1407.73 | 687.927 | 1.033043269 | 0.00065227 | gga-miR-130a-3p | 95161.71  | 100513.67 | -0.069372179 | 7.62E-26  | -20.5 | 184  | Negative |
| TCONS_00054544 | 36.7898 | 15.8322 | 1.216444091 | 0.00065227 | gga-miR-15a     | 66127.71  | 71018.04  | -0.09336416  | 1.80E-32  | -22.4 | 909  | Negative |
| TCONS_00055448 | 12.7638 | 3.73711 | 1.772062973 | 0.00065227 | gga-miR-193a-3p | 27315.69  | 30161.5   | -0.13341187  | 6.28E-28  | -32.9 | 1271 | Negative |
| TCONS_00055448 | 12.7638 | 3.73711 | 1.772062973 | 0.00065227 | gga-miR-15c-5p  | 78633.19  | 83587.39  | -0.078580488 | 2.09E-27  | -26.7 | 673  | Negative |
| TCONS_00055448 | 12.7638 | 3.73711 | 1.772062973 | 0.00065227 | gga-miR-15b-5p  | 52240.3   | 54724.75  | -0.057463834 | 2.08E-10  | -28.6 | 673  | Negative |
| TCONS_00055448 | 12.7638 | 3.73711 | 1.772062973 | 0.00065227 | gga-miR-15a     | 66127.71  | 71018.04  | -0.09336416  | 1.80E-32  | -27.1 | 673  | Negative |
| TCONS_00055448 | 12.7638 | 3.73711 | 1.772062973 | 0.00065227 | gga-miR-20b-5p  | 6200.47   | 7875.37   | -0.335403686 | 2.62E-42  | -25.6 | 2047 | Negative |
| TCONS_00055448 | 12.7638 | 3.73711 | 1.772062973 | 0.00065227 | gga-miR-17-5p   | 23906.35  | 28303.64  | -0.234027283 | 1.05E-75  | -28.2 | 2046 | Negative |
| TCONS_00055766 | 30.4794 | 10.7695 | 1.500883232 | 0.00065227 | gga-miR-16c-5p  | 11005.37  | 13366.75  | -0.270874638 | 9.68E-48  | -28   | 717  | Negative |
| TCONS_00055766 | 30.4794 | 10.7695 | 1.500883232 | 0.00065227 | gga-miR-16-5p   | 56158.77  | 85642.55  | -0.599249972 | 0         | -25.7 | 717  | Negative |
| TCONS_00055766 | 30.4794 | 10.7695 | 1.500883232 | 0.00065227 | gga-miR-15c-5p  | 78633.19  | 83587.39  | -0.078580488 | 2.09E-27  | -27.4 | 704  | Negative |
| TCONS_00055766 | 30.4794 | 10.7695 | 1.500883232 | 0.00065227 | gga-miR-15b-5p  | 52240.3   | 54724.75  | -0.057463834 | 2.08E-10  | -29.2 | 704  | Negative |
| TCONS_00055766 | 30.4794 | 10.7695 | 1.500883232 | 0.00065227 | gga-miR-15a     | 66127.71  | 71018.04  | -0.09336416  | 1.80E-32  | -25.6 | 714  | Negative |
| TCONS_00055769 | 32.5242 | 12.6609 | 1.361133609 | 0.00065227 | gga-miR-16c-5p  | 11005.37  | 13366.75  | -0.270874638 | 9.68E-48  | -26.9 | 443  | Negative |
| TCONS_00055769 | 32.5242 | 12.6609 | 1.361133609 | 0.00065227 | gga-miR-107-3p  | 57663.43  | 59591.36  | -0.037880075 | 1.61E-05  | -30.8 | 430  | Negative |
| TCONS_00055769 | 32.5242 | 12.6609 | 1.361133609 | 0.00065227 | gga-miR-34a-5p  | 3063.87   | 4134.98   | -0.422958824 | 1.67E-34  | -29.4 | 1107 | Negative |
| TCONS_00055773 | 42.7021 | 16.171  | 1.400898124 | 0.00065227 | gga-miR-16-5p   | 56158.77  | 85642.55  | -0.599249972 | 0         | -25.4 | 706  | Negative |
| TCONS_00055773 | 42.7021 | 16.171  | 1.400898124 | 0.00065227 | gga-miR-15b-5p  | 52240.3   | 54724.75  | -0.057463834 | 2.08E-10  | -30.2 | 719  | Negative |
| TCONS_00055774 | 25.8374 | 12.5061 | 1.046828942 | 0.00065227 | gga-miR-107-3p  | 57663.43  | 59591.36  | -0.037880075 | 1.61E-05  | -29.7 | 2198 | Negative |
| TCONS_00055778 | 30.3276 | 12.0447 | 1.332232873 | 0.00065227 | gga-miR-20a-5p  | 17755.88  | 20913.29  | -0.226556733 | 6.19E-53  | -26.4 | 2363 | Negative |
| TCONS_00055778 | 30.3276 | 12.0447 | 1.332232873 | 0.00065227 | gga-miR-106-5p  | 15701.18  | 19647.31  | -0.313892371 | 1.17E-91  | -27.2 | 2363 | Negative |
| TCONS_00056423 | 31.1614 | 15.2161 | 1.034161419 | 0.00065227 | gga-miR-24-3p   | 18037.72  | 29569.61  | -0.703531782 | 0         | -30.1 | 2373 | Negative |
| TCONS_00056423 | 31.1614 | 15.2161 | 1.034161419 | 0.00065227 | gga-miR-16c-5p  | 11005.37  | 13366.75  | -0.270874638 | 9.68E-48  | -26.4 | 1669 | Negative |
| TCONS_00056423 | 31.1614 | 15.2161 | 1.034161419 | 0.00065227 | gga-miR-15a     | 66127.71  | 71018.04  | -0.09336416  | 1.80E-32  | -24.1 | 1672 | Negative |
| TCONS_00056423 | 31.1614 | 15.2161 | 1.034161419 | 0.00065227 | gga-miR-107-3p  | 57663.43  | 59591.36  | -0.037880075 | 1.61E-05  | -32.6 | 2292 | Negative |
| TCONS_00056642 | 48.9336 | 17.079  | 1.518601919 | 0.00065227 | gga-miR-26a-5p  | 5512392.3 | 5684205.5 | -0.034713704 | 0         | -22.2 | 1143 | Negative |
| TCONS_00056652 | 26.1065 | 10.7377 | 1.281724051 | 0.00065227 | gga-miR-16c-5p  | 11005.37  | 13366.75  | -0.270874638 | 9.68E-48  | -25.2 | 2115 | Negative |
| TCONS_00056854 | 15.7964 | 4.96961 | 1.668391263 | 0.00065227 | gga-miR-16c-5p  | 11005.37  | 13366.75  | -0.270874638 | 9.68E-48  | -24   | 411  | Negative |
| TCONS_00056854 | 15.7964 | 4.96961 | 1.668391263 | 0.00065227 | gga-miR-16-5p   | 56158.77  | 85642.55  | -0.599249972 | 0         | -25.3 | 405  | Negative |
| TCONS_00056854 | 15.7964 | 4.96961 | 1.668391263 | 0.00065227 | gga-miR-20b-5p  | 6200.47   | 7875.37   | -0.335403686 | 2.62E-42  | -27.1 | 101  | Negative |
| TCONS_00057327 | 35.477  | 11.7388 | 1.595599082 | 0.00065227 | gga-miR-130c-3p | 95061.7   | 101023.35 | -0.078186239 | 1.45E-32  | -24.4 | 1210 | Negative |
| TCONS_00057327 | 35.477  | 11.7388 | 1.595599082 | 0.00065227 | gga-miR-130b-3p | 6614.13   | 10662.16  | -0.679309987 | 1.30E-203 | -21.8 | 1225 | Negative |
| TCONS_00057327 | 35.477  | 11.7388 | 1.595599082 | 0.00065227 | gga-miR-130a-3p | 95161.71  | 100513.67 | -0.069372179 | 7.62E-26  | -21.8 | 1225 | Negative |
| TCONS_00057327 | 35.477  | 11.7388 | 1.595599082 | 0.00065227 | gga-miR-19b-3p  | 61345.53  | 77980.92  | -0.336596508 | 0         | -20.8 | 1207 | Negative |
| TCONS_00058406 | 22.1576 | 5.33184 | 2.055096231 | 0.00065227 | gga-miR-16c-5p  | 11005.37  | 13366.75  | -0.270874638 | 9.68E-48  | -23.6 | 1215 | Negative |

|                |         |         |             |            |                 |             |           |              |           |       |      |          |
|----------------|---------|---------|-------------|------------|-----------------|-------------|-----------|--------------|-----------|-------|------|----------|
| TCONS_00058537 | 29.2805 | 13.2872 | 1.139903071 | 0.00065227 | gga-miR-34a-5p  | 3063.87     | 4134.98   | -0.422958824 | 1.67E-34  | -33.6 | 903  | Negative |
| TCONS_00058537 | 29.2805 | 13.2872 | 1.139903071 | 0.00065227 | gga-miR-206     | 26129.24    | 36261.21  | -0.463195462 | 0         | -26   | 210  | Negative |
| TCONS_00058565 | 32.8076 | 10.4135 | 1.655575016 | 0.00065227 | gga-miR-34a-5p  | 3063.87     | 4134.98   | -0.422958824 | 1.67E-34  | -30   | 1069 | Negative |
| TCONS_00058565 | 32.8076 | 10.4135 | 1.655575016 | 0.00065227 | gga-miR-15c-5p  | 78633.19    | 83587.39  | -0.078580488 | 2.09E-27  | -32.5 | 772  | Negative |
| TCONS_00058565 | 32.8076 | 10.4135 | 1.655575016 | 0.00065227 | gga-miR-15b-5p  | 52240.3     | 54724.75  | -0.057463834 | 2.08E-10  | -34.1 | 769  | Negative |
| TCONS_00058565 | 32.8076 | 10.4135 | 1.655575016 | 0.00065227 | gga-miR-15a     | 66127.71    | 71018.04  | -0.09336416  | 1.80E-32  | -28   | 772  | Negative |
| TCONS_00059257 | 26.1176 | 10.0275 | 1.381060365 | 0.00065227 | gga-miR-16-5p   | 56158.77    | 85642.55  | -0.599249972 | 0         | -25.9 | 3637 | Negative |
| TCONS_00059257 | 26.1176 | 10.0275 | 1.381060365 | 0.00065227 | gga-miR-15c-5p  | 78633.19    | 83587.39  | -0.078580488 | 2.09E-27  | -25.9 | 3641 | Negative |
| TCONS_00059257 | 26.1176 | 10.0275 | 1.381060365 | 0.00065227 | gga-miR-15b-5p  | 52240.3     | 54724.75  | -0.057463834 | 2.08E-10  | -27.8 | 3641 | Negative |
| TCONS_00059257 | 26.1176 | 10.0275 | 1.381060365 | 0.00065227 | gga-miR-15a     | 66127.71    | 71018.04  | -0.09336416  | 1.80E-32  | -24.1 | 3641 | Negative |
| TCONS_00059257 | 26.1176 | 10.0275 | 1.381060365 | 0.00065227 | gga-miR-140-5p  | 3682.1      | 4258.29   | -0.200178953 | 1.83E-09  | -24.4 | 2712 | Negative |
| TCONS_00059257 | 26.1176 | 10.0275 | 1.381060365 | 0.00065227 | gga-miR-133c-3p | 15232674.15 | 15445951  | -0.010493064 | 1.69E-105 | -33.4 | 2700 | Negative |
| TCONS_00059257 | 26.1176 | 10.0275 | 1.381060365 | 0.00065227 | gga-miR-133a-3p | 16177058.89 | 16418962  | -0.011847135 | 4.63E-144 | -32.9 | 2700 | Negative |
| TCONS_00059257 | 26.1176 | 10.0275 | 1.381060365 | 0.00065227 | gga-miR-16c-5p  | 11005.37    | 13366.75  | -0.270874638 | 9.68E-48  | -28.1 | 3639 | Negative |
| TCONS_00059278 | 16.1346 | 3.20235 | 2.332954911 | 0.00065227 | gga-miR-34a-5p  | 3063.87     | 4134.98   | -0.422958824 | 1.67E-34  | -36.8 | 1107 | Negative |
| TCONS_00059312 | 1208.07 | 220.41  | 2.454442467 | 0.00065227 | gga-miR-128-3p  | 99089.28    | 110172.91 | -0.143402193 | 1.43E-113 | -27.3 | 719  | Negative |
| TCONS_00059418 | 39.5438 | 13.6139 | 1.538371097 | 0.00065227 | gga-miR-107-3p  | 57663.43    | 59591.36  | -0.037880075 | 1.61E-05  | -30.1 | 1321 | Negative |
| TCONS_00059418 | 39.5438 | 13.6139 | 1.538371097 | 0.00065227 | gga-miR-183-5p  | 1050.08     | 1257.76   | -0.250790974 | 6.63E-05  | -26.6 | 1215 | Negative |
| TCONS_00059565 | 26.1878 | 10.4916 | 1.319660156 | 0.00065227 | gga-miR-16c-5p  | 11005.37    | 13366.75  | -0.270874638 | 9.68E-48  | -23.6 | 1563 | Negative |
| TCONS_00059565 | 26.1878 | 10.4916 | 1.319660156 | 0.00065227 | gga-miR-128-3p  | 99089.28    | 110172.91 | -0.143402193 | 1.43E-113 | -23.4 | 268  | Negative |
| TCONS_00059983 | 25.6665 | 0       | 5           | 0.00065227 | gga-miR-107-3p  | 57663.43    | 59591.36  | -0.037880075 | 1.61E-05  | -22.2 | 340  | Negative |
| TCONS_00059983 | 25.6665 | 0       | 5           | 0.00065227 | gga-let-7i      | 271147.69   | 318697.47 | -0.223542244 | 0         | -23.2 | 328  | Negative |
| TCONS_00061016 | 22.8146 | 3.65607 | 2.641591762 | 0.00065227 | gga-miR-24-3p   | 18037.72    | 29569.61  | -0.703531782 | 0         | -31   | 1417 | Negative |
| TCONS_00061016 | 22.8146 | 3.65607 | 2.641591762 | 0.00065227 | gga-miR-128-3p  | 99089.28    | 110172.91 | -0.143402193 | 1.43E-113 | -27.2 | 2144 | Negative |
| TCONS_00061513 | 61.3744 | 29.3988 | 1.061879747 | 0.00065227 | gga-miR-34a-5p  | 3063.87     | 4134.98   | -0.422958824 | 1.67E-34  | -31.6 | 1818 | Negative |
| TCONS_00061933 | 37.5793 | 16.1068 | 1.222268297 | 0.00065227 | gga-miR-15c-5p  | 78633.19    | 83587.39  | -0.078580488 | 2.09E-27  | -27.4 | 4219 | Negative |
| TCONS_00061933 | 37.5793 | 16.1068 | 1.222268297 | 0.00065227 | gga-miR-15b-5p  | 52240.3     | 54724.75  | -0.057463834 | 2.08E-10  | -29.2 | 4219 | Negative |
| TCONS_00061933 | 37.5793 | 16.1068 | 1.222268297 | 0.00065227 | gga-miR-133b-3p | 15123175    | 15329186  | -0.009953553 | 3.00E-94  | -33.4 | 776  | Negative |
| TCONS_00061933 | 37.5793 | 16.1068 | 1.222268297 | 0.00065227 | gga-miR-133a-3p | 16177058.89 | 16418962  | -0.011847135 | 4.63E-144 | -33.4 | 776  | Negative |
| TCONS_00062363 | 82.8033 | 32.0963 | 1.367281269 | 0.00065227 | gga-miR-16-5p   | 56158.77    | 85642.55  | -0.599249972 | 0         | -25.4 | 1815 | Negative |
| TCONS_00062363 | 82.8033 | 32.0963 | 1.367281269 | 0.00065227 | gga-miR-15c-5p  | 78633.19    | 83587.39  | -0.078580488 | 2.09E-27  | -27.8 | 1833 | Negative |
| TCONS_00062363 | 82.8033 | 32.0963 | 1.367281269 | 0.00065227 | gga-miR-15b-5p  | 52240.3     | 54724.75  | -0.057463834 | 2.08E-10  | -29.3 | 1833 | Negative |
| TCONS_00062363 | 82.8033 | 32.0963 | 1.367281269 | 0.00065227 | gga-miR-15a     | 66127.71    | 71018.04  | -0.09336416  | 1.80E-32  | -27.1 | 1833 | Negative |
| TCONS_00063889 | 24.0259 | 10.6354 | 1.17571618  | 0.00065227 | gga-miR-24-3p   | 18037.72    | 29569.61  | -0.703531782 | 0         | -34.4 | 1811 | Negative |
| TCONS_00063889 | 24.0259 | 10.6354 | 1.17571618  | 0.00065227 | gga-miR-222a    | 31511.46    | 36959.96  | -0.220520153 | 5.73E-88  | -31.4 | 1870 | Negative |
| TCONS_00063889 | 24.0259 | 10.6354 | 1.17571618  | 0.00065227 | gga-miR-133c-3p | 15232674.15 | 15445951  | -0.010493064 | 1.69E-105 | -27.5 | 1893 | Negative |
| TCONS_00063889 | 24.0259 | 10.6354 | 1.17571618  | 0.00065227 | gga-miR-133b-3p | 15123175    | 15329186  | -0.009953553 | 3.00E-94  | -25.5 | 1894 | Negative |
| TCONS_00063889 | 24.0259 | 10.6354 | 1.17571618  | 0.00065227 | gga-miR-133a-3p | 16177058.89 | 16418962  | -0.011847135 | 4.63E-144 | -27.6 | 1862 | Negative |
| TCONS_00064325 | 92.1425 | 36.3473 | 1.342018542 | 0.00065227 | gga-miR-128-3p  | 99089.28    | 110172.91 | -0.143402193 | 1.43E-113 | -22.1 | 3022 | Negative |
| TCONS_00064325 | 92.1425 | 36.3473 | 1.342018542 | 0.00065227 | gga-miR-10a-5p  | 2368.36     | 2753.91   | -0.208026576 | 6.49E-07  | -24.3 | 2918 | Negative |
| TCONS_00064325 | 92.1425 | 36.3473 | 1.342018542 | 0.00065227 | gga-miR-24-3p   | 18037.72    | 29569.61  | -0.703531782 | 0         | -31   | 2996 | Negative |
| TCONS_00066041 | 20.7313 | 10.098  | 1.037741004 | 0.00065227 | gga-miR-128-3p  | 99089.28    | 110172.91 | -0.143402193 | 1.43E-113 | -23.6 | 417  | Negative |
| TCONS_00066041 | 20.7313 | 10.098  | 1.037741004 | 0.00065227 | gga-miR-10a-5p  | 2368.36     | 2753.91   | -0.208026576 | 6.49E-07  | -24.4 | 2799 | Negative |
| TCONS_00066041 | 20.7313 | 10.098  | 1.037741004 | 0.00065227 | gga-miR-455-5p  | 2386.54     | 2712.81   | -0.175301048 | 3.23E-05  | -26.6 | 2135 | Negative |
| TCONS_00066041 | 20.7313 | 10.098  | 1.037741004 | 0.00065227 | gga-let-7i      | 271147.69   | 318697.47 | -0.223542244 | 0         | -28   | 617  | Negative |
| TCONS_00066080 | 24.7522 | 9.75945 | 1.342685008 | 0.00065227 | gga-miR-30e-5p  | 3635178.24  | 4124439.2 | -0.172605412 | 0         | -23.5 | 1907 | Negative |
| TCONS_00066080 | 24.7522 | 9.75945 | 1.342685008 | 0.00065227 | gga-miR-30a-5p  | 5516178.95  | 6501640.5 | -0.227568083 | 0         | -25.6 | 1907 | Negative |
| TCONS_00066080 | 24.7522 | 9.75945 | 1.342685008 | 0.00065227 | gga-miR-19a-3p  | 59718.13    | 75391.42  | -0.326664913 | 0         | -22.9 | 1057 | Negative |
| TCONS_00066855 | 39.5926 | 17.6038 | 1.169343924 | 0.00065227 | gga-miR-20b-5p  | 6200.47     | 7875.37   | -0.335403686 | 2.62E-42  | -33.8 | 2863 | Negative |
| TCONS_00067025 | 217.549 | 100.556 | 1.113341218 | 0.00065227 | gga-miR-16c-5p  | 11005.37    | 13366.75  | -0.270874638 | 9.68E-48  | -24.7 | 2644 | Negative |
| TCONS_00067025 | 217.549 | 100.556 | 1.113341218 | 0.00065227 | gga-miR-16-5p   | 56158.77    | 85642.55  | -0.599249972 | 0         | -22.7 | 2635 | Negative |
| TCONS_00067025 | 217.549 | 100.556 | 1.113341218 | 0.00065227 | gga-miR-15b-5p  | 52240.3     | 54724.75  | -0.057463834 | 2.08E-10  | -30.2 | 2638 | Negative |
| TCONS_00067025 | 217.549 | 100.556 | 1.113341218 | 0.00065227 | gga-miR-15a     | 66127.71    | 71018.04  | -0.09336416  | 1.80E-32  | -23.2 | 2638 | Negative |
| TCONS_00067025 | 217.549 | 100.556 | 1.113341218 | 0.00065227 | gga-miR-15c-5p  | 78633.19    | 83587.39  | -0.078580488 | 2.09E-27  | -28.3 | 2638 | Negative |

|                |         |         |              |            |                 |            |           |              |           |       |      |          |
|----------------|---------|---------|--------------|------------|-----------------|------------|-----------|--------------|-----------|-------|------|----------|
| TCONS_00068724 | 22.9118 | 5.79068 | 1.984286125  | 0.00065227 | gga-miR-181b-5p | 104412.41  | 123095.75 | -0.227921315 | 0         | -24.5 | 906  | Negative |
| TCONS_00071229 | 14.8508 | 31.2254 | -1.072179403 | 0.00065227 | gga-miR-29a-3p  | 11632.69   | 9782.55   | 0.25946871   | 9.25E-39  | -20.9 | 1007 | Negative |
| TCONS_00071229 | 14.8508 | 31.2254 | -1.072179403 | 0.00065227 | gga-miR-218-5p  | 6523.22    | 3337.58   | 0.97634831   | 1.72E-233 | -23.8 | 1321 | Negative |
| TCONS_00071234 | 10.5643 | 23.6336 | -1.161642229 | 0.00065227 | gga-miR-22-3p   | 6060606.31 | 5856904.5 | 0.058890194  | 0         | -26.9 | 1219 | Negative |
| TCONS_00071234 | 10.5643 | 23.6336 | -1.161642229 | 0.00065227 | gga-miR-142-5p  | 108462.71  | 54058.88  | 1.014162038  | 0         | -26   | 873  | Negative |
| TCONS_00071899 | 31.5742 | 15.2997 | 1.045242816  | 0.00065227 | gga-miR-16-5p   | 56158.77   | 85642.55  | -0.599249972 | 0         | -21.7 | 894  | Negative |
| TCONS_00071899 | 31.5742 | 15.2997 | 1.045242816  | 0.00065227 | gga-miR-15a     | 66127.71   | 71018.04  | -0.09336416  | 1.80E-32  | -22.6 | 892  | Negative |
| TCONS_00071899 | 31.5742 | 15.2997 | 1.045242816  | 0.00065227 | gga-miR-15c-5p  | 78633.19   | 83587.39  | -0.078580488 | 2.09E-27  | -23   | 888  | Negative |
| TCONS_00071902 | 27.5107 | 12.8805 | 1.094804251  | 0.00065227 | gga-miR-16c-5p  | 11005.37   | 13366.75  | -0.270874638 | 9.68E-48  | -26.5 | 1321 | Negative |
| TCONS_00071902 | 27.5107 | 12.8805 | 1.094804251  | 0.00065227 | gga-miR-15c-5p  | 78633.19   | 83587.39  | -0.078580488 | 2.09E-27  | -26   | 1338 | Negative |
| TCONS_00071902 | 27.5107 | 12.8805 | 1.094804251  | 0.00065227 | gga-miR-15a     | 66127.71   | 71018.04  | -0.09336416  | 1.80E-32  | -25.6 | 1339 | Negative |
| TCONS_00071902 | 27.5107 | 12.8805 | 1.094804251  | 0.00065227 | gga-miR-130c-3p | 95061.7    | 101023.35 | -0.078186239 | 1.45E-32  | -23.7 | 1043 | Negative |
| TCONS_00071902 | 27.5107 | 12.8805 | 1.094804251  | 0.00065227 | gga-miR-16-5p   | 56158.77   | 85642.55  | -0.599249972 | 0         | -25   | 1336 | Negative |
| TCONS_00073069 | 9.65156 | 22.1572 | -1.198941528 | 0.00065227 | gga-miR-218-5p  | 6523.22    | 3337.58   | 0.97634831   | 1.72E-233 | -22.4 | 544  | Negative |
| TCONS_00073069 | 9.65156 | 22.1572 | -1.198941528 | 0.00065227 | gga-miR-1729-5p | 1368.28    | 1150.89   | 0.259179981  | 1.59E-05  | -28.1 | 3363 | Negative |
| TCONS_00073874 | 27.755  | 12.5188 | 1.148651415  | 0.00065227 | gga-miR-19b-3p  | 61345.53   | 77980.92  | -0.336596508 | 0         | -27.4 | 2740 | Negative |
| TCONS_00073874 | 27.755  | 12.5188 | 1.148651415  | 0.00065227 | gga-miR-19a-3p  | 59718.13   | 75391.42  | -0.326664913 | 0         | -25.1 | 2740 | Negative |
| TCONS_00073874 | 27.755  | 12.5188 | 1.148651415  | 0.00065227 | gga-miR-16c-5p  | 11005.37   | 13366.75  | -0.270874638 | 9.68E-48  | -26.1 | 1556 | Negative |
| TCONS_00073874 | 27.755  | 12.5188 | 1.148651415  | 0.00065227 | gga-miR-16-5p   | 56158.77   | 85642.55  | -0.599249972 | 0         | -24.7 | 1569 | Negative |
| TCONS_00073874 | 27.755  | 12.5188 | 1.148651415  | 0.00065227 | gga-miR-24-3p   | 18037.72   | 29569.61  | -0.703531782 | 0         | -29.6 | 1585 | Negative |
| TCONS_00074529 | 52.536  | 7.84763 | 2.742977432  | 0.00065227 | gga-miR-34a-5p  | 3063.87    | 4134.98   | -0.422958824 | 1.67E-34  | -30   | 1212 | Negative |
| TCONS_00074529 | 52.536  | 7.84763 | 2.742977432  | 0.00065227 | gga-miR-196-5p  | 9318.88    | 11221.16  | -0.258426903 | 6.42E-37  | -22.7 | 512  | Negative |
| TCONS_00074529 | 52.536  | 7.84763 | 2.742977432  | 0.00065227 | gga-miR-16-5p   | 56158.77   | 85642.55  | -0.599249972 | 0         | -24.2 | 49   | Negative |
| TCONS_00074529 | 52.536  | 7.84763 | 2.742977432  | 0.00065227 | gga-miR-15c-5p  | 78633.19   | 83587.39  | -0.078580488 | 2.09E-27  | -26.4 | 35   | Negative |
| TCONS_00074529 | 52.536  | 7.84763 | 2.742977432  | 0.00065227 | gga-miR-15a     | 66127.71   | 71018.04  | -0.09336416  | 1.80E-32  | -24.2 | 1264 | Negative |
| TCONS_00074529 | 52.536  | 7.84763 | 2.742977432  | 0.00065227 | gga-miR-16c-5p  | 11005.37   | 13366.75  | -0.270874638 | 9.68E-48  | -25.1 | 47   | Negative |
| TCONS_00074529 | 52.536  | 7.84763 | 2.742977432  | 0.00065227 | gga-miR-15b-5p  | 52240.3    | 54724.75  | -0.057463834 | 2.08E-10  | -28.2 | 35   | Negative |
| TCONS_00075876 | 0       | 33.9589 | -5           | 0.00065227 | gga-miR-489-3p  | 6582.31    | 3822.59   | 0.793609947  | 3.09E-166 | -21.8 | 19   | Negative |
| TCONS_00076040 | 46.4583 | 135.168 | -1.540745376 | 0.00065227 | gga-miR-9-5p    | 1495.57    | 1035.8    | 0.539516416  | 3.95E-20  | -25.3 | 4534 | Negative |
| TCONS_00076466 | 20.2034 | 7.77185 | 1.378268141  | 0.00065227 | gga-miR-16c-5p  | 11005.37   | 13366.75  | -0.270874638 | 9.68E-48  | -25.4 | 3490 | Negative |
| TCONS_00076466 | 20.2034 | 7.77185 | 1.378268141  | 0.00065227 | gga-miR-16-5p   | 56158.77   | 85642.55  | -0.599249972 | 0         | -26.6 | 3491 | Negative |
| TCONS_00076466 | 20.2034 | 7.77185 | 1.378268141  | 0.00065227 | gga-miR-15a     | 66127.71   | 71018.04  | -0.09336416  | 1.80E-32  | -25.2 | 3477 | Negative |
| TCONS_00076466 | 20.2034 | 7.77185 | 1.378268141  | 0.00065227 | gga-miR-107-3p  | 57663.43   | 59591.36  | -0.037880075 | 1.61E-05  | -34.2 | 1869 | Negative |
| TCONS_00076466 | 20.2034 | 7.77185 | 1.378268141  | 0.00065227 | gga-miR-206     | 26129.24   | 36261.21  | -0.463195462 | 0         | -25.8 | 2418 | Negative |
| TCONS_00076534 | 87.4409 | 13.7493 | 2.66895008   | 0.00065227 | gga-miR-15c-5p  | 78633.19   | 83587.39  | -0.078580488 | 2.09E-27  | -27.4 | 1261 | Negative |
| TCONS_00076534 | 87.4409 | 13.7493 | 2.66895008   | 0.00065227 | gga-miR-15b-5p  | 52240.3    | 54724.75  | -0.057463834 | 2.08E-10  | -29.3 | 3453 | Negative |
| TCONS_00076534 | 87.4409 | 13.7493 | 2.66895008   | 0.00065227 | gga-miR-128-3p  | 99089.28   | 110172.91 | -0.143402193 | 1.43E-113 | -29.4 | 2834 | Negative |
| TCONS_00076534 | 87.4409 | 13.7493 | 2.66895008   | 0.00065227 | gga-miR-10a-5p  | 2368.36    | 2753.91   | -0.208026576 | 6.49E-07  | -25.1 | 1881 | Negative |
| TCONS_00077197 | 14.1637 | 35.1917 | -1.313037016 | 0.00065227 | gga-miR-199-5p  | 157089.1   | 112030.78 | 0.497254361  | 0         | -31   | 1735 | Negative |
| TCONS_00077197 | 14.1637 | 35.1917 | -1.313037016 | 0.00065227 | gga-miR-148a-3p | 1311848.77 | 1183894.4 | 0.157627517  | 0         | -22.7 | 1258 | Negative |
| TCONS_00077460 | 34.0984 | 15.6603 | 1.122592195  | 0.00065227 | gga-miR-193a-3p | 27315.69   | 30161.5   | -0.13341187  | 6.28E-28  | -27   | 1205 | Negative |
| TCONS_00077616 | 30.455  | 14.2722 | 1.093471367  | 0.00065227 | gga-miR-183-5p  | 1050.08    | 1257.76   | -0.250790974 | 6.63E-05  | -25.9 | 607  | Negative |
| TCONS_00077616 | 30.455  | 14.2722 | 1.093471367  | 0.00065227 | gga-miR-16-5p   | 56158.77   | 85642.55  | -0.599249972 | 0         | -21.6 | 1701 | Negative |
| TCONS_00077616 | 30.455  | 14.2722 | 1.093471367  | 0.00065227 | gga-miR-15c-5p  | 78633.19   | 83587.39  | -0.078580488 | 2.09E-27  | -27.3 | 1686 | Negative |
| TCONS_00077616 | 30.455  | 14.2722 | 1.093471367  | 0.00065227 | gga-miR-15b-5p  | 52240.3    | 54724.75  | -0.057463834 | 2.08E-10  | -28.8 | 1686 | Negative |
| TCONS_00077616 | 30.455  | 14.2722 | 1.093471367  | 0.00065227 | gga-miR-15a     | 66127.71   | 71018.04  | -0.09336416  | 1.80E-32  | -23.8 | 1686 | Negative |
| TCONS_00077869 | 21.6685 | 8.7445  | 1.309151486  | 0.00065227 | gga-miR-15c-5p  | 78633.19   | 83587.39  | -0.078580488 | 2.09E-27  | -26.1 | 2062 | Negative |
| TCONS_00077869 | 21.6685 | 8.7445  | 1.309151486  | 0.00065227 | gga-miR-15b-5p  | 52240.3    | 54724.75  | -0.057463834 | 2.08E-10  | -26.3 | 2054 | Negative |
| TCONS_00077869 | 21.6685 | 8.7445  | 1.309151486  | 0.00065227 | gga-miR-10a-5p  | 2368.36    | 2753.91   | -0.208026576 | 6.49E-07  | -22.3 | 1205 | Negative |
| TCONS_00077869 | 21.6685 | 8.7445  | 1.309151486  | 0.00065227 | gga-miR-24-3p   | 18037.72   | 29569.61  | -0.703531782 | 0         | -31.5 | 1435 | Negative |
| TCONS_00081794 | 40.7184 | 20.1848 | 1.012411581  | 0.00065227 | gga-miR-16c-5p  | 11005.37   | 13366.75  | -0.270874638 | 9.68E-48  | -24.8 | 640  | Negative |
| TCONS_00081794 | 40.7184 | 20.1848 | 1.012411581  | 0.00065227 | gga-miR-16-5p   | 56158.77   | 85642.55  | -0.599249972 | 0         | -22.2 | 634  | Negative |
| TCONS_00081794 | 40.7184 | 20.1848 | 1.012411581  | 0.00065227 | gga-miR-30d-5p  | 3872505.2  | 4800290.2 | -0.300288016 | 0         | -24.5 | 188  | Negative |
| TCONS_00081794 | 40.7184 | 20.1848 | 1.012411581  | 0.00065227 | gga-miR-30b-5p  | 70087.1    | 84269.7   | -0.256298615 | 5.43E-265 | -21.3 | 189  | Negative |

|                |         |         |              |            |                 |             |           |              |           |       |      |          |
|----------------|---------|---------|--------------|------------|-----------------|-------------|-----------|--------------|-----------|-------|------|----------|
| TCONS_00082792 | 13.5483 | 31.2816 | -1.207202468 | 0.00065227 | gga-let-7f-5p   | 1810554.5   | 1701629.8 | 0.099080869  | 0         | -22   | 336  | Negative |
| TCONS_00083336 | 40.4709 | 13.6142 | 1.571772723  | 0.00065227 | gga-miR-130a-3p | 95161.71    | 100513.67 | -0.069372179 | 7.62E-26  | -25.3 | 5466 | Negative |
| TCONS_00083337 | 69.0715 | 25.2827 | 1.449940014  | 0.00065227 | gga-miR-16c-5p  | 11005.37    | 13366.75  | -0.270874638 | 9.68E-48  | -25.2 | 1080 | Negative |
| TCONS_00083337 | 69.0715 | 25.2827 | 1.449940014  | 0.00065227 | gga-miR-15b-5p  | 52240.3     | 54724.75  | -0.057463834 | 2.08E-10  | -28.7 | 1087 | Negative |
| TCONS_00083497 | 29.5313 | 14.2964 | 1.046592962  | 0.00065227 | gga-miR-24-3p   | 18037.72    | 29569.61  | -0.703531782 | 0         | -28.6 | 2211 | Negative |
| TCONS_00084705 | 20.8728 | 3.04411 | 2.777531748  | 0.00065227 | gga-miR-20a-5p  | 17755.88    | 20913.29  | -0.226556733 | 6.19E-53  | -27.6 | 7109 | Negative |
| TCONS_00084896 | 53.6619 | 17.9478 | 1.580091124  | 0.00065227 | gga-miR-30e-5p  | 3635178.24  | 4124439.2 | -0.172605412 | 0         | -25   | 519  | Negative |
| TCONS_00084896 | 53.6619 | 17.9478 | 1.580091124  | 0.00065227 | gga-miR-30d-5p  | 3872505.2   | 4800290.2 | -0.300288016 | 0         | -26   | 515  | Negative |
| TCONS_00084896 | 53.6619 | 17.9478 | 1.580091124  | 0.00065227 | gga-miR-30c-5p  | 450797.58   | 568867.75 | -0.326047081 | 0         | -29.8 | 517  | Negative |
| TCONS_00084896 | 53.6619 | 17.9478 | 1.580091124  | 0.00065227 | gga-miR-30a-5p  | 5516178.95  | 6501640.5 | -0.227568083 | 0         | -27.6 | 504  | Negative |
| TCONS_00084896 | 53.6619 | 17.9478 | 1.580091124  | 0.00065227 | gga-miR-30b-5p  | 70087.1     | 84269.7   | -0.256298615 | 5.43E-265 | -27.2 | 517  | Negative |
| TCONS_00085395 | 157.972 | 65.7808 | 1.263930409  | 0.00065227 | gga-miR-34a-5p  | 3063.87     | 4134.98   | -0.422958824 | 1.67E-34  | -29.8 | 2327 | Negative |
| TCONS_00085395 | 157.972 | 65.7808 | 1.263930409  | 0.00065227 | gga-miR-24-3p   | 18037.72    | 29569.61  | -0.703531782 | 0         | -28.2 | 1278 | Negative |
| TCONS_00085527 | 26.8778 | 13.0151 | 1.046228659  | 0.00065227 | gga-miR-30c-5p  | 450797.58   | 568867.75 | -0.326047081 | 0         | -26.7 | 2123 | Negative |
| TCONS_00085527 | 26.8778 | 13.0151 | 1.046228659  | 0.00065227 | gga-miR-24-3p   | 18037.72    | 29569.61  | -0.703531782 | 0         | -30.2 | 2732 | Negative |
| TCONS_00085551 | 55.5963 | 22.5381 | 1.302622974  | 0.00065227 | gga-miR-133c-3p | 15232674.15 | 15445951  | -0.010493064 | 1.69E-105 | -32.1 | 45   | Negative |
| TCONS_00085551 | 55.5963 | 22.5381 | 1.302622974  | 0.00065227 | gga-miR-133b-3p | 15123175    | 15329186  | -0.009953553 | 3.00E-94  | -30.5 | 49   | Negative |
| TCONS_00085551 | 55.5963 | 22.5381 | 1.302622974  | 0.00065227 | gga-miR-133a-3p | 16177058.89 | 16418962  | -0.011847135 | 4.63E-144 | -33.6 | 44   | Negative |
| TCONS_00086267 | 212.826 | 87.1596 | 1.287942929  | 0.00065227 | gga-miR-499-5p  | 3477.53     | 4200.74   | -0.263014091 | 5.47E-15  | -23.5 | 19   | Negative |
| TCONS_00086268 | 224.515 | 100.473 | 1.160003976  | 0.00065227 | gga-miR-16c-5p  | 11005.37    | 13366.75  | -0.270874638 | 9.68E-48  | -24.5 | 1830 | Negative |
| TCONS_00086268 | 224.515 | 100.473 | 1.160003976  | 0.00065227 | gga-miR-16-5p   | 56158.77    | 85642.55  | -0.599249972 | 0         | -24.1 | 1826 | Negative |
| TCONS_00086268 | 224.515 | 100.473 | 1.160003976  | 0.00065227 | gga-miR-15c-5p  | 78633.19    | 83587.39  | -0.078580488 | 2.09E-27  | -24.5 | 1823 | Negative |
| TCONS_00086268 | 224.515 | 100.473 | 1.160003976  | 0.00065227 | gga-miR-15b-5p  | 52240.3     | 54724.75  | -0.057463834 | 2.08E-10  | -26.3 | 1823 | Negative |
| TCONS_00086268 | 224.515 | 100.473 | 1.160003976  | 0.00065227 | gga-miR-15a     | 66127.71    | 71018.04  | -0.09336416  | 1.80E-32  | -23.8 | 1823 | Negative |
| TCONS_00086268 | 224.515 | 100.473 | 1.160003976  | 0.00065227 | gga-miR-140-5p  | 3682.1      | 4258.29   | -0.200178953 | 1.83E-09  | -28.4 | 934  | Negative |
| TCONS_00086268 | 224.515 | 100.473 | 1.160003976  | 0.00065227 | gga-miR-107-3p  | 57663.43    | 59591.36  | -0.037880075 | 1.61E-05  | -27.7 | 2191 | Negative |
| TCONS_00086271 | 232.726 | 86.0222 | 1.435851463  | 0.00065227 | gga-miR-34a-5p  | 3063.87     | 4134.98   | -0.422958824 | 1.67E-34  | -30.7 | 1907 | Negative |
| TCONS_00086271 | 232.726 | 86.0222 | 1.435851463  | 0.00065227 | gga-miR-222a    | 31511.46    | 36959.96  | -0.220520153 | 5.73E-88  | -32.6 | 146  | Negative |
| TCONS_00086271 | 232.726 | 86.0222 | 1.435851463  | 0.00065227 | gga-miR-16c-5p  | 11005.37    | 13366.75  | -0.270874638 | 9.68E-48  | -26.6 | 433  | Negative |
| TCONS_00086271 | 232.726 | 86.0222 | 1.435851463  | 0.00065227 | gga-miR-16-5p   | 56158.77    | 85642.55  | -0.599249972 | 0         | -26.3 | 439  | Negative |
| TCONS_00086271 | 232.726 | 86.0222 | 1.435851463  | 0.00065227 | gga-miR-15c-5p  | 78633.19    | 83587.39  | -0.078580488 | 2.09E-27  | -31.8 | 432  | Negative |
| TCONS_00086271 | 232.726 | 86.0222 | 1.435851463  | 0.00065227 | gga-miR-15b-5p  | 52240.3     | 54724.75  | -0.057463834 | 2.08E-10  | -33.6 | 432  | Negative |
| TCONS_00086271 | 232.726 | 86.0222 | 1.435851463  | 0.00065227 | gga-miR-15a     | 66127.71    | 71018.04  | -0.09336416  | 1.80E-32  | -27.8 | 432  | Negative |
| TCONS_00086276 | 191.655 | 86.19   | 1.152919238  | 0.00065227 | gga-miR-30a-5p  | 5516178.95  | 6501640.5 | -0.227568083 | 0         | -21.7 | 2191 | Negative |
| TCONS_00086276 | 191.655 | 86.19   | 1.152919238  | 0.00065227 | gga-miR-140-5p  | 3682.1      | 4258.29   | -0.200178953 | 1.83E-09  | -25.5 | 3330 | Negative |
| TCONS_00086277 | 40.2472 | 11.7619 | 1.774767289  | 0.00065227 | gga-miR-30a-3p  | 5516178.95  | 6501640.5 | -0.227568083 | 0         | -25.9 | 1167 | Negative |
| TCONS_00086277 | 40.2472 | 11.7619 | 1.774767289  | 0.00065227 | gga-miR-23b-3p  | 83219.9     | 103843.03 | -0.309837482 | 0         | -24.1 | 694  | Negative |
| TCONS_00087905 | 20.3211 | 9.22293 | 1.139681445  | 0.00065227 | gga-miR-16c-5p  | 11005.37    | 13366.75  | -0.270874638 | 9.68E-48  | -26.1 | 786  | Negative |
| TCONS_00087905 | 20.3211 | 9.22293 | 1.139681445  | 0.00065227 | gga-miR-140-5p  | 3682.1      | 4258.29   | -0.200178953 | 1.83E-09  | -24.8 | 197  | Negative |
| TCONS_00087905 | 20.3211 | 9.22293 | 1.139681445  | 0.00065227 | gga-miR-15c-5p  | 78633.19    | 83587.39  | -0.078580488 | 2.09E-27  | -25.8 | 792  | Negative |
| TCONS_00088130 | 28.4694 | 7.58554 | 1.908088296  | 0.00065227 | gga-miR-16-5p   | 56158.77    | 85642.55  | -0.599249972 | 0         | -24   | 1224 | Negative |
| TCONS_00088130 | 28.4694 | 7.58554 | 1.908088296  | 0.00065227 | gga-miR-15c-5p  | 78633.19    | 83587.39  | -0.078580488 | 2.09E-27  | -26.3 | 1216 | Negative |
| TCONS_00088130 | 28.4694 | 7.58554 | 1.908088296  | 0.00065227 | gga-miR-15b-5p  | 52240.3     | 54724.75  | -0.057463834 | 2.08E-10  | -27.6 | 1225 | Negative |
| TCONS_00088130 | 28.4694 | 7.58554 | 1.908088296  | 0.00065227 | gga-miR-15a     | 66127.71    | 71018.04  | -0.09336416  | 1.80E-32  | -24.9 | 1216 | Negative |
| TCONS_00088383 | 61.9947 | 28.4105 | 1.125720661  | 0.00065227 | gga-miR-190a-5p | 4073.03     | 4858.39   | -0.244809421 | 4.22E-15  | -23.2 | 5787 | Negative |
| TCONS_00088383 | 61.9947 | 28.4105 | 1.125720661  | 0.00065227 | gga-miR-16-5p   | 56158.77    | 85642.55  | -0.599249972 | 0         | -24.9 | 3009 | Negative |
| TCONS_00088383 | 61.9947 | 28.4105 | 1.125720661  | 0.00065227 | gga-miR-15b-5p  | 52240.3     | 54724.75  | -0.057463834 | 2.08E-10  | -31   | 3004 | Negative |
| TCONS_00088383 | 61.9947 | 28.4105 | 1.125720661  | 0.00065227 | gga-miR-15a     | 66127.71    | 71018.04  | -0.09336416  | 1.80E-32  | -27.5 | 3007 | Negative |
| TCONS_00088383 | 61.9947 | 28.4105 | 1.125720661  | 0.00065227 | gga-miR-15c-5p  | 78633.19    | 83587.39  | -0.078580488 | 2.09E-27  | -30.9 | 3007 | Negative |
| TCONS_00088564 | 28.7617 | 12.8745 | 1.159632547  | 0.00065227 | gga-miR-19a-3p  | 59718.13    | 75391.42  | -0.326664913 | 0         | -24.4 | 2792 | Negative |
| TCONS_00088564 | 28.7617 | 12.8745 | 1.159632547  | 0.00065227 | gga-miR-193a-3p | 27315.69    | 30161.5   | -0.13341187  | 6.28E-28  | -26.6 | 1506 | Negative |
| TCONS_00088564 | 28.7617 | 12.8745 | 1.159632547  | 0.00065227 | gga-miR-16-5p   | 56158.77    | 85642.55  | -0.599249972 | 0         | -24.3 | 1173 | Negative |
| TCONS_00088565 | 16.2833 | 6.29188 | 1.371830047  | 0.00065227 | gga-miR-454-3p  | 26265.61    | 42837.71  | -0.696139826 | 0         | -25.6 | 61   | Negative |
| TCONS_00088565 | 16.2833 | 6.29188 | 1.371830047  | 0.00065227 | gga-miR-16-5p   | 56158.77    | 85642.55  | -0.599249972 | 0         | -26.3 | 4981 | Negative |

|                |         |         |              |            |                 |            |           |              |           |       |      |          |
|----------------|---------|---------|--------------|------------|-----------------|------------|-----------|--------------|-----------|-------|------|----------|
| TCONS_00088565 | 16.2833 | 6.29188 | 1.371830047  | 0.00065227 | gga-miR-15c-5p  | 78633.19   | 83587.39  | -0.078580488 | 2.09E-27  | -27   | 4976 | Negative |
| TCONS_00088565 | 16.2833 | 6.29188 | 1.371830047  | 0.00065227 | gga-miR-15b-5p  | 52240.3    | 54724.75  | -0.057463834 | 2.08E-10  | -27.6 | 4368 | Negative |
| TCONS_00088565 | 16.2833 | 6.29188 | 1.371830047  | 0.00065227 | gga-miR-15a     | 66127.71   | 71018.04  | -0.09336416  | 1.80E-32  | -27.4 | 4976 | Negative |
| TCONS_00088565 | 16.2833 | 6.29188 | 1.371830047  | 0.00065227 | gga-miR-16c-5p  | 11005.37   | 13366.75  | -0.270874638 | 9.68E-48  | -25.9 | 4417 | Negative |
| TCONS_00088566 | 20.181  | 6.55342 | 1.622677764  | 0.00065227 | gga-miR-454-3p  | 26265.61   | 42837.71  | -0.696139826 | 0         | -24.6 | 293  | Negative |
| TCONS_00088566 | 20.181  | 6.55342 | 1.622677764  | 0.00065227 | gga-miR-215-5p  | 14382.9    | 20757.1   | -0.519683861 | 6.37E-245 | -22.7 | 2223 | Negative |
| TCONS_00088566 | 20.181  | 6.55342 | 1.622677764  | 0.00065227 | gga-miR-19b-3p  | 61345.53   | 77980.92  | -0.336596508 | 0         | -23.2 | 641  | Negative |
| TCONS_00088566 | 20.181  | 6.55342 | 1.622677764  | 0.00065227 | gga-miR-19a-3p  | 59718.13   | 75391.42  | -0.326664913 | 0         | -21.9 | 641  | Negative |
| TCONS_00090984 | 61.7675 | 6.0976  | 3.340534521  | 0.00065227 | gga-miR-193a-3p | 27315.69   | 30161.5   | -0.13341187  | 6.28E-28  | -27.7 | 1280 | Negative |
| TCONS_00090984 | 61.7675 | 6.0976  | 3.340534521  | 0.00065227 | gga-miR-16c-5p  | 11005.37   | 13366.75  | -0.270874638 | 9.68E-48  | -24.1 | 802  | Negative |
| TCONS_00090984 | 61.7675 | 6.0976  | 3.340534521  | 0.00065227 | gga-miR-107-3p  | 57663.43   | 59591.36  | -0.037880075 | 1.61E-05  | -30.4 | 1539 | Negative |
| TCONS_00090985 | 43.3977 | 6.59905 | 2.71728833   | 0.00065227 | gga-miR-16-5p   | 56158.77   | 85642.55  | -0.599249972 | 0         | -23.5 | 2603 | Negative |
| TCONS_00090985 | 43.3977 | 6.59905 | 2.71728833   | 0.00065227 | gga-miR-15c-5p  | 78633.19   | 83587.39  | -0.078580488 | 2.09E-27  | -27.1 | 1436 | Negative |
| TCONS_00090985 | 43.3977 | 6.59905 | 2.71728833   | 0.00065227 | gga-miR-15b-5p  | 52240.3    | 54724.75  | -0.057463834 | 2.08E-10  | -27.1 | 1436 | Negative |
| TCONS_00090985 | 43.3977 | 6.59905 | 2.71728833   | 0.00065227 | gga-miR-107-3p  | 57663.43   | 59591.36  | -0.037880075 | 1.61E-05  | -27.8 | 2603 | Negative |
| TCONS_00091413 | 5.98185 | 13.4878 | -1.17299141  | 0.00065227 | gga-miR-29a-3p  | 11632.69   | 9782.55   | 0.25946871   | 9.25E-39  | -21.8 | 290  | Negative |
| TCONS_00091413 | 5.98185 | 13.4878 | -1.17299141  | 0.00065227 | gga-miR-29c-3p  | 11632.69   | 9782.55   | 0.25946871   | 9.25E-39  | -21.7 | 290  | Negative |
| TCONS_00091420 | 3.54081 | 17.8504 | -2.333805067 | 0.00065227 | gga-miR-211     | 4336.69    | 2762.13   | 0.66037954   | 4.14E-80  | -28   | 1678 | Negative |
| TCONS_00091420 | 3.54081 | 17.8504 | -2.333805067 | 0.00065227 | gga-miR-204     | 4336.69    | 2762.13   | 0.66037954   | 4.14E-80  | -28   | 1678 | Negative |
| TCONS_00091422 | 9.70363 | 25.2372 | -1.378955409 | 0.00065227 | gga-miR-489-3p  | 6582.31    | 3822.59   | 0.793609947  | 3.09E-166 | -29.7 | 1343 | Negative |
| TCONS_00091422 | 9.70363 | 25.2372 | -1.378955409 | 0.00065227 | gga-miR-29c-3p  | 11632.69   | 9782.55   | 0.25946871   | 9.25E-39  | -23.9 | 813  | Negative |
| TCONS_00091422 | 9.70363 | 25.2372 | -1.378955409 | 0.00065227 | gga-miR-29a-3p  | 11632.69   | 9782.55   | 0.25946871   | 9.25E-39  | -25   | 812  | Negative |
| TCONS_00092803 | 20.8802 | 9.41174 | 1.149602159  | 0.00065227 | gga-miR-128-3p  | 99089.28   | 110172.91 | -0.143402193 | 1.43E-113 | -25.3 | 1514 | Negative |
| TCONS_00093337 | 314.978 | 102.785 | 1.615621326  | 0.00065227 | gga-miR-183-5p  | 1050.08    | 1257.76   | -0.250790974 | 6.63E-05  | -23   | 699  | Negative |
| TCONS_00093346 | 20.3814 | 4.55    | 2.163314703  | 0.00065227 | gga-miR-34a-5p  | 3063.87    | 4134.98   | -0.422958824 | 1.67E-34  | -27.8 | 182  | Negative |
| TCONS_00093346 | 20.3814 | 4.55    | 2.163314703  | 0.00065227 | gga-miR-23b-3p  | 83219.9    | 103843.03 | -0.309837482 | 0         | -29.3 | 351  | Negative |
| TCONS_00097167 | 120.87  | 46.6941 | 1.372144035  | 0.00065227 | gga-miR-20b-5p  | 6200.47    | 7875.37   | -0.335403686 | 2.62E-42  | -23.5 | 75   | Negative |
| TCONS_00097167 | 120.87  | 46.6941 | 1.372144035  | 0.00065227 | gga-miR-17-5p   | 23906.35   | 28303.64  | -0.234027283 | 1.05E-75  | -26.6 | 75   | Negative |
| TCONS_00097167 | 120.87  | 46.6941 | 1.372144035  | 0.00065227 | gga-miR-106-5p  | 15701.18   | 19647.31  | -0.313892371 | 1.17E-91  | -23.9 | 76   | Negative |
| TCONS_00097167 | 120.87  | 46.6941 | 1.372144035  | 0.00065227 | gga-miR-20a-5p  | 17755.88   | 20913.29  | -0.226556733 | 6.19E-53  | -24.5 | 75   | Negative |
| TCONS_00097707 | 0       | 14.6875 | -5           | 0.00065227 | gga-miR-27b-3p  | 494682.7   | 459171.63 | 0.117036382  | 0         | -22.4 | 370  | Negative |
| TCONS_00098001 | 10.2772 | 27.9447 | -1.443127428 | 0.00065227 | gga-miR-218-5p  | 6523.22    | 3337.58   | 0.97634831   | 1.72E-233 | -21.6 | 917  | Negative |
| TCONS_00098189 | 41.3761 | 17.2955 | 1.258400945  | 0.00065227 | gga-miR-19a-3p  | 59718.13   | 75391.42  | -0.326664913 | 0         | -24.3 | 2388 | Negative |
| TCONS_00098189 | 41.3761 | 17.2955 | 1.258400945  | 0.00065227 | gga-miR-24-3p   | 18037.72   | 29569.61  | -0.703531782 | 0         | -34.3 | 955  | Negative |
| TCONS_00098715 | 21.3889 | 6.10353 | 1.809146511  | 0.00065227 | gga-miR-16c-5p  | 11005.37   | 13366.75  | -0.270874638 | 9.68E-48  | -26.2 | 2359 | Negative |
| TCONS_00098715 | 21.3889 | 6.10353 | 1.809146511  | 0.00065227 | gga-miR-16-5p   | 56158.77   | 85642.55  | -0.599249972 | 0         | -26.1 | 2358 | Negative |
| TCONS_00098715 | 21.3889 | 6.10353 | 1.809146511  | 0.00065227 | gga-miR-15c-5p  | 78633.19   | 83587.39  | -0.078580488 | 2.09E-27  | -28.9 | 2353 | Negative |
| TCONS_00098715 | 21.3889 | 6.10353 | 1.809146511  | 0.00065227 | gga-miR-15b-5p  | 52240.3    | 54724.75  | -0.057463834 | 2.08E-10  | -30.4 | 2353 | Negative |
| TCONS_00098715 | 21.3889 | 6.10353 | 1.809146511  | 0.00065227 | gga-miR-15a     | 66127.71   | 71018.04  | -0.09336416  | 1.80E-32  | -26.5 | 2356 | Negative |
| TCONS_00098715 | 21.3889 | 6.10353 | 1.809146511  | 0.00065227 | gga-miR-133b-3p | 15123175   | 15329186  | -0.009953553 | 3.00E-94  | -27.2 | 1653 | Negative |
| TCONS_00099995 | 18.9931 | 8.20594 | 1.210734887  | 0.00065227 | gga-miR-1a-3p   | 362868.23  | 438537.85 | -0.263689173 | 0         | -21.3 | 4118 | Negative |
| TCONS_00099995 | 18.9931 | 8.20594 | 1.210734887  | 0.00065227 | gga-miR-16c-5p  | 11005.37   | 13366.75  | -0.270874638 | 9.68E-48  | -26.9 | 1726 | Negative |
| TCONS_00099995 | 18.9931 | 8.20594 | 1.210734887  | 0.00065227 | gga-miR-16-5p   | 56158.77   | 85642.55  | -0.599249972 | 0         | -24.8 | 1713 | Negative |
| TCONS_00099995 | 18.9931 | 8.20594 | 1.210734887  | 0.00065227 | gga-miR-15a     | 66127.71   | 71018.04  | -0.09336416  | 1.80E-32  | -24.5 | 1728 | Negative |
| TCONS_00100717 | 7.29788 | 19.4095 | -1.41121362  | 0.00065227 | gga-miR-22-3p   | 6060606.31 | 5856904.5 | 0.058890194  | 0         | -26.8 | 1310 | Negative |
| TCONS_00100717 | 7.29788 | 19.4095 | -1.41121362  | 0.00065227 | gga-miR-211     | 4336.69    | 2762.13   | 0.66037954   | 4.14E-80  | -25.5 | 2379 | Negative |
| TCONS_00100717 | 7.29788 | 19.4095 | -1.41121362  | 0.00065227 | gga-miR-204     | 4336.69    | 2762.13   | 0.66037954   | 4.14E-80  | -25.5 | 2379 | Negative |
| TCONS_00100717 | 7.29788 | 19.4095 | -1.41121362  | 0.00065227 | gga-miR-148a-3p | 1311848.77 | 1183894.4 | 0.157627517  | 0         | -26   | 1119 | Negative |
| TCONS_00101056 | 21.843  | 8.7259  | 1.32379517   | 0.00065227 | gga-miR-34a-5p  | 3063.87    | 4134.98   | -0.422958824 | 1.67E-34  | -31.2 | 271  | Negative |
| TCONS_00101056 | 21.843  | 8.7259  | 1.32379517   | 0.00065227 | gga-miR-16-5p   | 56158.77   | 85642.55  | -0.599249972 | 0         | -22.5 | 1436 | Negative |
| TCONS_00101117 | 22.4102 | 5.48328 | 2.031044473  | 0.00065227 | gga-miR-128-3p  | 99089.28   | 110172.91 | -0.143402193 | 1.43E-113 | -26.8 | 977  | Negative |
| TCONS_00102021 | 106.051 | 49.9454 | 1.086334509  | 0.00065227 | gga-miR-183-5p  | 1050.08    | 1257.76   | -0.250790974 | 6.63E-05  | -28.4 | 6267 | Negative |
| TCONS_00102021 | 106.051 | 49.9454 | 1.086334509  | 0.00065227 | gga-miR-16-5p   | 56158.77   | 85642.55  | -0.599249972 | 0         | -24   | 2430 | Negative |
| TCONS_00102021 | 106.051 | 49.9454 | 1.086334509  | 0.00065227 | gga-miR-15c-5p  | 78633.19   | 83587.39  | -0.078580488 | 2.09E-27  | -25.5 | 2429 | Negative |

|                |         |         |             |            |                 |            |           |              |           |       |      |          |
|----------------|---------|---------|-------------|------------|-----------------|------------|-----------|--------------|-----------|-------|------|----------|
| TCONS_00102021 | 106.051 | 49.9454 | 1.086334509 | 0.00065227 | gga-miR-15b-5p  | 52240.3    | 54724.75  | -0.057463834 | 2.08E-10  | -27.3 | 2426 | Negative |
| TCONS_00102615 | 15.6765 | 5.8974  | 1.410452538 | 0.00065227 | gga-miR-193a-3p | 27315.69   | 30161.5   | -0.13341187  | 6.28E-28  | -27.8 | 2618 | Negative |
| TCONS_00102729 | 21.1136 | 7.43025 | 1.50668993  | 0.00065227 | gga-miR-16c-5p  | 11005.37   | 13366.75  | -0.270874638 | 9.68E-48  | -26.2 | 1943 | Negative |
| TCONS_00102729 | 21.1136 | 7.43025 | 1.50668993  | 0.00065227 | gga-miR-16-5p   | 56158.77   | 85642.55  | -0.599249972 | 0         | -24.6 | 1947 | Negative |
| TCONS_00102729 | 21.1136 | 7.43025 | 1.50668993  | 0.00065227 | gga-miR-15a     | 66127.71   | 71018.04  | -0.09336416  | 1.80E-32  | -24.5 | 1948 | Negative |
| TCONS_00102850 | 22.8321 | 9.77165 | 1.224389463 | 0.00065227 | gga-miR-126-3p  | 186591.32  | 227736.18 | -0.27791519  | 0         | -21.4 | 1303 | Negative |
| TCONS_00102850 | 22.8321 | 9.77165 | 1.224389463 | 0.00065227 | gga-let-7i      | 271147.69  | 318697.47 | -0.223542244 | 0         | -26.5 | 2346 | Negative |
| TCONS_00104873 | 72.252  | 27.7886 | 1.37854437  | 0.00065227 | gga-miR-26a-5p  | 5512392.3  | 5684205.5 | -0.034713704 | 0         | -24   | 1155 | Negative |
| TCONS_00104873 | 72.252  | 27.7886 | 1.37854437  | 0.00065227 | gga-miR-16c-5p  | 11005.37   | 13366.75  | -0.270874638 | 9.68E-48  | -25.8 | 1244 | Negative |
| TCONS_00104873 | 72.252  | 27.7886 | 1.37854437  | 0.00065227 | gga-miR-15a     | 66127.71   | 71018.04  | -0.09336416  | 1.80E-32  | -25.1 | 1222 | Negative |
| TCONS_00105002 | 34.5337 | 13.1577 | 1.392097591 | 0.00065227 | gga-miR-16c-5p  | 11005.37   | 13366.75  | -0.270874638 | 9.68E-48  | -27   | 1546 | Negative |
| TCONS_00105002 | 34.5337 | 13.1577 | 1.392097591 | 0.00065227 | gga-miR-15c-5p  | 78633.19   | 83587.39  | -0.078580488 | 2.09E-27  | -28   | 1545 | Negative |
| TCONS_00105002 | 34.5337 | 13.1577 | 1.392097591 | 0.00065227 | gga-miR-15b-5p  | 52240.3    | 54724.75  | -0.057463834 | 2.08E-10  | -29.8 | 1545 | Negative |
| TCONS_00105326 | 22.2158 | 4.0145  | 2.468293876 | 0.00065227 | gga-miR-34a-5p  | 3063.87    | 4134.98   | -0.422958824 | 1.67E-34  | -32.6 | 1079 | Negative |
| TCONS_00105326 | 22.2158 | 4.0145  | 2.468293876 | 0.00065227 | gga-miR-193a-3p | 27315.69   | 30161.5   | -0.13341187  | 6.28E-28  | -31.5 | 4245 | Negative |
| TCONS_00105769 | 527.599 | 85.8592 | 2.619397195 | 0.00065227 | gga-miR-222a    | 31511.46   | 36959.96  | -0.220520153 | 5.73E-88  | -28.8 | 376  | Negative |
| TCONS_00105769 | 527.599 | 85.8592 | 2.619397195 | 0.00065227 | gga-miR-16c-5p  | 11005.37   | 13366.75  | -0.270874638 | 9.68E-48  | -25.2 | 616  | Negative |
| TCONS_00105769 | 527.599 | 85.8592 | 2.619397195 | 0.00065227 | gga-miR-16-5p   | 56158.77   | 85642.55  | -0.599249972 | 0         | -21.4 | 617  | Negative |
| TCONS_00105769 | 527.599 | 85.8592 | 2.619397195 | 0.00065227 | gga-miR-15c-5p  | 78633.19   | 83587.39  | -0.078580488 | 2.09E-27  | -26   | 599  | Negative |
| TCONS_00105769 | 527.599 | 85.8592 | 2.619397195 | 0.00065227 | gga-miR-15a     | 66127.71   | 71018.04  | -0.09336416  | 1.80E-32  | -22   | 599  | Negative |
| TCONS_00105769 | 527.599 | 85.8592 | 2.619397195 | 0.00065227 | gga-miR-15b-5p  | 52240.3    | 54724.75  | -0.057463834 | 2.08E-10  | -25.8 | 599  | Negative |
| TCONS_00105857 | 38.8656 | 7.88303 | 2.301671618 | 0.00065227 | gga-miR-34a-5p  | 3063.87    | 4134.98   | -0.422958824 | 1.67E-34  | -29.9 | 3072 | Negative |
| TCONS_00105857 | 38.8656 | 7.88303 | 2.301671618 | 0.00065227 | gga-miR-16c-5p  | 11005.37   | 13366.75  | -0.270874638 | 9.68E-48  | -30.8 | 2279 | Negative |
| TCONS_00105857 | 38.8656 | 7.88303 | 2.301671618 | 0.00065227 | gga-miR-16-5p   | 56158.77   | 85642.55  | -0.599249972 | 0         | -27.9 | 2269 | Negative |
| TCONS_00105857 | 38.8656 | 7.88303 | 2.301671618 | 0.00065227 | gga-miR-15a     | 66127.71   | 71018.04  | -0.09336416  | 1.80E-32  | -26.2 | 2265 | Negative |
| TCONS_00106010 | 53.3725 | 22.0086 | 1.278029213 | 0.00065227 | gga-miR-183-5p  | 1050.08    | 1257.76   | -0.250790974 | 6.63E-05  | -26.7 | 1046 | Negative |
| TCONS_00106010 | 53.3725 | 22.0086 | 1.278029213 | 0.00065227 | gga-miR-16-5p   | 56158.77   | 85642.55  | -0.599249972 | 0         | -24.7 | 1528 | Negative |
| TCONS_00106010 | 53.3725 | 22.0086 | 1.278029213 | 0.00065227 | gga-miR-15c-5p  | 78633.19   | 83587.39  | -0.078580488 | 2.09E-27  | -27.8 | 1521 | Negative |
| TCONS_00106010 | 53.3725 | 22.0086 | 1.278029213 | 0.00065227 | gga-miR-15b-5p  | 52240.3    | 54724.75  | -0.057463834 | 2.08E-10  | -29.1 | 1838 | Negative |
| TCONS_00106010 | 53.3725 | 22.0086 | 1.278029213 | 0.00065227 | gga-miR-24-3p   | 18037.72   | 29569.61  | -0.703531782 | 0         | -30.2 | 1646 | Negative |
| TCONS_00106665 | 25.3911 | 3.29355 | 2.94660754  | 0.00065227 | gga-miR-455-5p  | 2386.54    | 2712.81   | -0.175301048 | 3.23E-05  | -26.5 | 2038 | Negative |
| TCONS_00106665 | 25.3911 | 3.29355 | 2.94660754  | 0.00065227 | gga-miR-16-5p   | 56158.77   | 85642.55  | -0.599249972 | 0         | -25.5 | 1346 | Negative |
| TCONS_00106665 | 25.3911 | 3.29355 | 2.94660754  | 0.00065227 | gga-miR-15c-5p  | 78633.19   | 83587.39  | -0.078580488 | 2.09E-27  | -26.9 | 1343 | Negative |
| TCONS_00106665 | 25.3911 | 3.29355 | 2.94660754  | 0.00065227 | gga-miR-15b-5p  | 52240.3    | 54724.75  | -0.057463834 | 2.08E-10  | -28.4 | 1343 | Negative |
| TCONS_00106665 | 25.3911 | 3.29355 | 2.94660754  | 0.00065227 | gga-miR-15a     | 66127.71   | 71018.04  | -0.09336416  | 1.80E-32  | -24.9 | 1945 | Negative |
| TCONS_00106665 | 25.3911 | 3.29355 | 2.94660754  | 0.00065227 | gga-miR-16c-5p  | 11005.37   | 13366.75  | -0.270874638 | 9.68E-48  | -26   | 1350 | Negative |
| TCONS_00107235 | 16.1492 | 7.22613 | 1.160167584 | 0.00065227 | gga-miR-17-5p   | 23906.35   | 28303.64  | -0.234027283 | 1.05E-75  | -28.3 | 995  | Negative |
| TCONS_00107235 | 16.1492 | 7.22613 | 1.160167584 | 0.00065227 | gga-miR-16c-5p  | 11005.37   | 13366.75  | -0.270874638 | 9.68E-48  | -25.6 | 2287 | Negative |
| TCONS_00107235 | 16.1492 | 7.22613 | 1.160167584 | 0.00065227 | gga-miR-15b-5p  | 52240.3    | 54724.75  | -0.057463834 | 2.08E-10  | -26   | 2796 | Negative |
| TCONS_00107235 | 16.1492 | 7.22613 | 1.160167584 | 0.00065227 | gga-miR-106-5p  | 15701.18   | 19647.31  | -0.313892371 | 1.17E-91  | -24.9 | 991  | Negative |
| TCONS_00107235 | 16.1492 | 7.22613 | 1.160167584 | 0.00065227 | gga-miR-20a-5p  | 17755.88   | 20913.29  | -0.226556733 | 6.19E-53  | -23.8 | 996  | Negative |
| TCONS_00107385 | 137.17  | 68.2505 | 1.007053469 | 0.00065227 | gga-miR-107-3p  | 57663.43   | 59591.36  | -0.037880075 | 1.61E-05  | -33.9 | 1727 | Negative |
| TCONS_00107444 | 24.4142 | 6.54715 | 1.898781567 | 0.00065227 | gga-miR-16c-5p  | 11005.37   | 13366.75  | -0.270874638 | 9.68E-48  | -22.8 | 1657 | Negative |
| TCONS_00107444 | 24.4142 | 6.54715 | 1.898781567 | 0.00065227 | gga-miR-16-5p   | 56158.77   | 85642.55  | -0.599249972 | 0         | -23.4 | 1657 | Negative |
| TCONS_00107450 | 113.261 | 23.0323 | 2.297920782 | 0.00065227 | gga-miR-454-3p  | 26265.61   | 42837.71  | -0.696139826 | 0         | -26.6 | 1434 | Negative |
| TCONS_00107450 | 113.261 | 23.0323 | 2.297920782 | 0.00065227 | gga-miR-130c-3p | 95061.7    | 101023.35 | -0.078186239 | 1.45E-32  | -27.1 | 1434 | Negative |
| TCONS_00107450 | 113.261 | 23.0323 | 2.297920782 | 0.00065227 | gga-miR-130a-3p | 95161.71   | 100513.67 | -0.069372179 | 7.62E-26  | -23.1 | 1434 | Negative |
| TCONS_00107450 | 113.261 | 23.0323 | 2.297920782 | 0.00065227 | gga-miR-130b-3p | 6614.13    | 10662.16  | -0.679309987 | 1.30E-203 | -24.6 | 1434 | Negative |
| TCONS_00108098 | 33.6891 | 11.8126 | 1.511955345 | 0.00065227 | gga-miR-30e-5p  | 3635178.24 | 4124439.2 | -0.172605412 | 0         | -21   | 2124 | Negative |
| TCONS_00108098 | 33.6891 | 11.8126 | 1.511955345 | 0.00065227 | gga-miR-215-5p  | 14382.9    | 20757.1   | -0.519683861 | 6.37E-245 | -21.9 | 261  | Negative |
| TCONS_00112672 | 126.588 | 50.5031 | 1.325696798 | 0.00065227 | gga-miR-16-5p   | 56158.77   | 85642.55  | -0.599249972 | 0         | -21.1 | 429  | Negative |
| TCONS_00112672 | 126.588 | 50.5031 | 1.325696798 | 0.00065227 | gga-miR-15c-5p  | 78633.19   | 83587.39  | -0.078580488 | 2.09E-27  | -22.5 | 426  | Negative |
| TCONS_00112672 | 126.588 | 50.5031 | 1.325696798 | 0.00065227 | gga-miR-15b-5p  | 52240.3    | 54724.75  | -0.057463834 | 2.08E-10  | -24.5 | 426  | Negative |
| TCONS_00112894 | 24.0587 | 0       | 5           | 0.00065227 | gga-miR-183-5p  | 1050.08    | 1257.76   | -0.250790974 | 6.63E-05  | -24   | 490  | Negative |



|                |         |         |              |            |                 |            |           |              |           |       |      |          |
|----------------|---------|---------|--------------|------------|-----------------|------------|-----------|--------------|-----------|-------|------|----------|
| TCONS_00116213 | 8.86948 | 24.5128 | -1.466613857 | 0.00065227 | gga-miR-199-5p  | 157089.1   | 112030.78 | 0.497254361  | 0         | -25.8 | 1135 | Negative |
| TCONS_00001714 | 0       | 20.3823 | -5           | 0.00065227 | gga-miR-24-3p   | 18037.72   | 29569.61  | -0.703531782 | 0         | -29.9 | 43   | Postive  |
| TCONS_00001714 | 0       | 20.3823 | -5           | 0.00065227 | gga-miR-16c-5p  | 11005.37   | 13366.75  | -0.270874638 | 9.68E-48  | -27.3 | 349  | Postive  |
| TCONS_00001714 | 0       | 20.3823 | -5           | 0.00065227 | gga-miR-16-5p   | 56158.77   | 85642.55  | -0.599249972 | 0         | -24.6 | 350  | Postive  |
| TCONS_00001714 | 0       | 20.3823 | -5           | 0.00065227 | gga-miR-15c-5p  | 78633.19   | 83587.39  | -0.078580488 | 2.09E-27  | -26.7 | 26   | Postive  |
| TCONS_00001714 | 0       | 20.3823 | -5           | 0.00065227 | gga-miR-15b-5p  | 52240.3    | 54724.75  | -0.057463834 | 2.08E-10  | -27.2 | 339  | Postive  |
| TCONS_00001714 | 0       | 20.3823 | -5           | 0.00065227 | gga-miR-15a     | 66127.71   | 71018.04  | -0.09336416  | 1.80E-32  | -27.6 | 350  | Postive  |
| TCONS_00001934 | 0       | 13.8781 | -5           | 0.00065227 | gga-miR-454-3p  | 26265.61   | 42837.71  | -0.696139826 | 0         | -21.1 | 113  | Postive  |
| TCONS_00002892 | 30.8816 | 13.9662 | 1.144807964  | 0.00065227 | gga-miR-489-3p  | 6582.31    | 3822.59   | 0.793609947  | 3.09E-166 | -25.9 | 1948 | Postive  |
| TCONS_00002892 | 30.8816 | 13.9662 | 1.144807964  | 0.00065227 | gga-miR-29c-3p  | 11632.69   | 9782.55   | 0.25946871   | 9.25E-39  | -20.2 | 1428 | Postive  |
| TCONS_00002892 | 30.8816 | 13.9662 | 1.144807964  | 0.00065227 | gga-miR-211     | 4336.69    | 2762.13   | 0.66037954   | 4.14E-80  | -30.8 | 828  | Postive  |
| TCONS_00002892 | 30.8816 | 13.9662 | 1.144807964  | 0.00065227 | gga-miR-204     | 4336.69    | 2762.13   | 0.66037954   | 4.14E-80  | -30.8 | 828  | Postive  |
| TCONS_00003147 | 0       | 13.4177 | -5           | 0.00065227 | gga-miR-181b-5p | 104412.41  | 123095.75 | -0.227921315 | 0         | -24.5 | 573  | Postive  |
| TCONS_00003147 | 0       | 13.4177 | -5           | 0.00065227 | gga-miR-130c-3p | 95061.7    | 101023.35 | -0.078186239 | 1.45E-32  | -25.5 | 621  | Postive  |
| TCONS_00003147 | 0       | 13.4177 | -5           | 0.00065227 | gga-miR-130a-3p | 95161.71   | 100513.67 | -0.069372179 | 7.62E-26  | -21.9 | 621  | Postive  |
| TCONS_00003147 | 0       | 13.4177 | -5           | 0.00065227 | gga-miR-130b-3p | 6614.13    | 10662.16  | -0.679309987 | 1.30E-203 | -24.4 | 621  | Postive  |
| TCONS_00007326 | 16.3522 | 6.55724 | 1.318324142  | 0.00065227 | gga-miR-1729-5p | 1368.28    | 1150.89   | 0.259179981  | 1.59E-05  | -29.3 | 1256 | Postive  |
| TCONS_00007326 | 16.3522 | 6.55724 | 1.318324142  | 0.00065227 | gga-miR-153-3p  | 2145.62    | 1644.13   | 0.393636657  | 2.22E-16  | -21.6 | 1220 | Postive  |
| TCONS_00007863 | 15.8108 | 34.4929 | -1.125389061 | 0.00065227 | gga-miR-16c-5p  | 11005.37   | 13366.75  | -0.270874638 | 9.68E-48  | -23.8 | 938  | Postive  |
| TCONS_00007863 | 15.8108 | 34.4929 | -1.125389061 | 0.00065227 | gga-miR-16-5p   | 56158.77   | 85642.55  | -0.599249972 | 0         | -22.4 | 943  | Postive  |
| TCONS_00007863 | 15.8108 | 34.4929 | -1.125389061 | 0.00065227 | gga-miR-15b-5p  | 52240.3    | 54724.75  | -0.057463834 | 2.08E-10  | -25.8 | 950  | Postive  |
| TCONS_00007863 | 15.8108 | 34.4929 | -1.125389061 | 0.00065227 | gga-miR-15a     | 66127.71   | 71018.04  | -0.09336416  | 1.80E-32  | -24.4 | 948  | Postive  |
| TCONS_00008384 | 16.21   | 6.22013 | 1.381867453  | 0.00065227 | gga-miR-489-3p  | 6582.31    | 3822.59   | 0.793609947  | 3.09E-166 | -29.6 | 3603 | Postive  |
| TCONS_00008384 | 16.21   | 6.22013 | 1.381867453  | 0.00065227 | gga-miR-365-3p  | 27974.83   | 26158.05  | 0.10644081   | 3.39E-17  | -23.6 | 513  | Postive  |
| TCONS_00008384 | 16.21   | 6.22013 | 1.381867453  | 0.00065227 | gga-miR-205a    | 4900.37    | 2137.36   | 1.206627201  | 2.97E-247 | -34   | 1895 | Postive  |
| TCONS_00008384 | 16.21   | 6.22013 | 1.381867453  | 0.00065227 | gga-miR-204     | 4336.69    | 2762.13   | 0.66037954   | 4.14E-80  | -34.9 | 2202 | Postive  |
| TCONS_00008384 | 16.21   | 6.22013 | 1.381867453  | 0.00065227 | gga-miR-211     | 4336.69    | 2762.13   | 0.66037954   | 4.14E-80  | -34.9 | 2202 | Postive  |
| TCONS_00008501 | 24.6292 | 8.88655 | 1.470674428  | 0.00065227 | gga-miR-22-3p   | 6060606.31 | 5856904.5 | 0.058890194  | 0         | -28.8 | 716  | Postive  |
| TCONS_00008501 | 24.6292 | 8.88655 | 1.470674428  | 0.00065227 | gga-let-7g-5p   | 161712.18  | 156890.77 | 0.053234308  | 7.39E-25  | -23.5 | 746  | Postive  |
| TCONS_00009388 | 32.9007 | 10.7821 | 1.609480084  | 0.00065227 | gga-miR-148a-3p | 1311848.77 | 1183894.4 | 0.157627517  | 0         | -26.8 | 1591 | Postive  |
| TCONS_00009388 | 32.9007 | 10.7821 | 1.609480084  | 0.00065227 | gga-let-7j-5p   | 1933522.85 | 1763522.9 | 0.142337939  | 0         | -24.9 | 1565 | Postive  |
| TCONS_00009388 | 32.9007 | 10.7821 | 1.609480084  | 0.00065227 | gga-let-7g-5p   | 161712.18  | 156890.77 | 0.053234308  | 7.39E-25  | -24.4 | 1558 | Postive  |
| TCONS_00009388 | 32.9007 | 10.7821 | 1.609480084  | 0.00065227 | gga-let-7c-5p   | 1103087.6  | 913460.21 | 0.281700016  | 0         | -26.4 | 1563 | Postive  |
| TCONS_00009388 | 32.9007 | 10.7821 | 1.609480084  | 0.00065227 | gga-let-7b-5p   | 372600.78  | 329030.81 | 0.188974455  | 0         | -29   | 1563 | Postive  |
| TCONS_00009388 | 32.9007 | 10.7821 | 1.609480084  | 0.00065227 | gga-let-7f-5p   | 1810554.5  | 1701629.8 | 0.099080869  | 0         | -23.6 | 1568 | Postive  |
| TCONS_00009389 | 20.4289 | 9.03648 | 1.176778713  | 0.00065227 | gga-miR-22-3p   | 6060606.31 | 5856904.5 | 0.058890194  | 0         | -27   | 735  | Postive  |
| TCONS_00010966 | 6.57829 | 20.5863 | -1.645900041 | 0.00065227 | gga-miR-128-3p  | 99089.28   | 110172.91 | -0.143402193 | 1.43E-113 | -21   | 506  | Postive  |
| TCONS_00012640 | 7.2516  | 28.8383 | -1.991614868 | 0.00065227 | gga-miR-107-3p  | 57663.43   | 59591.36  | -0.037880075 | 1.61E-05  | -28.8 | 1219 | Postive  |
| TCONS_00012640 | 7.2516  | 28.8383 | -1.991614868 | 0.00065227 | gga-miR-16-5p   | 56158.77   | 85642.55  | -0.599249972 | 0         | -22.5 | 1220 | Postive  |
| TCONS_00012640 | 7.2516  | 28.8383 | -1.991614868 | 0.00065227 | gga-miR-15a     | 66127.71   | 71018.04  | -0.09336416  | 1.80E-32  | -26.5 | 1216 | Postive  |
| TCONS_00012643 | 6.23131 | 20.6642 | -1.729526116 | 0.00065227 | gga-miR-30a-3p  | 5516178.95 | 6501640.5 | -0.227568083 | 0         | -23.7 | 2102 | Postive  |
| TCONS_00012708 | 3.91098 | 14.1338 | -1.853547336 | 0.00065227 | gga-miR-130c-3p | 95061.7    | 101023.35 | -0.078186239 | 1.45E-32  | -22.9 | 2772 | Postive  |
| TCONS_00013296 | 5.78851 | 19.577  | -1.75789576  | 0.00065227 | gga-miR-24-3p   | 18037.72   | 29569.61  | -0.703531782 | 0         | -31.1 | 938  | Postive  |
| TCONS_00013520 | 30.0984 | 11.3774 | 1.403515891  | 0.00065227 | gga-miR-29c-3p  | 11632.69   | 9782.55   | 0.25946871   | 9.25E-39  | -21.5 | 1116 | Postive  |
| TCONS_00013520 | 30.0984 | 11.3774 | 1.403515891  | 0.00065227 | gga-miR-29a-3p  | 11632.69   | 9782.55   | 0.25946871   | 9.25E-39  | -21.5 | 1116 | Postive  |
| TCONS_00014571 | 81.6373 | 33.0739 | 1.303535294  | 0.00065227 | gga-miR-29a-3p  | 11632.69   | 9782.55   | 0.25946871   | 9.25E-39  | -24.6 | 1848 | Postive  |
| TCONS_00014571 | 81.6373 | 33.0739 | 1.303535294  | 0.00065227 | gga-miR-144-3p  | 3209.33    | 1972.95   | 0.711484191  | 8.31E-68  | -21.2 | 4302 | Postive  |
| TCONS_00015768 | 7.50805 | 18.7743 | -1.322248955 | 0.00065227 | gga-miR-128-3p  | 99089.28   | 110172.91 | -0.143402193 | 1.43E-113 | -24   | 846  | Postive  |
| TCONS_00016255 | 23.8493 | 8.24307 | 1.532693271  | 0.00065227 | gga-miR-148a-3p | 1311848.77 | 1183894.4 | 0.157627517  | 0         | -23.7 | 1527 | Postive  |
| TCONS_00017879 | 19.9329 | 9.69345 | 1.040069488  | 0.00065227 | gga-miR-29a-3p  | 11632.69   | 9782.55   | 0.25946871   | 9.25E-39  | -23.5 | 1112 | Postive  |
| TCONS_00017879 | 19.9329 | 9.69345 | 1.040069488  | 0.00065227 | gga-miR-22-3p   | 6060606.31 | 5856904.5 | 0.058890194  | 0         | -26.7 | 457  | Postive  |
| TCONS_00017879 | 19.9329 | 9.69345 | 1.040069488  | 0.00065227 | gga-miR-489-3p  | 6582.31    | 3822.59   | 0.793609947  | 3.09E-166 | -27.4 | 806  | Postive  |
| TCONS_00017879 | 19.9329 | 9.69345 | 1.040069488  | 0.00065227 | gga-miR-218-5p  | 6523.22    | 3337.58   | 0.97634831   | 1.72E-233 | -22.7 | 3390 | Postive  |
| TCONS_00019791 | 42.0528 | 16.3461 | 1.363255397  | 0.00065227 | gga-miR-22-3p   | 6060606.31 | 5856904.5 | 0.058890194  | 0         | -23.5 | 2797 | Postive  |

|                |         |         |              |            |                 |             |           |              |           |       |      |         |
|----------------|---------|---------|--------------|------------|-----------------|-------------|-----------|--------------|-----------|-------|------|---------|
| TCONS_00020068 | 26.0711 | 5.20942 | 2.323256793  | 0.00065227 | gga-miR-148a-3p | 1311848.77  | 1183894.4 | 0.157627517  | 0         | -25   | 2625 | Postive |
| TCONS_00020312 | 16.0844 | 43.084  | -1.421490079 | 0.00065227 | gga-miR-19b-3p  | 61345.53    | 77980.92  | -0.336596508 | 0         | -24.8 | 1538 | Postive |
| TCONS_00020312 | 16.0844 | 43.084  | -1.421490079 | 0.00065227 | gga-miR-19a-3p  | 59718.13    | 75391.42  | -0.326664913 | 0         | -23   | 1538 | Postive |
| TCONS_00020377 | 25.4937 | 7.4824  | 1.768567775  | 0.00065227 | gga-miR-211     | 4336.69     | 2762.13   | 0.66037954   | 4.14E-80  | -32.7 | 1447 | Postive |
| TCONS_00020829 | 37.5693 | 8.70813 | 2.109119385  | 0.00065227 | gga-miR-29c-3p  | 11632.69    | 9782.55   | 0.25946871   | 9.25E-39  | -26.4 | 1276 | Postive |
| TCONS_00020829 | 37.5693 | 8.70813 | 2.109119385  | 0.00065227 | gga-miR-29a-3p  | 11632.69    | 9782.55   | 0.25946871   | 9.25E-39  | -26.5 | 1276 | Postive |
| TCONS_00020829 | 37.5693 | 8.70813 | 2.109119385  | 0.00065227 | gga-let-7g-5p   | 161712.18   | 156890.77 | 0.053234308  | 7.39E-25  | -25.8 | 1416 | Postive |
| TCONS_00020829 | 37.5693 | 8.70813 | 2.109119385  | 0.00065227 | gga-miR-22-3p   | 6060606.31  | 5856904.5 | 0.058890194  | 0         | -29.8 | 1761 | Postive |
| TCONS_00020829 | 37.5693 | 8.70813 | 2.109119385  | 0.00065227 | gga-miR-142-5p  | 108462.71   | 54058.88  | 1.014162038  | 0         | -23.3 | 1940 | Postive |
| TCONS_00021334 | 7.86986 | 18.7209 | -1.250239917 | 0.00065227 | gga-miR-15c-5p  | 78633.19    | 83587.39  | -0.078580488 | 2.09E-27  | -29.1 | 334  | Postive |
| TCONS_00021334 | 7.86986 | 18.7209 | -1.250239917 | 0.00065227 | gga-miR-15a     | 66127.71    | 71018.04  | -0.09336416  | 1.80E-32  | -25.7 | 334  | Postive |
| TCONS_00021334 | 7.86986 | 18.7209 | -1.250239917 | 0.00065227 | gga-miR-107-3p  | 57663.43    | 59591.36  | -0.037880075 | 1.61E-05  | -30.2 | 877  | Postive |
| TCONS_00021334 | 7.86986 | 18.7209 | -1.250239917 | 0.00065227 | gga-miR-16-5p   | 56158.77    | 85642.55  | -0.599249972 | 0         | -25   | 333  | Postive |
| TCONS_00021334 | 7.86986 | 18.7209 | -1.250239917 | 0.00065227 | gga-miR-15b-5p  | 52240.3     | 54724.75  | -0.057463834 | 2.08E-10  | -30.6 | 334  | Postive |
| TCONS_00022107 | 13.8641 | 32.3627 | -1.22297801  | 0.00065227 | gga-miR-34a-5p  | 3063.87     | 4134.98   | -0.422958824 | 1.67E-34  | -31.5 | 9564 | Postive |
| TCONS_00022107 | 13.8641 | 32.3627 | -1.22297801  | 0.00065227 | gga-miR-16-5p   | 56158.77    | 85642.55  | -0.599249972 | 0         | -24.7 | 2933 | Postive |
| TCONS_00022107 | 13.8641 | 32.3627 | -1.22297801  | 0.00065227 | gga-miR-15a     | 66127.71    | 71018.04  | -0.09336416  | 1.80E-32  | -26   | 867  | Postive |
| TCONS_00022108 | 7.83267 | 30.5995 | -1.965931997 | 0.00065227 | gga-miR-16c-5p  | 11005.37    | 13366.75  | -0.270874638 | 9.68E-48  | -26.4 | 2272 | Postive |
| TCONS_00022108 | 7.83267 | 30.5995 | -1.965931997 | 0.00065227 | gga-miR-15b-5p  | 52240.3     | 54724.75  | -0.057463834 | 2.08E-10  | -24   | 1087 | Postive |
| TCONS_00022108 | 7.83267 | 30.5995 | -1.965931997 | 0.00065227 | gga-miR-15a     | 66127.71    | 71018.04  | -0.09336416  | 1.80E-32  | -21.5 | 1087 | Postive |
| TCONS_00022958 | 22.453  | 8.8992  | 1.335160665  | 0.00065227 | gga-miR-148a-3p | 1311848.77  | 1183894.4 | 0.157627517  | 0         | -26.7 | 1936 | Postive |
| TCONS_00022958 | 22.453  | 8.8992  | 1.335160665  | 0.00065227 | gga-miR-1416-5p | 6400.48     | 5680.46   | 0.181738783  | 1.39E-11  | -28.8 | 537  | Postive |
| TCONS_00023407 | 284.05  | 40.9104 | 2.795605355  | 0.00065227 | gga-miR-22-3p   | 6060606.31  | 5856904.5 | 0.058890194  | 0         | -27.1 | 1441 | Postive |
| TCONS_00025658 | 48.2642 | 21.1417 | 1.190862078  | 0.00065227 | gga-miR-22-3p   | 6060606.31  | 5856904.5 | 0.058890194  | 0         | -28.3 | 6039 | Postive |
| TCONS_00026670 | 16.3183 | 3.63184 | 2.167718217  | 0.00065227 | gga-miR-29c-3p  | 11632.69    | 9782.55   | 0.25946871   | 9.25E-39  | -21.5 | 2611 | Postive |
| TCONS_00026670 | 16.3183 | 3.63184 | 2.167718217  | 0.00065227 | gga-miR-29a-3p  | 11632.69    | 9782.55   | 0.25946871   | 9.25E-39  | -21.5 | 2611 | Postive |
| TCONS_00026670 | 16.3183 | 3.63184 | 2.167718217  | 0.00065227 | gga-miR-148a-3p | 1311848.77  | 1183894.4 | 0.157627517  | 0         | -26.3 | 1581 | Postive |
| TCONS_00027797 | 43.1275 | 13.6649 | 1.658133187  | 0.00065227 | gga-miR-29c-3p  | 11632.69    | 9782.55   | 0.25946871   | 9.25E-39  | -27.5 | 7857 | Postive |
| TCONS_00027797 | 43.1275 | 13.6649 | 1.658133187  | 0.00065227 | gga-miR-29a-3p  | 11632.69    | 9782.55   | 0.25946871   | 9.25E-39  | -28.8 | 7856 | Postive |
| TCONS_00027797 | 43.1275 | 13.6649 | 1.658133187  | 0.00065227 | gga-miR-218-5p  | 6523.22     | 3337.58   | 0.97634831   | 1.72E-233 | -24.3 | 4936 | Postive |
| TCONS_00027797 | 43.1275 | 13.6649 | 1.658133187  | 0.00065227 | gga-miR-125b-5p | 404462.27   | 285609.43 | 0.511527957  | 0         | -28.5 | 3825 | Postive |
| TCONS_00027797 | 43.1275 | 13.6649 | 1.658133187  | 0.00065227 | gga-miR-27b-3p  | 494682.7    | 459171.63 | 0.117036382  | 0         | -32.6 | 5238 | Postive |
| TCONS_00028187 | 30.5135 | 0       | 5            | 0.00065227 | gga-miR-29c-3p  | 11632.69    | 9782.55   | 0.25946871   | 9.25E-39  | -22.4 | 132  | Postive |
| TCONS_00028187 | 30.5135 | 0       | 5            | 0.00065227 | gga-miR-29a-3p  | 11632.69    | 9782.55   | 0.25946871   | 9.25E-39  | -22.7 | 131  | Postive |
| TCONS_00028367 | 49.1918 | 14.5421 | 1.758182225  | 0.00065227 | gga-miR-29c-3p  | 11632.69    | 9782.55   | 0.25946871   | 9.25E-39  | -23.2 | 3492 | Postive |
| TCONS_00028367 | 49.1918 | 14.5421 | 1.758182225  | 0.00065227 | gga-miR-29a-3p  | 11632.69    | 9782.55   | 0.25946871   | 9.25E-39  | -23.2 | 3492 | Postive |
| TCONS_00028370 | 0       | 23.8278 | -5           | 0.00065227 | gga-miR-19b-3p  | 61345.53    | 77980.92  | -0.336596508 | 0         | -24.9 | 182  | Postive |
| TCONS_00028370 | 0       | 23.8278 | -5           | 0.00065227 | gga-miR-19a-3p  | 59718.13    | 75391.42  | -0.326664913 | 0         | -22.3 | 182  | Postive |
| TCONS_00028370 | 0       | 23.8278 | -5           | 0.00065227 | gga-miR-16c-5p  | 11005.37    | 13366.75  | -0.270874638 | 9.68E-48  | -21.3 | 310  | Postive |
| TCONS_00028370 | 0       | 23.8278 | -5           | 0.00065227 | gga-miR-16-5p   | 56158.77    | 85642.55  | -0.599249972 | 0         | -25   | 309  | Postive |
| TCONS_00028370 | 0       | 23.8278 | -5           | 0.00065227 | gga-miR-15c-5p  | 78633.19    | 83587.39  | -0.078580488 | 2.09E-27  | -28.4 | 304  | Postive |
| TCONS_00028370 | 0       | 23.8278 | -5           | 0.00065227 | gga-miR-15b-5p  | 52240.3     | 54724.75  | -0.057463834 | 2.08E-10  | -27   | 302  | Postive |
| TCONS_00028370 | 0       | 23.8278 | -5           | 0.00065227 | gga-miR-15a     | 66127.71    | 71018.04  | -0.09336416  | 1.80E-32  | -27.2 | 305  | Postive |
| TCONS_00028370 | 0       | 23.8278 | -5           | 0.00065227 | gga-miR-133c-3p | 15232674.15 | 15445951  | -0.010493064 | 1.69E-105 | -26.1 | 381  | Postive |
| TCONS_00028370 | 0       | 23.8278 | -5           | 0.00065227 | gga-miR-133b-3p | 15123175    | 15329186  | -0.009953553 | 3.00E-94  | -24.3 | 382  | Postive |
| TCONS_00028370 | 0       | 23.8278 | -5           | 0.00065227 | gga-miR-133a-3p | 16177058.89 | 16418962  | -0.011847135 | 4.63E-144 | -26.3 | 381  | Postive |
| TCONS_00028442 | 51.5242 | 11.0487 | 2.221373569  | 0.00065227 | gga-miR-29c-3p  | 11632.69    | 9782.55   | 0.25946871   | 9.25E-39  | -24.9 | 1231 | Postive |
| TCONS_00028442 | 51.5242 | 11.0487 | 2.221373569  | 0.00065227 | gga-miR-29a-3p  | 11632.69    | 9782.55   | 0.25946871   | 9.25E-39  | -25   | 1231 | Postive |
| TCONS_00028446 | 26.7116 | 9.24387 | 1.530897519  | 0.00065227 | gga-miR-29c-3p  | 11632.69    | 9782.55   | 0.25946871   | 9.25E-39  | -22.2 | 290  | Postive |
| TCONS_00028446 | 26.7116 | 9.24387 | 1.530897519  | 0.00065227 | gga-miR-29a-3p  | 11632.69    | 9782.55   | 0.25946871   | 9.25E-39  | -22.7 | 289  | Postive |
| TCONS_00028729 | 21.0019 | 3.83473 | 2.453322944  | 0.00065227 | gga-miR-22-3p   | 6060606.31  | 5856904.5 | 0.058890194  | 0         | -27.2 | 2390 | Postive |
| TCONS_00029092 | 22.9055 | 5.8829  | 1.961094637  | 0.00065227 | gga-miR-221-3p  | 50108.32    | 48024.93  | 0.070833101  | 4.73E-14  | -29.1 | 1055 | Postive |
| TCONS_00029163 | 26.1836 | 12.9231 | 1.018711282  | 0.00065227 | gga-miR-489-3p  | 6582.31     | 3822.59   | 0.793609947  | 3.09E-166 | -27.3 | 3085 | Postive |
| TCONS_00029380 | 66.2238 | 23.6615 | 1.484808262  | 0.00065227 | gga-miR-125b-5p | 404462.27   | 285609.43 | 0.511527957  | 0         | -27.6 | 2081 | Postive |

|                |         |         |              |            |                 |             |           |              |           |       |       |         |
|----------------|---------|---------|--------------|------------|-----------------|-------------|-----------|--------------|-----------|-------|-------|---------|
| TCONS_00029380 | 66.2238 | 23.6615 | 1.484808262  | 0.00065227 | gga-miR-148a-3p | 1311848.77  | 1183894.4 | 0.157627517  | 0         | -27.4 | 1736  | Postive |
| TCONS_00030106 | 91.6641 | 26.3147 | 1.800487869  | 0.00065227 | gga-miR-29c-3p  | 11632.69    | 9782.55   | 0.25946871   | 9.25E-39  | -22.2 | 491   | Postive |
| TCONS_00030106 | 91.6641 | 26.3147 | 1.800487869  | 0.00065227 | gga-miR-29a-3p  | 11632.69    | 9782.55   | 0.25946871   | 9.25E-39  | -22.2 | 491   | Postive |
| TCONS_00030106 | 91.6641 | 26.3147 | 1.800487869  | 0.00065227 | gga-miR-144-3p  | 3209.33     | 1972.95   | 0.711484191  | 8.31E-68  | -22.1 | 219   | Postive |
| TCONS_00031421 | 75.5902 | 31.0737 | 1.28250517   | 0.00065227 | gga-miR-489-3p  | 6582.31     | 3822.59   | 0.793609947  | 3.09E-166 | -27.7 | 40    | Postive |
| TCONS_00031421 | 75.5902 | 31.0737 | 1.28250517   | 0.00065227 | gga-miR-148a-3p | 1311848.77  | 1183894.4 | 0.157627517  | 0         | -25.8 | 1558  | Postive |
| TCONS_00037041 | 30.3968 | 13.3563 | 1.186399049  | 0.00065227 | gga-miR-153-3p  | 2145.62     | 1644.13   | 0.393636657  | 2.22E-16  | -20.4 | 650   | Postive |
| TCONS_00037618 | 14.6177 | 4.9097  | 1.574009552  | 0.00065227 | gga-miR-155     | 5204.94     | 1759.22   | 1.574512065  | 0         | -22.2 | 3050  | Postive |
| TCONS_00037645 | 32.4087 | 12.8305 | 1.336803759  | 0.00065227 | gga-miR-29c-3p  | 11632.69    | 9782.55   | 0.25946871   | 9.25E-39  | -22.1 | 528   | Postive |
| TCONS_00037645 | 32.4087 | 12.8305 | 1.336803759  | 0.00065227 | gga-miR-29a-3p  | 11632.69    | 9782.55   | 0.25946871   | 9.25E-39  | -22.5 | 1594  | Postive |
| TCONS_00037691 | 22.4706 | 7.93589 | 1.501574714  | 0.00065227 | gga-miR-489-3p  | 6582.31     | 3822.59   | 0.793609947  | 3.09E-166 | -26   | 3245  | Postive |
| TCONS_00037693 | 26.4826 | 8.71658 | 1.603210668  | 0.00065227 | gga-miR-205a    | 4900.37     | 2137.36   | 1.206627201  | 2.97E-247 | -28.4 | 1805  | Postive |
| TCONS_00037696 | 23.3492 | 9.6157  | 1.279909329  | 0.00065227 | gga-miR-22-3p   | 6060606.31  | 5856904.5 | 0.058890194  | 0         | -25.2 | 17    | Postive |
| TCONS_00037697 | 30.3747 | 13.8805 | 1.129810623  | 0.00065227 | gga-miR-148a-3p | 1311848.77  | 1183894.4 | 0.157627517  | 0         | -23.4 | 250   | Postive |
| TCONS_00038772 | 22.5777 | 6.32077 | 1.836726301  | 0.00065227 | gga-miR-489-3p  | 6582.31     | 3822.59   | 0.793609947  | 3.09E-166 | -26.4 | 3603  | Postive |
| TCONS_00038772 | 22.5777 | 6.32077 | 1.836726301  | 0.00065227 | gga-miR-205a    | 4900.37     | 2137.36   | 1.206627201  | 2.97E-247 | -31.1 | 3436  | Postive |
| TCONS_00038772 | 22.5777 | 6.32077 | 1.836726301  | 0.00065227 | gga-miR-1729-5p | 1368.28     | 1150.89   | 0.259179981  | 1.59E-05  | -27.2 | 2282  | Postive |
| TCONS_00040094 | 45.4284 | 16.4646 | 1.464227031  | 0.00065227 | gga-miR-218-5p  | 6523.22     | 3337.58   | 0.97634831   | 1.72E-233 | -23.3 | 618   | Postive |
| TCONS_00040094 | 45.4284 | 16.4646 | 1.464227031  | 0.00065227 | gga-miR-181a-5p | 2087579.9   | 1996273.7 | 0.074088345  | 0         | -24.7 | 1284  | Postive |
| TCONS_00040147 | 29.2494 | 146.362 | -2.323062099 | 0.00065227 | gga-miR-24-3p   | 18037.72    | 29569.61  | -0.703531782 | 0         | -33   | 5272  | Postive |
| TCONS_00040147 | 29.2494 | 146.362 | -2.323062099 | 0.00065227 | gga-miR-16-5p   | 56158.77    | 85642.55  | -0.599249972 | 0         | -26.4 | 12494 | Postive |
| TCONS_00040147 | 29.2494 | 146.362 | -2.323062099 | 0.00065227 | gga-miR-107-3p  | 57663.43    | 59591.36  | -0.037880075 | 1.61E-05  | -35   | 7078  | Postive |
| TCONS_00040214 | 12.0901 | 31.7766 | -1.394138591 | 0.00065227 | gga-miR-133c-3p | 15232674.15 | 15445951  | -0.010493064 | 1.69E-105 | -24.9 | 617   | Postive |
| TCONS_00040214 | 12.0901 | 31.7766 | -1.394138591 | 0.00065227 | gga-miR-133b-3p | 15123175    | 15329186  | -0.009953553 | 3.00E-94  | -24.8 | 616   | Postive |
| TCONS_00040214 | 12.0901 | 31.7766 | -1.394138591 | 0.00065227 | gga-miR-133a-3p | 16177058.89 | 16418962  | -0.011847135 | 4.63E-144 | -24.8 | 616   | Postive |
| TCONS_00040214 | 12.0901 | 31.7766 | -1.394138591 | 0.00065227 | gga-miR-130c-3p | 95061.7     | 101023.35 | -0.078186239 | 1.45E-32  | -25.7 | 1808  | Postive |
| TCONS_00040214 | 12.0901 | 31.7766 | -1.394138591 | 0.00065227 | gga-miR-130a-3p | 95161.71    | 100513.67 | -0.069372179 | 7.62E-26  | -25.7 | 1808  | Postive |
| TCONS_00040214 | 12.0901 | 31.7766 | -1.394138591 | 0.00065227 | gga-miR-107-3p  | 57663.43    | 59591.36  | -0.037880075 | 1.61E-05  | -29.9 | 3206  | Postive |
| TCONS_00040214 | 12.0901 | 31.7766 | -1.394138591 | 0.00065227 | gga-miR-454-3p  | 26265.61    | 42837.71  | -0.696139826 | 0         | -26.8 | 1811  | Postive |
| TCONS_00040214 | 12.0901 | 31.7766 | -1.394138591 | 0.00065227 | gga-miR-130b-3p | 6614.13     | 10662.16  | -0.679309987 | 1.30E-203 | -24   | 1808  | Postive |
| TCONS_00040224 | 23.8611 | 7.77219 | 1.618267478  | 0.00065227 | gga-miR-125b-5p | 404462.27   | 285609.43 | 0.511527957  | 0         | -29   | 3095  | Postive |
| TCONS_00040224 | 23.8611 | 7.77219 | 1.618267478  | 0.00065227 | gga-miR-22-3p   | 6060606.31  | 5856904.5 | 0.058890194  | 0         | -29.2 | 3102  | Postive |
| TCONS_00040485 | 40.2425 | 11.7594 | 1.774905482  | 0.00065227 | gga-let-7c-5p   | 1103087.6   | 913460.21 | 0.281700016  | 0         | -25.9 | 358   | Postive |
| TCONS_00040485 | 40.2425 | 11.7594 | 1.774905482  | 0.00065227 | gga-let-7j-5p   | 1933522.85  | 1763522.9 | 0.142337939  | 0         | -23.8 | 363   | Postive |
| TCONS_00045553 | 2.0953  | 16.8451 | -3.007100268 | 0.00065227 | gga-miR-130a-3p | 95161.71    | 100513.67 | -0.069372179 | 7.62E-26  | -22.6 | 912   | Postive |
| TCONS_00047466 | 13.0703 | 26.8866 | -1.040595072 | 0.00065227 | gga-miR-128-3p  | 99089.28    | 110172.91 | -0.143402193 | 1.43E-113 | -24.9 | 936   | Postive |
| TCONS_00047722 | 9.55594 | 22.0874 | -1.208753903 | 0.00065227 | gga-miR-15a     | 66127.71    | 71018.04  | -0.09336416  | 1.80E-32  | -22   | 2010  | Postive |
| TCONS_00047722 | 9.55594 | 22.0874 | -1.208753903 | 0.00065227 | gga-miR-10a-5p  | 2368.36     | 2753.91   | -0.208026576 | 6.49E-07  | -22.6 | 2097  | Postive |
| TCONS_00047731 | 15.7687 | 33.5939 | -1.091135565 | 0.00065227 | gga-miR-24-3p   | 18037.72    | 29569.61  | -0.703531782 | 0         | -32.2 | 235   | Postive |
| TCONS_00047731 | 15.7687 | 33.5939 | -1.091135565 | 0.00065227 | gga-miR-15b-5p  | 52240.3     | 54724.75  | -0.057463834 | 2.08E-10  | -29.3 | 1423  | Postive |
| TCONS_00047731 | 15.7687 | 33.5939 | -1.091135565 | 0.00065227 | gga-miR-15a     | 66127.71    | 71018.04  | -0.09336416  | 1.80E-32  | -22.1 | 1424  | Postive |
| TCONS_00047731 | 15.7687 | 33.5939 | -1.091135565 | 0.00065227 | gga-miR-10a-5p  | 2368.36     | 2753.91   | -0.208026576 | 6.49E-07  | -25.2 | 17    | Postive |
| TCONS_00047731 | 15.7687 | 33.5939 | -1.091135565 | 0.00065227 | gga-miR-16c-5p  | 11005.37    | 13366.75  | -0.270874638 | 9.68E-48  | -25   | 1419  | Postive |
| TCONS_00047731 | 15.7687 | 33.5939 | -1.091135565 | 0.00065227 | gga-miR-15c-5p  | 78633.19    | 83587.39  | -0.078580488 | 2.09E-27  | -27.3 | 1423  | Postive |
| TCONS_00048903 | 11.7928 | 31.3091 | -1.408675735 | 0.00065227 | gga-miR-128-3p  | 99089.28    | 110172.91 | -0.143402193 | 1.43E-113 | -25.9 | 597   | Postive |
| TCONS_00053510 | 43.6012 | 12.5854 | 1.792616771  | 0.00065227 | gga-miR-205a    | 4900.37     | 2137.36   | 1.206627201  | 2.97E-247 | -28.6 | 717   | Postive |
| TCONS_00053510 | 43.6012 | 12.5854 | 1.792616771  | 0.00065227 | gga-miR-125b-5p | 404462.27   | 285609.43 | 0.511527957  | 0         | -26.5 | 2480  | Postive |
| TCONS_00053513 | 36.5029 | 14.0367 | 1.378807284  | 0.00065227 | gga-miR-10a-5p  | 4289804.8   | 3459316   | 0.319991626  | 0         | -24.7 | 1817  | Postive |
| TCONS_00054104 | 80.4489 | 4.79283 | 4.069123021  | 0.00065227 | gga-miR-125b-5p | 404462.27   | 285609.43 | 0.511527957  | 0         | -27.6 | 748   | Postive |
| TCONS_00054544 | 36.7898 | 15.8322 | 1.216444091  | 0.00065227 | gga-miR-148a-3p | 1311848.77  | 1183894.4 | 0.157627517  | 0         | -22.9 | 961   | Postive |
| TCONS_00055448 | 12.7638 | 3.73711 | 1.772062973  | 0.00065227 | gga-miR-27b-3p  | 494682.7    | 459171.63 | 0.117036382  | 0         | -28.2 | 2361  | Postive |
| TCONS_00055448 | 12.7638 | 3.73711 | 1.772062973  | 0.00065227 | gga-miR-101-3p  | 474140.24   | 401158.63 | 0.250707448  | 0         | -22.2 | 1226  | Postive |
| TCONS_00055766 | 30.4794 | 10.7695 | 1.500883232  | 0.00065227 | gga-miR-142-5p  | 108462.71   | 54058.88  | 1.014162038  | 0         | -22.8 | 1052  | Postive |
| TCONS_00055769 | 32.5242 | 12.6609 | 1.361133609  | 0.00065227 | gga-miR-148a-3p | 1311848.77  | 1183894.4 | 0.157627517  | 0         | -28.5 | 4200  | Postive |

|                |         |         |              |            |                 |             |           |              |           |       |       |         |
|----------------|---------|---------|--------------|------------|-----------------|-------------|-----------|--------------|-----------|-------|-------|---------|
| TCONS_00055773 | 42.7021 | 16.171  | 1.400898124  | 0.00065227 | gga-miR-365-3p  | 27974.83    | 26158.05  | 0.10644081   | 3.39E-17  | -32.1 | 5277  | Postive |
| TCONS_00055773 | 42.7021 | 16.171  | 1.400898124  | 0.00065227 | gga-miR-218-5p  | 6523.22     | 3337.58   | 0.97634831   | 1.72E-233 | -23.1 | 3006  | Postive |
| TCONS_00055773 | 42.7021 | 16.171  | 1.400898124  | 0.00065227 | gga-miR-211     | 4336.69     | 2762.13   | 0.66037954   | 4.14E-80  | -35.5 | 3660  | Postive |
| TCONS_00055773 | 42.7021 | 16.171  | 1.400898124  | 0.00065227 | gga-miR-153-3p  | 2145.62     | 1644.13   | 0.393636657  | 2.22E-16  | -23.6 | 2689  | Postive |
| TCONS_00055773 | 42.7021 | 16.171  | 1.400898124  | 0.00065227 | gga-miR-144-3p  | 3209.33     | 1972.95   | 0.711484191  | 8.31E-68  | -23.2 | 11143 | Postive |
| TCONS_00055774 | 25.8374 | 12.5061 | 1.046828942  | 0.00065227 | gga-miR-22-3p   | 6060606.31  | 5856904.5 | 0.058890194  | 0         | -29.1 | 4058  | Postive |
| TCONS_00056652 | 26.1065 | 10.7377 | 1.281724051  | 0.00065227 | gga-miR-29a-3p  | 11632.69    | 9782.55   | 0.25946871   | 9.25E-39  | -22.3 | 964   | Postive |
| TCONS_00056652 | 26.1065 | 10.7377 | 1.281724051  | 0.00065227 | gga-miR-22-3p   | 6060606.31  | 5856904.5 | 0.058890194  | 0         | -26.7 | 181   | Postive |
| TCONS_00056652 | 26.1065 | 10.7377 | 1.281724051  | 0.00065227 | gga-miR-205a    | 4900.37     | 2137.36   | 1.206627201  | 2.97E-247 | -29   | 1113  | Postive |
| TCONS_00057772 | 21326.7 | 76934.5 | -1.850969949 | 0.00065227 | gga-miR-24-3p   | 18037.72    | 29569.61  | -0.703531782 | 0         | -26.5 | 267   | Postive |
| TCONS_00058565 | 32.8076 | 10.4135 | 1.655575016  | 0.00065227 | gga-miR-22-3p   | 6060606.31  | 5856904.5 | 0.058890194  | 0         | -25.8 | 713   | Postive |
| TCONS_00059257 | 26.1176 | 10.0275 | 1.381060365  | 0.00065227 | gga-miR-489-3p  | 6582.31     | 3822.59   | 0.793609947  | 3.09E-166 | -31   | 3826  | Postive |
| TCONS_00059257 | 26.1176 | 10.0275 | 1.381060365  | 0.00065227 | gga-miR-218-5p  | 6523.22     | 3337.58   | 0.97634831   | 1.72E-233 | -25.8 | 3186  | Postive |
| TCONS_00059418 | 39.5438 | 13.6139 | 1.538371097  | 0.00065227 | gga-miR-29c-3p  | 11632.69    | 9782.55   | 0.25946871   | 9.25E-39  | -22.6 | 69    | Postive |
| TCONS_00059418 | 39.5438 | 13.6139 | 1.538371097  | 0.00065227 | gga-miR-29a-3p  | 11632.69    | 9782.55   | 0.25946871   | 9.25E-39  | -22.7 | 69    | Postive |
| TCONS_00059983 | 25.6665 | 0       | 5            | 0.00065227 | gga-let-7j-5p   | 1933522.85  | 1763522.9 | 0.142337939  | 0         | -23.1 | 322   | Postive |
| TCONS_00059983 | 25.6665 | 0       | 5            | 0.00065227 | gga-let-7g-5p   | 161712.18   | 156890.77 | 0.053234308  | 7.39E-25  | -24.7 | 325   | Postive |
| TCONS_00059983 | 25.6665 | 0       | 5            | 0.00065227 | gga-let-7f-5p   | 1810554.5   | 1701629.8 | 0.099080869  | 0         | -22.3 | 336   | Postive |
| TCONS_00059983 | 25.6665 | 0       | 5            | 0.00065227 | gga-let-7c-5p   | 1103087.6   | 913460.21 | 0.281700016  | 0         | -23.4 | 329   | Postive |
| TCONS_00059983 | 25.6665 | 0       | 5            | 0.00065227 | gga-let-7b-5p   | 372600.78   | 329030.81 | 0.188974455  | 0         | -23.4 | 329   | Postive |
| TCONS_00061933 | 37.5793 | 16.1068 | 1.222268297  | 0.00065227 | gga-miR-221-3p  | 50108.32    | 48024.93  | 0.070833101  | 4.73E-14  | -31.8 | 7513  | Postive |
| TCONS_00062863 | 57.3983 | 10.6343 | 2.432282937  | 0.00065227 | gga-miR-27b-3p  | 494682.7    | 459171.63 | 0.117036382  | 0         | -23.6 | 115   | Postive |
| TCONS_00063889 | 24.0259 | 10.6354 | 1.17571618   | 0.00065227 | gga-miR-22-3p   | 6060606.31  | 5856904.5 | 0.058890194  | 0         | -27.6 | 2983  | Postive |
| TCONS_00063889 | 24.0259 | 10.6354 | 1.17571618   | 0.00065227 | gga-miR-221-3p  | 50108.32    | 48024.93  | 0.070833101  | 4.73E-14  | -29.5 | 1876  | Postive |
| TCONS_00064325 | 92.1425 | 36.3473 | 1.342018542  | 0.00065227 | gga-miR-9-5p    | 1495.57     | 1035.8    | 0.539516416  | 3.95E-20  | -23.2 | 586   | Postive |
| TCONS_00064325 | 92.1425 | 36.3473 | 1.342018542  | 0.00065227 | gga-miR-218-5p  | 6523.22     | 3337.58   | 0.97634831   | 1.72E-233 | -23.3 | 1326  | Postive |
| TCONS_00064325 | 92.1425 | 36.3473 | 1.342018542  | 0.00065227 | gga-miR-205a    | 4900.37     | 2137.36   | 1.206627201  | 2.97E-247 | -30.2 | 696   | Postive |
| TCONS_00064342 | 0       | 52.8614 | -5           | 0.00065227 | gga-miR-15c-5p  | 78633.19    | 83587.39  | -0.078580488 | 2.09E-27  | -23.7 | 228   | Postive |
| TCONS_00064342 | 0       | 52.8614 | -5           | 0.00065227 | gga-miR-15b-5p  | 52240.3     | 54724.75  | -0.057463834 | 2.08E-10  | -24.8 | 231   | Postive |
| TCONS_00066080 | 24.7522 | 9.75945 | 1.342685008  | 0.00065227 | gga-miR-142-3p  | 108462.71   | 54058.88  | 1.014162038  | 0         | -22.4 | 1021  | Postive |
| TCONS_00066855 | 39.5926 | 17.6038 | 1.169343924  | 0.00065227 | gga-miR-205a    | 4900.37     | 2137.36   | 1.206627201  | 2.97E-247 | -25.8 | 939   | Postive |
| TCONS_00066855 | 39.5926 | 17.6038 | 1.169343924  | 0.00065227 | gga-miR-125b-5p | 404462.27   | 285609.43 | 0.511527957  | 0         | -25.9 | 1514  | Postive |
| TCONS_00067025 | 217.549 | 100.556 | 1.113341218  | 0.00065227 | gga-miR-29c-3p  | 11632.69    | 9782.55   | 0.25946871   | 9.25E-39  | -28.2 | 2635  | Postive |
| TCONS_00067025 | 217.549 | 100.556 | 1.113341218  | 0.00065227 | gga-miR-29a-3p  | 11632.69    | 9782.55   | 0.25946871   | 9.25E-39  | -28.6 | 2634  | Postive |
| TCONS_00067025 | 217.549 | 100.556 | 1.113341218  | 0.00065227 | gga-miR-155     | 5204.94     | 1759.22   | 1.574512065  | 0         | -23.1 | 1627  | Postive |
| TCONS_00071234 | 10.5643 | 23.6336 | -1.161642229 | 0.00065227 | gga-miR-19b-3p  | 61345.53    | 77980.92  | -0.336596508 | 0         | -23.1 | 3542  | Postive |
| TCONS_00071234 | 10.5643 | 23.6336 | -1.161642229 | 0.00065227 | gga-miR-10a-5p  | 2368.36     | 2753.91   | -0.208026576 | 6.49E-07  | -24.9 | 4602  | Postive |
| TCONS_00071234 | 10.5643 | 23.6336 | -1.161642229 | 0.00065227 | gga-miR-19a-3p  | 59718.13    | 75391.42  | -0.326664913 | 0         | -23.6 | 3542  | Postive |
| TCONS_00071898 | 29.5629 | 14.6796 | 1.009975142  | 0.00065227 | gga-miR-148a-3p | 1311848.77  | 1183894.4 | 0.157627517  | 0         | -25.8 | 1462  | Postive |
| TCONS_00071899 | 31.5742 | 15.2997 | 1.045242816  | 0.00065227 | gga-miR-29c-3p  | 11632.69    | 9782.55   | 0.25946871   | 9.25E-39  | -21   | 411   | Postive |
| TCONS_00071902 | 27.5107 | 12.8805 | 1.094804251  | 0.00065227 | gga-miR-22-3p   | 6060606.31  | 5856904.5 | 0.058890194  | 0         | -25.3 | 231   | Postive |
| TCONS_00073069 | 9.65156 | 22.1572 | -1.198941528 | 0.00065227 | gga-miR-222a    | 31511.46    | 36959.96  | -0.220520153 | 5.73E-88  | -29   | 2692  | Postive |
| TCONS_00073069 | 9.65156 | 22.1572 | -1.198941528 | 0.00065227 | gga-miR-206     | 26129.24    | 36261.21  | -0.463195462 | 0         | -28.6 | 4751  | Postive |
| TCONS_00073069 | 9.65156 | 22.1572 | -1.198941528 | 0.00065227 | gga-miR-15c-5p  | 78633.19    | 83587.39  | -0.078580488 | 2.09E-27  | -24.5 | 1206  | Postive |
| TCONS_00073069 | 9.65156 | 22.1572 | -1.198941528 | 0.00065227 | gga-miR-15b-5p  | 52240.3     | 54724.75  | -0.057463834 | 2.08E-10  | -26.3 | 1206  | Postive |
| TCONS_00073069 | 9.65156 | 22.1572 | -1.198941528 | 0.00065227 | gga-miR-133c-3p | 15232674.15 | 15445951  | -0.010493064 | 1.69E-105 | -30.9 | 2121  | Postive |
| TCONS_00073069 | 9.65156 | 22.1572 | -1.198941528 | 0.00065227 | gga-miR-133a-3p | 16177058.89 | 16418962  | -0.011847135 | 4.63E-144 | -30.2 | 2121  | Postive |
| TCONS_00073874 | 27.755  | 12.5188 | 1.148651415  | 0.00065227 | gga-miR-125b-5p | 404462.27   | 285609.43 | 0.511527957  | 0         | -29.9 | 1268  | Postive |
| TCONS_00074529 | 52.536  | 7.84763 | 2.742977432  | 0.00065227 | gga-miR-22-3p   | 6060606.31  | 5856904.5 | 0.058890194  | 0         | -27.1 | 1432  | Postive |
| TCONS_00074758 | 46.6367 | 18.9838 | 1.296696901  | 0.00065227 | gga-miR-218-5p  | 6523.22     | 3337.58   | 0.97634831   | 1.72E-233 | -21.6 | 945   | Postive |
| TCONS_00075810 | 0       | 30.3253 | -5           | 0.00065227 | gga-miR-16-5p   | 56158.77    | 85642.55  | -0.599249972 | 0         | -22.6 | 373   | Postive |
| TCONS_00076040 | 46.4583 | 135.168 | -1.540745376 | 0.00065227 | gga-miR-190a-5p | 4073.03     | 4858.39   | -0.244809421 | 4.22E-15  | -23   | 5655  | Postive |
| TCONS_00076040 | 46.4583 | 135.168 | -1.540745376 | 0.00065227 | gga-miR-15a     | 66127.71    | 71018.04  | -0.09336416  | 1.80E-32  | -24.6 | 6347  | Postive |
| TCONS_00076040 | 46.4583 | 135.168 | -1.540745376 | 0.00065227 | gga-miR-107-3p  | 57663.43    | 59591.36  | -0.037880075 | 1.61E-05  | -30.7 | 6345  | Postive |

|                |         |         |              |            |                 |            |           |              |           |       |       |         |
|----------------|---------|---------|--------------|------------|-----------------|------------|-----------|--------------|-----------|-------|-------|---------|
| TCONS_00076466 | 20.2034 | 7.77185 | 1.378268141  | 0.00065227 | gga-miR-27b-3p  | 494682.7   | 459171.63 | 0.117036382  | 0         | -28.3 | 1945  | Postive |
| TCONS_00076466 | 20.2034 | 7.77185 | 1.378268141  | 0.00065227 | gga-miR-29c-3p  | 11632.69   | 9782.55   | 0.25946871   | 9.25E-39  | -23.4 | 778   | Postive |
| TCONS_00077197 | 14.1637 | 35.1917 | -1.313037016 | 0.00065227 | gga-miR-215-5p  | 14382.9    | 20757.1   | -0.519683861 | 6.37E-245 | -22   | 4067  | Postive |
| TCONS_00077197 | 14.1637 | 35.1917 | -1.313037016 | 0.00065227 | gga-miR-20b-5p  | 6200.47    | 7875.37   | -0.335403686 | 2.62E-42  | -27.3 | 5129  | Postive |
| TCONS_00077197 | 14.1637 | 35.1917 | -1.313037016 | 0.00065227 | gga-miR-20a-5p  | 17755.88   | 20913.29  | -0.226556733 | 6.19E-53  | -26.6 | 5129  | Postive |
| TCONS_00077197 | 14.1637 | 35.1917 | -1.313037016 | 0.00065227 | gga-miR-19a-3p  | 59718.13   | 75391.42  | -0.326664913 | 0         | -23   | 5355  | Postive |
| TCONS_00077197 | 14.1637 | 35.1917 | -1.313037016 | 0.00065227 | gga-miR-183-5p  | 1050.08    | 1257.76   | -0.250790974 | 6.63E-05  | -24.9 | 4730  | Postive |
| TCONS_00077197 | 14.1637 | 35.1917 | -1.313037016 | 0.00065227 | gga-miR-17-5p   | 23906.35   | 28303.64  | -0.234027283 | 1.05E-75  | -28.8 | 5122  | Postive |
| TCONS_00077197 | 14.1637 | 35.1917 | -1.313037016 | 0.00065227 | gga-miR-140-5p  | 3682.1     | 4258.29   | -0.200178953 | 1.83E-09  | -26.9 | 145   | Postive |
| TCONS_00077197 | 14.1637 | 35.1917 | -1.313037016 | 0.00065227 | gga-miR-130c-3p | 95061.7    | 101023.35 | -0.078186239 | 1.45E-32  | -23.9 | 3487  | Postive |
| TCONS_00077197 | 14.1637 | 35.1917 | -1.313037016 | 0.00065227 | gga-miR-106-5p  | 15701.18   | 19647.31  | -0.313892371 | 1.17E-91  | -25.1 | 5129  | Postive |
| TCONS_00077869 | 21.6685 | 8.7445  | 1.309151486  | 0.00065227 | gga-miR-205a    | 4900.37    | 2137.36   | 1.206627201  | 2.97E-247 | -27.4 | 2013  | Postive |
| TCONS_00077869 | 21.6685 | 8.7445  | 1.309151486  | 0.00065227 | gga-miR-142-3p  | 108462.71  | 54058.88  | 1.014162038  | 0         | -21.5 | 3611  | Postive |
| TCONS_00081794 | 40.7184 | 20.1848 | 1.012411581  | 0.00065227 | gga-miR-153-3p  | 2145.62    | 1644.13   | 0.393636657  | 2.22E-16  | -23.7 | 2272  | Postive |
| TCONS_00081794 | 40.7184 | 20.1848 | 1.012411581  | 0.00065227 | gga-miR-125b-5p | 404462.27  | 285609.43 | 0.511527957  | 0         | -27.7 | 2820  | Postive |
| TCONS_00082792 | 13.5483 | 31.2816 | -1.207202468 | 0.00065227 | gga-miR-16c-5p  | 11005.37   | 13366.75  | -0.270874638 | 9.68E-48  | -25   | 2132  | Postive |
| TCONS_00082792 | 13.5483 | 31.2816 | -1.207202468 | 0.00065227 | gga-miR-107-3p  | 57663.43   | 59591.36  | -0.037880075 | 1.61E-05  | -30   | 2140  | Postive |
| TCONS_00082794 | 18.2293 | 37.1506 | -1.027126348 | 0.00065227 | gga-miR-193a-3p | 27315.69   | 30161.5   | -0.13341187  | 6.28E-28  | -27   | 1825  | Postive |
| TCONS_00083497 | 29.5313 | 14.2964 | 1.046592962  | 0.00065227 | gga-miR-29c-3p  | 11632.69   | 9782.55   | 0.25946871   | 9.25E-39  | -23.9 | 858   | Postive |
| TCONS_00083497 | 29.5313 | 14.2964 | 1.046592962  | 0.00065227 | gga-miR-29a-3p  | 11632.69   | 9782.55   | 0.25946871   | 9.25E-39  | -24.4 | 857   | Postive |
| TCONS_00084705 | 20.8728 | 3.04411 | 2.777531748  | 0.00065227 | gga-miR-29a-3p  | 11632.69   | 9782.55   | 0.25946871   | 9.25E-39  | -23.6 | 3632  | Postive |
| TCONS_00084705 | 20.8728 | 3.04411 | 2.777531748  | 0.00065227 | gga-miR-29c-3p  | 11632.69   | 9782.55   | 0.25946871   | 9.25E-39  | -23.3 | 3197  | Postive |
| TCONS_00084896 | 53.6619 | 17.9478 | 1.580091124  | 0.00065227 | gga-let-7j-5p   | 1933522.85 | 1763522.9 | 0.142337939  | 0         | -24.7 | 962   | Postive |
| TCONS_00084896 | 53.6619 | 17.9478 | 1.580091124  | 0.00065227 | gga-let-7g-5p   | 161712.18  | 156890.77 | 0.053234308  | 7.39E-25  | -24.3 | 962   | Postive |
| TCONS_00084896 | 53.6619 | 17.9478 | 1.580091124  | 0.00065227 | gga-let-7f-5p   | 1810554.5  | 1701629.8 | 0.099080869  | 0         | -24.3 | 986   | Postive |
| TCONS_00084896 | 53.6619 | 17.9478 | 1.580091124  | 0.00065227 | gga-let-7c-5p   | 1103087.6  | 913460.21 | 0.281700016  | 0         | -27.8 | 973   | Postive |
| TCONS_00085527 | 26.8778 | 13.0151 | 1.046228659  | 0.00065227 | gga-miR-29c-3p  | 11632.69   | 9782.55   | 0.25946871   | 9.25E-39  | -24.1 | 1949  | Postive |
| TCONS_00085527 | 26.8778 | 13.0151 | 1.046228659  | 0.00065227 | gga-miR-29a-3p  | 11632.69   | 9782.55   | 0.25946871   | 9.25E-39  | -24.2 | 1949  | Postive |
| TCONS_00085527 | 26.8778 | 13.0151 | 1.046228659  | 0.00065227 | gga-miR-22-3p   | 6060606.31 | 5856904.5 | 0.058890194  | 0         | -31.5 | 448   | Postive |
| TCONS_00086268 | 224.515 | 100.473 | 1.160003976  | 0.00065227 | gga-miR-148a-3p | 1311848.77 | 1183894.4 | 0.157627517  | 0         | -21.3 | 152   | Postive |
| TCONS_00086268 | 224.515 | 100.473 | 1.160003976  | 0.00065227 | gga-let-7j-5p   | 1933522.85 | 1763522.9 | 0.142337939  | 0         | -22.5 | 447   | Postive |
| TCONS_00086268 | 224.515 | 100.473 | 1.160003976  | 0.00065227 | gga-let-7b-5p   | 372600.78  | 329030.81 | 0.188974455  | 0         | -27.1 | 449   | Postive |
| TCONS_00086271 | 232.726 | 86.0222 | 1.435851463  | 0.00065227 | gga-miR-221-3p  | 50108.32   | 48024.93  | 0.070833101  | 4.73E-14  | -26.3 | 164   | Postive |
| TCONS_00086277 | 40.2472 | 11.7619 | 1.774767289  | 0.00065227 | gga-miR-211     | 4336.69    | 2762.13   | 0.66037954   | 4.14E-80  | -26.9 | 1861  | Postive |
| TCONS_00086277 | 40.2472 | 11.7619 | 1.774767289  | 0.00065227 | gga-miR-204     | 4336.69    | 2762.13   | 0.66037954   | 4.14E-80  | -26.9 | 1861  | Postive |
| TCONS_00087905 | 20.3211 | 9.22293 | 1.139681445  | 0.00065227 | gga-miR-365-3p  | 27974.83   | 26158.05  | 0.10644081   | 3.39E-17  | -20.2 | 2920  | Postive |
| TCONS_00088383 | 61.9947 | 28.4105 | 1.125720661  | 0.00065227 | gga-let-7j-5p   | 1933522.85 | 1763522.9 | 0.142337939  | 0         | -26.8 | 10069 | Postive |
| TCONS_00088383 | 61.9947 | 28.4105 | 1.125720661  | 0.00065227 | gga-let-7c-5p   | 1103087.6  | 913460.21 | 0.281700016  | 0         | -29.1 | 10063 | Postive |
| TCONS_00088383 | 61.9947 | 28.4105 | 1.125720661  | 0.00065227 | gga-let-7b-5p   | 372600.78  | 329030.81 | 0.188974455  | 0         | -31.3 | 10063 | Postive |
| TCONS_00088383 | 61.9947 | 28.4105 | 1.125720661  | 0.00065227 | gga-miR-22-3p   | 6060606.31 | 5856904.5 | 0.058890194  | 0         | -31.7 | 9128  | Postive |
| TCONS_00088564 | 28.7617 | 12.8745 | 1.159632547  | 0.00065227 | gga-miR-125b-5p | 404462.27  | 285609.43 | 0.511527957  | 0         | -26.5 | 877   | Postive |
| TCONS_00090984 | 61.7675 | 6.0976  | 3.340534521  | 0.00065227 | gga-miR-9-5p    | 1495.57    | 1035.8    | 0.539516416  | 3.95E-20  | -24.9 | 1438  | Postive |
| TCONS_00090984 | 61.7675 | 6.0976  | 3.340534521  | 0.00065227 | gga-miR-29c-3p  | 11632.69   | 9782.55   | 0.25946871   | 9.25E-39  | -24.9 | 347   | Postive |
| TCONS_00090984 | 61.7675 | 6.0976  | 3.340534521  | 0.00065227 | gga-miR-29a-3p  | 11632.69   | 9782.55   | 0.25946871   | 9.25E-39  | -24.9 | 347   | Postive |
| TCONS_00090985 | 43.3977 | 6.59905 | 2.71728833   | 0.00065227 | gga-miR-125b-5p | 404462.27  | 285609.43 | 0.511527957  | 0         | -31.7 | 556   | Postive |
| TCONS_00091413 | 5.98185 | 13.4878 | -1.17299141  | 0.00065227 | gga-miR-183-5p  | 1050.08    | 1257.76   | -0.250790974 | 6.63E-05  | -27.7 | 4066  | Postive |
| TCONS_00091420 | 3.54081 | 17.8504 | -2.333805067 | 0.00065227 | gga-miR-20a-5p  | 17755.88   | 20913.29  | -0.226556733 | 6.19E-53  | -24.3 | 203   | Postive |
| TCONS_00091420 | 3.54081 | 17.8504 | -2.333805067 | 0.00065227 | gga-miR-106-5p  | 15701.18   | 19647.31  | -0.313892371 | 1.17E-91  | -25.4 | 203   | Postive |
| TCONS_00091422 | 9.70363 | 25.2372 | -1.378955409 | 0.00065227 | gga-miR-24-3p   | 18037.72   | 29569.61  | -0.703531782 | 0         | -27.7 | 649   | Postive |
| TCONS_00091422 | 9.70363 | 25.2372 | -1.378955409 | 0.00065227 | gga-miR-130c-3p | 95061.7    | 101023.35 | -0.078186239 | 1.45E-32  | -25   | 2906  | Postive |
| TCONS_00091453 | 51.3785 | 10.6376 | 2.271992077  | 0.00065227 | gga-miR-22-3p   | 6060606.31 | 5856904.5 | 0.058890194  | 0         | -24.9 | 1404  | Postive |
| TCONS_00092559 | 10.2362 | 44.4051 | -2.117045141 | 0.00065227 | gga-miR-34a-5p  | 3063.87    | 4134.98   | -0.422958824 | 1.67E-34  | -26.2 | 2595  | Postive |
| TCONS_00092559 | 10.2362 | 44.4051 | -2.117045141 | 0.00065227 | gga-miR-183-5p  | 1050.08    | 1257.76   | -0.250790974 | 6.63E-05  | -25.4 | 385   | Postive |
| TCONS_00092559 | 10.2362 | 44.4051 | -2.117045141 | 0.00065227 | gga-miR-16-5p   | 56158.77   | 85642.55  | -0.599249972 | 0         | -25.7 | 1893  | Postive |

|                |         |         |              |            |                 |            |           |              |           |       |      |         |
|----------------|---------|---------|--------------|------------|-----------------|------------|-----------|--------------|-----------|-------|------|---------|
| TCONS_00092802 | 0       | 101.693 | -5           | 0.00065227 | gga-miR-455-5p  | 2386.54    | 2712.81   | -0.175301048 | 3.23E-05  | -25.8 | 249  | Postive |
| TCONS_00093337 | 314.978 | 102.785 | 1.615621326  | 0.00065227 | gga-miR-148a-3p | 1311848.77 | 1183894.4 | 0.157627517  | 0         | -28.8 | 457  | Postive |
| TCONS_00098001 | 10.2772 | 27.9447 | -1.443127428 | 0.00065227 | gga-miR-16-5p   | 56158.77   | 85642.55  | -0.599249972 | 0         | -23.8 | 1760 | Postive |
| TCONS_00098001 | 10.2772 | 27.9447 | -1.443127428 | 0.00065227 | gga-miR-15b-5p  | 52240.3    | 54724.75  | -0.057463834 | 2.08E-10  | -26.6 | 1755 | Postive |
| TCONS_00098001 | 10.2772 | 27.9447 | -1.443127428 | 0.00065227 | gga-miR-15a     | 66127.71   | 71018.04  | -0.09336416  | 1.80E-32  | -24.1 | 1755 | Postive |
| TCONS_00098001 | 10.2772 | 27.9447 | -1.443127428 | 0.00065227 | gga-miR-15c-5p  | 78633.19   | 83587.39  | -0.078580488 | 2.09E-27  | -24.8 | 1755 | Postive |
| TCONS_00098189 | 41.3761 | 17.2955 | 1.258400945  | 0.00065227 | gga-miR-22-3p   | 6060606.31 | 5856904.5 | 0.058890194  | 0         | -26.2 | 5555 | Postive |
| TCONS_00098189 | 41.3761 | 17.2955 | 1.258400945  | 0.00065227 | gga-miR-199-5p  | 157089.1   | 112030.78 | 0.497254361  | 0         | -26.2 | 4911 | Postive |
| TCONS_00098190 | 63.9259 | 21.6184 | 1.564140815  | 0.00065227 | gga-miR-489-3p  | 6582.31    | 3822.59   | 0.793609947  | 3.09E-166 | -26.1 | 80   | Postive |
| TCONS_00098190 | 63.9259 | 21.6184 | 1.564140815  | 0.00065227 | gga-miR-22-3p   | 6060606.31 | 5856904.5 | 0.058890194  | 0         | -25.4 | 2893 | Postive |
| TCONS_00098190 | 63.9259 | 21.6184 | 1.564140815  | 0.00065227 | gga-miR-101-3p  | 474140.24  | 401158.63 | 0.250707448  | 0         | -23.5 | 1712 | Postive |
| TCONS_00098715 | 21.3889 | 6.10353 | 1.809146511  | 0.00065227 | gga-miR-29c-3p  | 11632.69   | 9782.55   | 0.25946871   | 9.25E-39  | -21.8 | 1628 | Postive |
| TCONS_00098715 | 21.3889 | 6.10353 | 1.809146511  | 0.00065227 | gga-miR-29a-3p  | 11632.69   | 9782.55   | 0.25946871   | 9.25E-39  | -22.4 | 2357 | Postive |
| TCONS_00099988 | 48.8302 | 22.2197 | 1.135934349  | 0.00065227 | gga-miR-489-3p  | 6582.31    | 3822.59   | 0.793609947  | 3.09E-166 | -33.9 | 553  | Postive |
| TCONS_00099995 | 18.9931 | 8.20594 | 1.210734887  | 0.00065227 | gga-miR-22-3p   | 6060606.31 | 5856904.5 | 0.058890194  | 0         | -27.3 | 5152 | Postive |
| TCONS_00099995 | 18.9931 | 8.20594 | 1.210734887  | 0.00065227 | gga-miR-101-3p  | 474140.24  | 401158.63 | 0.250707448  | 0         | -24.9 | 418  | Postive |
| TCONS_00100715 | 8.14788 | 16.8193 | -1.045621026 | 0.00065227 | gga-miR-499-5p  | 3477.53    | 4200.74   | -0.263014091 | 5.47E-15  | -22.1 | 2012 | Postive |
| TCONS_00100715 | 8.14788 | 16.8193 | -1.045621026 | 0.00065227 | gga-miR-26a-5p  | 5512392.3  | 5684205.5 | -0.034713704 | 0         | -24.8 | 1911 | Postive |
| TCONS_00100717 | 7.29788 | 19.4095 | -1.41121362  | 0.00065227 | gga-miR-19a-3p  | 59718.13   | 75391.42  | -0.326664913 | 0         | -21.2 | 1505 | Postive |
| TCONS_00100717 | 7.29788 | 19.4095 | -1.41121362  | 0.00065227 | gga-miR-128-3p  | 99089.28   | 110172.91 | -0.143402193 | 1.43E-113 | -24.6 | 962  | Postive |
| TCONS_00100717 | 7.29788 | 19.4095 | -1.41121362  | 0.00065227 | gga-miR-30a-3p  | 5516178.95 | 6501640.5 | -0.227568083 | 0         | -26.6 | 1902 | Postive |
| TCONS_00101056 | 21.843  | 8.7259  | 1.32379517   | 0.00065227 | gga-miR-181a-5p | 2087579.9  | 1996273.7 | 0.074088345  | 0         | -24.4 | 2838 | Postive |
| TCONS_00102021 | 106.051 | 49.9454 | 1.086334509  | 0.00065227 | gga-miR-489-3p  | 6582.31    | 3822.59   | 0.793609947  | 3.09E-166 | -28.8 | 3214 | Postive |
| TCONS_00102021 | 106.051 | 49.9454 | 1.086334509  | 0.00065227 | gga-let-7j-5p   | 1933522.85 | 1763522.9 | 0.142337939  | 0         | -27   | 1244 | Postive |
| TCONS_00102021 | 106.051 | 49.9454 | 1.086334509  | 0.00065227 | gga-let-7f-5p   | 1810554.5  | 1701629.8 | 0.099080869  | 0         | -23.6 | 1255 | Postive |
| TCONS_00102021 | 106.051 | 49.9454 | 1.086334509  | 0.00065227 | gga-let-7c-5p   | 1103087.6  | 913460.21 | 0.281700016  | 0         | -26.7 | 1244 | Postive |
| TCONS_00102021 | 106.051 | 49.9454 | 1.086334509  | 0.00065227 | gga-miR-218-5p  | 6523.22    | 3337.58   | 0.97634831   | 1.72E-233 | -21.9 | 3553 | Postive |
| TCONS_00102021 | 106.051 | 49.9454 | 1.086334509  | 0.00065227 | gga-let-7b-5p   | 372600.78  | 329030.81 | 0.188974455  | 0         | -26.8 | 1244 | Postive |
| TCONS_00102729 | 21.1136 | 7.43025 | 1.50668993   | 0.00065227 | gga-miR-205a    | 4900.37    | 2137.36   | 1.206627201  | 2.97E-247 | -25.6 | 2063 | Postive |
| TCONS_00102850 | 22.8321 | 9.77165 | 1.224389463  | 0.00065227 | gga-let-7j-5p   | 1933522.85 | 1763522.9 | 0.142337939  | 0         | -23   | 2346 | Postive |
| TCONS_00102850 | 22.8321 | 9.77165 | 1.224389463  | 0.00065227 | gga-let-7g-5p   | 161712.18  | 156890.77 | 0.053234308  | 7.39E-25  | -22.7 | 2347 | Postive |
| TCONS_00102850 | 22.8321 | 9.77165 | 1.224389463  | 0.00065227 | gga-let-7f-5p   | 1810554.5  | 1701629.8 | 0.099080869  | 0         | -22.4 | 2346 | Postive |
| TCONS_00104873 | 72.252  | 27.7886 | 1.37854437   | 0.00065227 | gga-miR-22-3p   | 6060606.31 | 5856904.5 | 0.058890194  | 0         | -25.6 | 1886 | Postive |
| TCONS_00105002 | 34.5337 | 13.1577 | 1.392097591  | 0.00065227 | gga-miR-29c-3p  | 11632.69   | 9782.55   | 0.25946871   | 9.25E-39  | -21.2 | 2957 | Postive |
| TCONS_00105002 | 34.5337 | 13.1577 | 1.392097591  | 0.00065227 | gga-miR-29a-3p  | 11632.69   | 9782.55   | 0.25946871   | 9.25E-39  | -21.3 | 2957 | Postive |
| TCONS_00105769 | 527.599 | 85.8592 | 2.619397195  | 0.00065227 | gga-miR-199-5p  | 157089.1   | 112030.78 | 0.497254361  | 0         | -20.9 | 360  | Postive |
| TCONS_00106010 | 53.3725 | 22.0086 | 1.278029213  | 0.00065227 | gga-miR-205a    | 4900.37    | 2137.36   | 1.206627201  | 2.97E-247 | -26.3 | 49   | Postive |
| TCONS_00106010 | 53.3725 | 22.0086 | 1.278029213  | 0.00065227 | gga-miR-125b-5p | 404462.27  | 285609.43 | 0.511527957  | 0         | -27.4 | 1843 | Postive |
| TCONS_00107235 | 16.1492 | 7.22613 | 1.160167584  | 0.00065227 | gga-miR-218-5p  | 6523.22    | 3337.58   | 0.97634831   | 1.72E-233 | -25.3 | 2514 | Postive |
| TCONS_00107235 | 16.1492 | 7.22613 | 1.160167584  | 0.00065227 | gga-miR-155     | 5204.94    | 1759.22   | 1.574512065  | 0         | -24.1 | 3097 | Postive |
| TCONS_00107444 | 24.4142 | 6.54715 | 1.898781567  | 0.00065227 | gga-miR-29c-3p  | 11632.69   | 9782.55   | 0.25946871   | 9.25E-39  | -20.8 | 1235 | Postive |
| TCONS_00107444 | 24.4142 | 6.54715 | 1.898781567  | 0.00065227 | gga-miR-29a-3p  | 11632.69   | 9782.55   | 0.25946871   | 9.25E-39  | -20.9 | 1235 | Postive |
| TCONS_00107450 | 113.261 | 23.0323 | 2.297920782  | 0.00065227 | gga-miR-125b-5p | 404462.27  | 285609.43 | 0.511527957  | 0         | -28.8 | 485  | Postive |
| TCONS_00108098 | 33.6891 | 11.8126 | 1.511955345  | 0.00065227 | gga-miR-22-3p   | 6060606.31 | 5856904.5 | 0.058890194  | 0         | -29.6 | 1743 | Postive |
| TCONS_00108098 | 33.6891 | 11.8126 | 1.511955345  | 0.00065227 | gga-miR-218-5p  | 6523.22    | 3337.58   | 0.97634831   | 1.72E-233 | -20.8 | 2947 | Postive |
| TCONS_00112672 | 126.588 | 50.5031 | 1.325696798  | 0.00065227 | gga-miR-489-3p  | 6582.31    | 3822.59   | 0.793609947  | 3.09E-166 | -23   | 263  | Postive |
| TCONS_00112894 | 24.0587 | 0       | 5            | 0.00065227 | gga-miR-155     | 5204.94    | 1759.22   | 1.574512065  | 0         | -21.3 | 94   | Postive |

<sup>a</sup>The correlation expression patterns between miRNAs and their target lncRNAs.

**Table S6. Summary of the represented networks generated by IPA analysis.**

| Network | Molecules in networks <sup>a</sup>                                                                                                                                                                                                                                                                                                                                                                                              | Score | Focus genes | Top functions                                                                                    |
|---------|---------------------------------------------------------------------------------------------------------------------------------------------------------------------------------------------------------------------------------------------------------------------------------------------------------------------------------------------------------------------------------------------------------------------------------|-------|-------------|--------------------------------------------------------------------------------------------------|
| 1       | <i>C4orf32, DCAKD, DESI2, ELAVL1, <b>FAM13B</b>, <b>FAM78A</b>, FOPNL, GDPGP1, <b>HNRNPA3</b>, <b>HNRNPH3</b>, <b>IRF2BP2</b>, <b>KDELC2</b>, KIAA2013, LRRC37B, <b>MEX3D</b>, OR6T1, <b>OTUD1</b>, <b>RBFOX2</b>, <b>RBM24</b>, RNF212, <b>SCYL3</b>, SLC18B1, <b>SLC25A25</b>, SLC41A1, <b>SMCR8</b>, <b>SUMO1</b>, <b>SYDE2</b>, <b>TMCC1</b>, UBC, <b>VAPB</b>, VSIG10, ZFAND1, ZNF362, ZNF529, ZSWIM1</i>                  | 32    | 16          | Post-Translational Modification, Hereditary Disorder, Neurological Disease                       |
| 2       | <i>26s Proteasome, <b>AFAP1</b>, <b>APP</b>, <b>ATRX</b>, Calmodulin, caspase, Ck2, <b>CKAP4</b>, <b>EIF4E3</b>, <b>FAM133B</b>, <b>FZD8</b>, <b>GNB1</b>, GNRH, <b>GOLGA4</b>, GPR61, GPR78, Histone h3, Hsp90, <b>HSPA8</b>, Insulin, LRRTM3, Mapk, Mmp, NECAB1, NMDA Receptor, Pka, Pkc(s), <b>PURA</b>, <b>RAB40B</b>, <b>SRSF2</b>, <b>SSBP3</b>, TAAR5, <b>TPPP</b>, <b>VASH2</b>, Vegf</i>                               | 30    | 16          | Cell Cycle, Cancer, Hematological Disease                                                        |
| 3       | <i>ADCY, <b>ADCY9</b>, <b>ADM</b>, ADRB, Akt, AMPK, <b>BHLHE40</b>, Calcineurin A, Calcineurin proteins, CaMKII, <b>CCNLI</b>, Cg, Creb, <b>DUSP8</b>, <b>EEF2</b>, <b>FBXO32</b>, <b>FOXO3</b>, FSH, glutathione peroxidase, <b>GMFB</b>, <b>IRS1</b>, <b>KLF10</b>, Lh, <b>LINGO1</b>, MAP2K1/2, Mlc, <b>MNI</b>, PDGF BB, <b>PGP</b>, PP2A, PRKAA, Proinsulin, PTPase, <b>SEM7A</b>, <b>SESNI</b></i>                        | 29    | 16          | Cellular Compromise, Organismal Injury and Abnormalities, <b>Skeletal and Muscular Disorders</b> |
| 4       | <i>14-3-3, <b>CDKN1B</b>, ERK1/2, Foxo, <b>FOXO1</b>, HDL-cholesterol, <b>INSIG1</b>, <b>IRS2</b>, <b>ITGA6</b>, JINK1/2, LRP, Mek, <b>NCOA1</b>, Pdgf (complex), PEPCK, PI3K (family), <b>PMEPA1</b>, <b>PNRC1</b>, <b>PNRC2</b>, Raf, Rap1, <b>RAP1B</b>, Rar, <b>ROCK1</b>, Rxr, <b>RXRA</b>, Secretase gamma, Smad, Sos, <b>TGIF1</b>, thymidine kinase, thyroid hormone receptor, <b>TRIB1</b>, TSH, VitaminD3-VDR-RXR</i> | 26    | 14          | Lipid Metabolism, Molecular Transport, Small Molecule Biochemistry                               |

<sup>a</sup>. MiRNA-mRNA interaction network genes are in boldface.

## Table S7

The full length sequences of *lncIRS1* and *IRS1*. Coordinates are listed according to the Gallus\_gallus-5.0 reference Annotation Release 103. 5'RACE sequence was highlighted with blue, while 3' RACE sequence with yellow.

### (1) The full length sequence of *lncIRS1*

Gallus\_gallus-5.0 (chr5: 8,080,605-8,085,228)

```
ATGGTGAGGAAAACAGAGAGAAGAGTTGGCAGGAGCCACTGCGGGCAAAGTGAAGGACAGGAAAACGT
TTCTAGCTTGATGCAAGCTTGTGCTGCACATTCATGCACACACAACCTGTGTGCAGCAGGCCTGTGCTTCC
CCTGCCTTTTCACCGCGGAAGGGAGAGCTTCCCCAGTCTTAACACTTTCCTCTTCCAACACTGCAAAGCCAT
GATTGAGGCTGTTCTGATTGGCATGAAACCTTCTCTCAAAAACCTTCCAAAATGCTCCCATCACATCCCTGT
AGAGCTGTGGTGCAGCATCTCAGCAGACATTCGCTCACCAGCAGAGCATTCTCTTTTGTGTGCAGAGGTC
GTGTTCTCAAAAAAGCCAGTTTGTGGTTGGGAAGGCCAGATGACAAGGGAGATTCTGGTTACTGGTTTTT
TGGCTTGCTGGAAACACCATGTTTTTTGTTTTGTTTTCTTTTTTTTTGGCATGGAGACTGTGTTGATAGA
TGACAGAGAAGAAAATGGTCTAAAAGGAGATGCAGCTTATGGAAAACCTACGTGCTTCTTCAGAGGAACC
AGCAATATTTACTGCAGTATCGTACACAACCTACTAGAAATAATGCTCTGAAGTCCAAAAGTCTAAGTTGAA
TGGAGTAACTCTTAACAACAATAGGCTTCTGTTTTGTATTGTCTCAAAAACCTGAGAAGCAATACATAAAC
TGTTTATCTGTATTGGAAAAAAAAAAGCAACAAAAGACAACCAAAAAAACCAACATGTTTGGGGAAAAA
AACTTGAGTTCTTAGAATACTATCATTACTCTTTTTCTCTTCATCATGTAGGTCATGCGGGGAATGAAGTA
GAGACTTGAAAATCTACTCAAGGTGAGTACTGATGTTGAAACCATAACCTATGCTTTTCATAGTGACTATTAA
ACTTCTGGGTACACACACCAAAAAAAGTTCATTTGAAATTGTACTGAAGTACTTCAGCCCAGTATCAAAC
GGACCACAGAAAAGAATTAGAGAGCAGGAAACAGTTTGGAGACAGTTCTCTTATATCAGAAGTGAAGCATT
CATGGGTATTGGTCACTCTGGGTGAGATTTGTAGTAACAATAGGTCTCATGTACAACGTATTAAGTGCATGT
GAGAATTTGTCTGTCCACGCAGCTTCCATGGTATTACAGGAATCTCTGGAGGGCTCCAGCCTTGAGCTGC
AGACTGGGAAGAACAAGGGTTGCATTTGATAACCTGGCCCCTCTACCTCCAGTCAGTGAGGAAAACA
GGAACATCAGATGAGAAAATTTGAGAACTGCTGTTTCATCCCTGGTAGCTACCAAGGAGAAAAGTGAAGATC
CTACTGCAACTTAAAGGAAGGCATTGGAAAAAGGAGAGGAAAAAGTAGAAATTAAGCAATGGTACATATA
CAAACAAACACACAGGAAAACAAACGCTAGCAATCTCGTTGGCATTCTGCAGATGATTTTGAGAGTGGC
AAACCAAACCTCCACTATCAGGATAATTTCACTAATTATCACTAAGTAAATCAGTGTACAGTGCCAGTTCAC
GTCTGCACACGAAACCCTCAGCACAGTACAGCAACAATGAAGTTGACATACGTGAGTCATTAATGAAAA
TGACTAACTTTTGACAGTAATAACTGCAGAGTGCTTGTGAGCAGCATTGAGGCAACACGCTCCAAAGTTT
CTGGAGCTTAGTCGCTCTACTGGAGAGGGAGAAAACCACTAATTTGAATTCAACTTGCAGCGCTTTAAGT
CCTTCTTAGTATCTTAGTGCTGTTTCTAATGCTTGAGAACAAGTTCCTCAGAGAGACTGGAAAGGAATTA
TTCTTAGCATTTCAATACCACTAATCCTGATTTTCAATACAGCCCTAATTTACCAGGAGTAAATCTGTTA
TTAAGCCTTAGTTCAGCATGCAGGATACAATACATTTATTGTTTGCTTAAGGTTAAAAACATCAACAGGAAT
GAATGACTGGATTTTGCAGCATCTATAGAAACCACTCACTTTGGCACTTCATCATCACCAGTAAAAACTACAG
```



TATTTCTGCTGTGCTCTCCCTGCTATGTAAGTCTAAAATCATTACAATAACTGACATTTGCATGTGAAACCGGAT  
GCTTCTGGGCTTTTCAGCTTAGTACTGCTCACATCGGGCACTTCGTTTTTCATGGTGGCCATTTTAAATATAAA  
TATTTATATCTGGAGGAAACACAGCTTTCTGGTAGTTTGGTTTTCTTTGCATGTTTTCTGGAACCTGACATAATA  
TGATTCGGTAACAGCTGAAGCTCTCCCTGCTTTGCTTATGAACTAGTAAAAAACACAAAAGTAGATCTG  
CCTAAAATACTTGTCTTATTGGTGACAACCTGGAAAACATTTCTTAAGATGCACAACCCTAACAGAAATATCA  
ATGAACAGAAAAAAGAGCTGACTTGACAGAACCTGCAAAATAACTTCTCAGGCCAAGTATGGAATT  
CAAAACAGCTCCTACTGAGACACTCTGTGCCTATGAACTTAAAAGTTACTGTACACGCTATCAGCTTGTCTT  
GCCGAAGTCATACGAGACATTTCAAGCAGCCTTCCAACAAGTGCTGCTGTGCTGATTTAACCTGCCACATC  
TGGAATCTCCATAATAAAACATAGCTGGAAGCATGCACACAAGCACACTAGCTTTGCAGTTAATATTTTAG  
ATACATAACCAGGAAACATGAAATCCTACAGATAGATAGTTTTATTTTATCTGTACATAGATAAAGTCTCATT  
TGTGCAATTTAAAGATGAAGATTTAAAAATAATCCTGTTTATTTCTATATGTTGCTGGTCTGCAGTTTCTGGTT  
TACAGCAGGCATACACTAAGACGTTAGTAAAGCAAGATCAGTCCCTTGAGGCAGCAACTTGCAAGTCTGCAT  
TCATGCAAACAGTGTGGCATGGACAAAAGCCAGGATGCTGCACAACGGGCCACATGCATAATGCCATGGA  
TGGAGGCTCAGGCATCCACACCCACTACAGTGGGGTTCAGATAAAGCAGAACCATTCTCTGCCTGCACAA  
GAAGTCTGCCTTGTGAGCATCACTAAAACCCTCAGGACTCATTCTGCAAAGCTCAGGCACAGTACTTCAA  
ATGAACAGCAACGCATATGTTTTCAAGCATGTGGAAGCAGCACACTCAAACCTCTGATCAGAAACACTGA  
CATATTTCTGAAGAATGAGTTGAAAAACAATGGCATCATAACACCTATGCTGTCATAAATGGTAACTCTAA  
ATTTTTGAGTCCAGTGATTAGCCCAATTATTATCTGTGATGGTGCTAACATCATGGAGATAATCCTTTATTTT  
ACACAGATTGTGACTTGTATAGAAGTGCTGCTCATTACCTTTGCTCTCTGGGTTTACCTCATGTTATACTCA  
AAATATACAGCAAAAATACGCAAGTTTTTATTACTACAAAAGATTTAAAGTAGTCAATATATTAGAATGAAGC  
TAAACATCACCTCTAGCAAGTTTTACAATCAACTTTATATTCTGCTATCAATCCTGTTTCATATGGTAAACAC  
CTGCAAAACATCCAAGCTCTGTCCTTCAACATTCATTTCAAAAATCTTTTCCACTACAAAAGAGAAGTGGA  
ACACAATGAAAACCTAGTGGGAGTAGACAGACCATAGGAAGAAGAATTAAGTCTTCTCAATGCACACTGCT  
GCTGCAAGTCGCATGCCAACAGTCATTAGCATAAACTGCTAAAACAAAGGCTGACTTTGTGCAGGGAGCT  
CCAGAAAACCAAGCAGTCTTGAAGCCGTCATAAGCTACCTTATTGAGACAATGAGACTCAGCGATGAGG  
TCCATAATGGTGGGCAGTTCTTCGTTGGAGGCATTTGTAATTTGGATTACCCAGATAGCTGGAGCTTGTGT  
GTCTGACATAGCTCGTAGGCCACACTGATGTAGGAAAGTGGAACTTGGCATCTCACACCATTTGGGGA  
GGTTTTTTCTTTTTCTTTTTTTAATCTGATGCCTACACGCATTAAGCCTCAAATGCATTTATCTAGCAAGAGC  
ATCCCCATGAATACACGTTTACACACAGGCAGAGAGCACCCAAACACACCTGGGTGTTTTACAGATCATTCA  
GGCTGAAATCAGTTAAACCCACGTCTGACAGCCAGCTGGGCTTGCCACATACCCTAGAGCTTTTCATGCTCAT  
GGACTGGAGAAAAATGTGAACAAGTTCACAGCAATGATATTTATCATTAGCAATAATTTACTGATTTCTCA  
TTATGAGTCATTTGCATTAACCTACGTGTGTGCCTGCACTGGATTCCAGAAAGAACCTAAATGGCTAATAAA  
CCAGGAACAGACACACGGATCACTTCACACAGCGGAAGTCATCGGCTTAGTTTCTTACCTAAGAATGATGC  
TTTTCTAAACAGAGCTGATGAGCAGGATGGACAGGTATTTCTCAAGCGGAAGTGCCATCTACAGGGTAGA  
CCATTTTTCCAGGAATTGTTACGGATCAAAATGAGGCAAAAAAAAAAAAAA

## (2) The full length sequence of *IRS1*

Gallus\_gallus-5.0 (chr9: 9,200,378-9,249,527)

GGCTCCGGGGATGGTCCACGCACTGGCGCCGTCACGTGTTGTTCTGCTCGCAGCGAGC  
CTGAGCCGCGGGCGGGCGGAGGGGCCGAGAGCGAAGCGCGGCCCCCGACGCC  
GTTTTGGTGCGGGGCGCCGGGAACTCCGCGGAGAAGCCGGCGGGGAGCGAGTCGC

CGCGCCGTGCCCGCTCCCCGCCAGCCTGGGGCGCGGGAGGGAGACGTGCCGCCG  
GCCGCTGAGGCGCTGCCGCTGGAATGAGGAGGAGGAGGAAGAGGGGATGTTTCGTGC  
CGCGCTCGGGCTGCCTCCCCTCTGCCGCCCGGGTCGCGTTCGCGTGAAAATGGC  
ACTTTCTCTGCCTAACGAGATGGGACTGAATGGGGTCGCCAGCCTTCTCCGCGCGCC  
GAGCGGGAGCAGCAGCAGCAGCCGCGGCGCTGAGCCTGGGGGGCGGCTGTGCCGTG  
CCGTGCCGTGCCGTGCCGCGCTGCGCTGTGTGCGGGGGCTTTTCTGTTGGTTTCTTTT  
CTTTTTTTTCTAATTATTGGGAGGGGGGAAGAAGCGTGCTCTTTTTTTTTTTTTTTT  
TTTGGGTGCAAACCCGGACTTTGCAAAACAATCTCCGCCCCGAGAGGATATTTAAT  
CTACAACAAGAAATCGCAGCTCGCGGAGGTAAAGTTGAGAGAGGAAAGGCTGCCGGA  
CACCGTGCCCGTGGGGACCCGAGCCCCGCGGACCGAGGATGCGATTCTCCCTCCCG  
CGGCTGCCTCCGGGACGCGGCTTTCGCCAGGGCTGAGCGAGAGCGGACTGTAACCTAT  
TAAGACGCGCTACCCACGTAGGGGCGATTGGGGCATAAACAGCGACACGAACCTCCG  
GCTGGTGCCGGAGGCTGCCTCTGCTGCCGAACAGCTGCTCGCCCCGTGCTCCTGTCC  
CTCCCCGTCCCTTTTTCAGGAGGGGATCCTGAGCTTATTTTCTTTTTTTTTTATATATA  
TATATTATTTAAATTGTTGCATGCATTTTATTTTGGGTGGTTGTTGACTTTTGCAACTGG  
CTCAGCTGTTTTGGGGTCTTGTGGACTGCTGACGGCGGTAGCAGCAGCACTGCCTCTC  
GCCATGGCCAGCCCCACAGATAACAACGAGGGCTTCTTCTCGGATGTCAGAAAGGTGG  
GTTACTTGCGCAAACCCAAGAGCATGCATAAGCGCTTTTTCTGTGCTAAGGGCAGCCAG  
CGAGTCTGGACCCGCCGGCTGGAGTATTATGAGAATGAGAAGAAATGGAGACACAA  
GTCGGGGGGCCCCAAGCGCTCCATCCATTGGAAAGCTGCTTCAACATCAACAAGCGG  
GCTGACTCCAAGAACAAGCACCTGGTGGCCCTCTACACCAAGGACGAGCACTTTGCC  
ATCGCAGCTGACAGTGAACCTGGAACAAGAGAGCTGGTACCAAGCGCTGCTGCAGTTG  
CACAACAGGGCCAAGGGCCACCACCCTCCACCACCACCACCATCACCACCACAGC  
GATGTCACCTTCGGGGGACGAGCGTGGGGCTGGGGGAAGCAGGTGAGGACAGCTAT  
GGCGAGGTAGCCCCTGGTCCGGCTTTTAAGGAAGTTTGGCAAGTAATTCTGAAGCCTA  
AGGGGCTAGGCCAGACAAAGAACCTGATTGGCATCTACCGCCTGTGCCTGACTAACA  
GACCATCAGCTTTGTGAAGCTGAATTCGGATGCGGCTGCTGTGGTGCTGCAGCTGCTC  
AATATCCGCCGCTGCGGACACTCCGAGAACTTCTTCTTCATCGAGGTGGGACGCTCGG  
CGGTGACCGGGCCTGGGGAGTTCTGGATGCAGGTGGACGACTCGGTGGTGGCGCAGA  
ACATGCATGAAACCATCTGGAGGCCATGCGAGCCATGAGCGAGGAATCCGACCCCG  
CAGCAAGAGCCAGTCTCTCCAATGTTCCAATCCCATCTCCGTGCCCTTCGTAGCA  
GGCACCACATCAACAACCCTCCGCCAGCCAAGTGGGGCTCAGTCGCCGGTCCAGGA  
CTGAGAGTGTTACAGCCACCTCCCCAGCTGGCGGTGGGGGCGGAGGTATGGGTGGCA  
AACCCAGCTCTTCCGGGTCCGCGCATCCAGCGATGGGGAAGGCACCATGTCAAGGCC  
TGCCTCGGTGGATGGTAGCCCTGTTAGCCCCAGTGCCAACCGAACCCACTCGCACAGA  
CACCGTGGCAACTCCAGGCTCCATCTCCGCTCAACCACAGCCGTTCCATCCCGATGC  
CTTCTCACGCTGCTCCCCGTACGCCACCAGCCAGTCAGCCTGTCGTCCAGCAGCAC  
CAGTGGCCACGGCTCCACGTCAGACTGCCTGTTTCCACGAAGGTCCAGTGCTTCGGTT  
TCTGGCTCCCCTAGTGATGGCGGATTTATTTCTTCTGATGAATATGGTTCTAGCCCATGT  
GACTTCCGCAGCTCTTTTCGCAGCGTGACCCCGGATTTCGCTAGGACACACCCACCAG  
CTCGGGGCGATGAAGAGCTCAACTACATCTGCATGGGGGGGAAGGCCGCCTCGTCTG  
CTGCAGCCTGGCAGCTCCCAATGGCCACTTCATCCACGCACCTGCCACCCGCAGCAG  
CAGCCCCGCTACCCAGCACGTCGTGCTGTCCCCGAGCCGGTAGCGAGGACGTTGCTG  
ACTTGGACAAGGCATTCAGGAAACGGACTCACTCTGCAGGCACTTCGCCACCATCTC

CCACCAGAAGACGCCTTCCCAGTCTTCGGTGGCCTCCATTGAGGAGTATACGGAGATG  
TTGCCTTCTTACCCCTGCGGCGGCAGCCGGCTGCCCTCCTACCGGCACTCGGCCTTCGT  
GCCACTCACTCCTACCCTGAGGAGTGTCTGGAGATGCACCACCTGGATGGCAGCCAT  
CATCGGACCAACTCCGCTCCGCACACAGATGATGGCTACATGCCCATGTCCCCGGTGT  
TGCCCCCTTGCCCAGCGGTGGGGCTGCCCCAAGGGCGGTGACTACATGCCCATGAGC  
CCCAAGAGCGTGTTCGGCCCCGCAGCAGATCATCAACCCTGGCAGAGGGGGCCGCCAC  
CCTCCAGCCACGGTGGACTCCAACGGCTACATGATGATGTCCCCTAGCGGCAGCTACT  
CCCCGGACAGCGGCTCTGCGGGCTACGGCAAGATCTGGACGAACGGTGC CGGCCACC  
ACCCGAAGCTCTCGGTGGAGAGCAACGAAGGAAGCTGCCCTGCGGCGGCGGCGACT  
ATATCAACATGTCCCCGGCCAGCGGCTCCACCACCAGCACGCCGCCCGACTGCTACTT  
CGGGGCGGCGGGCAGCCGGGCGTTCGAGGAGGCGGCCGCGGCCCTCCACAAGCCCA  
TCTACTCCTACTTCTCGCTGCCGCGCTCCTTCAAGCACGTGCACCGGCGGGGCGGCGG  
GCCGGCGGGCGAGGAGGGCAGTCCCCAGCCCCGCGTGGCGCTCGGCTCCGGCCGCCT  
CCTTACGCCGCCGAGGACTCGTCCTCCTCAACCAGCAGCGACAGCCTGGGCGGCCCC  
GGCGGCCCGAGGGTCCCGCGTCGCACTCGCAGCCCCCGCGCAAGGTGGACACGGCC  
GTGCAGACCAAAGGCCGCTGGCGGACCCACGCGGCTGTTCGCTGGGCGGCCCAAG  
GCCAGCACCTGCCGCGGGCCCGGAGCAGCCCCGCTGCTGCTGCCCCGGAGCCC  
AAGAGCCCCGGCGAGTACGTGAACATCGAGTTCGTCCCCGGGGACAAGCCGCCTTTC  
CCCTCGGCCGCGCCGGGGCTGCCACGGCCGCCGGGCGGGGAGGCCGCCGAGGAGTAC  
ATGAACATGGAGCTGGGGCCGCCCGCGCCCGCTGCCCGGCGCCTTCGCCGCCGCCG  
CCGCACGGCCGGGTCGCGGCGCGGCTCCCCCGGACGGGACTACGTGAGCATGCAGC  
TGGGGGGCTCCTGCTCGGACTGCGCCGACAGCCCCTCGCCCTCCTCGCCCGCCCCGCT  
GCTCGGCTACGCCGACGTGCGGGCGGGCCGCTCCGCCGCCGAGAAGCCGCCGCCGGC  
CGCCGCAGCTTCCCCGAGCTGCCGCGGCCCCCGGCCGAGCTGGCGGGCGGCCCGCC  
GCGCTCCTCCTCCTGCTCGGGGGCCCCGCGCGGGCAGCGCCTTACCCGCGTCAGC  
CTCAGCCCCGGCCGTAACCAGAGCGCCAAGGTGATCCGCGCCGACCCGCAGGGCGGC  
CGCCGGCGGCACAGCTCCGAGACTTCTCGTCCACGCCGAGCGCCGCCCGCGGGGCG  
GCAGGCGGCGGCGGCGGCGGCGGCCCGGGGCGCCCTTCCCCTGCGGGCGGCGCG  
GGGGGCGCCGAGGAGGTGAAGCGCCACAGCTCGGCCTCCTTCGAGAACGTGTGGCTG  
CGCCCCGCCGCCGGGAGCCGCCCTCCGCGAGTCGGGGGCCGGGGGCCGCGCTGGA  
GAACGGACTCAACTACATCGACTGACCTAGTGAGGATTGCAGGCACCGCGCCACCACC  
TGCACCCCCCGCGGAGGGCGCTTCGGCCCGGGGGGAAACCGCGCAGCCCGCTCCCCG  
CGCGGGAGCAGCACTCCAGCGACGACCTGAGCGCGTACGCCAGCATCAGCTTCCAGA  
AGCGGGAGGAGCCCTAGGAGCCGCCCGGGAAGAATGATGACCTATAACAACCTCAGC  
AAATCCTTTTTTAACTCATGGGTATCAAGACTCTAAATGTTTTTCATGTTACCACA  
ACTAGGACCTCACCTCCTCCTCCTCCTCCTCTGTAATGGGTACGATGCATCCAGTTCAGTT  
TGTTTACTTTACACAAACCTCAGGAGTTAGTTGACTGAGCTGCACATCCTGTGTTGTGC  
CAAGCAGAAGCACTGTGACACCTGGACTATGAGTCTCTCACTTAATCCTCTACCGTAA  
GGACTTAGCTGGCCACAATGAACTGATGTGCCACCCTGTGTCATGGTGAGAATGGG  
TATTTTACTAGCACATTTACACAACCTTCATTTGCTGCTGAAAACCTGTATGACAAATCAT  
CCTTGTAATTTATTACATAAAAATTAATGTTGGTTGAAGAGTATTAATATTTAACATA  
GGTTTTGATTTATACATGTACTTTTTTTAATAAAATGTAACTTTTCTACAGCACATCTT  
TTTTGATGTGGAACCTGAGGTATACTATTTTTGTTGTAACAGAGTGGGAAACCTGCTT  
AAAACAAGGCTTCTAAGAATAGAGTAGGGTACTATTCTTGTTTAAGATTGTAATTCAG

AAAATAATATAATACAAGTCATTGGTCCCCGGGCCTTGATTGTACAGTCATATTTGCTGA  
TACTATCAGTTGTAAGATAACCCTGATGCTGAGCTGATTTCTTCCAGAAGAAAAGTAA  
TTTTGTACTCCTTGTAATAATAATCTGTATTA ACTACAATGAAGACAACTTTTCTGT  
ACATGGTATTTACAAGTGTCAACTTGAATTCATCAATTGCACAGAACTGAAAAAAAA  
AAAAAAAAAAAAAAAA

**Table S8. Primers**

| <b>Target</b>            | <b>Primer</b> | <b>Sequence (5'-3')</b>                  | <b>Application</b>                                   |
|--------------------------|---------------|------------------------------------------|------------------------------------------------------|
| <i>IRS1</i>              | Forward       | CCCAAGCTTGCCACCATGGCCAGCCCCACAGATAACAACG | Clone of the CDs of <i>IRS1</i>                      |
|                          | Reverse       | CGGGGTACCCTAGGGCTCCTCCCGCTTCTGGAAG       |                                                      |
| <i>LncIRS1</i>           | Forward       | CGCGGATCCATGGTGAGGAAAACAGAGAGAAGAG       | Clone of the full length of <i>LncIRS1</i>           |
|                          | Reverse       | CCGCTCGAGTTTTTTTTTTTTTGCCTCATTTTG        |                                                      |
| <i>IRS1</i> -3'UTR       | Forward       | CCGCTCGAGTGGGTACGATGCATCCAGTT            | Clone of the 3'UTR of <i>IRS1</i>                    |
|                          | Reverse       | CTAGTCTAGACCGGGACCAATGACTTGTA            |                                                      |
| Site 1 of <i>LncIRS1</i> | Forward       | CCGCTCGAGTCTACTGAGACACTCTGTGCCTAT        | Clone miR-15 family binding site 1 of <i>LncIRS1</i> |
|                          | Reverse       | CTAGTCTAGAATGCCTGAGCCTCCATCC             |                                                      |
| Site 2 of <i>LncIRS1</i> | Forward       | CCGCTCGAGACAAATGGCATCATAACAC             | Clone miR-15 family binding site 2 of <i>LncIRS1</i> |
|                          | Reverse       | CTAGTCTAGAGGTCTGTCTACTCCCCTAA            |                                                      |
| Site 3 of <i>LncIRS1</i> | Forward       | CCGCTCGAGTCTGCTATCAATTCCTGT              | Clone miR-15 family binding site 3 of <i>LncIRS1</i> |
|                          | Reverse       | CTAGTCTAGAAAGAACTGCCACCATTA              |                                                      |
| <i>LncIRS1</i> -ORF1     | Forward       | GGGGGTCTCTAGTGATGGTGAGGAAAACAGAGAGAA     | Clone the potential ORF 1 of <i>LncIRS1</i>          |
|                          | Reverse       | GCCGGGTCTCGTGGGTCATCTGGCCTCCCAACCACA     |                                                      |
| <i>LncIRS1</i> -ORF2     | Forward       | GGGGGTCTCTAGTGATGAAACCTTCTCCTCAAAAAC     | Clone the potential ORF 2 of <i>LncIRS1</i>          |
|                          | Reverse       | GCCGGGTCTCGTGGGTCATCTATCAACACAGTCTCCA    |                                                      |
| <i>LncIRS1</i> -ORF3     | Forward       | GGGGGTCTCTAGTGATGTACAACGTATTAAGTGCAT     | Clone the potential ORF 3 of <i>LncIRS1</i>          |
|                          | Reverse       | GCCGGGTCTCGTGGGTTAAGTTGCAGTAGGATCTTCA    |                                                      |
| <i>LncIRS1</i> -ORF4     | Forward       | GGGGGTCTCTAGTGATGGAATTCAAAACAGCTCCTA     | Clone the potential ORF 4 of <i>LncIRS1</i>          |
|                          | Reverse       | GCCGGGTCTCGTGGGTTATGTATCTAAAATATTAAC     |                                                      |
| <i>LncIRS1</i> -ORF5     | Forward       | GGGGGTCTCTAGTGATGCACACTGCTGCTGCAAGTC     | Clone the potential ORF 5 of <i>LncIRS1</i>          |
|                          | Reverse       | GCCGGGTCTCGTGGGCTATCTGGGTGAATCCAAATTA    |                                                      |
| <i>LncIRS1</i> -ORF6     | Forward       | GGGGGTCTCTAGTGATGACAAGGGAGATTCTGGTTA     | Clone the potential ORF 6 of <i>LncIRS1</i>          |
|                          | Reverse       | GCCGGGTCTCGTGGGCTAGTGAGTTGTGTACGATACT    |                                                      |
| <i>LncIRS1</i> -ORF7     | Forward       | GGGGGTCTCTAGTGATGAGTCATTTGCAATTAAC       | Clone the potential ORF 7 of <i>LncIRS1</i>          |
|                          | Reverse       | GCCGGGTCTCGTGGGCTACCCTGTAGATGGCACTTCC    |                                                      |
| Q-IRS1                   | Forward       | CTACCGCCTGTGCCTGACTAAC                   | qPCR                                                 |
|                          | Reverse       | CGTCCCACCTCGATGAAGAAG                    |                                                      |

|                       |                            |                                                   |                       |
|-----------------------|----------------------------|---------------------------------------------------|-----------------------|
| Q- LncIRS1            | Forward                    | CTACTGAGACACTCTGTGCCTAT                           | qPCR                  |
|                       | Reverse                    | ATTCCAGATGTGGCAGGT                                |                       |
| Q- $\beta$ -actin     | Forward                    | GATATTGCTGCGCTCGTTG                               | qPCR                  |
|                       | Reverse                    | TTCAGGGTCAGGATACCTCTTT                            |                       |
| <i>MyoG</i>           | Forward                    | CGGAGGCTGAAGAAGGTGAA                              | qPCR                  |
|                       | Reverse                    | CGGTCCTCTGCCTGGTCAT                               |                       |
| <i>MyHC</i>           | Forward                    | CTCCTCACGCTTTGGTAA                                | qPCR                  |
|                       | Reverse                    | TGATAGTCGTATGGGTTGGT                              |                       |
| <i>MyOD</i>           | Forward                    | GCTACTACACGGAATCACCAAAT                           | qPCR                  |
|                       | Reverse                    | CTGGGCTCCACTGTCACTCA                              |                       |
| <i>Myomaker</i>       | Forward                    | TGGGTGTCCCTGATGGC                                 | qPCR                  |
|                       | Reverse                    | CCCGATGGGTCCTGAGTAG                               |                       |
| <i>IGF1</i>           | Forward                    | AGCTGGTTGATGCTCTTCAGTTCGT                         | qPCR                  |
|                       | Reverse                    | TCCTCAGGTCACAACCTCTGGAAGC                         |                       |
| <i>IGF1R</i>          | Forward                    | TTCAGGAACCAAAGGGCGA                               | qPCR                  |
|                       | Reverse                    | TGTAATCTGGAGGGCGATACC                             |                       |
| <i>IGF2R</i>          | Forward                    | CGTGGGAAGCAATTGATACAGA                            | qPCR                  |
|                       | Reverse                    | GCCTTGCTGGGAACATTTACTT                            |                       |
| <i>Atrogin-1</i>      | Forward                    | TCAACGGGTCGGCAAGTCT                               | qPCR                  |
|                       | Reverse                    | TCCCTCCCATCGCTCAGTC                               |                       |
| <i>MuRF1</i>          | Forward                    | GGCAGCAGCATCATCTCGG                               | qPCR                  |
|                       | Reverse                    | CCTCGCAGGTGACGCAGTAG                              |                       |
| <i>LncIRS1</i> 3'RACE | 3' outer primer            | CTAATACGACTCACTATAGGGCAAGCAGTG<br>GTATCAACGCAGAGT | <i>LncIRS1</i> 3'RACE |
|                       | 3' inner primer            | AAGCAGTGGTATCAACGCAGAGT                           |                       |
|                       | 3' lncIRS1<br>outer primer | AAGTGCTGCTGTGCTGATTAACTGCCAC                      |                       |
|                       | 3' lncIRS1<br>inner primer | ATGCACACAAGCACACTAGCTTT                           |                       |
| <i>LncIRS1</i> 5'RACE | 5' outer primer            | CTAATACGACTCACTATAGGGCAAGCAGTG<br>GTATCAACGCAGAGT | <i>LncIRS1</i> 5'RACE |
|                       | 5' inner primer            | AAGCAGTGGTATCAACGCAGAGT                           |                       |
|                       | 5' lncIRS1<br>outer primer | GTGCAGACGTGAACTGGCACTGTACTGATTT                   |                       |
|                       | 5' lncIRS1                 | GGACAGACAAATTCTCACATGCACTT                        |                       |

|                    |                      |                                                   |                    |
|--------------------|----------------------|---------------------------------------------------|--------------------|
|                    | inner primer         |                                                   |                    |
| <i>IRS1</i> 3'RACE | 3' outer primer      | CTAATACGACTCACTATAGGGCAAGCAGTG<br>GTATCAACGCAGAGT | <i>IRS1</i> 3'RACE |
|                    | 3' inner primer      | AAGCAGTGGTATCAACGCAGAGT                           |                    |
|                    | 3' IRS1 outer primer | TCTACGCCGCCGAGGACTCGTCCTCC                        |                    |
|                    | 3' IRS1 inner primer | AACGGACTCAACTACATC                                |                    |
| <i>IRS1</i> 5'RACE | 5' outer primer      | CTAATACGACTCACTATAGGGCAAGCAGTG<br>GTATCAACGCAGAGT | <i>IRS1</i> 5'RACE |
|                    | 5' inner primer      | AAGCAGTGGTATCAACGCAGAGT                           |                    |
|                    | 5' IRS1 outer primer | GGGGGCCCGACTTGTGTCTCCATT                          |                    |
|                    | 5' IRS1 inner primer | GCTCTTGGGTTTGCGCAAGTAAC                           |                    |
